# Supplementary material for: Patient-reported outcomes of cancer survivors in England 1–5 years after diagnosis: a cross-sectional survey
Source: PubMed Central journal article supplement — BMJ Open. 2013 Apr 12;3(4):e002317. doi: 10.1136/bmjopen-2012-002317 (PMC3641492; doi:10.1136/bmjopen-2012-002317), 2013-04-12
Supplement: bmjopen-2012-002317.draft_revisions.pdf [file bmjopen-2012-002317.draft_revisions.pdf]

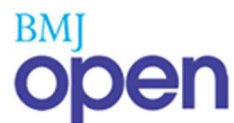

**Patient Reported Outcomes of Cancer Survivors in England  
1 to 5 years after Diagnosis: a cross-sectional survey.**

|                                 |                                                                                                                                                                                                                                              |
|---------------------------------|----------------------------------------------------------------------------------------------------------------------------------------------------------------------------------------------------------------------------------------------|
| Journal:                        | <i>BMJ Open</i>                                                                                                                                                                                                                              |
| Manuscript ID:                  | bmjopen-2012-002317                                                                                                                                                                                                                          |
| Article Type:                   | Research                                                                                                                                                                                                                                     |
| Date Submitted by the Author:   | 06-Nov-2012                                                                                                                                                                                                                                  |
| Complete List of Authors:       | Glaser, Adam; Leeds Teaching Hospitals NHS Trust, Department of Paediatric Oncology<br>Fraser, Lorna<br>Corner, Jessica<br>Feltbower, Richard<br>Morris, Eva<br>Hartwell, Greg<br>Richards, Sir Mike; Director, National Cancer Action Team, |
| <b>Primary Subject Heading</b>: | Oncology                                                                                                                                                                                                                                     |
| Secondary Subject Heading:      | Health policy, Public health, Research methods                                                                                                                                                                                               |
| Keywords:                       | Adult oncology < ONCOLOGY, Breast tumours < ONCOLOGY, Gastrointestinal tumours < ONCOLOGY, Lymphoma < ONCOLOGY, Urological tumours < ONCOLOGY                                                                                                |
|                                 |                                                                                                                                                                                                                                              |

SCHOLARONE™  
Manuscripts

only

**Title:**

**Patient Reported Outcomes of Cancer Survivors in England 1 to 5 years after Diagnosis: a cross-sectional survey.**

|                   |     |                                                                |
|-------------------|-----|----------------------------------------------------------------|
| Glaser Adam W     | DM  | Leeds Teaching Hospitals NHS Trust <sup>1</sup>                |
| Fraser Lorna K    | PhD | University of York <sup>2</sup>                                |
| Corner Jessica    | PhD | University of Southampton <sup>3</sup>                         |
| Feltbower Richard | PhD | University of Leeds <sup>4</sup>                               |
| Morris Eva JA     | PhD | University of Leeds <sup>5</sup>                               |
| Hartwell Greg     | MA  | Cancer Policy Team, Department of Health <sup>6</sup>          |
| Richards Mike     | MD  | Cancer Policy Team, Department of Health, England <sup>6</sup> |

1. Department of Paediatric Oncology, Martin Wing, Leeds General Infirmary, Great George Street, Leeds, LS1 3EX
2. Department of Health Sciences, Heslington, York, YO10 5DD
3. Faculty of Health Sciences, University of Southampton, Southampton, SO17 1BJ.
4. Division of Epidemiology, Level 8 Worsley Building, Leeds Institute of Genetics, Health & Therapeutics, University of Leeds, Leeds, UK
5. Section of Epidemiology & Biostatistics, Leeds Institute of Molecular Medicine, Level 6 Bexley Wing, St James's University Hospital, Leeds LS9 7TF
6. Cancer Policy Team, Department of Health, Wellington House, London, England.

**Corresponding Author:**

Adam Glaser

Address: Consultant Paediatric Oncologist, Department of Paediatric Oncology, D Floor, Martin Wing, Leeds General Infirmary, Great George Street, Leeds, LS1 3EX

Tel: 0113 3928779

Email: [adam.glaser@leedsth.nhs.uk](mailto:adam.glaser@leedsth.nhs.uk)

**Key Words:**

Cancer, Survivorship, Quality of Life, Patient Reported Outcomes, EQ5D, FACT

**Word Count:**

abstract: 300 & main body of paper: 3994

1  
2  
3 Abstract

4  
5 **Objectives:** To determine the feasibility and value of patient reported outcome measures  
6 (PROMS) in assessing quality of life (QoL) to inform the development of a national PROMS  
7 programme for cancer.  
8

9  
10 **Design:** Cross-sectional postal survey of cancer survivors using a population-based sampling  
11 approach.  
12

13  
14 **Setting:** English National Health Service.  
15

16  
17 **Participants:** 4,992 breast, colorectal, prostate and Non-Hodgkin's Lymphoma survivors one  
18 to five years from diagnosis.  
19

20  
21 **Primary and Secondary Outcome Measures:** Implementation issues, response rates and  
22 cancer-specific morbidities utilising items including the EQ5D QoL scale, tumour-specific  
23 sub-scales of the Functional Assessment of Cancer Therapy and Social Difficulties Inventory.  
24

25 **Results:**

26  
27 3,300 (66%) survivors invited to participate returned completed questionnaires. The  
28 majority aged 85+ years did not respond and there was an effect of deprivation on response  
29 rates. Response rates did not differ by gender, time since diagnosis or cancer type.  
30

31  
32 The presence of one or more long term conditions was associated with significantly lower  
33 QoL scores. Individuals from the most deprived areas reported lower QoL scores and poorer  
34 outcomes on other measures, as did those self-reporting recurrent disease or uncertainty  
35 about disease status. QoL scores were stable over time for all cancers except NHL. Overall  
36 QoL scores were lower than those from the general population in the Health Survey for  
37 England (2008) and General Practice Patient Survey.  
38

39  
40 47% of patients reported fear of recurrence whilst 20% reported moderate or severe  
41 difficulties with mobility or usual activities. Bowel and urinary problems were common  
42 among colorectal and prostate patients. Poor bowel and bladder control were significantly  
43 associated with lower QoL scores.  
44  
45  
46  
47  
48

49  
50  
51 **Conclusions:** This method of assessing QoL of cancer survivors is feasible and acceptable to  
52 most survivors. Inclusion of PROMS as a routinely collected health dataset will enable  
53 identification of, and support for, the specific needs of survivors whilst allowing for  
54 comparison of outcome by service provider.  
55  
56  
57  
58  
59

1  
2  
3  
4  
5  
6  
7  
8  
9  
10  
11  
12  
13  
14  
15  
16  
17  
18  
19  
20  
21  
22  
23  
24  
25  
26  
27  
28  
29  
30  
31  
32  
33  
34  
35  
36  
37  
38  
39  
40  
41  
42  
43  
44  
45  
46  
47  
48  
49  
50  
51  
52  
53  
54  
55  
56  
57  
58  
59  
60

**Funding**

This survey was funded by the Department of Health, England.

For peer review only

## Article Summary

### Article Focus

To determine the feasibility of routinely collecting population-based patient reported outcomes (PROMS) of cancer survivors to gather information on quality of life and cancer related morbidities that can be used to inform the development of a national PROMS programme for cancer.

### Key messages

- Collection of information on quality of life from cohorts of cancer patients who are 1 to 5 years post diagnosis through cancer registries is feasible.
- The best quality of life was reported by those in remission and with no other long term conditions.
- This information will enable health economies to compare outcome across provider organisations and facilitate provision of services to meet the needs of cancer survivors.

### Strengths and Limitations

- Findings relate to the largest European survey of survivors of multiple cancer types at clearly defined time points from diagnosis.
- The study design eliminates many of the criticisms which have hindered the collection of population-based cancer patient reported outcome data in the past.
- English cancer registries provide a reliable denominator population from which to identify eligible participants.
- The questionnaires for the four cancer groups were identified as having face and content validity by a panel of health and social care professionals prior to use.
- Presence of multiple cancer groups, time points and some missing data may have resulted in a lack of power for certain analyses.
- Selection bias may have arisen through differences in-response rates according to cancer group, deprivation category and age.

1  
2  
3  
4  
5  
6  
7  
8  
9  
10  
11  
12  
13  
14  
15  
16  
17  
18  
19  
20  
21  
22  
23  
24  
25  
26  
27  
28  
29  
30  
31  
32  
33  
34  
35  
36  
37  
38  
39  
40  
41  
42  
43  
44  
45  
46  
47  
48  
49  
50  
51  
52  
53  
54  
55  
56  
57  
58  
59  
60

- The study excluded those treated in the private sector.

For peer review only

## Introduction

1.8 million people are living with and beyond a diagnosis of cancer in England and prevalence is predicted to increase by 3% per annum.<sup>1</sup> Cancer treatments are effectively reducing mortality and extending life, yet there is evidence that physical, psychological and social needs are not being addressed by the health and social care services, with individuals reporting significant unmet needs<sup>2</sup>. There is a lack of robust population-based information from which the prevalence, and impact, of disease and treatment associated morbidity burden can be ascertained and policy for appropriate interventions developed<sup>3</sup>. It has been equally difficult for health economies to compare the quality of health of those following treatment for cancer to those living with other long term conditions (LTC). These deficits have hampered the provision of comprehensive robust services for this growing population<sup>4</sup>.

In the United States a number of significant initiatives have been launched to systematically measure health outcomes in cancer survivors using patient reported outcome measures (PROMS) through the National Cancer Institute and American Cancer Society<sup>3 5-6</sup>. In Europe, at least one regional cancer register has started to collect PROMS via approaches made through the treating clinical teams<sup>7-8</sup>. The focus of PROMS work to date has been on refining treatment decision making for individuals and determining methodological approaches to implementation and analysis<sup>5-6 9-11</sup>. These efforts have yet to feed through into major national health system service improvement initiatives. The evaluation of patients' experiences of cancer care in England, through the National Cancer Patient Experience Survey, has resulted in care provider organisations and commissioners being able to identify areas of strengths and weakness in acute cancer care provision<sup>12</sup>.

Our objective was to determine the feasibility of routinely collecting population-based PROMS of cancer survivors to gather information on quality of life (QoL) and cancer related morbidities that can be used to inform the development of a national PROMS programme for cancer.

## Methods

### *Study design*

A cross-sectional postal survey was undertaken of individuals with a diagnosis of breast, colorectal, non-Hodgkin's lymphoma (NHL) or prostate cancer one, two, three and five years earlier. These four time-points were chosen to gain an understanding of whether PROMS varied over time. Patients attending private healthcare centres were excluded as the aims of the study focused on the assessment of PROMS within the National Health Service (NHS) in England.

### *Cohort Identification and Survey Process*

Three cancer registries (Thames Cancer Registry, Eastern Cancer Registry and Information Centre, West Midlands Cancer Intelligence Unit) were chosen as representative examples of the eight cancer registries in England. They provided information on all relevant cancer diagnoses<sup>12</sup> (Supplementary File 1) between 01/02/2010-30/04/2010, 01/02/2009-30/04/2009, 01/02/2008-30/04/2008, and 01/02/2006-30/04/2006. The individual study cohorts for each cancer at time points one, two, three and five years from date of recorded diagnosis were compiled through identification of the 312 cases diagnosed most closely to a specified time-point (First of February for each year). Cases were excluded if: under the age of 16 years, deceased, or not known to have a UK address.

Identified participants were sent a questionnaire by post by the survey provider, *Quality Health*. This was sent under cover of a standard introductory letter with the letter-head of the cancer centre most recently recorded by the cancer registry as having provided treatment. The survey covered patients attending 70 of 160 (43%) acute NHS Trusts delivering cancer care in England during 2011. Patients consented to taking part in the survey by returning questionnaires and declined by not returning them, or by returning blank questionnaires. Two reminders were sent to non-responders. Checks for deceased patients were undertaken by the registries via the Demographic Batch Service at four separate time points in the survey process.



1  
2  
3 Details of a dedicated freephone telephone helpline, staffed 24 hours each day, were  
4 provided.  
5  
6

7  
8 *Questionnaire design and content* (Supplementary files 2, 3, 4 and 5)  
9

10 Questionnaires were developed for each cancer group. Content was identified through  
11 literature review, commissioned expert reviews<sup>13-15</sup>, consultation with patient groups,  
12 cancer charities and expert advisory groups.  
13  
14

15 Generic content included:  
16

- 17 • Demographic and treatment-related questions adapted from the National Cancer  
18 Patient Experience Survey.<sup>12</sup>
- 19 • Self-reported response to treatment and disease status
- 20 • Amount of physical activity performed each week quantified according to the  
21 Chief Medical Officer of England's recommendations<sup>16</sup>.
- 22 • Presence or absence of long-term conditions (LTCs) other than cancer, using a list  
23 widely used in English Department of Health surveys.
- 24 • EQ5D: A 5 item generic health-related quality of life measure<sup>17-18</sup> chosen as it is a  
25 generic measure of health status widely used to evaluate population health in  
26 England<sup>17</sup>.
- 27 • Social Difficulties Inventory (SDI): A cancer survivor specific measure covering  
28 wider QoL domains<sup>19-20,21</sup> including information on the social consequences of  
29 cancer.
- 30 • Experience of care.<sup>22</sup>
- 31 • Individual components on psychological issues and work status identified  
32 through the literature as being important to cancer survivors but not covered by  
33 other components of the survey<sup>23, 24</sup>.
- 34
- 35
- 36
- 37
- 38
- 39
- 40
- 41
- 42
- 43
- 44
- 45
- 46
- 47

48 Tumour-specific content included

- 49 • Functional Assessment of Cancer Therapy (FACT) tumour specific  
50 components (FACT-B, FACT-C, FACT-Lym and FACT-P for breast, colorectal,  
51 NHL and prostate cancer respectively)<sup>25</sup>.
- 52
- 53
- 54
- 55
- 56
- 57
- 58
- 59
- 60

1  
2  
3 *A detailed description of the qualitative comments provided by respondents are reported in a*  
4 *parallel submission to the BMJ.*  
5  
6  
7

8  
9 Cognitive testing was performed on the four site-specific versions of the questionnaire prior  
10 to their general use. This was done by sending questionnaires to volunteers (identified  
11 through cancer charities and the survey provider) prior to participating in a telephone  
12 interview. This style of testing was used to determine the population's ability to complete  
13 the questionnaire independently and to follow routing and other instructions in the  
14 questionnaire without prompting or help. Appropriate alterations were then made to the  
15 questionnaire. The two required changes were omission of a similar item from the FACT-B  
16 and FACT-P questionnaires "I am able to feel like a woman" and "I am able to feel like a  
17 man".  
18  
19  
20  
21  
22  
23  
24

#### 25 26 *Data Handling/Analysis*

27  
28 Age (at time of survey) was categorised as <55, 55-64, 65-74, 75-84, and ≥85 years. Self-  
29 reported ethnicity was grouped into white, asian, mixed, black and other. Deprivation  
30 category was based on the complete index of multiple deprivation (IMD)<sup>26</sup>. This was derived  
31 from the lower super output area (small census area) associated with their place of  
32 residence at the time of completing the survey, and used because the survey did not include  
33 questions related to income or educational level.  
34  
35  
36  
37  
38

39  
40 Participants were asked if they had any LTC other than their cancer diagnosis and were  
41 asked to tick the appropriate LTCs. This variable was categorised into 'no other', 'one other'  
42 and 'two or more LTCs'.  
43  
44  
45

46  
47 A crosswalk algorithm was used to convert the 5L EQ5D to the 3L version, allowing a  
48 weighted health score to be assigned for each individual.<sup>27</sup> United Kingdom population data  
49 were used to calculate weighted scores (range -0.5 to 1 [perfect health]). Due to skewness,  
50 this outcome variable was categorised and ordered logistic regression undertaken. Three  
51 categories representing 'high', 'medium' and 'low' QoL scores were defined for ease of  
52 interpretation; these comprised scores equal to 1, less than 1 but greater than or equal to  
53 0.5 and less than 0.5. Odds ratios should be interpreted either as the odds of being in group  
54  
55  
56  
57  
58  
59

1  
2  
3 2 (medium QoL scores) or group 3 (low QoL scores) compared to group 1 (high QoL scores)  
4 or the odds of being in group 3 (low QoL scores ) compared to group 1 or group 2.  
5  
6  
7

8 Cancer-specific questions from FACT<sup>25</sup> were used as explanatory variables in this analysis  
9 (FACT total score could not be calculated as only the cancer-specific subscale questions  
10 were included). Patient reported treatments were used in the analyses and treatment  
11 combinations were categorised for each cancer site with the most common used as the  
12 reference group.  
13  
14  
15  
16

### 17 18 19 *Statistical methods*

20 Chi-squared tests were used to compare categorical variables. Descriptive statistics were  
21 compared across cancer sites but the statistical models were stratified by cancer site.  
22 Variables were entered into the logistic regression model based on their *a priori* clinical and  
23 public health importance after agreement by the study investigators. Formal variable  
24 selection procedures were not invoked primarily due to statistical problems associated with  
25 these data-driven procedures<sup>28</sup> and, secondly, so that findings could be compared  
26 consistently across cancer sites and time points. Statistical significance was set at 1% to  
27 minimise the chances of false-positive associations. All analyses were undertaken using  
28 STATA v12.1.  
29  
30  
31  
32  
33  
34  
35  
36  
37

### 38 39 *Ethics and governance*

40 Approval was given to approach patients without informed consent by the National  
41 Information Governance Board (Supplementary File 6) as the study was performed as  
42 service evaluation<sup>29</sup>.  
43  
44  
45  
46  
47  
48  
49  
50  
51  
52  
53  
54  
55  
56  
57  
58  
59  
60

## Results

### *Participants*

Questionnaires were sent to 4992 individuals, 126 (2.5%) of these had moved or died prior to receiving the questionnaire resulting in a final sample size of 4866. 3300 completed questionnaires were received (66% of the study sample). Of the surveys received by participants, the response rate was 68% (3300/4866).

### *Response rates*

Response rate varied significantly between cancer groups (Table 1a): 69.4% in the prostate group compared to 62.3% in the NHL group ( $p < 0.001$ ).

There was significant difference in the age structure of the non-responders vs. responders with a higher proportion of non-responders in the  $\geq 85$  years age group ( $p < 0.001$ ).

Response rates differed according to deprivation status (Table 1a) with a response rate of 71.4% in the least deprived category compared to 57.1% in the most deprived category ( $p < 0.001$ ).

No difference in response rates by time since diagnosis, sex or cancer type was found.

### *Demographics of respondents (Table 1b)*

Overall there were more males than females. Median age was 69 years (range 36-102). There was significant variation in the distribution of ethnicity by cancer group with higher proportions of non-white ethnic groups with NHL. There was no significant difference by deprivation between cancer groups. Overall more than half of patients reported having a LTC. Breast cancer responders displayed a similar age profile to the overall UK incident population. There were fewer reported LTCs in the breast cohort than in other groups but this did not reach statistical significance.

### *Missing data*

Missing data levels were extremely low, typically less than 5% for most fields. SDI had slightly higher levels of missing data with completeness ranging from 80-85%. For the regression modelling (Tables 3a-3d) which used complete case analysis approach, completeness levels were lower and ranged from 60% (colorectal, prostate) to 83% (breast). There was no evidence that the prevalence of missing data was related to the order of the questions.

### *Helpline calls and other contact from survey participants*

64 calls were made to the helpline, whilst further information about patient status was received via letters from patients (11) and NHS Trusts (2). The total number of enquiries was 77, representing 0.02% of the study cohort.

### *Generic PROMS*

Responses for the five EQ5D questions demonstrated that a higher percentage of NHL patients reported problems with self-care, mobility and usual activities. Two-thirds of breast cancer patients reported some degree of pain (Supplementary Table 1).

When detailed responses for the five EQ5D questions were summarised by time since diagnosis, there were no significant differences for pain, mobility, usual activities or self-care but the percentage reporting anxiety or depression symptoms decreased significantly ( $p=0.01$ ) (Supplementary Table 2).

Skewed weighted health scores were obtained from the EQ5D by cancer group (Supplementary Figure 1). The prostate group had significantly higher median (0.88) scores than the other three groups (0.84) ( $p=0.001$ ). The proportion of the populations reporting high QoL scores ranged from 24.4% for breast to 40.0% for prostate cancer (Table 2). Conversely, the proportion reporting low QoL scores ranged from 8.9% for breast to 13.1% for NHL. For all tumour groups, irrespective of remission status, the percentage of individuals reporting lower QoL scores increased as the number of other LTCs increased (Supplementary Tables 3-4).

### *Result by Tumour Type*

Multivariable ordered logistic regression (Tables 3a-3d) identified three factors which were consistently associated with lower QoL scores irrespective of tumour type: presence of LTCs, undertaking little physical activity and self-reported disease status.

#### *Breast Cancer (Table 3a)*

Increasing number of LTCs, having recurrence of disease or being uncertain of disease status were associated with poorer outcomes across all three measures: The presence of one (OR 1.84, 95%CI 1.25,2.70) or two or more (Odds Ratio (OR) 7.30, 95%Confidence Interval (CI) 4.45,11.93) LTCs was significantly associated with lower QoL scores. Individuals self-reporting recurrent disease (OR 4.70, 95%CI 1.92,11.52) or those uncertain about their disease status (OR 2.51, 95%CI 1.27,4.96) were significantly more likely to report lower QoL scores compared to those self-reporting remission.

Increasing age and more days undertaking physical activity were significantly associated with better outcomes in EQ5D, SDI and FACT-B measures: Those aged 65-74 reported significantly higher QoL scores compared to under 55s (OR 0.36, 95%CI 0.22,0.58). Increasing physical activity was associated with higher QoL scores with each additional reported day per week of physical activity reducing the odds of a lower score by 12% (OR 0.88, 95%CI 0.82,0.95).

Individuals from the most deprived areas were significantly more likely to report lower EQ5D derived QoL scores than those from the most affluent areas (OR 3.00, 95%CI 1.64-5.50). Poorer outcomes in FACT-B items were associated with being in the most deprived category.

#### *Colorectal Cancer (Table 3b)*

The presence of one (OR 2.09, 95%CI 1.29,3.37) or two or more (OR 4.83, 95%CI 2.85,8.21) LTCs was significantly associated with lower QoL scores. Those who completed the questionnaire whilst undergoing treatment (OR 7.03, 95%CI 2.44,20.21), experiencing recurrent disease (OR 4.56, 95%CI 1.54,13.49) or who were uncertain about their disease

1  
2  
3 status (OR 2·67, 95%CI 1·23,5·79) had significantly increased odds of reporting lower QoL  
4 scores compared to those reporting remission.  
5  
6

7  
8 Increasing physical activity was significantly associated with a 17% decrease in the odds of a  
9 lower QoL score with each additional day per week of physical activity (OR 0·83, 95%CI  
10 0·76,0·90).  
11  
12

13  
14  
15 23·5% reported urinary leakage, 19·0% difficulty controlling their bowels and 19·2% had a  
16 stoma. Individuals experiencing any difficulty controlling their bowels were more than twice  
17 as likely to report lower QoL scores (OR 2·30, 95%CI 1·43,3·72). The presence of a stoma or  
18 urinary leakage was not significantly associated with QoL.  
19  
20  
21

22  
23  
24 Greater difficulties with holidays and travel were reported by those with colorectal cancer  
25 compared to other cancers. For example, only 51% of colorectal respondents reporting no  
26 difficulty compared to 64% with breast or prostate cancer.  
27  
28  
29

### 30 31 *Non-Hodgkin's Lymphoma (Table 3c)*

32  
33 The presence of one (OR 2·16, 95%CI 1·44,3·24) or two or more (OR 7·26, 95%CI 4·51,11·69)  
34 LTCs was significantly associated with lower QoL scores. Those currently being treated (OR  
35 2·57, 95%CI 1·52,4·33), experiencing a recurrence (OR 3·73, 95%CI 1·68,8·29) or who were  
36 not sure about their disease status (OR 3·04, 95%CI 1·58,5·84) had increased odds of  
37 reporting lower QoL scores compared to those in remission. These same factors were  
38 associated with poorer outcomes on the SDI and FACT-Lym items.  
39  
40  
41  
42  
43  
44

45  
46 A significant positive association between increasing physical activity and QoL was seen with  
47 each additional day of physical activity reducing the odds of lower QoL score by 9% (OR  
48 0·91, 95%CI 0·84,0·98). QoL seemed to improve with time from diagnosis for NHL but the  
49 trend was not significant ( $p=0\cdot100$ ).  
50  
51  
52  
53  
54  
55  
56  
57  
58  
59  
60

### *Prostate Cancer (Table 3d)*

The presence of two or more LTCs (OR 4.28, 95%CI 2.62,7.01) or being in the most deprived category (OR 2.57, 95%CI 1.31,5.04) were significantly associated with lower QoL scores, as well as increased social distress and difficulties identified by FACT-P.

Patients who had surgery only (compared to radiotherapy and hormone treatment) had significantly higher QoL scores (OR 0.39, 95%CI 0.21,0.71) as did those reporting more days of physical activity (OR 0.82, 95%CI 0.75,0.88).

38.5% of prostate patients reported some degree of urinary leakage, 12.9% reported difficulty controlling their bowels and 58.4% reported being unable to have an erection with a further 11% reporting significant difficulty in having or maintaining an erection. The presence of urinary leakage was significantly associated with lower QoL scores (OR 3.52, 95%CI 2.32,5.35). Erectile dysfunction and difficulty controlling bowels were not significantly associated with QoL scores.

Prostate survivors had significantly lower overall social distress scores on the SDI as well as fewer problems in all three sub-scales (everyday living, money matters, self and others) compared to other cancer types.

### *Fear of recurrence and dying*

Almost half (47.3%) of patients reported fear of recurrence and over a quarter (26.8%) reported fear of dying (Supplementary Table 5). Both of these fears decreased significantly with time since diagnosis.

### *Physical activity*

Around one-fifth (21.4%) of participants reported taking 30 minutes or more of physical activity at least five days a week (in line with the Chief Medical Officer's recommendations). This varied by cancer: 16.5% for NHL, 19.0% for breast, 20.2% for colorectal and 29.0% for prostate. Overall 29.8% of patients reported doing no physical activity; this varied by cancer



1  
2  
3 group with 33·5% of NHL, 31·5% of colorectal and 27·4% of both breast and prostate  
4 survivors doing no physical activity.  
5  
6  
7  
8  
9  
10  
11  
12  
13  
14  
15  
16  
17  
18  
19  
20  
21  
22  
23  
24  
25  
26  
27  
28  
29  
30  
31  
32  
33  
34  
35  
36  
37  
38  
39  
40  
41  
42  
43  
44  
45  
46  
47  
48  
49  
50  
51  
52  
53  
54  
55  
56  
57  
58  
59  
60

For peer review only

## Discussion

This study represents the largest European survey of survivors of multiple cancer types at clearly defined time points from diagnosis and demonstrates the feasibility of this straightforward method of collecting informative self-reported PROMS data on population-based cohorts of individuals living with and beyond a diagnosis of cancer in England. The process eliminates many of the potential biases that have hindered the collection of population-based cancer PROMS data in the past originating from the use of clinical trial data or acute service provider units for recruitment<sup>30</sup>. English cancer registries, which capture approximately 98-99% of all cancers diagnosed in England<sup>31</sup>, provide a reliable denominator population from which to identify eligible participants.

### *Acceptability and Validity*

The relatively high response rate, low level of missing data and low number of calls to the dedicated 24 hour helpline suggest that the methodology is acceptable to the majority of participants. However, the finding of lower participation amongst the elderly or those residing in areas with the greatest socio-economic deprivation would suggest that individuals from these vulnerable groups may need to be assessed by alternative methods. Whilst the questionnaires were identified as having face and content validity by a panel of health and social care professionals prior to use this study does not permit us to comment on the responsiveness or reliability of the instruments. However, the core components of the questionnaires had been identified by independent review as being reliable and appropriate for use in this setting<sup>13-15</sup>.

### *Key results*

The QoL of survivors for all four cancers was significantly related to self-reported disease status (remission versus relapse/uncertain), age and presence of LTCs. QoL appeared to either remain constant or improve slightly as time from diagnosis increased. This suggests that some problems experienced by cancer patients persist for long periods.

We have quantified the community prevalence of previously known late morbidities and assessed their impact on QoL. Problems relating to urinary and bowel control have been

1  
2  
3 shown to be common, with nearly 40% of prostate survivors reporting urinary leakage and  
4 13% difficulty controlling their bowels. Similarly, amongst colorectal survivors nearly a  
5 quarter reported urinary leakage and 19% reported difficulty controlling their bowels.  
6 These rates are comparable to other studies of cancer patients<sup>32</sup> but exceed those seen in  
7 non-cancer populations where the prevalence of urinary incontinence in adult men was  
8 4.5% overall, rising to 16.0% for over 75 year olds<sup>33</sup>. In this study, the presence of “urinary  
9 leakage” in prostate survivors and “of difficulty controlling their bowels” in colorectal  
10 survivors were significantly associated with lower QoL scores making such symptoms  
11 important to address. Erectile dysfunction in prostate survivors, though common, did not  
12 significantly impact on QoL. The finding that QoL or physical problems such as difficulty  
13 controlling bowels or incontinence do not appear to be less prevalent five years following  
14 treatment may suggest individuals are not receiving adequate help or treatment for these  
15 conditions. Greater efforts should be made in prevention and early intervention for  
16 problems resulting from cancer treatment, and directed at those most at risk of the long-  
17 term problems identified from this study.  
18  
19  
20  
21  
22  
23  
24  
25  
26  
27  
28  
29  
30

### 31 *Comparison with the General Population Data*

32 Most survivors in this study who were in remission and did not report a LTC were found to  
33 have a high QoL score. However, even the subgroup in remission with no LTC reported  
34 lower QoL scores than the data available from general population studies (Table 4). Some of  
35 this difference may be accounted for by age, as the Health Survey for England (2008)<sup>34</sup> and  
36 the General Practice Patient Survey (GPPS)<sup>35</sup> cohorts were substantially younger than the  
37 reported cancer study cohort. This assumption is supported from the HSE cohort aged over  
38 45 years (median age 63, n=7672) which reported a reduction in QoL scores (good 45%,  
39 moderate 46%, poor 9%).  
40  
41  
42  
43  
44  
45  
46  
47  
48

### 49 *Long-term Conditions*

50  
51  
52 The presence of one or more LTCs, other than their cancer diagnosis, was associated with  
53 lower QoL scores in all four cancer groups and mirrors findings from other studies<sup>2 36</sup>. The  
54 presence of multi-morbidity and LTCs identifies sub-sets of survivors who may require more  
55 active support than others. This needs to be factored into risk stratification models as  
56  
57  
58  
59  
60

1  
2  
3 health services move away from hospital based cancer follow-up towards a greater focus on  
4 self-management.  
5  
6

### 7 8 *Physical Activity* 9

10 The extent to which cancer survivors take physical activity has not previously been reported  
11 in England. The findings agree with those from the USA<sup>37</sup>, suggesting that prostate survivors  
12 are more likely than others to take moderate or vigorous physical activity. We observed an  
13 association between higher levels of activity and higher QoL scores, but it is not possible to  
14 assess from a cross-sectional survey whether there is a causal relationship.  
15  
16  
17  
18

19  
20 A smaller percentage of study respondents (21.4%) met the Chief Medical Officer of  
21 England's recommendations for physical activity when compared with the HSE(2008) in  
22 which 34% of adults met these guidelines<sup>34</sup>. Restricting the HSE data to a similar age profile  
23 as the study participants (60-75 years) saw similar levels of physical activity (23%). The HSE  
24 data found a trend of decreased physical activity with increasing age, yet, in this study,  
25 prostate survivors (the oldest subgroup) reported higher physical activity levels.  
26  
27  
28  
29  
30  
31

### 32 33 *Limitations* 34

35 The presence of multiple cancer groups and time points, along with some missing data  
36 (typically <5%), may have resulted in a lack of power for certain analyses. The non-response  
37 rate varied significantly by cancer group, deprivation category and age, which could result in  
38 selection bias when generalising results. Our study excluded those treated in the private  
39 sector (estimated to be under 5% of cancer cases in England<sup>38</sup>). The highly skewed EQ5D  
40 outcome variable was categorised into three levels for multivariable modelling, which  
41 meant that information and perhaps discriminatory power was lost. However, our model  
42 parameterisation enabled a more natural interpretation of EQ5D QoL data and when  
43 comparisons were made with other alternative models, such as tobit regression, findings  
44 were very similar.  
45  
46  
47  
48  
49  
50  
51  
52

### 53 54 *Where next for Cancer PROMS in England?* 55

56 The use of cancer PROMS has generally been restricted to clinical research, especially  
57 clinical trials or small studies. Whilst important work has been undertaken to develop  
58  
59

1  
2  
3 approaches for the measurement of PROMS, they have not been incorporated into routine  
4 measurement at a whole health system level. This study demonstrates that population-  
5 based survey approaches are feasible, yield acceptable response rates and are cost-  
6 effective. This approach could provide important insights into where improvement efforts  
7 should be targeted to reduce the long-term burden of cancer and its treatments on the  
8 growing number of cancer survivors.  
9

10  
11  
12  
13  
14  
15 Improving QoL in patients with LTC is one of the key goals of English government health  
16 policy (forming Domain 2 of the NHS Outcomes Framework)<sup>39</sup>. The approach we report  
17 should be scaled up and integrated within routine health outcome assessment on a national  
18 basis so that results can be distilled down to hospital/service provider level, as has been  
19 done in relation to the experience of acute care of cancer patients<sup>12</sup>. Improvements in  
20 quality of survivor care could then be driven by publishing hospital/provider level data.  
21  
22  
23  
24  
25

26  
27  
28 Our findings support the on-going international efforts to identify risk factors for poor  
29 health-related QoL outcomes following a cancer diagnosis. These include the presence of  
30 other LTCs, deprivation and limited physical activity. These, along with the high prevalence  
31 of on-going condition-specific problems such as bowel, urinary and erectile dysfunction,  
32 warrant attention by cancer services.  
33  
34  
35  
36  
37  
38  
39  
40  
41  
42  
43  
44  
45  
46  
47  
48  
49  
50  
51  
52  
53  
54  
55  
56  
57  
58  
59  
60

### *Acknowledgements*

Dr Nicola Davies, Professor Jane Maher, Dr Mick Peake, Professor Galina Velikova and Dr Penny Wright provided expert advice regarding questionnaire and study design. Thames Cancer Registry, Eastern Cancer Registry and Information Centre, and West Midlands Cancer Intelligence Unit provided information on all eligible cancer survivors. FACIT provided permission to use components of the FACT questionnaires and Penny Wright granted permission to use the Social Difficulties Inventory.

### *Funding*

This survey was funded by the Department of Health, England.

### *Declaration of Competing Interests*

All authors have completed the Unified Competing Interest form at [www.icmje.org/coi\\_disclosure.pdf](http://www.icmje.org/coi_disclosure.pdf) (available on request from the corresponding author) and declare: financial support for the submitted work from the Department of Health, England: AWG, GH and MR were employed by the Cancer Policy Team, Department of Health, England, whilst the research was carried out; AWG, LKF, RGF and EF, received financial support from Department of Health, England, to carry out the analysis of data reported; JC and MR co-chaired the Department of Health, England, Cancer Patient Experience Advisory Group.

### *Data Sharing Statement*

Statistical code and dataset are available from the corresponding author at the University of Leeds, who will provide a permanent, citable and open access home for the dataset.

### *Author Contribution Statement*

Adam Glaser contributed to the study design, data collection, data analysis, data interpretation and writing of this manuscript.

Lorna Fraser contributed to the data analysis, data interpretation and writing of this manuscript.

Jessica Corner contributed to the study design, data collection, data interpretation and writing of this manuscript.

1  
2  
3 Richard Feltbower contributed to the data analysis, data interpretation and writing of this  
4 manuscript.  
5

6  
7 Eva Morris contributed to the data analysis, data interpretation and writing of this  
8 manuscript.  
9

10 Greg Hartwell contributed to the study design and data collection.  
11

12 Mike Richards contributed to the study design, data interpretation, and writing of this  
13 manuscript.  
14

15  
16  
17 Copyright/licence for publication statement  
18

19  
20 “The Corresponding Author has the right to grant on behalf of all authors and does grant on  
21 behalf of all authors, a worldwide licence to the Publishers and its licensees in perpetuity, in  
22 all forms, formats and media (whether known now or created in the future), to i) publish,  
23 reproduce, distribute, display and store the Contribution, ii) translate the Contribution into  
24 other languages, create adaptations, reprints, include within collections and create  
25 summaries, extracts and/or, abstracts of the Contribution, iii) create any other derivative  
26 work(s) based on the Contribution, iv) to exploit all subsidiary rights in the Contribution, v)  
27 the inclusion of electronic links from the Contribution to third party material where-ever it  
28 may be located; and, vi) licence any third party to do any or all of the above.”  
29  
30  
31  
32  
33  
34  
35  
36  
37  
38  
39  
40  
41  
42  
43  
44  
45  
46  
47  
48  
49  
50  
51  
52  
53  
54  
55  
56  
57  
58  
59  
60

Table 1a Demographic data of responders and non-responders

| Characteristic                  |                             | Responders<br>(n=3300) |      | Non Responders<br>(n=1692) |      | Total<br>number<br>approached | Overall<br>Percentage<br>Responding |
|---------------------------------|-----------------------------|------------------------|------|----------------------------|------|-------------------------------|-------------------------------------|
|                                 |                             | n                      | %    | n                          | %    |                               |                                     |
| <b>Cancer<br/>Group</b>         | $\chi^2=18.8,$<br>$p<0.001$ |                        |      |                            |      |                               |                                     |
| Breast                          |                             | 854                    | 25.9 | 394                        | 23.3 | 1248                          | 68.4                                |
| Colorectal                      |                             | 802                    | 24.3 | 446                        | 26.4 | 1248                          | 64.3                                |
| NHL                             |                             | 778                    | 23.6 | 470                        | 27.8 | 1248                          | 62.3                                |
| Prostate                        |                             | 866                    | 26.2 | 382                        | 22.5 | 1248                          | 69.4                                |
| <b>Age</b>                      | $\chi^2=108,$<br>$p<0.001$  |                        |      |                            |      |                               |                                     |
| under 55                        |                             | 467                    | 14.2 | 282                        | 16.7 | 749                           | 62.3                                |
| 55 to 64                        |                             | 692                    | 21.0 | 335                        | 19.8 | 1027                          | 67.4                                |
| 65 to 74                        |                             | 1,108                  | 33.6 | 414                        | 24.5 | 1522                          | 72.8                                |
| 75 to 84                        |                             | 835                    | 25.3 | 434                        | 25.6 | 1269                          | 65.8                                |
| 85+                             |                             | 198                    | 6.0  | 227                        | 13.4 | 425                           | 46.6                                |
| <b>IMD<br/>Category</b>         | $\chi^2=55.9,$<br>$p<0.001$ |                        |      |                            |      |                               |                                     |
| 1 least<br>deprived             |                             | 826                    | 25.0 | 331                        | 19.6 | 1157                          | 71.4                                |
| 2                               |                             | 812                    | 24.6 | 357                        | 21.1 | 1169                          | 69.5                                |
| 3                               |                             | 703                    | 21.3 | 349                        | 20.7 | 1052                          | 66.8                                |
| 4                               |                             | 554                    | 16.8 | 352                        | 20.7 | 906                           | 61.1                                |
| 5 most<br>deprived              |                             | 399                    | 12.1 | 300                        | 17.7 | 699                           | 57.1                                |
| Missing                         |                             | 6                      | 0.2  | 3                          | 0.2  | 9                             | 66.7                                |
| <b>Time since<br/>Diagnosis</b> | $\chi^2=4.1,$<br>$p=0.25$   |                        |      |                            |      |                               |                                     |
| 1 year                          |                             | 848                    | 25.7 | 400                        | 23.6 | 1248                          | 67.9                                |
| 2 years                         |                             | 834                    | 25.3 | 414                        | 24.5 | 1248                          | 66.8                                |
| 3 years                         |                             | 806                    | 24.4 | 442                        | 26.1 | 1248                          | 64.6                                |
| 5 years                         |                             | 812                    | 24.6 | 436                        | 25.8 | 1248                          | 65.1                                |



Table 1b. Demographic Data by Cancer Group

| Characteristic                         |                               | Breast<br>(n=854) |      | Colorectal<br>(n=802) |      | Non Hodgkin's<br>Lymphoma<br>(n=778) |      | Prostate<br>(n=866) |      | Total<br>(n=3300) |      |
|----------------------------------------|-------------------------------|-------------------|------|-----------------------|------|--------------------------------------|------|---------------------|------|-------------------|------|
|                                        |                               | n                 | %    | n                     | %    | n                                    | %    | n                   | %    | n                 | %    |
| Sex                                    | $\chi^2=1700$ ,<br>$p<0.001$  |                   |      |                       |      |                                      |      |                     |      |                   |      |
| Male                                   |                               | 10                | 1.2  | 435                   | 54.2 | 419                                  | 53.9 | 848                 | 97.9 | 1712              | 51.9 |
| Female                                 |                               | 829               | 97.0 | 348                   | 43.4 | 352                                  | 45.2 | 0                   | 0    | 1529              | 46.3 |
| Missing                                |                               | 15                | 1.8  | 19                    | 2.4  | 7                                    | 0.9  | 18                  | 2.1  | 59                | 1.8  |
| Age                                    | $\chi^2=401$ ,<br>$p<0.001$   |                   |      |                       |      |                                      |      |                     |      |                   |      |
| under 55                               |                               | 231               | 27.0 | 57                    | 7.1  | 157                                  | 20.2 | 157                 | 18.1 | 467               | 14.2 |
| 55 to 64                               |                               | 237               | 27.8 | 136                   | 17.0 | 173                                  | 22.2 | 173                 | 20.0 | 692               | 21.0 |
| 65 to 74                               |                               | 224               | 26.2 | 280                   | 34.9 | 238                                  | 30.6 | 238                 | 27.5 | 1,108             | 33.6 |
| 75 to 84                               |                               | 122               | 14.3 | 246                   | 30.7 | 175                                  | 22.5 | 175                 | 20.2 | 835               | 25.3 |
| 85+                                    |                               | 40                | 4.7  | 83                    | 10.3 | 35                                   | 4.5  | 35                  | 4.0  | 198               | 6.0  |
| Ethnicity                              | $\chi^2=74.6$ ,<br>$p<0.001$  |                   |      |                       |      |                                      |      |                     |      |                   |      |
| White                                  |                               | 768               | 89.9 | 740                   | 92.3 | 688                                  | 88.4 | 786                 | 90.8 | 2982              | 90.4 |
| Asian                                  |                               | 35                | 4.1  | 19                    | 2.3  | 30                                   | 3.9  | 15                  | 1.7  | 99                | 3.0  |
| Black                                  |                               | 14                | 1.6  | 11                    | 1.4  | 21                                   | 2.7  | 36                  | 4.2  | 82                | 2.5  |
| Mixed                                  |                               | 4                 | 0.5  | 5                     | 0.6  | 6                                    | 0.8  | 1                   | 0.1  | 16                | 0.5  |
| Other                                  |                               | 4                 | 0.5  | 0                     | 0    | 4                                    | 0.5  | 3                   | 0.3  | 11                | 0.3  |
| Missing                                |                               | 29                | 3.4  | 27                    | 3.4  | 29                                   | 3.7  | 25                  | 2.9  | 110               | 3.3  |
| IMD<br>Category                        | $\chi^2=4.3$ ,<br>$p=0.97$    |                   |      |                       |      |                                      |      |                     |      |                   |      |
| 1 least<br>deprived                    |                               | 211               | 24.7 | 198                   | 24.7 | 202                                  | 26.0 | 215                 | 24.8 | 826               | 25.0 |
| 2                                      |                               | 210               | 24.6 | 199                   | 24.8 | 183                                  | 23.5 | 220                 | 25.4 | 812               | 24.6 |
| 3                                      |                               | 184               | 21.5 | 159                   | 19.8 | 177                                  | 22.7 | 183                 | 21.1 | 703               | 21.3 |
| 4                                      |                               | 141               | 16.5 | 147                   | 18.3 | 125                                  | 16.1 | 141                 | 16.3 | 554               | 16.8 |
| 5 most<br>deprived                     |                               | 104               | 12.2 | 98                    | 12.2 | 91                                   | 11.7 | 106                 | 12.2 | 399               | 12.1 |
| Missing                                |                               | 4                 | 0.5  | 1                     | 0.1  | 0                                    | 0    | 1                   | 0.1  | 6                 | 0.2  |
| Time since<br>Diagnosis                | $\chi^2=5.5$ ,<br>$p=0.78$    |                   |      |                       |      |                                      |      |                     |      |                   |      |
| 1 year                                 |                               | 215               | 25.2 | 202                   | 25.2 | 197                                  | 25.3 | 234                 | 27.0 | 848               | 25.7 |
| 2 years                                |                               | 212               | 24.8 | 215                   | 26.8 | 187                                  | 24.0 | 220                 | 25.4 | 834               | 25.3 |
| 3 years                                |                               | 204               | 23.9 | 195                   | 24.3 | 207                                  | 26.6 | 200                 | 23.1 | 806               | 24.4 |
| 5 years                                |                               | 223               | 26.1 | 190                   | 23.7 | 187                                  | 24.0 | 212                 | 24.5 | 812               | 24.6 |
| Other Long<br>Term Health<br>Condition | $\chi^2=12.1$ ,<br>$p=0.06$   |                   |      |                       |      |                                      |      |                     |      |                   |      |
| Yes                                    |                               | 435               | 50.9 | 432                   | 53.9 | 435                                  | 55.9 | 501                 | 57.9 | 1803              | 54.6 |
| No                                     |                               | 353               | 41.3 | 309                   | 38.5 | 287                                  | 36.9 | 299                 | 34.5 | 1248              | 37.8 |
| Don't Know                             |                               | 30                | 6.9  | 23                    | 2.9  | 33                                   | 4.2  | 27                  | 3.1  | 113               | 3.4  |
| Missing                                |                               | 36                | 4.2  | 38                    | 4.7  | 23                                   | 3.0  | 39                  | 4.5  | 136               | 4.1  |
| Disease<br>Status                      | $\chi^2=390.0$ ,<br>$p<0.001$ |                   |      |                       |      |                                      |      |                     |      |                   |      |
| Remission                              |                               | 677               | 79.3 | 625                   | 77.9 | 526                                  | 67.6 | 399                 | 46.1 | 2227              | 67.5 |
| Rx but<br>present                      |                               | 26                | 3.0  | 32                    | 4.0  | 81                                   | 10.4 | 144                 | 16.6 | 283               | 8.6  |
| Not treated                            |                               | 4                 | 0.5  | 6                     | 0.7  | 43                                   | 5.5  | 78                  | 9.0  | 131               | 4.0  |

1  
2  
3  
4  
5  
6  
7  
8  
9  
10  
11  
12  
13  
14  
15  
16  
17  
18  
19  
20  
21  
22  
23  
24  
25  
26  
27  
28  
29  
30  
31  
32  
33  
34  
35  
36  
37  
38  
39  
40  
41  
42  
43  
44  
45  
46  
47  
48  
49  
50  
51  
52  
53  
54  
55  
56  
57  
58  
59  
60

|                   |  |    |     |    |     |    |     |     |      |     |     |
|-------------------|--|----|-----|----|-----|----|-----|-----|------|-----|-----|
| <b>Recurrence</b> |  | 30 | 3.5 | 20 | 2.5 | 30 | 3.9 | 8   | 0.9  | 88  | 2.6 |
| <b>Not sure</b>   |  | 58 | 6.8 | 69 | 8.6 | 53 | 6.8 | 140 | 16.2 | 320 | 9.7 |
| <b>Missing</b>    |  | 59 | 6.9 | 50 | 6.2 | 45 | 5.8 | 97  | 11.2 | 251 | 7.6 |

For peer review only

Table 2. EQ5D outcome category by cancer sub-group

| EQ5D Categories                  | 'High' QoL<br>(Scores=1) |      | Medium QoL<br>(0.5≤Scores<1) |      | Low QoL<br>(Scores<0.5) |      | Missing |     |
|----------------------------------|--------------------------|------|------------------------------|------|-------------------------|------|---------|-----|
|                                  | n                        | %    | n                            | %    | n                       | %    | n       | %   |
| <b>Breast</b>                    | 208                      | 24.4 | 514                          | 60.2 | 76                      | 8.9  | 56      | 6.6 |
| <b>Colorectal</b>                | 255                      | 31.2 | 434                          | 54.1 | 87                      | 10.8 | 26      | 3.2 |
| <b>Non Hodgkins<br/>Lymphoma</b> | 247                      | 31.7 | 398                          | 51.2 | 102                     | 13.1 | 31      | 4.0 |
| <b>Prostate</b>                  | 347                      | 40.0 | 390                          | 45.0 | 81                      | 9.4  | 48      | 5.5 |
| <b>Total</b>                     | 1057                     | 32.0 | 1736                         | 52.6 | 346                     | 10.5 | 161     | 4.9 |

For peer review only

Table 3a. Ordered Logistic Regression Model EQ5D in Breast Cancer Patients [n=709, pseudoR<sup>2</sup>=0.16  
p<0.001]

| Characteristic                       | Odds Ratio* | 95% CI |       | P value |
|--------------------------------------|-------------|--------|-------|---------|
| <b>Age (years)</b>                   |             |        |       |         |
| <55 years                            | REF         |        |       |         |
| 55-64                                | 0.69        | 0.45   | 1.06  | 0.09    |
| 65-74                                | 0.36        | 0.22   | 0.58  | <0.001  |
| 75-84                                | 0.59        | 0.32   | 1.08  | 0.09    |
| 85+                                  | 1.61        | 0.57   | 4.52  | 0.36    |
| <b>Deprivation</b>                   |             |        |       |         |
| 1 least deprived                     | REF         |        |       |         |
| 2                                    | 1.03        | 0.66   | 1.62  | 0.88    |
| 3                                    | 1.10        | 0.68   | 1.77  | 0.71    |
| 4                                    | 0.93        | 0.55   | 1.56  | 0.78    |
| 5 most deprived                      | 3.00        | 1.64   | 5.50  | <0.001  |
| <b>Physical Activity</b>             | 0.88        | 0.82   | 0.95  | <0.001  |
| <b>Number of other LTC (excl BP)</b> |             |        |       |         |
| 0                                    | REF         |        |       |         |
| 1                                    | 1.84        | 1.25   | 2.70  | 0.002   |
| 2+                                   | 7.30        | 4.45   | 11.93 | <0.001  |
| <b>Treatment*</b>                    |             |        |       |         |
| Radio+Chemo+Surgery+Hormone          | REF         |        |       |         |
| Radio +Chemo+Surgery                 | 0.67        | 0.38   | 1.20  | 0.18    |
| Radio+Surgery                        | 0.51        | 0.29   | 0.90  | 0.02    |
| Radio+Surgery+Hormone                | 0.56        | 0.33   | 0.96  | 0.04    |
| Surgery only                         | 1.00        | 0.55   | 1.84  | 0.99    |
| Other                                | 0.92        | 0.53   | 1.58  | 0.76    |
| <b>Ethnicity</b>                     |             |        |       |         |
| White                                | REF         |        |       |         |
| Mixed                                | 0.50        | 0.06   | 4.29  | 0.53    |
| Asian                                | 1.96        | 0.77   | 5.01  | 0.16    |
| Black                                | 0.29        | 0.08   | 0.98  | 0.05    |
| Other                                | 2.20        | 0.17   | 29.32 | 0.55    |
| <b>Disease Status</b>                |             |        |       |         |
| Remission                            | REF         |        |       |         |
| Rx but present                       | 1.49        | 0.56   | 3.93  | 0.43    |
| Not treated                          | .           | .      | .     | .       |
| Recurrence                           | 4.70        | 1.92   | 11.52 | 0.001   |
| Not sure                             | 2.51        | 1.27   | 4.96  | 0.008   |
| <b>Time since Diagnosis</b>          |             |        |       |         |
| 1 year                               | REF         |        |       |         |
| 2 years                              | 1.02        | 0.64   | 1.62  | 0.95    |
| 3 years                              | 0.88        | 0.55   | 1.41  | 0.60    |
| 5 years                              | 0.93        | 0.59   | 1.47  | 0.76    |

\*Odds of reporting 'medium' or 'low' QoL EQ5D scores compared to 'high' QoL scores where 'high', 'medium' and 'low' QoL was defined as scores=1,  $0.5 \leq \text{scores} < 1$  and  $\text{scores} < 0.5$  respectively.

Table 3b. Ordered Logistic Regression Model EQ5D in Colorectal Patients [n=485, pseudoR2=0.18, p&lt;0.001]

| Characteristic                       | Odds Ratio | 95% CI |       | P value |
|--------------------------------------|------------|--------|-------|---------|
| <b>Age (years)</b>                   |            |        |       |         |
| <55 years                            | REF        |        |       |         |
| 55-64                                | 1.28       | 0.59   | 2.75  | 0.53    |
| 65-74                                | 1.16       | 0.57   | 2.35  | 0.69    |
| 75-84                                | 1.23       | 0.57   | 2.64  | 0.59    |
| 85+                                  | 2.45       | 0.93   | 6.41  | 0.07    |
| <b>Sex</b>                           |            |        |       |         |
| Male                                 | REF        |        |       |         |
| Female                               | 1.22       | 0.81   | 1.82  | 0.34    |
| <b>Deprivation</b>                   |            |        |       |         |
| 1 least deprived                     | REF        |        |       |         |
| 2                                    | 0.83       | 0.48   | 1.43  | 0.50    |
| 3                                    | 0.57       | 0.33   | 1.00  | 0.05    |
| 4                                    | 0.62       | 0.34   | 1.13  | 0.12    |
| 5 most deprived                      | 1.17       | 0.58   | 2.34  | 0.66    |
| <b>Physical Activity</b>             | 0.83       | 0.76   | 0.90  | <0.001  |
| <b>Number of other LTC(excl BP)</b>  |            |        |       |         |
| 0                                    | REF        |        |       |         |
| 1                                    | 2.09       | 1.29   | 3.37  | <0.001  |
| 2+                                   | 4.83       | 2.85   | 8.21  | <0.001  |
| <b>Treatment*</b>                    |            |        |       |         |
| Surgery only                         | REF        |        |       |         |
| Radio+Chemo+Surgery                  | 1.15       | 0.60   | 2.21  | 0.67    |
| Chemo+Surgery                        | 1.35       | 0.85   | 2.17  | 0.21    |
| Other                                | 1.58       | 0.77   | 3.22  | 0.21    |
| <b>Ethnicity</b>                     |            |        |       |         |
| White                                | REF        |        |       |         |
| Mixed                                | 1.72       | 0.24   | 12.42 | 0.59    |
| Asian                                | 1.99       | 0.46   | 8.54  | 0.36    |
| Black                                | 1.14       | 0.26   | 4.92  | 0.86    |
| Other                                | 1.72       | 0.24   | 12.42 | 0.59    |
| <b>Disease Status</b>                |            |        |       |         |
| Remission                            | REF        |        |       |         |
| Rx but present                       | 7.03       | 2.44   | 20.21 | <0.001  |
| Not treated                          | 0.16       | 0.01   | 2.63  | 0.20    |
| Recurrence                           | 4.56       | 1.54   | 13.49 | 0.01    |
| Not sure                             | 2.67       | 1.23   | 5.79  | 0.01    |
| <b>Stoma</b>                         |            |        |       |         |
| No                                   | REF        |        |       |         |
| Yes                                  | 1.32       | 0.80   | 2.19  | 0.27    |
| <b>Difficulty Controlling Bowels</b> |            |        |       |         |
| No                                   | REF        |        |       |         |
| Yes                                  | 2.30       | 1.43   | 3.72  | <0.001  |
| <b>Leak Urine</b>                    |            |        |       |         |
| No                                   | REF        |        |       |         |
| Yes                                  | 1.41       | 0.87   | 2.30  | 0.16    |
| <b>Time since Diagnosis</b>          |            |        |       |         |
| 1 year                               | REF        |        |       |         |
| 2 years                              | 0.72       | 0.42   | 1.22  | 0.22    |
| 3 years                              | 1.03       | 0.59   | 1.81  | 0.92    |
| 5 years                              | 0.85       | 0.49   | 1.48  | 0.56    |

1  
2  
3  
4  
5  
6  
7  
8  
9  
10  
11  
12  
13  
14  
15  
16  
17  
18  
19  
20  
21  
22  
23  
24  
25  
26  
27  
28  
29  
30  
31  
32  
33  
34  
35  
36  
37  
38  
39  
40  
41  
42  
43  
44  
45  
46  
47  
48  
49  
50  
51  
52  
53  
54  
55  
56  
57  
58  
59  
60

\*Odds of reporting 'medium' or 'low' QoL EQ5D scores compared to 'high' QoL scores where 'high', 'medium' and 'low' QoL was defined as scores=1,  $0.5 \leq \text{scores} < 1$  and  $\text{scores} < 0.5$  respectively.

For peer review only

Table 3c. Ordered Logistic Regression Model EQ5D in NHL Patients [n=614, pseudoR2=0.15 p&lt;0.001]

| Characteristic                            | Odds Ratio | 95% CI |       | P value |
|-------------------------------------------|------------|--------|-------|---------|
| <b>Age (years)</b>                        |            |        |       |         |
| <55 years                                 | REF        |        |       |         |
| 55-64                                     | 0.89       | 0.55   | 1.45  | 0.65    |
| 65-74                                     | 1.23       | 0.75   | 1.99  | 0.41    |
| 75-84                                     | 1.60       | 0.94   | 2.73  | 0.08    |
| 85+                                       | 2.13       | 0.84   | 5.39  | 0.11    |
| <b>Sex</b>                                |            |        |       |         |
| Male                                      | REF        |        |       |         |
| Female                                    | 1.25       | 0.89   | 1.74  | 0.19    |
| <b>Deprivation</b>                        |            |        |       |         |
| 1 least deprived                          | REF        |        |       |         |
| 2                                         | 1.06       | 0.67   | 1.69  | 0.80    |
| 3                                         | 1.21       | 0.75   | 1.95  | 0.43    |
| 4                                         | 1.64       | 0.97   | 2.76  | 0.07    |
| 5 most deprived                           | 1.19       | 0.65   | 2.21  | 0.57    |
| Physical Activity                         | 0.91       | 0.84   | 0.98  | 0.01    |
| <b>Number of other LTC (excluding BP)</b> |            |        |       |         |
| 0                                         | REF        |        |       |         |
| 1                                         | 2.16       | 1.44   | 3.24  | <0.001  |
| 2+                                        | 7.26       | 4.51   | 11.69 | <0.001  |
| <b>Treatment*</b>                         |            |        |       |         |
| Chemo only                                | REF        |        |       |         |
| Radio+Chemo                               | 0.81       | 0.47   | 1.41  | 0.46    |
| Chemo + Antibody                          | 0.93       | 0.55   | 1.59  | 0.80    |
| Radio+Chemo+Other                         | 1.55       | 0.87   | 2.77  | 0.14    |
| Other                                     | 0.96       | 0.63   | 1.46  | 0.86    |
| <b>Ethnicity</b>                          |            |        |       |         |
| White                                     | REF        |        |       |         |
| Mixed                                     | 2.78       | 0.28   | 27.7  | 0.38    |
| Asian                                     | 0.68       | 0.29   | 1.59  | 0.38    |
| Black                                     | 0.91       | 0.33   | 2.49  | 0.85    |
| Other                                     | 0.61       | 0.09   | 4.39  | 0.62    |
| <b>Disease Status</b>                     |            |        |       |         |
| Remission                                 | REF        |        |       |         |
| Rx but present                            | 2.57       | 1.52   | 4.33  | <0.001  |
| Not treated                               | 0.83       | 0.17   | 3.96  | 0.82    |
| Recurrence                                | 3.73       | 1.68   | 8.29  | 0.001   |
| Not sure                                  | 3.04       | 1.58   | 5.84  | 0.001   |
| <b>Time since Diagnosis</b>               |            |        |       |         |
| 1 year                                    | REF        |        |       |         |
| 2 years                                   | 0.62       | 0.38   | 0.99  | 0.05    |
| 3 years                                   | 0.60       | 0.38   | 0.96  | 0.03    |
| 5 years                                   | 0.57       | 0.36   | 0.90  | 0.02    |

\*Odds of reporting 'medium' or 'low' QoL EQ5D scores compared to 'high' QoL scores where 'high', 'medium' and 'low' QoL was defined as scores=1,  $0.5 \leq \text{scores} < 1$  and  $\text{scores} < 0.5$  respectively.

Table 3d. Ordered Logistic Regression Model EQ5D in Prostate Patients [n=524, pseudoR2=0.22 p&lt;0.001]

| Characteristic                       | Odds Ratio | 95% CI |        | P value |
|--------------------------------------|------------|--------|--------|---------|
| <b>Age (years)</b>                   |            |        |        |         |
| <55 years                            | REF        |        |        |         |
| 55-64                                | 1.32       | 0.41   | 4.30   | 0.64    |
| 65-74                                | 1.72       | 0.55   | 5.38   | 0.36    |
| 75-84                                | 1.32       | 0.41   | 4.30   | 0.64    |
| 85+                                  | 1.92       | 0.42   | 8.78   | 0.40    |
| <b>Deprivation</b>                   |            |        |        |         |
| 1 least deprived                     | REF        |        |        |         |
| 2                                    | 1.09       | 0.64   | 1.85   | 0.74    |
| 3                                    | 1.19       | 0.68   | 2.08   | 0.55    |
| 4                                    | 1.61       | 0.88   | 2.95   | 0.13    |
| 5 most deprived                      | 2.57       | 1.31   | 5.04   | 0.01    |
| <b>Physical Activity</b>             | 0.82       | 0.75   | 0.88   | <0.001  |
| <b>Number of other LTC(excl BP)</b>  |            |        |        |         |
| 0                                    | REF        |        |        |         |
| 1                                    | 1.55       | 0.94   | 2.54   | 0.09    |
| 2+                                   | 4.28       | 2.62   | 7.01   | <0.001  |
| <b>Treatment*</b>                    |            |        |        |         |
| Radio+Hormone                        | REF        |        |        |         |
| Surgery only                         | 0.39       | 0.21   | 0.71   | <0.001  |
| Hormone only                         | 1.68       | 0.85   | 3.33   | 0.14    |
| Radio only                           | 0.94       | 0.53   | 1.66   | 0.83    |
| Active surveillance only             | 1.16       | 0.47   | 2.88   | 0.75    |
| Other                                | .          | .      | .      | .       |
| <b>Ethnicity</b>                     |            |        |        |         |
| White                                | REF        |        |        |         |
| Mixed                                | 3.82       | 0.07   | 203.44 | 0.51    |
| Asian                                | 3.21       | 0.56   | 18.49  | 0.19    |
| Black                                | 2.54       | 0.96   | 6.73   | 0.06    |
| Other                                | 0.00       | 0.00   | .      | 0.98    |
| <b>Disease Status</b>                |            |        |        |         |
| Remission                            | REF        |        |        |         |
| Rx but present                       | 1.75       | 0.94   | 3.26   | 0.08    |
| Not treated                          | 1.06       | 0.37   | 3.05   | 0.91    |
| Recurrence                           | 1.71       | 0.17   | 16.91  | 0.65    |
| Not sure                             | 1.48       | 0.85   | 2.58   | 0.17    |
| <b>Urinary Leakage</b>               |            |        |        |         |
| No                                   | REF        |        |        |         |
| Yes                                  | 3.52       | 2.32   | 5.35   | <0.001  |
| <b>Erectile Dysfunction</b>          |            |        |        |         |
| No                                   | REF        |        |        |         |
| Yes                                  | 1.46       | 0.96   | 2.23   | 0.08    |
| <b>Difficulty Controlling Bowels</b> |            |        |        |         |
| No                                   | REF        |        |        |         |
| Yes                                  | 1.62       | 0.90   | 2.92   | 0.10    |
| <b>Time since Diagnosis</b>          |            |        |        |         |
| 1 year                               | REF        |        |        |         |
| 2 years                              | 0.83       | 0.50   | 1.40   | 0.49    |
| 3 years                              | 0.80       | 0.47   | 1.36   | 0.41    |
| 5 years                              | 0.77       | 0.45   | 1.33   | 0.36    |



\*Odds of reporting 'medium' or 'low' QoL EQ5D scores compared to 'high' QoL scores where 'high', 'medium' and 'low' QoL was defined as scores=1,  $0.5 \leq \text{scores} < 1$  and  $\text{scores} < 0.5$  respectively.

For peer review only

Table 4. Comparison of Quality of Life scores with other population data

|                                 | Health Survey for England (HSE 2008) <sup>34</sup> |                 | GP Population Survey (GPPS) <sup>35</sup> | GP Population Survey (GPPS) <sup>35</sup> | This survey |                          |
|---------------------------------|----------------------------------------------------|-----------------|-------------------------------------------|-------------------------------------------|-------------|--------------------------|
|                                 | All ages                                           | Ages ≥ 45 years | All                                       | No LTC                                    | All         | In remission with no LTC |
| Number of respondents           | 14116                                              | 7672            | 426933                                    | 193285                                    | 3300        | 848                      |
| Median age                      | 48                                                 | 63              | 48                                        | 39                                        | 69.3        | 63.2                     |
| 'High' QOL (Scores=1)           | 56.0%                                              | 45.4%           | 50.6%                                     | 73.8%                                     | 32.0%       | 51.4%                    |
| 'Medium' QOL (0.5 ≤ Scores < 1) | 37.7%                                              | 45.6%           | 41.6%                                     | 25.2%                                     | 52.6%       | 44.3%                    |
| 'Low' QOL (Scores < 0.5)        | 6.3%                                               | 9.0%            | 7.8%                                      | 0.9%                                      | 10.5%       | 2.1%                     |

Supplementary Table 1. Quality of Life Dimension Results (EQ5D) by Cancer Sub group

| EQ5D dimension                                                 |                                | Breast<br>(n=854) |      | Colorectal<br>(n=802) |      | Non<br>Hodgkin's<br>Lymphoma<br>(n=778) |      | Prostate<br>(n=866) |      | Total<br>(n=3300) |      |
|----------------------------------------------------------------|--------------------------------|-------------------|------|-----------------------|------|-----------------------------------------|------|---------------------|------|-------------------|------|
|                                                                |                                | n                 | %    | n                     | %    | n                                       | %    | n                   | %    | n                 | %    |
| <b>Mobility</b><br>$\chi^2=51.3$ ,<br>$p<0.001$                | No Problems                    | 567               | 66.4 | 442                   | 55.1 | 427                                     | 54.9 | 535                 | 61.8 | 1971              | 59.7 |
|                                                                | Slight Problems                | 105               | 12.3 | 159                   | 19.8 | 140                                     | 18.0 | 131                 | 15.1 | 535               | 16.2 |
|                                                                | Moderate Problems              | 107               | 12.5 | 120                   | 15.0 | 120                                     | 15.4 | 97                  | 11.2 | 444               | 13.5 |
|                                                                | Severe Problems                | 46                | 5.4  | 57                    | 7.1  | 71                                      | 9.1  | 69                  | 8.0  | 243               | 7.4  |
|                                                                | Cannot walk                    | 8                 | 0.9  | 13                    | 1.6  | 6                                       | 0.8  | 4                   | 0.4  | 31                | 0.9  |
|                                                                | Missing                        | 21                | 2.5  | 11                    | 1.4  | 14                                      | 1.8  | 30                  | 3.5  | 76                | 2.3  |
| <b>Self Care</b><br>$\chi^2=30.4$ ,<br>$p=0.002$               | No Problems                    | 716               | 83.8 | 651                   | 81.2 | 611                                     | 78.5 | 704                 | 81.3 | 2682              | 81.3 |
|                                                                | Slight Problems                | 47                | 5.5  | 67                    | 8.4  | 66                                      | 8.5  | 78                  | 9.0  | 258               | 7.8  |
|                                                                | Moderate Problems              | 45                | 5.3  | 46                    | 5.7  | 71                                      | 9.1  | 44                  | 5.1  | 206               | 6.2  |
|                                                                | Severe Problems                | 12                | 1.4  | 18                    | 2.2  | 12                                      | 1.5  | 9                   | 1.0  | 51                | 1.5  |
|                                                                | Cannot wash/dress              | 6                 | 0.7  | 9                     | 1.1  | 4                                       | 0.5  | 4                   | 0.5  | 23                | 0.7  |
|                                                                | Missing                        | 28                | 3.3  | 11                    | 1.4  | 14                                      | 1.8  | 27                  | 3.1  | 80                | 2.4  |
| <b>Usual<br/>Activities</b><br>$\chi^2=34.5$ ,<br>$p<0.001$    | No Problems                    | 513               | 60.1 | 429                   | 53.5 | 411                                     | 52.8 | 533                 | 61.5 | 1886              | 57.2 |
|                                                                | Slight Problems                | 162               | 19.0 | 173                   | 21.6 | 156                                     | 20.1 | 145                 | 16.7 | 636               | 19.3 |
|                                                                | Moderate Problems              | 111               | 13.0 | 113                   | 14.1 | 127                                     | 16.3 | 104                 | 12.1 | 455               | 13.7 |
|                                                                | Severe Problems                | 31                | 3.6  | 48                    | 6.0  | 49                                      | 6.3  | 43                  | 5.0  | 171               | 5.2  |
|                                                                | Cannot do usual activities     | 14                | 1.6  | 24                    | 3.0  | 26                                      | 3.3  | 15                  | 1.7  | 79                | 2.4  |
|                                                                | Missing                        | 23                | 2.7  | 15                    | 1.8  | 9                                       | 1.2  | 26                  | 3.0  | 73                | 2.2  |
| <b>Pain</b><br>$\chi^2=134.3$ ,<br>$p<0.001$                   | No Pain                        | 329               | 38.5 | 429                   | 53.5 | 408                                     | 52.4 | 526                 | 60.7 | 1692              | 51.3 |
|                                                                | Slight Pain                    | 341               | 39.9 | 220                   | 27.4 | 180                                     | 23.1 | 169                 | 19.5 | 910               | 27.6 |
|                                                                | Moderate Pain                  | 113               | 13.2 | 92                    | 11.5 | 120                                     | 15.4 | 101                 | 11.7 | 426               | 12.9 |
|                                                                | Severe Pain                    | 39                | 4.6  | 35                    | 4.4  | 51                                      | 6.6  | 38                  | 4.4  | 163               | 4.9  |
|                                                                | Extreme Pain                   | 5                 | 0.6  | 9                     | 1.1  | 10                                      | 1.3  | 3                   | 0.3  | 27                | 0.8  |
|                                                                | Missing                        | 27                | 3.2  | 17                    | 2.1  | 9                                       | 1.2  | 29                  | 3.3  | 82                | 2.5  |
| <b>Anxiety/<br/>depression</b><br>$\chi^2=37.1$ ,<br>$p<0.001$ | No anxiety/depression          | 475               | 55.6 | 504                   | 62.8 | 464                                     | 59.6 | 566                 | 65.4 | 2009              | 60.9 |
|                                                                | Slight anxiety/depression      | 241               | 28.2 | 196                   | 24.4 | 186                                     | 23.9 | 183                 | 21.1 | 806               | 24.4 |
|                                                                | Moderate<br>anxiety/depression | 78                | 9.1  | 78                    | 9.7  | 83                                      | 10.7 | 76                  | 8.8  | 315               | 9.5  |
|                                                                | Severe anxiety/depression      | 21                | 2.5  | 6                     | 0.8  | 21                                      | 2.7  | 8                   | 0.9  | 56                | 1.7  |
|                                                                | Extreme<br>anxiety/depression  | 10                | 1.2  | 4                     | 0.5  | 8                                       | 1.0  | 4                   | 0.5  | 26                | 0.8  |
|                                                                | Missing                        | 29                | 3.4  | 14                    | 1.8  | 16                                      | 2.1  | 29                  | 3.3  | 88                | 2.7  |

1  
2  
3  
4  
5  
6  
7  
8  
9  
10  
11  
12  
13  
14  
15  
16  
17  
18  
19  
20  
21  
22  
23  
24  
25  
26  
27  
28  
29  
30  
31  
32  
33  
34  
35  
36  
37  
38  
39  
40  
41  
42  
43  
44  
45  
46  
47  
48  
49

Supplementary Table 2 Quality of Life Dimension Results (EQ5D) by time since diagnosis of cancer

|                           |                             | 1 year<br>(n=848)         |      | 2 years<br>(n=834) |      | 3 years<br>(n=806) |      | 5 years<br>(n=812) |      | Total<br>(n=3300) |      |      |
|---------------------------|-----------------------------|---------------------------|------|--------------------|------|--------------------|------|--------------------|------|-------------------|------|------|
|                           |                             | N                         | %    | N                  | %    | N                  | %    | N                  | %    | N                 | %    |      |
| <b>Mobility</b>           | No Problems                 | 521                       | 61.4 | 501                | 60.1 | 486                | 60.3 | 463                | 57.0 | 1971              | 59.7 |      |
|                           | $\chi^2=21.1, p=0.05$       | Slight Problems           | 150  | 17.7               | 123  | 14.7               | 127  | 15.8               | 135  | 16.6              | 535  | 16.2 |
|                           | Moderate Problems           | 93                        | 11.0 | 116                | 13.9 | 104                | 12.9 | 131                | 13.1 | 444               | 13.5 |      |
|                           | Severe Problems             | 62                        | 7.3  | 62                 | 7.4  | 56                 | 6.9  | 63                 | 7.8  | 243               | 7.4  |      |
|                           | Cannot walk                 | 2                         | 0.2  | 8                  | 9.6  | 13                 | 1.6  | 8                  | 1.0  | 31                | 0.9  |      |
|                           | Missing                     | 20                        | 2.4  | 24                 | 2.9  | 20                 | 2.5  | 12                 | 1.5  | 76                | 2.3  |      |
| <b>Self Care</b>          | No Problems                 | 696                       | 82.1 | 674                | 80.8 | 659                | 81.8 | 653                | 80.4 | 2682              | 81.3 |      |
|                           | $\chi^2=10.2, p=0.59$       | Slight Problems           | 59   | 6.9                | 65   | 7.8                | 61   | 7.6                | 73   | 9.0               | 258  | 7.8  |
|                           | Moderate Problems           | 57                        | 6.7  | 56                 | 6.7  | 42                 | 5.2  | 51                 | 6.3  | 206               | 6.2  |      |
|                           | Severe Problems             | 12                        | 1.4  | 12                 | 1.4  | 14                 | 1.7  | 13                 | 1.6  | 51                | 1.5  |      |
|                           | Cannot wash/dress           | 3                         | 0.4  | 4                  | 0.5  | 10                 | 1.2  | 6                  | 0.7  | 23                | 0.7  |      |
|                           | Missing                     | 21                        | 2.5  | 23                 | 2.8  | 20                 | 2.5  | 16                 | 2.0  | 80                | 2.4  |      |
| <b>Usual Activities</b>   | No Problems                 | 465                       | 54.8 | 474                | 56.8 | 465                | 57.7 | 482                | 59.4 | 1886              | 57.2 |      |
|                           | $\chi^2=13.9, p=0.31$       | Slight Problems           | 181  | 21.3               | 157  | 18.8               | 161  | 20.0               | 137  | 16.9              | 636  | 19.3 |
|                           | Moderate Problems           | 131                       | 15.4 | 112                | 13.4 | 95                 | 11.8 | 117                | 14.4 | 455               | 13.7 |      |
|                           | Severe Problems             | 35                        | 4.1  | 45                 | 5.4  | 44                 | 5.5  | 47                 | 5.8  | 171               | 5.2  |      |
|                           | Cannot do usual activities  | 18                        | 2.1  | 19                 | 2.3  | 23                 | 2.8  | 19                 | 2.3  | 79                | 2.4  |      |
|                           | Missing                     | 18                        | 2.1  | 27                 | 3.2  | 18                 | 2.2  | 10                 | 1.2  | 73                | 2.2  |      |
| <b>Pain</b>               | No Pain                     | 421                       | 49.6 | 412                | 49.4 | 435                | 54.0 | 424                | 52.2 | 1692              | 51.3 |      |
|                           | $\chi^2=18.0, p=0.12$       | Slight Pain               | 262  | 30.9               | 237  | 28.4               | 198  | 24.6               | 213  | 26.2              | 910  | 27.6 |
|                           | Moderate Pain               | 101                       | 11.9 | 112                | 13.4 | 105                | 13.0 | 108                | 13.3 | 426               | 12.9 |      |
|                           | Severe Pain                 | 34                        | 4.0  | 44                 | 5.3  | 38                 | 4.7  | 47                 | 5.8  | 163               | 4.9  |      |
|                           | Extreme Pain                | 7                         | 0.8  | 6                  | 0.7  | 11                 | 1.4  | 3                  | 0.4  | 27                | 0.8  |      |
|                           | Missing                     | 23                        | 2.7  | 23                 | 2.8  | 19                 | 2.4  | 17                 | 2.1  | 82                | 2.5  |      |
| <b>Anxiety/depression</b> | No anxiety/depression       | 466                       | 55.0 | 505                | 60.6 | 499                | 61.9 | 539                | 66.4 | 2009              | 60.9 |      |
|                           | $\chi^2=25.8, p=0.01$       | Slight anxiety/depression | 244  | 28.8               | 195  | 23.4               | 196  | 24.3               | 171  | 21.1              | 806  | 24.4 |
|                           | Moderate anxiety/depression | 88                        | 10.4 | 86                 | 10.3 | 68                 | 8.4  | 73                 | 9.0  | 315               | 9.5  |      |
|                           | Severe anxiety/depression   | 20                        | 2.4  | 13                 | 1.5  | 13                 | 1.6  | 10                 | 1.2  | 56                | 1.7  |      |
|                           | Extreme anxiety/depression  | 6                         | 0.7  | 8                  | 1.0  | 6                  | 0.7  | 6                  | 0.7  | 26                | 0.8  |      |
|                           | Missing                     | 24                        | 2.8  | 27                 | 3.2  | 24                 | 3.0  | 13                 | 1.6  | 88                | 2.7  |      |

Supplementary Table 3. EQ5D outcome category by the number of Long Term Conditions (LTC) in patients in remission

| EQ5D Categories | High QoL (Scores=1) |             | Medium QoL (0.5≤Scores<1) |             | Low QoL (Scores<0.5) |            | Missing   |            | Total        |
|-----------------|---------------------|-------------|---------------------------|-------------|----------------------|------------|-----------|------------|--------------|
|                 | n                   | %           | n                         | %           | n                    | %          | n         | %          |              |
| No LTC          | 436                 | 51.4        | 376                       | 44.3        | 18                   | 2.1        | 18        | 2.1        | 848          |
| 1 LTC           | 250                 | 36.2        | 378                       | 54.7        | 40                   | 5.8        | 23        | 3.3        | 691          |
| ≥2 LTC          | 129                 | 18.8        | 419                       | 60.9        | 119                  | 17.3       | 21        | 3.1        | 688          |
| <b>Total</b>    | <b>815</b>          | <b>36.6</b> | <b>1,173</b>              | <b>52.7</b> | <b>177</b>           | <b>7.9</b> | <b>62</b> | <b>2.8</b> | <b>2,227</b> |

Supplementary Table 4. EQ5D outcome category by the number of Long Term Conditions (LTC) in patients not in remission

| EQ5D Categories | High QoL (Scores=1) |             | Medium QoL (0.5≤Scores<1) |             | Low QoL (Scores<0.5) |             | Missing   |            | Total      |
|-----------------|---------------------|-------------|---------------------------|-------------|----------------------|-------------|-----------|------------|------------|
|                 | n                   | %           | n                         | %           | n                    | %           | n         | %          |            |
| No LTC          | 79                  | 33.9        | 130                       | 55.8        | 15                   | 6.4         | 9         | 3.9        | 233        |
| 1 LTC           | 64                  | 23.1        | 175                       | 63.2        | 25                   | 9.0         | 13        | 4.7        | 277        |
| ≥2 LTC          | 37                  | 11.9        | 166                       | 53.2        | 94                   | 30.1        | 15        | 4.8        | 312        |
| <b>Total</b>    | <b>180</b>          | <b>21.9</b> | <b>471</b>                | <b>57.3</b> | <b>134</b>           | <b>16.3</b> | <b>37</b> | <b>4.5</b> | <b>822</b> |

Supplementary Table 5. Fear of Dying and Recurrence of Disease by Time since Diagnosis

| Fear of Dying             | Yes%         |             | No           |             | Missing    |            | Total        |
|---------------------------|--------------|-------------|--------------|-------------|------------|------------|--------------|
|                           | n            | %           | n            | %           | n          | %          |              |
| 1 year ago                | 256          | 30.2        | 542          | 63.9        | 50         | 5.9        | 848          |
| 2 years ago               | 233          | 27.9        | 543          | 65.1        | 58         | 7.0        | 834          |
| 3 years ago               | 214          | 26.6        | 531          | 65.9        | 61         | 7.6        | 806          |
| 5 years ago               | 180          | 22.2        | 583          | 71.8        | 49         | 6.0        | 812          |
| <b>Total</b>              | <b>883</b>   | <b>26.8</b> | <b>2,199</b> | <b>66.6</b> | <b>218</b> | <b>6.6</b> | <b>3,300</b> |
| <b>Fear of Recurrence</b> | <b>n</b>     | <b>%</b>    | <b>n</b>     | <b>%</b>    | <b>n</b>   | <b>%</b>   |              |
| 1 year ago                | 437          | 51.5        | 369          | 43.5        | 42         | 5.0        | 848          |
| 2 years ago               | 403          | 48.3        | 398          | 47.7        | 33         | 4.0        | 834          |
| 3 years ago               | 376          | 46.7        | 384          | 47.6        | 46         | 5.7        | 806          |
| 5 years ago               | 345          | 42.5        | 427          | 52.6        | 40         | 4.9        | 812          |
| <b>Total</b>              | <b>1,561</b> | <b>47.3</b> | <b>1,578</b> | <b>47.8</b> | <b>161</b> | <b>4.9</b> | <b>3,300</b> |

1  
2  
3  
4  
5  
6  
7  
8  
9  
10  
11  
12  
13  
14  
15  
16  
17  
18  
19  
20  
21  
22  
23  
24  
25  
26  
27  
28  
29  
30  
31  
32  
33  
34  
35  
36  
37  
38  
39  
40  
41  
42  
43  
44  
45  
46  
47  
48  
49

Supplementary Figure 1. Distribution of EQ5D summary scores by cancer sub-type

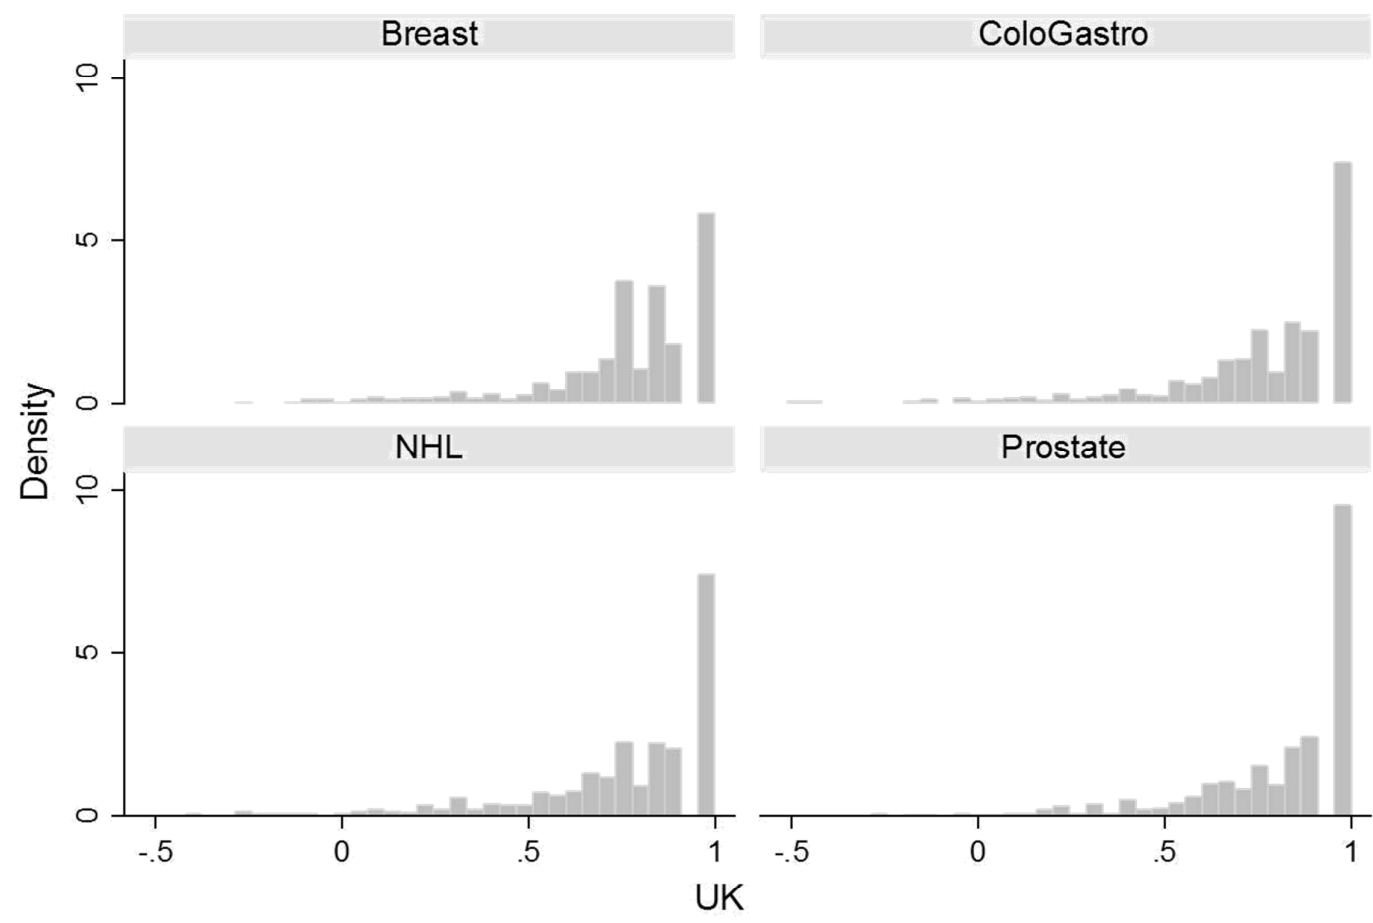

Graphs by tumour group

## References

1. Maddams J, Brewster D, Gavin A, Steward J, Elliott J, Utley M, et al. Cancer prevalence in the United Kingdom: estimates for 2008. *British Journal of Cancer* 2009;101(3):541-47.
2. Elliott J, Fallows A, Staetsky L, Smith PWF, Foster CL, Maher EJ, et al. The health and well-being of cancer survivors in the UK: findings from a population-based survey. *British Journal of Cancer* 2011;105:S11-S20.
3. Lipscomb J, Gotay CC, Snyder CE. Patient-reported outcomes in cancer: A review of recent research and policy initiatives. *Ca-a Cancer Journal for Clinicians* 2007;57(5):278-300.
4. Richards M, Corner J, Maher J. The National Cancer Survivorship Initiative: new and emerging evidence on the ongoing needs of cancer survivors. *British Journal of Cancer* 2011;105:S1-S4.
5. Garcia SF, Cella D, Clauser SB, Flynn KE, Lad T, Lai J-S, et al. Standardizing patient-reported outcomes assessment in cancer clinical trials: A patient-reported outcomes measurement information system initiative. *Journal of Clinical Oncology* 2007;25(32):5106-12.
6. Bode RK, Hahn EA, DeVellis R, Cella D, Patient-Reported Outcomes M. Measuring Participation: The Patient-Reported Outcomes Measurement Information System Experience. *Archives of Physical Medicine and Rehabilitation* 2010;91(9):S60-S65.
7. van de Poll-Franse LV, Horevoorts N, van Eenbergen M, Denollet J, Roukema JA, Aaronson NK, et al. The Patient Reported Outcomes Following Initial treatment and Long term Evaluation of Survivorship registry: Scope, rationale and design of an infrastructure for the study of physical and psychosocial outcomes in cancer survivorship cohorts. *European Journal of Cancer* 2011;47(14):2188-94.
8. Den Oudsten BL, Traa MJ, Thong MSY, Martijn H, De Hingh IHJT, Bosscha K, et al. Higher prevalence of sexual dysfunction in colon and rectal cancer survivors compared with the normative population: A population-based study. *European Journal of Cancer* 2012;In Press.
9. Hoffman RM, Hunt WC, Gilliland FD, Stephenson RA, Potosky AL. Patient satisfaction with treatment decisions for clinically localized prostate carcinoma. Results from the prostate cancer outcomes study. *Cancer* 2003;97(7):1653-62.
10. Potosky AL, Davis WW, Hoffman RM, Stanford JL, Stephenson RA, Penson DF, et al. Five-year outcomes after prostatectomy or radiotherapy for prostate cancer: The prostate cancer outcomes study. *Journal of the National Cancer Institute* 2004;96(18):1358-67.
11. Ayanian JZ, Zaslavsky AM, Arora NK, Kahn KL, Malin JL, Ganz PA, et al. Patients' Experiences With Care for Lung Cancer and Colorectal Cancer: Findings From the Cancer Care Outcomes Research and Surveillance Consortium. *Journal of Clinical Oncology* 2010;28(27):4154-61.
12. Department of Health. National Cancer Patient Experience Survey Programme - 2010 National Survey Report, 2010.
13. Davies N, Gibbons E, Mackintosh A, Fitzpatrick R. A Structured Review of Patient Reported Outcomes Measures (PROMS) for Breast Cancer, Report to the Department of Health. In: Patient Reported Outcomes Measurement Group, editor. Oxford, 2009.

14. Morris C, Gibbons E, Fitzpatrick R. A Structured Review of Patient Reported Outcome Measures (PROMS) for Prostate Cancer, Report to the Department of Health. In: Patient-Reported Outcomes Measurement Group, editor. Oxford, 2009.
15. Hadi M, Gibbons E, Fitzpatrick R. A Structured Review of Patient Reported Outcome Measures (PROMS) for Colorectal Cancer, Report to the Department of Health. In: Group PROM, editor. Oxford, 2009.
16. The Department of Health. UK Physical Activity Guidelines, 2011.
17. The EuroQol Group. EuroQol-a new facility for the measurement of health-related quality of life. *Health Policy* 1990;16(3):199-208.
18. Herdman M, Gudex C, Lloyd A, Janssen M, Kind P, Parkin D, et al. Development and preliminary testing of the new five-level version of EQ-5D (EQ-5D-5L). *Quality of Life Research* 2011;20:1727–36.
19. Wright EP, Kiely M, Johnston C, Smith AB, Cull A, Selby PJ. Development and evaluation of an instrument to assess social difficulties in routine oncology practice. *Quality of Life Research* 2005;14(2):373-86.
20. Wright P, Smith A, Brown S, Brown J, Roberts K. Measuring social difficulties: Clinical meaning and utility of the Social Difficulties Inventory (SDI). *Psycho-Oncology* 2006;15(2):S436-S37.
21. Wright P, Smith AB, Keding A, Velikova G. The Social Difficulties Inventory (SDI): development of subscales and scoring guidance for staff. *Psycho-Oncology* 2011;20(1):36-43.
22. Sheldon H, Sizmur S. An evaluation of the National Cancer Survivorship Initiative test community projects: Picker Institute Europe, 2010.
23. Girgis A, Lambert S, Lecathelinais C. The supportive care needs survey for partners and caregivers of cancer survivors: development and psychometric evaluation. *Psycho-Oncology* 2011;20(4):387-93.
24. Ashley L, Jones H, Thomas J, Forman D, Newsham A, Morris E, et al. Integrating cancer survivors' experiences into UK cancer registries: design and development of the ePOCS system (electronic Patient-reported Outcomes from Cancer Survivors). *British Journal of Cancer* 2011;105:S74-S81.
25. FACIT. Functional Assessment of Chronic Illness Therapy.
26. Department for Communities and Local Government. English Indices of Multiple Deprivation 2010: Crown copyright, 2011.
27. The EUROQOL Group. Interim Scoring for the EQ-5D-5L: Mapping the EQ-5D-5L to EQ-5D-3L VALUE SETS, 2011.
28. Judd CM, McLelland GH, Ryan CS. *Data Analysis: A Model Comparison Approach*. Second ed: Routledge, 2008.
29. National Patient Safety Agency. Defining research – guidance from NRES, 2010.
30. Ganz PA, Land SR, Antonio C, Zheng P, Yothers G, Petersen L, et al. Cancer survivorship research: the challenge of recruiting adult long term cancer survivors from a cooperative clinical trials group. *Journal of Cancer Survivorship-Research and Practice* 2009;3(3):137-47.
31. Moller H, Richards S, Hanchett N, Riaz SP, Luechtenborg M, Holmberg L, et al. Completeness of case ascertainment and survival time error in English cancer registries: impact on 1-year survival estimates. *British Journal of Cancer* 2011;105(1):170-76.



- 1  
2  
3 32. King MT, Viney R, Smith DP, Hossain I, Street D, Savage E, et al. Survival gains needed to  
4 offset persistent adverse treatment effects in localised prostate cancer. *British*  
5 *Journal of Cancer* 2012;106(4):638-45.  
6  
7 33. Markland AD, Goode PS, Redden DT, Borrud LG, Burgio KL. Prevalence of Urinary  
8 Incontinence in Men: Results From the National Health and Nutrition Examination  
9 Survey. *Journal of Urology* 2010;184(3):1022-27.  
10 34. The Health and Social Care Information Centre. The Health Survey for England 2008. In:  
11 Craig R, editor, 2009.  
12 35. The Department of Health. The GP Patient Survey, 2012.  
13 36. Eakin EG, Youlden DR, Baade PD, Lawler SP, Reeves MM, Heyworth JS, et al. Health  
14 status of long-term cancer survivors: Results from an Australian population-based  
15 sample. *Cancer Epidemiology Biomarkers & Prevention* 2006;15(10):1969-76.  
16 37. Kenfield SA, Stampfer MJ, Giovannucci E, Chan JM. Physical Activity and Survival After  
17 Prostate Cancer Diagnosis in the Health Professionals Follow-Up Study. *Journal of*  
18 *Clinical Oncology* 2011;29(6):726-32.  
19 38. Barbieri JM, Greenberg DC, Wright KA, Brown CH, Palmer C, Neal DE, et al. The  
20 association of diagnosis in the private or NHS sector on prostate cancer stage and  
21 treatment. *Journal of Public Health* 2012;34(1):108-14.  
22 39. The Department of Health. NHS Outcomes Framework 2012-13, 2011.  
23  
24  
25  
26  
27  
28  
29  
30  
31  
32  
33  
34  
35  
36  
37  
38  
39  
40  
41  
42  
43  
44  
45  
46  
47  
48  
49  
50  
51  
52  
53  
54  
55  
56  
57  
58  
59  
60

**Supplementary File 1**                      **ICD10 Codes included in the Study**

Breast Cancer                                      ICD10 Codes C50 & D05

Colorectal/Lower G.I.                              ICD10 Codes C18, C19, C20, and C21

Non-Hodgkin's Lymphoma                      ICD10 Codes C82, C83, C84 & C85

Prostate                                              ICD10 Code C61

For peer review only

1  
2  
3  
4  
5  
6  
7  
8  
9  
10  
11  
12  
13  
14  
15  
16  
17  
18  
19  
20  
21  
22  
23  
24  
25  
26  
27  
28  
29  
30  
31  
32  
33  
34  
35  
36  
37  
38  
39  
40  
41  
42  
43  
44  
45  
46  
47  
48  
49  
50  
51  
52  
53  
54  
55  
56  
57  
58  
59  
60

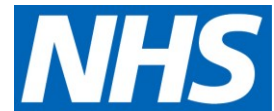

## Living with and beyond Breast Cancer

This questionnaire is about your health and quality of life since being diagnosed with your cancer. Its purpose is to provide information which can help the NHS monitor and improve the quality of health services for future patients.

### Who should complete the questionnaire?

The questions should be answered by the person named in the letter enclosed with this questionnaire. If that person needs help to complete the questionnaire, the answers should be given from their point of view – not the point of view of the person who is helping.

### Completing the questionnaire

For each question please tick clearly inside the box that is closest to your views using a black or blue pen. Don't worry if you make a mistake; simply cross out the mistake and put a tick in the correct box. Please **do not** write your name or address anywhere on the questionnaire.

### IMPORTANT INFORMATION

To make sure the information we collect is useful, we need to collect some personal details from you and to access information held about you in other NHS databases. The purpose of collecting this information is to generate aggregated statistics about the quality of life for people who are living with and beyond cancer. These statistics will be used to compare the differences in quality of life for people treated for different types of cancer by different providers and to understand what may be causing these. The results will be used to measure and improve the quality of healthcare services.

**By completing this questionnaire you are giving your consent for the information provided to be used for the above purposes. Specifically, you are agreeing that:**

- Your personal details and relevant health information can be held and used by an organisation contracted to the Department of Health to analyse the data
- Other information about you held by the Patient Demographics Service, the Secondary Users Service, Cancer Registries and other NHS databases can be held and used by an organisation contracted to the Department of Health to analyse the data
- Your personal details can be used to send you related follow-up questionnaires in the future

Your personal information will be handled securely and anonymised after analysis and before any publication.

Your personal information will not be released by the Department of Health or third party organisations working on its behalf unless required by law or where there is a clear overriding public interest.

You can withdraw the information you give the NHS in this questionnaire upon request, up to the point at which data are analysed and personal details removed.

If you have any queries about the questionnaire,  
please call the FREEPHONE helpline number on **0800 783 1775**

**Taking part in this survey is voluntary**  
**Published reports will not contain any personal details**

## YOUR HEALTH TODAY

*The questions in this section are all about your health and how you feel on the day you complete this questionnaire.*

1. What treatments have you received for your breast cancer? **(Tick all that apply)**

- 1  Radiotherapy
- 2  Chemotherapy (excluding hormone treatment)
- 3  Hormone treatment
- 4  Surgery

2. How long is it since you completed your **initial treatment** for breast cancer? *Treatment includes any chemotherapy, radiotherapy, or surgery for your breast cancer. When answering this question please do not include hormone treatments such as Tamoxifen.*

- 1  I am still having my initial treatment
- 2  It is less than 3 months since my initial treatment
- 3  It is between 3 and 12 months since my initial treatment
- 4  It is between 1 and 5 years since my initial treatment
- 5  It is more than 5 years since my initial treatment
- 6  Don't know / can't remember

3. How has your breast cancer responded to treatment?

- 1  My breast cancer has responded fully to treatment (I am in remission)
- 2  My breast cancer has been treated but is still present
- 3  My breast cancer has not been treated at all
- 4  My breast cancer has come back after it was originally treated
- 5  I am not certain what is happening with my breast cancer

4. If you have had breast surgery, do any of the following apply to you? **(Tick all that apply)**

- 1  I have had a lumpectomy
- 2  I have had a mastectomy
- 3  I have had breast reconstruction
- 4  I am awaiting or considering breast reconstruction
- 5  None of these apply to me

# YOUR HEALTH TODAY

Under each heading, please tick the ONE box that best describes your health TODAY.

## 5. MOBILITY

- I have no problems in walking about <sub>1</sub>
- I have slight problems in walking about <sub>2</sub>
- I have moderate problems in walking about <sub>3</sub>
- I have severe problems in walking about <sub>4</sub>
- I am unable to walk about <sub>5</sub>

## 6. SELF CARE

- I have no problems washing or dressing myself <sub>1</sub>
- I have slight problems washing or dressing myself <sub>2</sub>
- I have moderate problems washing or dressing myself <sub>3</sub>
- I have severe problems washing or dressing myself <sub>4</sub>
- I am unable to wash or dress myself <sub>5</sub>

## 7. USUAL ACTIVITIES (*work, study, housework, family or leisure activities*)

- I have no problems doing my usual activities <sub>1</sub>
- I have slight problems doing my usual activities <sub>2</sub>
- I have moderate problems doing my usual activities <sub>3</sub>
- I have severe problems doing my usual activities <sub>4</sub>
- I am unable to do my usual activities <sub>5</sub>

## 8. PAIN / DISCOMFORT

- I have no pain or discomfort <sub>1</sub>
- I have slight pain or discomfort <sub>2</sub>
- I have moderate pain or discomfort <sub>3</sub>
- I have severe pain or discomfort <sub>4</sub>
- I have extreme pain or discomfort <sub>5</sub>

## 9. ANXIETY / DEPRESSION

- I am not anxious or depressed <sub>1</sub>
- I am slightly anxious or depressed <sub>2</sub>
- I am moderately anxious or depressed <sub>3</sub>
- I am severely anxious or depressed <sub>4</sub>
- I am extremely anxious or depressed <sub>5</sub>

## YOUR HEALTH AND WELLBEING IN THE LAST 7 DAYS

*The questions in this section are about your health and how you have felt in the past 7 days.*

Please mark one box per line to give your response.

| <i>During the past 7 days:</i>                                                                                                                                                                                                                                                                                                                                | <b>Not at<br/>all</b>      | <b>A little<br/>bit</b>    | <b>Some-<br/>what</b>      | <b>Quite<br/>a bit</b>     | <b>Very<br/>much</b>       |                            |                            |                            |
|---------------------------------------------------------------------------------------------------------------------------------------------------------------------------------------------------------------------------------------------------------------------------------------------------------------------------------------------------------------|----------------------------|----------------------------|----------------------------|----------------------------|----------------------------|----------------------------|----------------------------|----------------------------|
| 10. I have been short of breath                                                                                                                                                                                                                                                                                                                               | 1 <input type="checkbox"/> | 2 <input type="checkbox"/> | 3 <input type="checkbox"/> | 4 <input type="checkbox"/> | 5 <input type="checkbox"/> |                            |                            |                            |
| 11. I am self conscious about the way I dress                                                                                                                                                                                                                                                                                                                 | 1 <input type="checkbox"/> | 2 <input type="checkbox"/> | 3 <input type="checkbox"/> | 4 <input type="checkbox"/> | 5 <input type="checkbox"/> |                            |                            |                            |
| 12. One or both of my arms are swollen or tender                                                                                                                                                                                                                                                                                                              | 1 <input type="checkbox"/> | 2 <input type="checkbox"/> | 3 <input type="checkbox"/> | 4 <input type="checkbox"/> | 5 <input type="checkbox"/> |                            |                            |                            |
| 13. I feel sexually attractive                                                                                                                                                                                                                                                                                                                                | 1 <input type="checkbox"/> | 2 <input type="checkbox"/> | 3 <input type="checkbox"/> | 4 <input type="checkbox"/> | 5 <input type="checkbox"/> |                            |                            |                            |
| 14. I am bothered by hair loss                                                                                                                                                                                                                                                                                                                                | 1 <input type="checkbox"/> | 2 <input type="checkbox"/> | 3 <input type="checkbox"/> | 4 <input type="checkbox"/> | 5 <input type="checkbox"/> |                            |                            |                            |
| 15. I worry that other members of my family might someday get the same illness I have                                                                                                                                                                                                                                                                         | 1 <input type="checkbox"/> | 2 <input type="checkbox"/> | 3 <input type="checkbox"/> | 4 <input type="checkbox"/> | 5 <input type="checkbox"/> |                            |                            |                            |
| 16. I worry about the effect of stress on my illness                                                                                                                                                                                                                                                                                                          | 1 <input type="checkbox"/> | 2 <input type="checkbox"/> | 3 <input type="checkbox"/> | 4 <input type="checkbox"/> | 5 <input type="checkbox"/> |                            |                            |                            |
| 17. I am bothered by a change in weight                                                                                                                                                                                                                                                                                                                       | 1 <input type="checkbox"/> | 2 <input type="checkbox"/> | 3 <input type="checkbox"/> | 4 <input type="checkbox"/> | 5 <input type="checkbox"/> |                            |                            |                            |
| 18. I have certain parts of my body where I experience pain                                                                                                                                                                                                                                                                                                   | 1 <input type="checkbox"/> | 2 <input type="checkbox"/> | 3 <input type="checkbox"/> | 4 <input type="checkbox"/> | 5 <input type="checkbox"/> |                            |                            |                            |
| 19. In the <b>past week</b> , on how many days have you done a total of 30 minutes or more of physical activity, which was enough to raise your heart rate? <i>This may include sport, exercise and brisk walking or cycling for recreation or to get to and from places, but should not include housework or physical activity that is part of your job.</i> |                            |                            |                            |                            |                            |                            |                            |                            |
|                                                                                                                                                                                                                                                                                                                                                               | <b>None</b>                | <b>1 day</b>               | <b>2 days</b>              | <b>3 days</b>              | <b>4 days</b>              | <b>5 days</b>              | <b>6 days</b>              | <b>7 days</b>              |
|                                                                                                                                                                                                                                                                                                                                                               | 1 <input type="checkbox"/> | 2 <input type="checkbox"/> | 3 <input type="checkbox"/> | 4 <input type="checkbox"/> | 5 <input type="checkbox"/> | 6 <input type="checkbox"/> | 7 <input type="checkbox"/> | 8 <input type="checkbox"/> |

# YOUR HEALTH AND WELL BEING IN THE LAST MONTH

**The questions in this section are about your health and how you have felt during the past month.**

Sometimes people who have, or have had cancer find that they have a number of everyday difficulties to cope with following their diagnosis. These might be to do with things like their family life, social activities, finances and work.

**Please tick the response that best describes your answer.**

| <i>During the past month:</i>                                                                                                                 | No difficulty              | A little                   | Quite a bit                | Very much                  | Does not apply             |
|-----------------------------------------------------------------------------------------------------------------------------------------------|----------------------------|----------------------------|----------------------------|----------------------------|----------------------------|
| 20. Have you had any difficulty in maintaining your independence?                                                                             | 1 <input type="checkbox"/> | 2 <input type="checkbox"/> | 3 <input type="checkbox"/> | 4 <input type="checkbox"/> | 5 <input type="checkbox"/> |
| 21. Have you had any difficulty in carrying out your domestic chores? (e.g. cleaning, gardening, cooking, shopping)                           | 1 <input type="checkbox"/> | 2 <input type="checkbox"/> | 3 <input type="checkbox"/> | 4 <input type="checkbox"/> | 5 <input type="checkbox"/> |
| 22. Have you had any difficulty with managing your own personal care? (e.g. bathing, dressing, washing)                                       | 1 <input type="checkbox"/> | 2 <input type="checkbox"/> | 3 <input type="checkbox"/> | 4 <input type="checkbox"/> | 5 <input type="checkbox"/> |
| 23. Have you had any difficulty with looking after those who depend on you? (e.g. children, dependent adults, pets)                           | 1 <input type="checkbox"/> | 2 <input type="checkbox"/> | 3 <input type="checkbox"/> | 4 <input type="checkbox"/> | 5 <input type="checkbox"/> |
| 24. Have any of those close to you (e.g. partner, children, parents) had any difficulty with the support available to them?                   | 1 <input type="checkbox"/> | 2 <input type="checkbox"/> | 3 <input type="checkbox"/> | 4 <input type="checkbox"/> | 5 <input type="checkbox"/> |
| 25. Have you had any difficulty with benefits? (e.g. statutory sick pay, attendance allowance, disability living allowance)                   | 1 <input type="checkbox"/> | 2 <input type="checkbox"/> | 3 <input type="checkbox"/> | 4 <input type="checkbox"/> | 5 <input type="checkbox"/> |
| 26. Have you had any financial difficulties?                                                                                                  | 1 <input type="checkbox"/> | 2 <input type="checkbox"/> | 3 <input type="checkbox"/> | 4 <input type="checkbox"/> | 5 <input type="checkbox"/> |
| 27. Have you had any difficulty with financial services? (e.g. loans, mortgages, pensions, insurance)                                         | 1 <input type="checkbox"/> | 2 <input type="checkbox"/> | 3 <input type="checkbox"/> | 4 <input type="checkbox"/> | 5 <input type="checkbox"/> |
| 28. Have you had any difficulty concerning your work? (or education if you are a student)                                                     | 1 <input type="checkbox"/> | 2 <input type="checkbox"/> | 3 <input type="checkbox"/> | 4 <input type="checkbox"/> | 5 <input type="checkbox"/> |
| 29. Have you had any difficulty with planning for your own or your family's future? (e.g. care of dependents, legal issues, business affairs) | 1 <input type="checkbox"/> | 2 <input type="checkbox"/> | 3 <input type="checkbox"/> | 4 <input type="checkbox"/> | 5 <input type="checkbox"/> |



# YOUR HEALTH AND WELL BEING IN THE LAST MONTH

| <i>During the past month:</i>                                                                                           | No<br>difficulty           | A little                   | Quite<br>a bit             | Very<br>much               | Does<br>not<br>apply       |
|-------------------------------------------------------------------------------------------------------------------------|----------------------------|----------------------------|----------------------------|----------------------------|----------------------------|
| 30. Have you had any difficulty with communicating with those closest to you? (e.g. partner, children, parents)         | 1 <input type="checkbox"/> | 2 <input type="checkbox"/> | 3 <input type="checkbox"/> | 4 <input type="checkbox"/> | 5 <input type="checkbox"/> |
| 31. Have you had any difficulty with communicating with others? (e.g. friends, neighbours, colleagues, dates)           | 1 <input type="checkbox"/> | 2 <input type="checkbox"/> | 3 <input type="checkbox"/> | 4 <input type="checkbox"/> | 5 <input type="checkbox"/> |
| 32. Have you had any difficulty concerning sexual matters?                                                              | 1 <input type="checkbox"/> | 2 <input type="checkbox"/> | 3 <input type="checkbox"/> | 4 <input type="checkbox"/> | 5 <input type="checkbox"/> |
| 33. Have you had any difficulty concerning plans to have a family?                                                      | 1 <input type="checkbox"/> | 2 <input type="checkbox"/> | 3 <input type="checkbox"/> | 4 <input type="checkbox"/> | 5 <input type="checkbox"/> |
| 34. Have you had any difficulty concerning your appearance or body image?                                               | 1 <input type="checkbox"/> | 2 <input type="checkbox"/> | 3 <input type="checkbox"/> | 4 <input type="checkbox"/> | 5 <input type="checkbox"/> |
| 35. Have you felt isolated?                                                                                             | 1 <input type="checkbox"/> | 2 <input type="checkbox"/> | 3 <input type="checkbox"/> | 4 <input type="checkbox"/> | 5 <input type="checkbox"/> |
| 36. Have you had any difficulty with getting around? (e.g. transport, car parking, your mobility)                       | 1 <input type="checkbox"/> | 2 <input type="checkbox"/> | 3 <input type="checkbox"/> | 4 <input type="checkbox"/> | 5 <input type="checkbox"/> |
| 37. Have you had any difficulty with where you live? (e.g. space, access, damp, heating, neighbours, security)          | 1 <input type="checkbox"/> | 2 <input type="checkbox"/> | 3 <input type="checkbox"/> | 4 <input type="checkbox"/> | 5 <input type="checkbox"/> |
| 38. Have you had any difficulty in carrying out your recreational activities? (e.g. hobbies, pastimes, social pursuits) | 1 <input type="checkbox"/> | 2 <input type="checkbox"/> | 3 <input type="checkbox"/> | 4 <input type="checkbox"/> | 5 <input type="checkbox"/> |
| 39. Have you had any difficulty with your plans to travel or take a holiday?                                            | 1 <input type="checkbox"/> | 2 <input type="checkbox"/> | 3 <input type="checkbox"/> | 4 <input type="checkbox"/> | 5 <input type="checkbox"/> |
| 40. Have you had any difficulty with any other area of your everyday life?                                              | 1 <input type="checkbox"/> | 2 <input type="checkbox"/> | 3 <input type="checkbox"/> | 4 <input type="checkbox"/> | 5 <input type="checkbox"/> |



# YOUR HEALTH AND WELL BEING IN THE LAST MONTH

*The questions in this section are about your health and how you have felt during the past month.*

Please tick the response that best describes your answer.

|                                              | Strongly agree             | Agree                      | Neither agree nor disagree | Disagree                   | Strongly disagree          | Does not apply to me       |
|----------------------------------------------|----------------------------|----------------------------|----------------------------|----------------------------|----------------------------|----------------------------|
| 41. I have fears about my cancer spreading   | 1 <input type="checkbox"/> | 2 <input type="checkbox"/> | 3 <input type="checkbox"/> | 5 <input type="checkbox"/> | 5 <input type="checkbox"/> | 6 <input type="checkbox"/> |
| 42. I have fears about my cancer coming back | 1 <input type="checkbox"/> | 2 <input type="checkbox"/> | 3 <input type="checkbox"/> | 5 <input type="checkbox"/> | 5 <input type="checkbox"/> | 6 <input type="checkbox"/> |
| 43. I have fears about death and dying       | 1 <input type="checkbox"/> | 2 <input type="checkbox"/> | 3 <input type="checkbox"/> | 5 <input type="checkbox"/> | 5 <input type="checkbox"/> |                            |
| 44. I experience memory loss                 | 1 <input type="checkbox"/> | 2 <input type="checkbox"/> | 3 <input type="checkbox"/> | 5 <input type="checkbox"/> | 5 <input type="checkbox"/> |                            |
| 45. I have trouble sleeping                  | 1 <input type="checkbox"/> | 2 <input type="checkbox"/> | 3 <input type="checkbox"/> | 5 <input type="checkbox"/> | 5 <input type="checkbox"/> |                            |
| 46. I have trouble concentrating             | 1 <input type="checkbox"/> | 2 <input type="checkbox"/> | 3 <input type="checkbox"/> | 5 <input type="checkbox"/> | 5 <input type="checkbox"/> |                            |
| 47. I always feel tired                      | 1 <input type="checkbox"/> | 2 <input type="checkbox"/> | 3 <input type="checkbox"/> | 5 <input type="checkbox"/> | 5 <input type="checkbox"/> |                            |
| 48. I experience mood swings                 | 1 <input type="checkbox"/> | 2 <input type="checkbox"/> | 3 <input type="checkbox"/> | 5 <input type="checkbox"/> | 5 <input type="checkbox"/> |                            |
| 49. I am often irritable                     | 1 <input type="checkbox"/> | 2 <input type="checkbox"/> | 3 <input type="checkbox"/> | 5 <input type="checkbox"/> | 5 <input type="checkbox"/> |                            |

## OVERALL SUPPORT AND CARE

1  
2  
3 **50.** Do you have an up-to-date written care  
4 plan? *A care plan is a document that sets*  
5 *out your needs and goals for caring for*  
6 *your cancer.*  
7

- 8 1  Yes, definitely  
9  
10 2  Yes, I think so  
11  
12 3  No  
13  
14 4  I do not need a care plan  
15  
16 5  Don't know  
17

18  
19 **51.** Do you have a named nurse who you can  
20 contact if you have a worry about your  
21 cancer care? *A named nurse is sometimes*  
22 *known as a Clinical Nurse Specialist or*  
23 *Specialist Cancer Nurse.*  
24  
25

- 26 1  Yes  
27  
28 2  No  
29  
30 3  Don't know  
31  
32

33 **52.** Do you know who to contact if you have a  
34 concern about any aspect of living with or  
35 after cancer?  
36

- 37 1  Yes, definitely  
38  
39 2  Yes, I think so  
40  
41 3  No  
42  
43

44  
45 **53.** Do you think that hospital staff did  
46 everything they could to support you  
47 following your cancer treatment?  
48

- 49 1  Yes, all of the time  
50  
51 2  Only some of the time  
52  
53 3  Never  
54  
55 4  I did not need any support  
56  
57  
58  
59  
60

**54.** Do you think that GPs and nurses at your  
general practice do everything they can to  
support you following your cancer  
treatment?

- 1  Yes, all of the time  
2  Only some of the time  
3  Never  
4  My general practice is not involved  
5  I do not need any support

**55.** Following your initial cancer treatment  
have you been given enough care and help  
from health and social services (for  
example, district nurses, home helps or  
occupational therapists)?

- 1  Yes, definitely  
2  Yes, to some extent  
3  No  
4  I did not need help from health or social  
services  
5  Don't know / can't remember

**56.** Would it have been helpful to have had  
more advice or information on any of the  
following issues: **(Tick all that apply)**

- 1  Diet and lifestyle  
2  Physical activity and exercise  
3  Financial help or benefits  
4  Free prescriptions  
5  Returning to or staying in work  
6  Information / advice for family / friends /  
carer  
7  The physical aspects of living with and  
after cancer (e.g. side effects or signs  
of recurrence)  
8  The psychological or emotional aspects  
of living with and after cancer  
9  I have all the information and advice I  
need

# ABOUT YOU

**If you are helping someone to complete this questionnaire, please make sure this information is the patient's and not your own.**

**57. What year were you born?**

(Please write in) e.g. 

|   |   |   |   |
|---|---|---|---|
| 1 | 9 | 4 | 4 |
|---|---|---|---|

|   |   |   |   |
|---|---|---|---|
| Y | Y | Y | Y |
|---|---|---|---|

**58. Are you male or female?**

- 1  Male
- 2  Female

**59. Which of the following best describes your sexual orientation?**

- 1  Heterosexual / straight (opposite sex)
- 2  Bisexual (both sexes)
- 3  Lesbian (same sex)
- 4  Other
- 5  Prefer not to answer

**60. Which statement best describes your living arrangements?**

- 1  I live with partner/spouse/family/friends
- 2  I live alone
- 3  I live in a nursing home, hospital or other long term care home
- 4  Other

**61. Do you have a long standing health condition? Please include anything other than your cancer that has troubled you over a period of time or that could affect you over a period of time.**

- 1  Yes
- 2  No
- 3  Don't know / can't say

**62. Which, if any, of the following conditions do you have? (Tick all that apply)**

- 1  Alzheimer's disease or dementia
- 2  Angina
- 3  Arthritis
- 4  Asthma or other chronic chest problem
- 5  Blindness or visual impairment
- 6  Deafness or hearing impairment
- 7  Diabetes
- 8  Epilepsy
- 9  Heart condition
- 10  High blood pressure
- 11  Kidney disease
- 12  Learning difficulty
- 13  Liver disease
- 14  Long term back problems
- 15  Long-standing mental health problem
- 16  Long-standing neurological problem
- 17  Another long-standing condition
- 18  I do not have any of these conditions

1 **63.** What was your employment status  
2 *before you were diagnosed with*  
3 *cancer?*

- 4  Full time employment  
5  
6  Part time employment  
7  
8  Homemaker  
9  
10  Student (in education)  
11  
12  Retired  
13  
14  Unemployed – and seeking work  
15  
16  Unemployed – unable to work for health  
17 reasons  
18  
19  Other  
20  
21

22 **64.** What is your employment status  
23 *currently? If on maternity or sick leave*  
24 *answer in relation to your usual*  
25 *employment status*

- 26  
27  
28  Full time employment  
29  
30  Part time employment  
31  
32  Homemaker  
33  
34  Student (in education)  
35  
36  Retired  
37  
38  Unemployed – and seeking work  
39  
40  Unemployed – unable to work for health  
41 reasons  
42  
43  Other  
44  
45

46 **65.** If you are currently employed at the  
47 *moment, are you:*

- 48  
49  Not working at all  
50  
51  Working less hours than usual  
52  
53  Working your usual hours  
54  
55  Working more hours than usual  
56  
57  This question does not apply to me  
58  
59  
60

**66.** To which of these ethnic groups would  
you say you belong? (Tick **ONE** only)

**a. WHITE**

- 1  British  
2  Irish  
3  Any other White background  
(Please write in box)

**b. MIXED**

- 4  White and Black Caribbean  
5  White and Black African  
6  White and Asian  
7  Any other Mixed background  
(Please write in box)

**c. ASIAN OR ASIAN BRITISH**

- 8  Indian  
9  Pakistani  
10  Bangladeshi  
11  Any other Asian background  
(Please write in box)

**d. BLACK OR BLACK BRITISH**

- 12  Caribbean  
13  African  
14  Any other Black background  
(Please write in box)

**e. CHINESE OR OTHER ETHNIC GROUP**

- 15  Chinese  
16  Any other ethnic group  
(Please write in box)

## COMMENTS

If you have anything else you would like to tell us about living with and beyond cancer, please do so here:

1  
2  
3  
4  
5  
6  
7  
8  
9  
10  
11  
12  
13  
14  
15  
16  
17  
18  
19  
20  
21  
22  
23  
24  
25  
26  
27  
28  
29  
30  
31  
32  
33  
34  
35  
36  
37  
38  
39  
40  
41  
42  
43  
44  
45  
46  
47  
48  
49  
50  
51  
52  
53  
54



55  
56 Questions 5-9 are EQ- 5D-5L. UK (English) v.2 © 2009 EuroQol Group. EQ-5D™ is a trade mark of the  
57 EuroQol Group.

58  
59 Questions 10 – 18 are from FACIT copyright 1987, 1997 by David Cella, PhD

60  
Questions 20 – 40 are from the Social Difficulties Inventory. Originators of the Social Difficulties Inventory:  
Wright, E.P., Cull, A. and Selby, P.



## Living with and beyond Colorectal / Gastro Intestinal Cancer

This questionnaire is about your health and quality of life since being diagnosed with your cancer. Its purpose is to provide information which can help the NHS monitor and improve the quality of health services for future patients.

### Who should complete the questionnaire?

The questions should be answered by the person named in the letter enclosed with this questionnaire. If that person needs help to complete the questionnaire, the answers should be given from their point of view – not the point of view of the person who is helping.

### Completing the questionnaire

For each question please tick clearly inside the box that is closest to your views using a black or blue pen. Don't worry if you make a mistake; simply cross out the mistake and put a tick in the correct box. Please **do not** write your name or address anywhere on the questionnaire.

### IMPORTANT INFORMATION

To make sure the information we collect is useful, we need to collect some personal details from you and to access information held about you in other NHS databases. The purpose of collecting this information is to generate aggregated statistics about the quality of life for people who are living with and beyond cancer. These statistics will be used to compare the differences in quality of life for people treated for different types of cancer by different providers and to understand what may be causing these. The results will be used to measure and improve the quality of healthcare services.

**By completing this questionnaire you are giving your consent for the information provided to be used for the above purposes. Specifically, you are agreeing that:**

- Your personal details and relevant health information can be held and used by an organisation contracted to the Department of Health to analyse the data
- Other information about you held by the Patient Demographics Service, the Secondary Users Service, Cancer Registries and other NHS databases can be held and used by an organisation contracted to the Department of Health to analyse the data
- Your personal details can be used to send you related follow-up questionnaires in the future

Your personal information will be handled securely and anonymised after analysis and before any publication.

Your personal information will not be released by the Department of Health or third party organisations working on its behalf unless required by law or where there is a clear overriding public interest.

You can withdraw the information you give the NHS in this questionnaire upon request, up to the point at which data are analysed and personal details removed.

If you have any queries about the questionnaire,  
please call the FREEPHONE helpline number on **0800 783 1775**

**Taking part in this survey is voluntary**  
**Published reports will not contain any personal details**

## YOUR HEALTH TODAY

*The questions in this section are all about your health and how you feel on the day you complete this questionnaire.*

1. What treatments have you received for your colorectal / GI cancer? **(Tick all that apply)**

1  Radiotherapy

2  Chemotherapy

3  Surgery

2. How long is it since you completed your **initial treatment** for colorectal / GI cancer? *Treatment includes any chemotherapy, radiotherapy, or surgery for your colorectal / GI cancer.*

1  I am still having my initial treatment

2  It is less than 3 months since my initial treatment

3  It is between 3 and 12 months since my initial treatment

4  It is between 1 and 5 years since my initial treatment

5  It is more than 5 years since my initial treatment

6  Don't know / can't remember

3. How has your colorectal / GI cancer responded to treatment?

1  My colorectal / GI cancer has responded fully to treatment (I am in remission)

2  My colorectal / GI cancer has been treated but is still present

3  My colorectal / GI cancer has not been treated at all

4  My colorectal / GI cancer has come back after it was originally treated

5  I am not certain what is happening with my colorectal / GI cancer

4. If you have a stoma (e.g. colostomy) is it:

1  Still present

2  Reversed

3  This does not apply to me



# YOUR HEALTH TODAY

Under each heading, please tick the ONE box that best describes your health TODAY.

## ) . MOBILITY

- I have no problems in walking about <sub>1</sub>
- I have slight problems in walking about <sub>2</sub>
- I have moderate problems in walking about <sub>3</sub>
- I have severe problems in walking about <sub>4</sub>
- I am unable to walk about <sub>5</sub>

## \*. SELF CARE

- I have no problems washing or dressing myself <sub>1</sub>
- I have slight problems washing or dressing myself <sub>2</sub>
- I have moderate problems washing or dressing myself <sub>3</sub>
- I have severe problems washing or dressing myself <sub>4</sub>
- I am unable to wash or dress myself <sub>5</sub>

## + . USUAL ACTIVITIES (*work, study, housework, family or leisure activities*)

- I have no problems doing my usual activities <sub>1</sub>
- I have slight problems doing my usual activities <sub>2</sub>
- I have moderate problems doing my usual activities <sub>3</sub>
- I have severe problems doing my usual activities <sub>4</sub>
- I am unable to do my usual activities <sub>5</sub>

## , . PAIN / DISCOMFORT

- I have no pain or discomfort <sub>1</sub>
- I have slight pain or discomfort <sub>2</sub>
- I have moderate pain or discomfort <sub>3</sub>
- I have severe pain or discomfort <sub>4</sub>
- I have extreme pain or discomfort <sub>5</sub>

## - . ANXIETY / DEPRESSION

- I am not anxious or depressed <sub>1</sub>
- I am slightly anxious or depressed <sub>2</sub>
- I am moderately anxious or depressed <sub>3</sub>
- I am severely anxious or depressed <sub>4</sub>
- I am extremely anxious or depressed <sub>5</sub>

For peer review only - <http://bmjopen.bmj.com/site/about/guidelines.xhtml>



# YOUR HEALTH AND WELL BEING IN THE LAST 7 DAYS

*The questions in this section are about your health and how you have felt in the past 7 days.*

Please mark one box per line to give your response.

**During the past 7 days:**

|                                                          | Not at all                    | A little bit               | Some-what                      | Quite a bit                | Very much                  |
|----------------------------------------------------------|-------------------------------|----------------------------|--------------------------------|----------------------------|----------------------------|
| <b>1\$.</b> I have swelling or cramps in my stomach area | 1 <input type="checkbox"/>    | 2 <input type="checkbox"/> | 3 <input type="checkbox"/>     | 4 <input type="checkbox"/> | 5 <input type="checkbox"/> |
| <b>1%</b> I am losing weight                             | 1 <input type="checkbox"/>    | 2 <input type="checkbox"/> | 3 <input type="checkbox"/>     | 4 <input type="checkbox"/> | 5 <input type="checkbox"/> |
| <b>1&amp;</b> I have control of my bowels                | 1 <input type="checkbox"/>    | 2 <input type="checkbox"/> | 3 <input type="checkbox"/>     | 4 <input type="checkbox"/> | 5 <input type="checkbox"/> |
| <b>1' .</b> I can digest my food well                    | 1 <input type="checkbox"/>    | 2 <input type="checkbox"/> | 3 <input type="checkbox"/>     | 4 <input type="checkbox"/> | 5 <input type="checkbox"/> |
| <b>1( .</b> I have diarrhoea                             | 1 <input type="checkbox"/>    | 2 <input type="checkbox"/> | 3 <input type="checkbox"/>     | 4 <input type="checkbox"/> | 5 <input type="checkbox"/> |
| <b>1) .</b> I have a good appetite                       | 1 <input type="checkbox"/>    | 2 <input type="checkbox"/> | 3 <input type="checkbox"/>     | 4 <input type="checkbox"/> | 5 <input type="checkbox"/> |
| <b>1* .</b> I like the appearance of my body             | 1 <input type="checkbox"/>    | 2 <input type="checkbox"/> | 3 <input type="checkbox"/>     | 4 <input type="checkbox"/> | 5 <input type="checkbox"/> |
| <b>1+.</b> I have difficulty urinating                   | 1 <input type="checkbox"/>    | 2 <input type="checkbox"/> | 3 <input type="checkbox"/>     | 4 <input type="checkbox"/> | 5 <input type="checkbox"/> |
| <b>% .</b> I urinate more frequently than usual          | 1 <input type="checkbox"/>    | 2 <input type="checkbox"/> | 3 <input type="checkbox"/>     | 4 <input type="checkbox"/> | 5 <input type="checkbox"/> |
| <b>% .</b> I leak urine                                  | 1 <input type="checkbox"/>    | 2 <input type="checkbox"/> | 3 <input type="checkbox"/>     | 4 <input type="checkbox"/> | 5 <input type="checkbox"/> |
| <b>2\$.</b> Do you have an ostomy appliance / stoma?     | 1 <input type="checkbox"/> No |                            | 2 <input type="checkbox"/> Yes |                            |                            |

If yes, please answer the next two items:

|                                                                                         | Not at all                    | A little bit               | Some-what                      | Quite a bit                | Very much                  |
|-----------------------------------------------------------------------------------------|-------------------------------|----------------------------|--------------------------------|----------------------------|----------------------------|
| <b>2%</b> I am embarrassed by my ostomy appliance / stoma                               | 1 <input type="checkbox"/>    | 2 <input type="checkbox"/> | 3 <input type="checkbox"/>     | 4 <input type="checkbox"/> | 5 <input type="checkbox"/> |
| <b>2&amp;</b> Caring for my ostomy appliance / stoma is difficult                       | 1 <input type="checkbox"/>    | 2 <input type="checkbox"/> | 3 <input type="checkbox"/>     | 4 <input type="checkbox"/> | 5 <input type="checkbox"/> |
| <b>2' .</b> Do you have any difficulty in controlling your bowels (e.g. any accidents)? | 1 <input type="checkbox"/> No |                            | 2 <input type="checkbox"/> Yes |                            |                            |

|                                                         | Monthly                    | Weekly                     | Daily                      | Constantly                 | It varies                  |
|---------------------------------------------------------|----------------------------|----------------------------|----------------------------|----------------------------|----------------------------|
| <b>2( .</b> If yes, how often do you have difficulties? | 1 <input type="checkbox"/> | 2 <input type="checkbox"/> | 3 <input type="checkbox"/> | 4 <input type="checkbox"/> | 5 <input type="checkbox"/> |

**2) .** In the **past week**, on how many days have you done a total of 30 minutes or more of physical activity, which was enough to raise your heart rate? *This may include sport, exercise and brisk walking or cycling for recreation or to get to and from places, but should not include housework or physical activity that is part of your job.*

| None                       | 1 day                      | 2 days                     | 3 days                     | 4 days                     | 5 days                     | 6 days                     | 7 days                     |
|----------------------------|----------------------------|----------------------------|----------------------------|----------------------------|----------------------------|----------------------------|----------------------------|
| 1 <input type="checkbox"/> | 2 <input type="checkbox"/> | 3 <input type="checkbox"/> | 4 <input type="checkbox"/> | 5 <input type="checkbox"/> | 6 <input type="checkbox"/> | 7 <input type="checkbox"/> | 8 <input type="checkbox"/> |

## YOUR HEALTH AND WELL BEING IN THE LAST MONTH

*The questions in this section are about your health and how you have felt during the past month.*

Sometimes people who have, or have had cancer find that they have a number of everyday difficulties to cope with following their diagnosis. These might be to do with things like their family life, social activities, finances and work.

**Please tick the response that best describes your answer.**

| <i>During the past month:</i>                                                                                                                         | No difficulty              | A little                   | Quite a bit                | Very much                  | Does not apply             |
|-------------------------------------------------------------------------------------------------------------------------------------------------------|----------------------------|----------------------------|----------------------------|----------------------------|----------------------------|
| <b>2*</b> . Have you had any difficulty in maintaining your independence?                                                                             | 1 <input type="checkbox"/> | 2 <input type="checkbox"/> | 3 <input type="checkbox"/> | 4 <input type="checkbox"/> | 5 <input type="checkbox"/> |
| <b>2+</b> . Have you had any difficulty in carrying out your domestic chores? (e.g. cleaning, gardening, cooking, shopping)                           | 1 <input type="checkbox"/> | 2 <input type="checkbox"/> | 3 <input type="checkbox"/> | 4 <input type="checkbox"/> | 5 <input type="checkbox"/> |
| <b>&amp; .</b> Have you had any difficulty with managing your own personal care? (e.g. bathing, dressing, washing)                                    | 1 <input type="checkbox"/> | 2 <input type="checkbox"/> | 3 <input type="checkbox"/> | 4 <input type="checkbox"/> | 5 <input type="checkbox"/> |
| <b>&amp; -</b> . Have you had any difficulty with looking after those who depend on you? (e.g. children, dependent adults, pets)                      | 1 <input type="checkbox"/> | 2 <input type="checkbox"/> | 3 <input type="checkbox"/> | 4 <input type="checkbox"/> | 5 <input type="checkbox"/> |
| <b>3\$</b> . Have any of those close to you (e.g. partner, children, parents) had any difficulty with the support available to them?                  | 1 <input type="checkbox"/> | 2 <input type="checkbox"/> | 3 <input type="checkbox"/> | 4 <input type="checkbox"/> | 5 <input type="checkbox"/> |
| <b>3%</b> Have you had any difficulty with benefits? (e.g. statutory sick pay, attendance allowance, disability living allowance)                     | 1 <input type="checkbox"/> | 2 <input type="checkbox"/> | 3 <input type="checkbox"/> | 4 <input type="checkbox"/> | 5 <input type="checkbox"/> |
| <b>3&amp;</b> Have you had any financial difficulties?                                                                                                | 1 <input type="checkbox"/> | 2 <input type="checkbox"/> | 3 <input type="checkbox"/> | 4 <input type="checkbox"/> | 5 <input type="checkbox"/> |
| <b>3'</b> . Have you had any difficulty with financial services? (e.g. loans, mortgages, pensions, insurance)                                         | 1 <input type="checkbox"/> | 2 <input type="checkbox"/> | 3 <input type="checkbox"/> | 4 <input type="checkbox"/> | 5 <input type="checkbox"/> |
| <b>3(.</b> Have you had any difficulty concerning your work? (or education if you are a student)                                                      | 1 <input type="checkbox"/> | 2 <input type="checkbox"/> | 3 <input type="checkbox"/> | 4 <input type="checkbox"/> | 5 <input type="checkbox"/> |
| <b>3)</b> . Have you had any difficulty with planning for your own or your family's future? (e.g. care of dependents, legal issues, business affairs) | 1 <input type="checkbox"/> | 2 <input type="checkbox"/> | 3 <input type="checkbox"/> | 4 <input type="checkbox"/> | 5 <input type="checkbox"/> |

# YOUR HEALTH AND WELL BEING IN THE LAST MONTH

1  
2  
3  
4  
5  
6  
7  
8  
9  
10  
11  
12  
13  
14  
15  
16  
17  
18  
19  
20  
21  
22  
23  
24  
25  
26  
27  
28  
29  
30  
31  
32  
33  
34  
35  
36  
37  
38  
39  
40  
41  
42  
43  
44  
45  
46  
47  
48  
49  
50  
51  
52  
53  
54  
55  
56  
57  
58  
59  
60

*During the past month:*

No difficulty      A little      Quite a bit      Very much      Does not apply

- 3\*. Have you had any difficulty with communicating with those closest to you? (e.g. partner, children, parents)      1       2       3       4       5
- 3+. Have you had any difficulty with communicating with others? (e.g. friends, neighbours, colleagues, dates)      1       2       3       4       5
- ' , . Have you had any difficulty concerning sexual matters?      1       2       3       4       5
- ' - . Have you had any difficulty concerning plans to have a family?      1       2       3       4       5
- 4\$. Have you had any difficulty concerning your appearance or body image?      1       2       3       4       5
- 4%. Have you felt isolated?      1       2       3       4       5
- 4&. Have you had any difficulty with getting around? (e.g. transport, car parking, your mobility)      1       2       3       4       5
- 4' . Have you had any difficulty with where you live? (e.g. space, access, damp, heating, neighbours, security)      1       2       3       4       5
- 4( . Have you had any difficulty in carrying out your recreational activities? (e.g. hobbies, pastimes, social pursuits)      1       2       3       4       5
- 4) . Have you had any difficulty with your plans to travel or take a holiday?      1       2       3       4       5
- 4\* . Have you had any difficulty with any other area of your everyday life?      1       2       3       4       5

# YOUR HEALTH AND WELL BEING IN THE LAST MONTH

*The questions in this section are about your health and how you have felt during the past month.*

Please tick the response that best describes your answer.

|                                                      | Strongly agree             | Agree                      | Neither agree nor disagree | Disagree                   | Strongly disagree          | Does not apply to me       |
|------------------------------------------------------|----------------------------|----------------------------|----------------------------|----------------------------|----------------------------|----------------------------|
| <b>4+.</b> I have fears about my cancer spreading    | 1 <input type="checkbox"/> | 2 <input type="checkbox"/> | 3 <input type="checkbox"/> | 4 <input type="checkbox"/> | 5 <input type="checkbox"/> | 6 <input type="checkbox"/> |
| <b>(, .</b> I have fears about my cancer coming back | 1 <input type="checkbox"/> | 2 <input type="checkbox"/> | 3 <input type="checkbox"/> | 4 <input type="checkbox"/> | 5 <input type="checkbox"/> | 6 <input type="checkbox"/> |
| <b>( - .</b> I have fears about death and dying      | 1 <input type="checkbox"/> | 2 <input type="checkbox"/> | 3 <input type="checkbox"/> | 4 <input type="checkbox"/> | 5 <input type="checkbox"/> |                            |
| <b>5\$.</b> I experience memory loss                 | 1 <input type="checkbox"/> | 2 <input type="checkbox"/> | 3 <input type="checkbox"/> | 4 <input type="checkbox"/> | 5 <input type="checkbox"/> |                            |
| <b>5%</b> I have trouble sleeping                    | 1 <input type="checkbox"/> | 2 <input type="checkbox"/> | 3 <input type="checkbox"/> | 4 <input type="checkbox"/> | 5 <input type="checkbox"/> |                            |
| <b>5&amp;.</b> I have trouble concentrating          | 1 <input type="checkbox"/> | 2 <input type="checkbox"/> | 3 <input type="checkbox"/> | 4 <input type="checkbox"/> | 5 <input type="checkbox"/> |                            |
| <b>5' .</b> I always feel tired                      | 1 <input type="checkbox"/> | 2 <input type="checkbox"/> | 3 <input type="checkbox"/> | 4 <input type="checkbox"/> | 5 <input type="checkbox"/> |                            |
| <b>5( .</b> I experience mood swings                 | 1 <input type="checkbox"/> | 2 <input type="checkbox"/> | 3 <input type="checkbox"/> | 4 <input type="checkbox"/> | 5 <input type="checkbox"/> |                            |
| <b>5) .</b> I am often irritable                     | 1 <input type="checkbox"/> | 2 <input type="checkbox"/> | 3 <input type="checkbox"/> | 4 <input type="checkbox"/> | 5 <input type="checkbox"/> |                            |

## OVERALL SUPPORT AND CARE

1  
2  
3 **5\***. Do you have an up-to-date written care  
4 plan? *A care plan is a document that sets*  
5 *out your needs and goals for caring for*  
6 *your cancer.*  
7

- 8 1  Yes, definitely  
9  
10 2  Yes, I think so  
11  
12 3  No  
13  
14 4  I do not need a care plan  
15  
16 5  Don't know  
17

18  
19 **5+**. Do you have a named nurse who you can  
20 contact if you have a worry about your  
21 cancer care? *A named nurse is sometimes*  
22 *known as a Clinical Nurse Specialist or*  
23 *Specialist Cancer Nurse.*  
24  
25

- 26 1  Yes  
27  
28 2  No  
29  
30 3  Don't know  
31  
32

33 **), .** Do you know who to contact if you have a  
34 concern about any aspect of living with or  
35 after cancer?  
36

- 37 1  Yes, definitely  
38  
39 2  Yes, I think so  
40  
41 3  No  
42  
43

44  
45 **) - .** Do you think that hospital staff did  
46 everything they could to support you  
47 following your cancer treatment?  
48

- 49 1  Yes, all of the time  
50  
51 2  Only some of the time  
52  
53 3  Never  
54  
55 4  I did not need any support  
56  
57  
58  
59  
60

**6\$.** Do you think that GPs and nurses at your  
general practice do everything they can to  
support you following your cancer  
treatment?

- 1  Yes, all of the time  
2  Only some of the time  
3  Never  
4  My general practice is not involved  
5  I do not need any support

**6%** Following your initial cancer treatment  
have you been given enough care and help  
from health and social services (for  
example, district nurses, home helps or  
occupational therapists)?

- 1  Yes, definitely  
2  Yes, to some extent  
3  No  
4  I did not need help from health or social  
services  
5  Don't know / can't remember

**6&.** Would it have been helpful to have had  
more advice or information on any of the  
following issues: **(Tick all that apply)**

- 1  Diet and lifestyle  
2  Physical activity and exercise  
3  Financial help or benefits  
4  Free prescriptions  
5  Returning to or staying in work  
6  Information / advice for family / friends /  
carer  
7  The physical aspects of living with and  
after cancer (e.g. side effects or signs  
of recurrence)  
8  The psychological or emotional aspects  
of living with and after cancer  
9  I have all the information and advice I  
need

## ABOUT YOU

**If you are helping someone to complete this questionnaire, please make sure this information is the patient's and not your own.**

**6' .** What year were you born?

(Please write in) e.g. 

|   |   |   |   |
|---|---|---|---|
| 1 | 9 | 4 | 4 |
|---|---|---|---|

|   |   |   |   |
|---|---|---|---|
| Y | Y | Y | Y |
|---|---|---|---|

**64.** Are you male or female?

- 1  Male
- 2  Female

**65.** Which of the following best describes your sexual orientation?

- 1  Heterosexual / straight (opposite sex)
- 2  Bisexual (both sexes)
- 3  Gay or lesbian (same sex)
- 4  Other
- 5  Prefer not to answer

**66.** Which statement best describes your living arrangements?

- 1  I live with partner/spouse/family/friends
- 2  I live alone
- 3  I live in a nursing home, hospital or other long term care home
- 4  Other

**67.** Do you have a long standing health condition? *Please include anything other than your cancer that has troubled you over a period of time or that could affect you over a period of time.*

- 1  Yes
- 2  No
- 3  Don't know / can't say

**68.** Which, if any, of the following conditions do you have? **(Tick all that apply)**

- 1  Alzheimer's disease or dementia
- 2  Angina
- 3  Arthritis
- 4  Asthma or other chronic chest problem
- 5  Blindness or visual impairment
- 6  Deafness or hearing impairment
- 7  Diabetes
- 8  Epilepsy
- 9  Heart condition
- 10  High blood pressure
- 11  Kidney disease
- 12  Learning difficulty
- 13  Liver disease
- 14  Long term back problems
- 15  Long-standing mental health problem
- 16  Long-standing neurological problem
- 17  Another long-standing condition
- 18  I do not have any of these conditions

69. What was your employment status *before you were diagnosed with cancer?*

- Full time employment
- Part time employment
- Homemaker
- Student (in education)
- Retired
- Unemployed – and seeking work
- Unemployed – unable to work for health reasons
- Other

70. What is your employment status currently? *If on maternity or sick leave answer in relation to your usual employment status.*

- Full time employment
- Part time employment
- Homemaker
- Student (in education)
- Retired
- Unemployed – and seeking work
- Unemployed – unable to work for health reasons
- Other

71. If you are currently employed at the moment, are you:

- Not working at all
- Working less hours than usual
- Working your usual hours
- Working more hours than usual
- This question does not apply to me

72. To which of these ethnic groups would you say you belong? (Tick **ONE** only)

**a. WHITE**

- British
- Irish
- Any other White background (Please write in box)

**b. MIXED**

- White and Black Caribbean
- White and Black African
- White and Asian
- Any other Mixed background (Please write in box)

**c. ASIAN OR ASIAN BRITISH**

- Indian
- Pakistani
- Bangladeshi
- Any other Asian background (Please write in box)

**d. BLACK OR BLACK BRITISH**

- Caribbean
- African
- Any other Black background (Please write in box)

**e. CHINESE OR OTHER ETHNIC GROUP**

- Chinese
- Any other ethnic group (Please write in box)



## COMMENTS

If you have anything else you would like to tell us about living with and beyond cancer, please do so here:

1  
2  
3  
4  
5  
6  
7  
8  
9  
10  
11  
12  
13  
14  
15  
16  
17  
18  
19  
20  
21  
22  
23  
24  
25  
26  
27  
28  
29  
30  
31  
32  
33  
34  
35  
36  
37  
38  
39  
40  
41  
42  
43  
44  
45  
46  
47  
48  
49  
50  
51  
52  
53  
54



Questions 5-9 are EQ -5D-5L. UK (English) v.2 © 2009 EuroQol Group. EQ-5D™ is a trade mark of the EuroQol Group.

Questions 10 – 18 and 20 - 22 are taken from FACIT copyright 1987, 1997 by David Cella, PhD

Questions 26 – 46 are taken from the Social Difficulties Inventory. Originators of the Social Difficulties Inventory: Wright, E.P., Cull, A. and Selby, P.





## Living with and beyond Non Hodgkin's Lymphoma

This questionnaire is about your health and quality of life since being diagnosed with your cancer. Its purpose is to provide information which can help the NHS monitor and improve the quality of health services for future patients.

### Who should complete the questionnaire?

The questions should be answered by the person named in the letter enclosed with this questionnaire. If that person needs help to complete the questionnaire, the answers should be given from their point of view – not the point of view of the person who is helping.

### Completing the questionnaire

For each question please tick clearly inside the box that is closest to your views using a black or blue pen. Don't worry if you make a mistake; simply cross out the mistake and put a tick in the correct box. Please **do not** write your name or address anywhere on the questionnaire.

### IMPORTANT INFORMATION

To make sure the information we collect is useful, we need to collect some personal details from you and to access information held about you in other NHS databases. The purpose of collecting this information is to generate aggregated statistics about the quality of life for people who are living with and beyond cancer. These statistics will be used to compare the differences in quality of life for people treated for different types of cancer by different providers and to understand what may be causing these. The results will be used to measure and improve the quality of healthcare services.

**By completing this questionnaire you are giving your consent for the information provided to be used for the above purposes. Specifically, you are agreeing that:**

- Your personal details and relevant health information can be held and used by an organisation contracted to the Department of Health to analyse the data
- Other information about you held by the Patient Demographics Service, the Secondary Users Service, Cancer Registries and other NHS databases can be held and used by an organisation contracted to the Department of Health to analyse the data
- Your personal details can be used to send you related follow-up questionnaires in the future

Your personal information will be handled securely and anonymised after analysis and before any publication.

Your personal information will not be released by the Department of Health or third party organisations working on its behalf unless required by law or where there is a clear overriding public interest.

You can withdraw the information you give the NHS in this questionnaire upon request, up to the point at which data are analysed and personal details removed.

If you have any queries about the questionnaire,  
please call the FREEPHONE helpline number on **0800 783 1775**

**Taking part in this survey is voluntary**  
**Published reports will not contain any personal details**

## YOUR HEALTH TODAY

*The questions in this section are all about your health and how you feel on the day you complete this questionnaire.*

1. What treatments have you received for your Non Hodgkin's Lymphoma (NHL)? (Tick all that apply)

- 1  Radiotherapy
- 2  Chemotherapy
- 3  Surgery
- 4  Antibody therapy (including Rituximab)
- 5  Stem cell transplant

2. How long is it since you completed your **initial treatment** for NHL? *Treatment includes any chemotherapy, radiotherapy, or surgery for your NHL. When answering this question please do not include antibody (Rituximab) treatment which you may have been given as a maintenance treatment following chemotherapy.*

- 1  I am still having my initial treatment
- 2  It is less than 3 months since my initial treatment
- 3  It is between 3 and 12 months since my initial treatment
- 4  It is between 1 and 5 years since my initial treatment
- 5  It is more than 5 years since my initial treatment
- 6  Don't know / can't remember

3. How has your NHL responded to treatment?

- 1  My NHL has responded fully to treatment (I am in remission)
- 2  My NHL has been treated but is still present
- 3  My NHL has not been treated at all
- 4  My NHL has come back after it was originally treated
- 5  I am not certain what is happening with my NHL

# YOUR HEALTH TODAY

Under each heading, please tick the **ONE** box that best describes your health TODAY.

## 4. MOBILITY

- I have no problems in walking about <sub>1</sub>
- I have slight problems in walking about <sub>2</sub>
- I have moderate problems in walking about <sub>3</sub>
- I have severe problems in walking about <sub>4</sub>
- I am unable to walk about <sub>5</sub>

## 5. SELF CARE

- I have no problems washing or dressing myself <sub>1</sub>
- I have slight problems washing or dressing myself <sub>2</sub>
- I have moderate problems washing or dressing myself <sub>3</sub>
- I have severe problems washing or dressing myself <sub>4</sub>
- I am unable to wash or dress myself <sub>5</sub>

## 6. USUAL ACTIVITIES (*work, study, housework, family or leisure activities*)

- I have no problems doing my usual activities <sub>1</sub>
- I have slight problems doing my usual activities <sub>2</sub>
- I have moderate problems doing my usual activities <sub>3</sub>
- I have severe problems doing my usual activities <sub>4</sub>
- I am unable to do my usual activities <sub>5</sub>

## 7. PAIN / DISCOMFORT

- I have no pain or discomfort <sub>1</sub>
- I have slight pain or discomfort <sub>2</sub>
- I have moderate pain or discomfort <sub>3</sub>
- I have severe pain or discomfort <sub>4</sub>
- I have extreme pain or discomfort <sub>5</sub>

## 8. ANXIETY / DEPRESSION

- I am not anxious or depressed <sub>1</sub>
- I am slightly anxious or depressed <sub>2</sub>
- I am moderately anxious or depressed <sub>3</sub>
- I am severely anxious or depressed <sub>4</sub>
- I am extremely anxious or depressed <sub>5</sub>

## YOUR HEALTH AND WELL BEING IN THE LAST 7 DAYS

*The questions in this section are about your health and how you have felt in the past 7 days.*

Please mark one box per line to give your response.

| <i>During the past 7 days:</i> |                                                                                                                                                                                                                                                                                                                                                           | Not at all                 | A little bit               | Some-what                  | Quite a bit                | Very much                  |                            |                            |
|--------------------------------|-----------------------------------------------------------------------------------------------------------------------------------------------------------------------------------------------------------------------------------------------------------------------------------------------------------------------------------------------------------|----------------------------|----------------------------|----------------------------|----------------------------|----------------------------|----------------------------|----------------------------|
| 9.                             | I have certain parts of my body where I experience pain                                                                                                                                                                                                                                                                                                   | 1 <input type="checkbox"/> | 2 <input type="checkbox"/> | 3 <input type="checkbox"/> | 4 <input type="checkbox"/> | 5 <input type="checkbox"/> |                            |                            |
| 10.                            | I am bothered by lumps or swelling in certain parts of my body (e.g. neck, armpits, or groin)                                                                                                                                                                                                                                                             | 1 <input type="checkbox"/> | 2 <input type="checkbox"/> | 3 <input type="checkbox"/> | 4 <input type="checkbox"/> | 5 <input type="checkbox"/> |                            |                            |
| 11.                            | I am bothered by fevers (episodes of high body temperature)                                                                                                                                                                                                                                                                                               | 1 <input type="checkbox"/> | 2 <input type="checkbox"/> | 3 <input type="checkbox"/> | 4 <input type="checkbox"/> | 5 <input type="checkbox"/> |                            |                            |
| 12.                            | I have night sweats                                                                                                                                                                                                                                                                                                                                       | 1 <input type="checkbox"/> | 2 <input type="checkbox"/> | 3 <input type="checkbox"/> | 4 <input type="checkbox"/> | 5 <input type="checkbox"/> |                            |                            |
| 13.                            | I am bothered by itching                                                                                                                                                                                                                                                                                                                                  | 1 <input type="checkbox"/> | 2 <input type="checkbox"/> | 3 <input type="checkbox"/> | 4 <input type="checkbox"/> | 5 <input type="checkbox"/> |                            |                            |
| 14.                            | I have trouble sleeping at night                                                                                                                                                                                                                                                                                                                          | 1 <input type="checkbox"/> | 2 <input type="checkbox"/> | 3 <input type="checkbox"/> | 4 <input type="checkbox"/> | 5 <input type="checkbox"/> |                            |                            |
| 15.                            | I get tired easily                                                                                                                                                                                                                                                                                                                                        | 1 <input type="checkbox"/> | 2 <input type="checkbox"/> | 3 <input type="checkbox"/> | 4 <input type="checkbox"/> | 5 <input type="checkbox"/> |                            |                            |
| 16.                            | I am losing weight                                                                                                                                                                                                                                                                                                                                        | 1 <input type="checkbox"/> | 2 <input type="checkbox"/> | 3 <input type="checkbox"/> | 4 <input type="checkbox"/> | 5 <input type="checkbox"/> |                            |                            |
| 17.                            | I have a loss of appetite                                                                                                                                                                                                                                                                                                                                 | 1 <input type="checkbox"/> | 2 <input type="checkbox"/> | 3 <input type="checkbox"/> | 4 <input type="checkbox"/> | 5 <input type="checkbox"/> |                            |                            |
| 18.                            | I have trouble concentrating                                                                                                                                                                                                                                                                                                                              | 1 <input type="checkbox"/> | 2 <input type="checkbox"/> | 3 <input type="checkbox"/> | 4 <input type="checkbox"/> | 5 <input type="checkbox"/> |                            |                            |
| 19.                            | I worry about getting infections                                                                                                                                                                                                                                                                                                                          | 1 <input type="checkbox"/> | 2 <input type="checkbox"/> | 3 <input type="checkbox"/> | 4 <input type="checkbox"/> | 5 <input type="checkbox"/> |                            |                            |
| 20.                            | I worry that I might get new symptoms of my illness                                                                                                                                                                                                                                                                                                       | 1 <input type="checkbox"/> | 2 <input type="checkbox"/> | 3 <input type="checkbox"/> | 4 <input type="checkbox"/> | 5 <input type="checkbox"/> |                            |                            |
| 21.                            | I feel isolated from others because of my illness or treatment                                                                                                                                                                                                                                                                                            | 1 <input type="checkbox"/> | 2 <input type="checkbox"/> | 3 <input type="checkbox"/> | 4 <input type="checkbox"/> | 5 <input type="checkbox"/> |                            |                            |
| 22.                            | I have emotional ups and downs                                                                                                                                                                                                                                                                                                                            | 1 <input type="checkbox"/> | 2 <input type="checkbox"/> | 3 <input type="checkbox"/> | 4 <input type="checkbox"/> | 5 <input type="checkbox"/> |                            |                            |
| 23.                            | Because of my illness, I have difficulty planning for the future                                                                                                                                                                                                                                                                                          | 1 <input type="checkbox"/> | 2 <input type="checkbox"/> | 3 <input type="checkbox"/> | 4 <input type="checkbox"/> | 5 <input type="checkbox"/> |                            |                            |
| 24.                            | In the <b>past week</b> , on how many days have you done a total of 30 minutes or more of physical activity, which was enough to raise your heart rate? <i>This may include sport, exercise and brisk walking or cycling for recreation or to get to and from places, but should not include housework or physical activity that is part of your job.</i> |                            |                            |                            |                            |                            |                            |                            |
|                                | <b>None</b>                                                                                                                                                                                                                                                                                                                                               | <b>1 day</b>               | <b>2 days</b>              | <b>3 days</b>              | <b>4 days</b>              | <b>5 days</b>              | <b>6 days</b>              | <b>7 days</b>              |
|                                | 1 <input type="checkbox"/>                                                                                                                                                                                                                                                                                                                                | 2 <input type="checkbox"/> | 3 <input type="checkbox"/> | 4 <input type="checkbox"/> | 5 <input type="checkbox"/> | 6 <input type="checkbox"/> | 7 <input type="checkbox"/> | 8 <input type="checkbox"/> |

# YOUR HEALTH AND WELL BEING IN THE LAST MONTH

**The questions in this section are about your health and how you have felt during the past month.**

Sometimes people who have, or have had cancer find that they have a number of everyday difficulties to cope with following their diagnosis. These might be to do with things like their family life, social activities, finances and work.

**Please tick the response that best describes your answer.**

| <i>During the past month:</i>                                                                                                                 | No difficulty              | A little                   | Quite a bit                | Very much                  | Does not apply             |
|-----------------------------------------------------------------------------------------------------------------------------------------------|----------------------------|----------------------------|----------------------------|----------------------------|----------------------------|
| 25. Have you had any difficulty in maintaining your independence?                                                                             | 1 <input type="checkbox"/> | 2 <input type="checkbox"/> | 3 <input type="checkbox"/> | 4 <input type="checkbox"/> | 5 <input type="checkbox"/> |
| 26. Have you had any difficulty in carrying out your domestic chores? (e.g. cleaning, gardening, cooking, shopping)                           | 1 <input type="checkbox"/> | 2 <input type="checkbox"/> | 3 <input type="checkbox"/> | 4 <input type="checkbox"/> | 5 <input type="checkbox"/> |
| 27. Have you had any difficulty with managing your own personal care? (e.g. bathing, dressing, washing)                                       | 1 <input type="checkbox"/> | 2 <input type="checkbox"/> | 3 <input type="checkbox"/> | 4 <input type="checkbox"/> | 5 <input type="checkbox"/> |
| 28. Have you had any difficulty with looking after those who depend on you? (e.g. children, dependent adults, pets)                           | 1 <input type="checkbox"/> | 2 <input type="checkbox"/> | 3 <input type="checkbox"/> | 4 <input type="checkbox"/> | 5 <input type="checkbox"/> |
| 29. Have any of those close to you (e.g. partner, children, parents) had any difficulty with the support available to them?                   | 1 <input type="checkbox"/> | 2 <input type="checkbox"/> | 3 <input type="checkbox"/> | 4 <input type="checkbox"/> | 5 <input type="checkbox"/> |
| 30. Have you had any difficulty with benefits? (e.g. statutory sick pay, attendance allowance, disability living allowance)                   | 1 <input type="checkbox"/> | 2 <input type="checkbox"/> | 3 <input type="checkbox"/> | 4 <input type="checkbox"/> | 5 <input type="checkbox"/> |
| 31. Have you had any financial difficulties?                                                                                                  | 1 <input type="checkbox"/> | 2 <input type="checkbox"/> | 3 <input type="checkbox"/> | 4 <input type="checkbox"/> | 5 <input type="checkbox"/> |
| 32. Have you had any difficulty with financial services? (e.g. loans, mortgages, pensions, insurance)                                         | 1 <input type="checkbox"/> | 2 <input type="checkbox"/> | 3 <input type="checkbox"/> | 4 <input type="checkbox"/> | 5 <input type="checkbox"/> |
| 33. Have you had any difficulty concerning your work? (or education if you are a student)                                                     | 1 <input type="checkbox"/> | 2 <input type="checkbox"/> | 3 <input type="checkbox"/> | 4 <input type="checkbox"/> | 5 <input type="checkbox"/> |
| 34. Have you had any difficulty with planning for your own or your family's future? (e.g. care of dependents, legal issues, business affairs) | 1 <input type="checkbox"/> | 2 <input type="checkbox"/> | 3 <input type="checkbox"/> | 4 <input type="checkbox"/> | 5 <input type="checkbox"/> |

# YOUR HEALTH AND WELL BEING IN THE LAST MONTH

|    |                                                     | No<br>difficulty           | A little                   | Quite<br>a bit             | Very<br>much               | Does<br>not<br>apply       |
|----|-----------------------------------------------------|----------------------------|----------------------------|----------------------------|----------------------------|----------------------------|
| 1  |                                                     |                            |                            |                            |                            |                            |
| 2  |                                                     |                            |                            |                            |                            |                            |
| 3  |                                                     |                            |                            |                            |                            |                            |
| 4  |                                                     |                            |                            |                            |                            |                            |
| 5  |                                                     |                            |                            |                            |                            |                            |
| 6  |                                                     |                            |                            |                            |                            |                            |
| 7  | <i>During the past month:</i>                       |                            |                            |                            |                            |                            |
| 8  |                                                     |                            |                            |                            |                            |                            |
| 9  |                                                     |                            |                            |                            |                            |                            |
| 10 | <b>35.</b> Have you had any difficulty with         | 1 <input type="checkbox"/> | 2 <input type="checkbox"/> | 3 <input type="checkbox"/> | 4 <input type="checkbox"/> | 5 <input type="checkbox"/> |
| 11 | communicating with those closest to                 |                            |                            |                            |                            |                            |
| 12 | you? (e.g. partner, children, parents)              |                            |                            |                            |                            |                            |
| 13 |                                                     |                            |                            |                            |                            |                            |
| 14 |                                                     |                            |                            |                            |                            |                            |
| 15 | <b>36.</b> Have you had any difficulty with         | 1 <input type="checkbox"/> | 2 <input type="checkbox"/> | 3 <input type="checkbox"/> | 4 <input type="checkbox"/> | 5 <input type="checkbox"/> |
| 16 | communicating with others? (e.g. friends,           |                            |                            |                            |                            |                            |
| 17 | neighbours, colleagues, dates)                      |                            |                            |                            |                            |                            |
| 18 |                                                     |                            |                            |                            |                            |                            |
| 19 |                                                     |                            |                            |                            |                            |                            |
| 20 | <b>37.</b> Have you had any difficulty concerning   | 1 <input type="checkbox"/> | 2 <input type="checkbox"/> | 3 <input type="checkbox"/> | 4 <input type="checkbox"/> | 5 <input type="checkbox"/> |
| 21 | sexual matters?                                     |                            |                            |                            |                            |                            |
| 22 |                                                     |                            |                            |                            |                            |                            |
| 23 | <b>38.</b> Have you had any difficulty concerning   | 1 <input type="checkbox"/> | 2 <input type="checkbox"/> | 3 <input type="checkbox"/> | 4 <input type="checkbox"/> | 5 <input type="checkbox"/> |
| 24 | plans to have a family?                             |                            |                            |                            |                            |                            |
| 25 |                                                     |                            |                            |                            |                            |                            |
| 26 | <b>39.</b> Have you had any difficulty concerning   | 1 <input type="checkbox"/> | 2 <input type="checkbox"/> | 3 <input type="checkbox"/> | 4 <input type="checkbox"/> | 5 <input type="checkbox"/> |
| 27 | your appearance or body image?                      |                            |                            |                            |                            |                            |
| 28 |                                                     |                            |                            |                            |                            |                            |
| 29 |                                                     |                            |                            |                            |                            |                            |
| 30 | <b>40.</b> Have you felt isolated?                  | 1 <input type="checkbox"/> | 2 <input type="checkbox"/> | 3 <input type="checkbox"/> | 4 <input type="checkbox"/> | 5 <input type="checkbox"/> |
| 31 |                                                     |                            |                            |                            |                            |                            |
| 32 | <b>41.</b> Have you had any difficulty with getting | 1 <input type="checkbox"/> | 2 <input type="checkbox"/> | 3 <input type="checkbox"/> | 4 <input type="checkbox"/> | 5 <input type="checkbox"/> |
| 33 | around? (e.g. transport, car parking, your          |                            |                            |                            |                            |                            |
| 34 | mobility)                                           |                            |                            |                            |                            |                            |
| 35 |                                                     |                            |                            |                            |                            |                            |
| 36 |                                                     |                            |                            |                            |                            |                            |
| 37 | <b>42.</b> Have you had any difficulty with where   | 1 <input type="checkbox"/> | 2 <input type="checkbox"/> | 3 <input type="checkbox"/> | 4 <input type="checkbox"/> | 5 <input type="checkbox"/> |
| 38 | you live? (e.g. space, access, damp,                |                            |                            |                            |                            |                            |
| 39 | heating, neighbours, security)                      |                            |                            |                            |                            |                            |
| 40 |                                                     |                            |                            |                            |                            |                            |
| 41 | <b>43.</b> Have you had any difficulty in carrying  | 1 <input type="checkbox"/> | 2 <input type="checkbox"/> | 3 <input type="checkbox"/> | 4 <input type="checkbox"/> | 5 <input type="checkbox"/> |
| 42 | out your recreational activities? (e.g.             |                            |                            |                            |                            |                            |
| 43 | hobbies, pastimes, social pursuits)                 |                            |                            |                            |                            |                            |
| 44 |                                                     |                            |                            |                            |                            |                            |
| 45 |                                                     |                            |                            |                            |                            |                            |
| 46 | <b>44.</b> Have you had any difficulty with your    | 1 <input type="checkbox"/> | 2 <input type="checkbox"/> | 3 <input type="checkbox"/> | 4 <input type="checkbox"/> | 5 <input type="checkbox"/> |
| 47 | plans to travel or take a holiday?                  |                            |                            |                            |                            |                            |
| 48 |                                                     |                            |                            |                            |                            |                            |
| 49 |                                                     |                            |                            |                            |                            |                            |
| 50 | <b>45.</b> Have you had any difficulty with any     | 1 <input type="checkbox"/> | 2 <input type="checkbox"/> | 3 <input type="checkbox"/> | 4 <input type="checkbox"/> | 5 <input type="checkbox"/> |
| 51 | other area of your everyday life?                   |                            |                            |                            |                            |                            |
| 52 |                                                     |                            |                            |                            |                            |                            |
| 53 |                                                     |                            |                            |                            |                            |                            |
| 54 |                                                     |                            |                            |                            |                            |                            |
| 55 |                                                     |                            |                            |                            |                            |                            |
| 56 |                                                     |                            |                            |                            |                            |                            |
| 57 |                                                     |                            |                            |                            |                            |                            |
| 58 |                                                     |                            |                            |                            |                            |                            |
| 59 |                                                     |                            |                            |                            |                            |                            |
| 60 |                                                     |                            |                            |                            |                            |                            |

# YOUR HEALTH AND WELL BEING IN THE LAST MONTH

*The questions in this section are about your health and how you have felt during the past month.*

**Please tick the response that best describes your answer.**

|                                                     | Strongly agree             | Agree                      | Neither agree nor disagree | Disagree                   | Strongly disagree          | Does not apply to me       |
|-----------------------------------------------------|----------------------------|----------------------------|----------------------------|----------------------------|----------------------------|----------------------------|
| <b>46.</b> I have fears about my cancer spreading   | 1 <input type="checkbox"/> | 2 <input type="checkbox"/> | 3 <input type="checkbox"/> | 4 <input type="checkbox"/> | 5 <input type="checkbox"/> | 6 <input type="checkbox"/> |
| <b>47.</b> I have fears about my cancer coming back | 1 <input type="checkbox"/> | 2 <input type="checkbox"/> | 3 <input type="checkbox"/> | 4 <input type="checkbox"/> | 5 <input type="checkbox"/> | 6 <input type="checkbox"/> |
| <b>48.</b> I have fears about death and dying       | 1 <input type="checkbox"/> | 2 <input type="checkbox"/> | 3 <input type="checkbox"/> | 4 <input type="checkbox"/> | 5 <input type="checkbox"/> |                            |
| <b>49.</b> I experience memory loss                 | 1 <input type="checkbox"/> | 2 <input type="checkbox"/> | 3 <input type="checkbox"/> | 4 <input type="checkbox"/> | 5 <input type="checkbox"/> |                            |
| <b>50.</b> I have trouble sleeping                  | 1 <input type="checkbox"/> | 2 <input type="checkbox"/> | 3 <input type="checkbox"/> | 4 <input type="checkbox"/> | 5 <input type="checkbox"/> |                            |
| <b>51.</b> I have trouble concentrating             | 1 <input type="checkbox"/> | 2 <input type="checkbox"/> | 3 <input type="checkbox"/> | 4 <input type="checkbox"/> | 5 <input type="checkbox"/> |                            |
| <b>52.</b> I always feel tired                      | 1 <input type="checkbox"/> | 2 <input type="checkbox"/> | 3 <input type="checkbox"/> | 4 <input type="checkbox"/> | 5 <input type="checkbox"/> |                            |
| <b>53.</b> I experience mood swings                 | 1 <input type="checkbox"/> | 2 <input type="checkbox"/> | 3 <input type="checkbox"/> | 4 <input type="checkbox"/> | 5 <input type="checkbox"/> |                            |
| <b>54.</b> I am often irritable                     | 1 <input type="checkbox"/> | 2 <input type="checkbox"/> | 3 <input type="checkbox"/> | 4 <input type="checkbox"/> | 5 <input type="checkbox"/> |                            |



## OVERALL SUPPORT AND CARE

1  
2  
3 **55.** Do you have an up-to-date written care  
4 plan? *A care plan is a document that sets*  
5 *out your needs and goals for caring for*  
6 *your cancer.*  
7

- 8 1  Yes, definitely  
9  
10 2  Yes, I think so  
11  
12 3  No  
13  
14 4  I do not need a care plan  
15  
16 5  Don't know  
17

18  
19 **56.** Do you have a named nurse who you can  
20 contact if you have a worry about your  
21 cancer care? *A named nurse is sometimes*  
22 *known as a Clinical Nurse Specialist or*  
23 *Specialist Cancer Nurse.*  
24

- 25  
26 1  Yes  
27  
28 2  No  
29  
30 3  Don't know  
31

32  
33 **57.** Do you know who to contact if you have a  
34 concern about any aspect of living with or  
35 after cancer?  
36

- 37 1  Yes, definitely  
38  
39 2  Yes, I think so  
40  
41 3  No  
42

43  
44 **58.** Do you think that hospital staff did  
45 everything they could to support you  
46 following your cancer treatment?  
47

- 48  
49 1  Yes, all of the time  
50  
51 2  Only some of the time  
52  
53 3  Never  
54  
55 4  I did not need any support  
56  
57  
58  
59  
60

**59.** Do you think that GPs and nurses at your  
general practice do everything they can to  
support you following your cancer  
treatment?

- 1  Yes, all of the time  
2  Only some of the time  
3  Never  
4  My general practice is not involved  
5  I do not need any support

**60.** Following your initial cancer treatment  
have you been given enough care and help  
from health and social services (for  
example, district nurses, home helps or  
occupational therapists)?

- 1  Yes, definitely  
2  Yes, to some extent  
3  No  
4  I did not need help from health or social  
services  
5  Don't know / can't remember

**61.** Would it have been helpful to have had  
more advice or information on any of the  
following issues: **(Tick all that apply)**

- 1  Diet and lifestyle  
2  Physical activity and exercise  
3  Financial help or benefits  
4  Free prescriptions  
5  Returning to or staying in work  
6  Information / advice for family / friends /  
carer  
7  The physical aspects of living with and  
after cancer (e.g. side effects or signs  
of recurrence)  
8  The psychological or emotional aspects  
of living with and after cancer  
9  I have all the information and advice I  
need



## ABOUT YOU

**If you are helping someone to complete this questionnaire, please make sure this information is the patient's and not your own.**

**62.** What year were you born?

(Please write in) e.g. 

|   |   |   |   |
|---|---|---|---|
| 1 | 9 | 4 | 4 |
|---|---|---|---|

|   |   |   |   |
|---|---|---|---|
| Y | Y | Y | Y |
|---|---|---|---|

**63.** Are you male or female?

- 1  Male  
2  Female

**64.** Which of the following best describes your sexual orientation?

- 1  Heterosexual / straight (opposite sex)  
2  Bisexual (both sexes)  
3  Gay or lesbian (same sex)  
4  Other  
5  Prefer not to answer

**65.** Which statement best describes your living arrangements?

- 1  I live with partner / spouse / family / friends  
2  I live alone  
3  I live in a nursing home, hospital or other long term care home  
4  Other

**66.** Do you have a long standing health condition? Please include anything **other than your cancer** that has troubled you over a period of time or that could affect you over a period of time.

- 1  Yes  
2  No  
3  Don't know / can't say

**67.** Which, if any, of the following conditions do you have? (Tick all that apply)

- 1  Alzheimer's disease or dementia  
2  Angina  
3  Arthritis  
4  Asthma or other chronic chest problem  
5  Blindness or visual impairment  
6  Deafness or hearing impairment  
7  Diabetes  
8  Epilepsy  
9  Heart condition  
10  High blood pressure  
11  Kidney disease  
12  Learning difficulty  
13  Liver disease  
14  Long term back problems  
15  Long-standing mental health problem  
16  Long-standing neurological problem  
17  Another long-standing condition  
18  I do not have any of these conditions

1 **68.** What was your employment status  
2 *before you were diagnosed with*  
3 *cancer?*

- 4  Full time employment  
5  
6  Part time employment  
7  
8  Homemaker  
9  
10  Student (in education)  
11  
12  Retired  
13  
14  Unemployed – and seeking work  
15  
16  Unemployed – unable to work for health  
17 reasons  
18  
19  Other  
20  
21

22 **69.** What is your employment status  
23 *currently? If on maternity or sick leave*  
24 *answer in relation to your usual*  
25 *employment status.*

- 26  
27  
28  Full time employment  
29  
30  Part time employment  
31  
32  Homemaker  
33  
34  Student (in education)  
35  
36  Retired  
37  
38  Unemployed – and seeking work  
39  
40  Unemployed – unable to work for health  
41 reasons  
42  
43  Other  
44  
45

46 **70.** If you are currently employed at the  
47 *moment, are you:*

- 48  
49  Not working at all  
50  
51  Working less hours than usual  
52  
53  Working your usual hours  
54  
55  Working more hours than usual  
56  
57  This question does not apply to me  
58  
59  
60

**71.** To which of these ethnic groups would  
you say you belong? (**Tick ONE only**)

**a. WHITE**

- 1  British  
2  Irish  
3  Any other White background  
(Please write in box)

**b. MIXED**

- 4  White and Black Caribbean  
5  White and Black African  
6  White and Asian  
7  Any other Mixed background  
(Please write in box)

**c. ASIAN OR ASIAN BRITISH**

- 8  Indian  
9  Pakistani  
10  Bangladeshi  
11  Any other Asian background  
(Please write in box)

**d. BLACK OR BLACK BRITISH**

- 12  Caribbean  
13  African  
14  Any other Black background  
(Please write in box)

**e. CHINESE OR OTHER ETHNIC GROUP**

- 15  Chinese  
16  Any other ethnic group  
(Please write in box)

## COMMENTS

If you have anything else you would like to tell us about living with and beyond cancer, please do so here:

For peer review only

Questions 4 - 8 are EQ-5D-5L. UK (English) v.2 © 2009 EuroQol Group. EQ-5D™ is a trade mark of the EuroQol Group.

Questions 9 – 23 are from FACIT. Copyright 1987, 1997 by David Cella, PhD

Questions 25 – 45 are from the Social Difficulties Inventory. Originators of the Social Difficulties Inventory: Wright, E.P., Cull, A. and Selby, P.

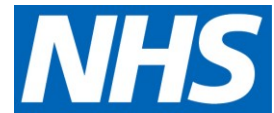

## Living with and beyond Prostate Cancer

This questionnaire is about your health and quality of life since being diagnosed with your cancer. Its purpose is to provide information which can help the NHS monitor and improve the quality of health services for future patients.

### Who should complete the questionnaire?

The questions should be answered by the person named in the letter enclosed with this questionnaire. If that person needs help to complete the questionnaire, the answers should be given from their point of view – not the point of view of the person who is helping.

### Completing the questionnaire

For each question please tick clearly inside the box that is closest to your views using a black or blue pen. Don't worry if you make a mistake; simply cross out the mistake and put a tick in the correct box. Please **do not** write your name or address anywhere on the questionnaire.

### IMPORTANT INFORMATION

To make sure the information we collect is useful, we need to collect some personal details from you and to access information held about you in other NHS databases. The purpose of collecting this information is to generate aggregated statistics about the quality of life for people who are living with and beyond cancer. These statistics will be used to compare the differences in quality of life for people treated for different types of cancer by different providers and to understand what may be causing these. The results will be used to measure and improve the quality of healthcare services.

**By completing this questionnaire you are giving your consent for the information provided to be used for the above purposes. Specifically, you are agreeing that:**

- Your personal details and relevant health information can be held and used by an organisation contracted to the Department of Health to analyse the data
- Other information about you held by the Patient Demographics Service, the Secondary Users Service, Cancer Registries and other NHS databases can be held and used by an organisation contracted to the Department of Health to analyse the data
- Your personal details can be used to send you related follow-up questionnaires in the future

Your personal information will be handled securely and anonymised after analysis and before any publication.

Your personal information will not be released by the Department of Health or third party organisations working on its behalf unless required by law or where there is a clear overriding public interest.

You can withdraw the information you give the NHS in this questionnaire upon request, up to the point at which data are analysed and personal details removed.

If you have any queries about the questionnaire,  
please call the FREEPHONE helpline number on **0800 783 1775**

**Taking part in this survey is voluntary**  
**Published reports will not contain any personal details**

## YOUR HEALTH TODAY

*The questions in this section are all about your health and how you feel on the day you complete this questionnaire.*

1. What treatments have you received for your prostate cancer? **(Tick all that apply)**

- 1  Radiotherapy (including brachytherapy) (with or without planned hormonal treatment)
- 2  Surgery
- 3  Hormone treatment
- 4  Chemotherapy (not including hormones)
- 5  HIFU
- 6  Cryotherapy
- 7  Active Surveillance (close monitoring but no current intervention)

2. How long is it since you completed your **initial treatment** for prostate cancer? *Treatment includes any chemotherapy, radiotherapy, or surgery for your prostate cancer. When answering this question please do not include hormone treatments.*

- 1  I am still having my initial treatment
- 2  It is less than 3 months since my initial treatment
- 3  It is between 3 and 12 months since my initial treatment
- 4  It is between 1 and 5 years since my initial treatment
- 5  It is more than 5 years since my initial treatment
- 6  Don't know / can't remember

3. How has your prostate cancer responded to treatment?

- 1  My prostate cancer has responded fully to treatment (I am in remission)
- 2  My prostate cancer has been treated but is still present
- 3  My prostate cancer has not been treated at all
- 4  My prostate cancer has come back after it was originally treated
- 5  I am not certain what is happening with my prostate cancer

# YOUR HEALTH TODAY

Under each heading, please tick the ONE box that best describes your health TODAY.

## 4. MOBILITY

- I have no problems in walking about <sub>1</sub>
- I have slight problems in walking about <sub>2</sub>
- I have moderate problems in walking about <sub>3</sub>
- I have severe problems in walking about <sub>4</sub>
- I am unable to walk about <sub>5</sub>

## 5. SELF CARE

- I have no problems washing or dressing myself <sub>1</sub>
- I have slight problems washing or dressing myself <sub>2</sub>
- I have moderate problems washing or dressing myself <sub>3</sub>
- I have severe problems washing or dressing myself <sub>4</sub>
- I am unable to wash or dress myself <sub>5</sub>

## 6. USUAL ACTIVITIES (*work, study, housework, family or leisure activities*)

- I have no problems doing my usual activities <sub>1</sub>
- I have slight problems doing my usual activities <sub>2</sub>
- I have moderate problems doing my usual activities <sub>3</sub>
- I have severe problems doing my usual activities <sub>4</sub>
- I am unable to do my usual activities <sub>5</sub>

## 7. PAIN / DISCOMFORT

- I have no pain or discomfort <sub>1</sub>
- I have slight pain or discomfort <sub>2</sub>
- I have moderate pain or discomfort <sub>3</sub>
- I have severe pain or discomfort <sub>4</sub>
- I have extreme pain or discomfort <sub>5</sub>

## 8. ANXIETY / DEPRESSION

- I am not anxious or depressed <sub>1</sub>
- I am slightly anxious or depressed <sub>2</sub>
- I am moderately anxious or depressed <sub>3</sub>
- I am severely anxious or depressed <sub>4</sub>
- I am extremely anxious or depressed <sub>5</sub>

For peer review only - <http://bmjopen.bmj.com/site/about/guidelines.xhtml>

# YOUR HEALTH AND WELLBEING IN THE LAST 7 DAYS

*The questions in this section are about your health and how you have felt in the past 7 days.*

Please mark one box per line to give your response.

| <i>During the past 7 days:</i>                                                                                                                                                                                                                                                                                                                                | Not at all                 | A little bit               | Some-what                  | Quite a bit                | Very much                  |                            |                            |                            |
|---------------------------------------------------------------------------------------------------------------------------------------------------------------------------------------------------------------------------------------------------------------------------------------------------------------------------------------------------------------|----------------------------|----------------------------|----------------------------|----------------------------|----------------------------|----------------------------|----------------------------|----------------------------|
| 9. I am losing weight                                                                                                                                                                                                                                                                                                                                         | 1 <input type="checkbox"/> | 2 <input type="checkbox"/> | 3 <input type="checkbox"/> | 4 <input type="checkbox"/> | 5 <input type="checkbox"/> |                            |                            |                            |
| 10. I have a good appetite                                                                                                                                                                                                                                                                                                                                    | 1 <input type="checkbox"/> | 2 <input type="checkbox"/> | 3 <input type="checkbox"/> | 4 <input type="checkbox"/> | 5 <input type="checkbox"/> |                            |                            |                            |
| 11. I have aches and pains that bother me                                                                                                                                                                                                                                                                                                                     | 1 <input type="checkbox"/> | 2 <input type="checkbox"/> | 3 <input type="checkbox"/> | 4 <input type="checkbox"/> | 5 <input type="checkbox"/> |                            |                            |                            |
| 12. I have certain parts of my body where I experience pain                                                                                                                                                                                                                                                                                                   | 1 <input type="checkbox"/> | 2 <input type="checkbox"/> | 3 <input type="checkbox"/> | 4 <input type="checkbox"/> | 5 <input type="checkbox"/> |                            |                            |                            |
| 13. My pain keeps me from doing things I want to do                                                                                                                                                                                                                                                                                                           | 1 <input type="checkbox"/> | 2 <input type="checkbox"/> | 3 <input type="checkbox"/> | 4 <input type="checkbox"/> | 5 <input type="checkbox"/> |                            |                            |                            |
| 14. I am satisfied with my present comfort level                                                                                                                                                                                                                                                                                                              | 1 <input type="checkbox"/> | 2 <input type="checkbox"/> | 3 <input type="checkbox"/> | 4 <input type="checkbox"/> | 5 <input type="checkbox"/> |                            |                            |                            |
| 15. I have trouble moving my bowels                                                                                                                                                                                                                                                                                                                           | 1 <input type="checkbox"/> | 2 <input type="checkbox"/> | 3 <input type="checkbox"/> | 4 <input type="checkbox"/> | 5 <input type="checkbox"/> |                            |                            |                            |
| 16. I have difficulty urinating                                                                                                                                                                                                                                                                                                                               | 1 <input type="checkbox"/> | 2 <input type="checkbox"/> | 3 <input type="checkbox"/> | 4 <input type="checkbox"/> | 5 <input type="checkbox"/> |                            |                            |                            |
| 17. I urinate more frequently than usual                                                                                                                                                                                                                                                                                                                      | 1 <input type="checkbox"/> | 2 <input type="checkbox"/> | 3 <input type="checkbox"/> | 4 <input type="checkbox"/> | 5 <input type="checkbox"/> |                            |                            |                            |
| 18. My problems with urinating limit my activities                                                                                                                                                                                                                                                                                                            | 1 <input type="checkbox"/> | 2 <input type="checkbox"/> | 3 <input type="checkbox"/> | 4 <input type="checkbox"/> | 5 <input type="checkbox"/> |                            |                            |                            |
| 19. I am able to have and maintain an erection                                                                                                                                                                                                                                                                                                                | 1 <input type="checkbox"/> | 2 <input type="checkbox"/> | 3 <input type="checkbox"/> | 4 <input type="checkbox"/> | 5 <input type="checkbox"/> |                            |                            |                            |
| 20. I leak urine                                                                                                                                                                                                                                                                                                                                              | 1 <input type="checkbox"/> | 2 <input type="checkbox"/> | 3 <input type="checkbox"/> | 4 <input type="checkbox"/> | 5 <input type="checkbox"/> |                            |                            |                            |
| 21. Do you have any difficulty in controlling your bowels (e.g. any accidents)?                                                                                                                                                                                                                                                                               | 1 <input type="checkbox"/> | No                         | 2 <input type="checkbox"/> | Yes                        |                            |                            |                            |                            |
|                                                                                                                                                                                                                                                                                                                                                               | Monthly                    | Weekly                     | Daily                      | Constantly                 | It varies                  |                            |                            |                            |
| 22. If yes, how often do you have difficulties?                                                                                                                                                                                                                                                                                                               | 1 <input type="checkbox"/> | 2 <input type="checkbox"/> | 3 <input type="checkbox"/> | 4 <input type="checkbox"/> | 5 <input type="checkbox"/> |                            |                            |                            |
| 23. In the <b>past week</b> , on how many days have you done a total of 30 minutes or more of physical activity, which was enough to raise your heart rate? <i>This may include sport, exercise and brisk walking or cycling for recreation or to get to and from places, but should not include housework or physical activity that is part of your job.</i> |                            |                            |                            |                            |                            |                            |                            |                            |
|                                                                                                                                                                                                                                                                                                                                                               | None                       | 1 day                      | 2 days                     | 3 days                     | 4 days                     | 5 days                     | 6 days                     | 7 days                     |
|                                                                                                                                                                                                                                                                                                                                                               | 1 <input type="checkbox"/> | 2 <input type="checkbox"/> | 3 <input type="checkbox"/> | 4 <input type="checkbox"/> | 5 <input type="checkbox"/> | 6 <input type="checkbox"/> | 7 <input type="checkbox"/> | 8 <input type="checkbox"/> |



## YOUR HEALTH AND WELL BEING IN THE LAST MONTH

**The questions in this section are about your health and how you have felt during the past month.**

Sometimes people who have, or have had cancer find that they have a number of everyday difficulties to cope with following their diagnosis. These might be to do with things like their family life, social activities, finances and work.

**Please tick the response that best describes your answer.**

| <i>During the past month:</i>                                                                                                                 | No<br>difficulty           | A little                   | Quite<br>a bit             | Very<br>much               | Does<br>not<br>apply       |
|-----------------------------------------------------------------------------------------------------------------------------------------------|----------------------------|----------------------------|----------------------------|----------------------------|----------------------------|
| 24. Have you had any difficulty in maintaining your independence?                                                                             | 1 <input type="checkbox"/> | 2 <input type="checkbox"/> | 3 <input type="checkbox"/> | 4 <input type="checkbox"/> | 5 <input type="checkbox"/> |
| 25. Have you had any difficulty in carrying out your domestic chores? (e.g. cleaning, gardening, cooking, shopping)                           | 1 <input type="checkbox"/> | 2 <input type="checkbox"/> | 3 <input type="checkbox"/> | 4 <input type="checkbox"/> | 5 <input type="checkbox"/> |
| 26. Have you had any difficulty with managing your own personal care? (e.g. bathing, dressing, washing)                                       | 1 <input type="checkbox"/> | 2 <input type="checkbox"/> | 3 <input type="checkbox"/> | 4 <input type="checkbox"/> | 5 <input type="checkbox"/> |
| 27. Have you had any difficulty with looking after those who depend on you? (e.g. children, dependent adults, pets)                           | 1 <input type="checkbox"/> | 2 <input type="checkbox"/> | 3 <input type="checkbox"/> | 4 <input type="checkbox"/> | 5 <input type="checkbox"/> |
| 28. Have any of those close to you (e.g. partner, children, parents) had any difficulty with the support available to them?                   | 1 <input type="checkbox"/> | 2 <input type="checkbox"/> | 3 <input type="checkbox"/> | 4 <input type="checkbox"/> | 5 <input type="checkbox"/> |
| 29. Have you had any difficulty with benefits? (e.g. statutory sick pay, attendance allowance, disability living allowance)                   | 1 <input type="checkbox"/> | 2 <input type="checkbox"/> | 3 <input type="checkbox"/> | 4 <input type="checkbox"/> | 5 <input type="checkbox"/> |
| 30. Have you had any financial difficulties?                                                                                                  | 1 <input type="checkbox"/> | 2 <input type="checkbox"/> | 3 <input type="checkbox"/> | 4 <input type="checkbox"/> | 5 <input type="checkbox"/> |
| 31. Have you had any difficulty with financial services? (e.g. loans, mortgages, pensions, insurance)                                         | 1 <input type="checkbox"/> | 2 <input type="checkbox"/> | 3 <input type="checkbox"/> | 4 <input type="checkbox"/> | 5 <input type="checkbox"/> |
| 32. Have you had any difficulty concerning your work? (or education if you are a student)                                                     | 1 <input type="checkbox"/> | 2 <input type="checkbox"/> | 3 <input type="checkbox"/> | 4 <input type="checkbox"/> | 5 <input type="checkbox"/> |
| 33. Have you had any difficulty with planning for your own or your family's future? (e.g. care of dependents, legal issues, business affairs) | 1 <input type="checkbox"/> | 2 <input type="checkbox"/> | 3 <input type="checkbox"/> | 4 <input type="checkbox"/> | 5 <input type="checkbox"/> |



# YOUR HEALTH AND WELL BEING IN THE LAST MONTH

1  
2  
3  
4  
5  
6  
7  
8  
9  
10  
11  
12  
13  
14  
15  
16  
17  
18  
19  
20  
21  
22  
23  
24  
25  
26  
27  
28  
29  
30  
31  
32  
33  
34  
35  
36  
37  
38  
39  
40  
41  
42  
43  
44  
45  
46  
47  
48  
49  
50  
51  
52  
53  
54  
55  
56  
57  
58  
59  
60

*During the past month:*

No difficulty      A little      Quite a bit      Very much      Does not apply

- 34. Have you had any difficulty with communicating with those closest to you? (e.g. partner, children, parents)      1       2       3       4       5
- 35. Have you had any difficulty with communicating with others? (e.g. friends, neighbours, colleagues, dates)      1       2       3       4       5
- 36. Have you had any difficulty concerning sexual matters?      1       2       3       4       5
- 37. Have you had any difficulty concerning plans to have a family?      1       2       3       4       5
- 38. Have you had any difficulty concerning your appearance or body image?      1       2       3       4       5
- 39. Have you felt isolated?      1       2       3       4       5
- 40. Have you had any difficulty with getting around? (e.g. transport, car parking, your mobility)      1       2       3       4       5
- 41. Have you had any difficulty with where you live? (e.g. space, access, damp, heating, neighbours, security)      1       2       3       4       5
- 42. Have you had any difficulty in carrying out your recreational activities? (e.g. hobbies, pastimes, social pursuits)      1       2       3       4       5
- 43. Have you had any difficulty with your plans to travel or take a holiday?      1       2       3       4       5
- 44. Have you had any difficulty with any other area of your everyday life?      1       2       3       4       5

## YOUR HEALTH AND WELL BEING IN THE LAST MONTH

*The questions in this section are about your health and how you have felt during the past month.*

Please tick the response that best describes your answer.

|                                              | Strongly agree             | Agree                      | Neither agree nor disagree | Disagree                   | Strongly disagree          | Does not apply to me       |
|----------------------------------------------|----------------------------|----------------------------|----------------------------|----------------------------|----------------------------|----------------------------|
| 45. I have fears about my cancer spreading   | 1 <input type="checkbox"/> | 2 <input type="checkbox"/> | 3 <input type="checkbox"/> | 5 <input type="checkbox"/> | 5 <input type="checkbox"/> | 6 <input type="checkbox"/> |
| 46. I have fears about my cancer coming back | 1 <input type="checkbox"/> | 2 <input type="checkbox"/> | 3 <input type="checkbox"/> | 5 <input type="checkbox"/> | 5 <input type="checkbox"/> | 6 <input type="checkbox"/> |
| 47. I have fears about death and dying       | 1 <input type="checkbox"/> | 2 <input type="checkbox"/> | 3 <input type="checkbox"/> | 5 <input type="checkbox"/> | 5 <input type="checkbox"/> |                            |
| 48. I experience memory loss                 | 1 <input type="checkbox"/> | 2 <input type="checkbox"/> | 3 <input type="checkbox"/> | 5 <input type="checkbox"/> | 5 <input type="checkbox"/> |                            |
| 49. I have trouble sleeping                  | 1 <input type="checkbox"/> | 2 <input type="checkbox"/> | 3 <input type="checkbox"/> | 5 <input type="checkbox"/> | 5 <input type="checkbox"/> |                            |
| 50. I have trouble concentrating             | 1 <input type="checkbox"/> | 2 <input type="checkbox"/> | 3 <input type="checkbox"/> | 5 <input type="checkbox"/> | 5 <input type="checkbox"/> |                            |
| 51. I always feel tired                      | 1 <input type="checkbox"/> | 2 <input type="checkbox"/> | 3 <input type="checkbox"/> | 5 <input type="checkbox"/> | 5 <input type="checkbox"/> |                            |
| 52. I experience mood swings                 | 1 <input type="checkbox"/> | 2 <input type="checkbox"/> | 3 <input type="checkbox"/> | 5 <input type="checkbox"/> | 5 <input type="checkbox"/> |                            |
| 53. I am often irritable                     | 1 <input type="checkbox"/> | 2 <input type="checkbox"/> | 3 <input type="checkbox"/> | 5 <input type="checkbox"/> | 5 <input type="checkbox"/> |                            |

## OVERALL SUPPORT AND CARE

1  
2  
3 **54.** Do you have an up-to-date written care  
4 plan? *A care plan is a document that sets*  
5 *out your needs and goals for caring for*  
6 *your cancer.*  
7

- 8 1  Yes, definitely  
9  
10 2  Yes, I think so  
11  
12 3  No  
13  
14 4  I do not need a care plan  
15  
16 5  Don't know  
17

18  
19 **55.** Do you have a named nurse who you can  
20 contact if you have a worry about your  
21 cancer care? *A named nurse is sometimes*  
22 *known as a Clinical Nurse Specialist or*  
23 *Specialist Cancer Nurse.*  
24  
25

- 26 1  Yes  
27  
28 2  No  
29  
30 3  Don't know  
31  
32

33 **56.** Do you know who to contact if you have a  
34 concern about any aspect of living with or  
35 after cancer?  
36

- 37 1  Yes, definitely  
38  
39 2  Yes, I think so  
40  
41 3  No  
42  
43  
44

45 **57.** Do you think that hospital staff did  
46 everything they could to support you  
47 following your cancer treatment?  
48

- 49 1  Yes, all of the time  
50  
51 2  Only some of the time  
52  
53 3  Never  
54  
55 4  I did not need any support  
56  
57  
58  
59  
60

**58.** Do you think that GPs and nurses at your  
general practice do everything they can to  
support you following your cancer  
treatment?

- 1  Yes, all of the time  
2  Only some of the time  
3  Never  
4  My general practice is not involved  
5  I do not need any support

**59.** Following your initial cancer treatment  
have you been given enough care and help  
from health and social services (for  
example, district nurses, home helps or  
occupational therapists)?

- 1  Yes, definitely  
2  Yes, to some extent  
3  No  
4  I did not need help from health or social  
services  
5  Don't know / can't remember

**60.** Would it have been helpful to have had  
more advice or information on any of the  
following issues: **(Tick all that apply)**

- 1  Diet and lifestyle  
2  Physical activity and exercise  
3  Financial help or benefits  
4  Free prescriptions  
5  Returning to or staying in work  
6  Information / advice for family / friends /  
carer  
7  The physical aspects of living with and  
after cancer (e.g. side effects or signs  
of recurrence)  
8  The psychological or emotional aspects  
of living with and after cancer  
9  I have all the information and advice I  
need

## ABOUT YOU

**If you are helping someone to complete this questionnaire, please make sure this information is the patient's and not your own.**

**61.** What year were you born?

(Please write in) e.g. 

|   |   |   |   |
|---|---|---|---|
| 1 | 9 | 4 | 4 |
|---|---|---|---|

|   |   |   |   |
|---|---|---|---|
| Y | Y | Y | Y |
|---|---|---|---|

**62.** Are you male or female?

- 1  Male
- 2  Female

**63.** Which of the following best describes your sexual orientation?

- 1  Heterosexual / straight (opposite sex)
- 2  Bisexual (both sexes)
- 3  Gay (same sex)
- 4  Other
- 5  Prefer not to answer

**64.** Which statement best describes your living arrangements?

- 1  I live with partner/spouse/family/friends
- 2  I live alone
- 3  I live in a nursing home, hospital or other long term care home
- 4  Other

**65.** Do you have a long standing health condition? *Please include anything **other than your cancer** that has troubled you over a period of time or that could affect you over a period of time.*

- 1  Yes
- 2  No
- 3  Don't know / can't say

**66.** Which, if any, of the following conditions do you have? **(Tick all that apply)**

- 1  Alzheimer's disease or dementia
- 2  Angina
- 3  Arthritis
- 4  Asthma or other chronic chest problem
- 5  Blindness or visual impairment
- 6  Deafness or hearing impairment
- 7  Diabetes
- 8  Epilepsy
- 9  Heart condition
- 10  High blood pressure
- 11  Kidney disease
- 12  Learning difficulty
- 13  Liver disease
- 14  Long term back problems
- 15  Long-standing mental health problem
- 16  Long-standing neurological problem
- 17  Another long-standing condition
- 18  I do not have any of these conditions

1  
2  
3  
4  
5  
6  
7  
8  
9  
10  
11  
12  
13  
14  
15  
16  
17  
18  
19  
20  
21  
22  
23  
24  
25  
26  
27  
28  
29  
30  
31  
32  
33  
34  
35  
36  
37  
38  
39  
40  
41  
42  
43  
44  
45  
46  
47  
48  
49  
50  
51  
52  
53  
54  
55  
56  
57  
58  
59  
60

**67.** What was your employment status *before you were diagnosed with cancer*?

- 1  Full time employment
- 2  Part time employment
- 3  Homemaker
- 4  Student (in education)
- 5  Retired
- 6  Unemployed – and seeking work
- 7  Unemployed – unable to work for health reasons
- 8  Other

**68.** What is your employment status currently? *If on maternity or sick leave answer in relation to your usual employment status.*

- 1  Full time employment
- 2  Part time employment
- 3  Homemaker
- 4  Student (in education)
- 5  Retired
- 6  Unemployed – and seeking work
- 7  Unemployed – unable to work for health reasons
- 8  Other

**69.** If you are currently employed at the moment, are you:

- 1  Not working at all
- 2  Working less hours than usual
- 3  Working your usual hours
- 4  Working more hours than usual
- 5  This question does not apply to me

**70.** To which of these ethnic groups would you say you belong? (Tick ONE only)

**a. WHITE**

- 1  British
- 2  Irish
- 3  Any other White background (Please write in box)

**b. MIXED**

- 4  White and Black Caribbean
- 5  White and Black African
- 6  White and Asian
- 7  Any other Mixed background (Please write in box)

**c. ASIAN OR ASIAN BRITISH**

- 8  Indian
- 9  Pakistani
- 10  Bangladeshi
- 11  Any other Asian background (Please write in box)

**d. BLACK OR BLACK BRITISH**

- 12  Caribbean
- 13  African
- 14  Any other Black background (Please write in box)

**e. CHINESE OR OTHER ETHNIC GROUP**

- 15  Chinese
- 16  Any other ethnic group (Please write in box)

## COMMENTS

If you have anything else you would like to tell us about living with and beyond cancer, please do so here:

1  
2  
3  
4  
5  
6  
7  
8  
9  
10  
11  
12  
13  
14  
15  
16  
17  
18  
19  
20  
21  
22  
23  
24  
25  
26  
27  
28  
29  
30  
31  
32  
33  
34  
35  
36  
37  
38  
39  
40  
41  
42  
43  
44  
45  
46  
47  
48  
49  
50  
51  
52  
53  
54  
55  
56  
57  
58  
59  
60



Questions 4-8 are EQ -5D-5L. UK (English) v.2 © 2009 EuroQol Group. EQ-5D™ is a trade mark of the EuroQol Group.

Questions 9 – 20 are taken from FACIT copyright 1987, 1997 by David Cella, PhD

Questions 24 – 44 are taken from the Social Difficulties Inventory. Originators of the Social Difficulties Inventory: Wright, E.P., Cull, A. and Selby, P.

For peer review only - <http://bmjopen.bmj.com/site/about/guidelines.xhtml>

# NIGB

## Ethics and Confidentiality Committee

*NIGB Office,  
Floor 7,  
New Kings Beam House,  
22 Upper Ground,  
London,  
SE1 9BW.*

*Tel: (020) 7633 7052*

*Email: eccapplications@nhs.net*

Simon Phillips  
Department of Health  
Room 403, Wellington House  
133 -155 Waterloo Road  
London  
SE1 8UG

18 May 2011

Dear Simon

### **8-05 (b)/2010 National Cancer Survivorship Initiative – patient reported outcome survey of cancer survivors**

Thank you for your application for support under section 251 of the NHS Act 2006 to process patient identifiable information without consent. This application was considered by the Ethics and Confidentiality Committee at its meeting on 01 December 2010.

#### **Context**

This application from the Department of Health (acting as sponsor) and Quality Health (the implementation provider) sought support to cover the pilot phase of a proposed national survey of cancer survivors, which is intended to last up until 30 June 2011.

**Update: due to slippages in timetables, it has been noted that following notification on 17 May 2011, that the survey will be completed by September 2011.**

The purpose of this activity was to aim to improve understanding of quality of life outcomes for cancer survivors and was intended to support the DH National Cancer Survivorship Initiative (NCSI). The activity would build upon the current national Cancer Patient Experience Survey Programme (CPESP) 2010 which focuses on the experience of care of cancer patients.

Section 251 support was sought to enable the legitimate transfer of patient data from the Cancer Registries to Quality Health, and for Quality Health to liaise with cancer centres so that patient questionnaires would be sent to patients under cover of appropriate cancer centre letter headed paper. Support was also required to enable a sample to be identified from the cancer registries. To carry out the activity, Quality Health would require access to name, address, sex, ethnic group, year of birth, NHS number, ICD10 code, speciality code, date of diagnosis, and Trust NACS code for most recent treatment spell.

#### **Outcome**

## Ethics and Confidentiality Committee

1  
2  
3  
4  
5  
6  
7 The letter dated 07 December 2010 set out the Committee's rationale and decision for its  
8 recommendation of provisional support, subject to a number of clarifications and conditions of  
9 approval. A response was subsequently provided providing copies of requested documentation  
10 and further explanation around the clarification areas.  
11

12 In particular, Members debated the response to the information being sent on GP headed paper,  
13 and on balance and in this specific instance, agreed that this would not be feasible.  
14

15 As all aspects have been satisfactorily addressed, this letter provides confirmation of your final  
16 approval, and our Register of approved applications will shortly be updated to include this  
17 application.  
18

19  
20  
21 If you have any queries regarding the outcome of this letter please do not hesitate to contact the  
22 NIGB Office on 020 7633 7052. Email queries should be sent to [eccapplications@nhs.net](mailto:eccapplications@nhs.net).  
23  
24

25  
26 Yours sincerely  
27  
28  
29

30 Natasha Dunkley  
31 **NIGB Approvals Manager**  
32  
33  
34  
35  
36  
37  
38  
39  
40  
41  
42  
43  
44  
45  
46  
47  
48  
49  
50  
51  
52  
53  
54  
55  
56  
57  
58  
59  
60



### Ethics and Confidentiality Committee Standard conditions of approval

The support provided under section 251 is subject to the following standard conditions.

The applicant will ensure that:

1. The requested patient identifiable information is only used for the purpose(s) set out in the application.
2. Confidentiality is preserved and that there is no disclosure of information in aggregate or patient level form that may inferentially identify a person, nor will any attempt be made to identify individuals, households or organisations in the data.
3. Requirements of the Statistics and Registration Services Act 2007 are adhered to regarding publication when relevant.
4. All staff with access to patient identifiable information have contractual obligations of confidentiality, enforceable through disciplinary procedures.
5. All staff with access to patient identifiable information have received appropriate ongoing training to ensure they are aware of their responsibilities.
6. Activities are consistent with the Data Protection Act 1998.
7. Audit of data processing by a designated agent of the Secretary of State is facilitated and supported.
8. The wishes of people who have withheld or withdrawn their consent are respected.
9. The NIGB Office is notified of any significant changes which impact on the approval of the application.
10. An annual review to be provided no later than 12 months from date of your final approval letter

STROBE 2007 (v4) Statement—Checklist of items that should be included in reports of cross-sectional studies

| Section/Topic             | Item # | Recommendation                                                                                                                                                                       | Reported on page # |
|---------------------------|--------|--------------------------------------------------------------------------------------------------------------------------------------------------------------------------------------|--------------------|
| Title and abstract        | 1      | (a) Indicate the study’s design with a commonly used term in the title or the abstract                                                                                               | 1                  |
|                           |        | (b) Provide in the abstract an informative and balanced summary of what was done and what was found                                                                                  | 2                  |
| <b>Introduction</b>       |        |                                                                                                                                                                                      |                    |
| Background/rationale      | 2      | Explain the scientific background and rationale for the investigation being reported                                                                                                 | 6                  |
| Objectives                | 3      | State specific objectives, including any prespecified hypotheses                                                                                                                     | 6                  |
| <b>Methods</b>            |        |                                                                                                                                                                                      |                    |
| Study design              | 4      | Present key elements of study design early in the paper                                                                                                                              | 7                  |
| Setting                   | 5      | Describe the setting, locations, and relevant dates, including periods of recruitment, exposure, follow-up, and data collection                                                      | 7                  |
| Participants              | 6      | (a) Give the eligibility criteria, and the sources and methods of selection of participants                                                                                          | 7                  |
| Variables                 | 7      | Clearly define all outcomes, exposures, predictors, potential confounders, and effect modifiers. Give diagnostic criteria, if applicable                                             | 8-10               |
| Data sources/ measurement | 8*     | For each variable of interest, give sources of data and details of methods of assessment (measurement). Describe comparability of assessment methods if there is more than one group | 8-10               |
| Bias                      | 9      | Describe any efforts to address potential sources of bias                                                                                                                            | 7-10               |
| Study size                | 10     | Explain how the study size was arrived at                                                                                                                                            | 7                  |
| Quantitative variables    | 11     | Explain how quantitative variables were handled in the analyses. If applicable, describe which groupings were chosen and why                                                         | 10                 |
| Statistical methods       | 12     | (a) Describe all statistical methods, including those used to control for confounding                                                                                                | 10                 |
|                           |        | (b) Describe any methods used to examine subgroups and interactions                                                                                                                  | 10                 |
|                           |        | (c) Explain how missing data were addressed                                                                                                                                          | 12                 |
|                           |        | (d) If applicable, describe analytical methods taking account of sampling strategy                                                                                                   | 10                 |
|                           |        | (e) Describe any sensitivity analyses                                                                                                                                                | 10                 |
| <b>Results</b>            |        |                                                                                                                                                                                      |                    |

|                          |     |                                                                                                                                                                                                              |       |
|--------------------------|-----|--------------------------------------------------------------------------------------------------------------------------------------------------------------------------------------------------------------|-------|
| Participants             | 13* | (a) Report numbers of individuals at each stage of study—eg numbers potentially eligible, examined for eligibility, confirmed eligible, included in the study, completing follow-up, and analysed            | 11    |
|                          |     | (b) Give reasons for non-participation at each stage                                                                                                                                                         | 11    |
|                          |     | (c) Consider use of a flow diagram                                                                                                                                                                           | n/a   |
| Descriptive data         | 14* | (a) Give characteristics of study participants (eg demographic, clinical, social) and information on exposures and potential confounders                                                                     | 11    |
|                          |     | (b) Indicate number of participants with missing data for each variable of interest                                                                                                                          | 12    |
| Outcome data             | 15* | Report numbers of outcome events or summary measures                                                                                                                                                         | 12-16 |
| Main results             | 16  | (a) Give unadjusted estimates and, if applicable, confounder-adjusted estimates and their precision (eg, 95% confidence interval). Make clear which confounders were adjusted for and why they were included | 13-15 |
|                          |     | (b) Report category boundaries when continuous variables were categorized                                                                                                                                    | 12-16 |
|                          |     | (c) If relevant, consider translating estimates of relative risk into absolute risk for a meaningful time period                                                                                             | n/a   |
| Other analyses           | 17  | Report other analyses done—eg analyses of subgroups and interactions, and sensitivity analyses                                                                                                               | 12-16 |
| <b>Discussion</b>        |     |                                                                                                                                                                                                              |       |
| Key results              | 18  | Summarise key results with reference to study objectives                                                                                                                                                     | 17-18 |
| Limitations              | 19  | Discuss limitations of the study, taking into account sources of potential bias or imprecision. Discuss both direction and magnitude of any potential bias                                                   | 19    |
| Interpretation           | 20  | Give a cautious overall interpretation of results considering objectives, limitations, multiplicity of analyses, results from similar studies, and other relevant evidence                                   | 17-19 |
| Generalisability         | 21  | Discuss the generalisability (external validity) of the study results                                                                                                                                        | 18    |
| <b>Other information</b> |     |                                                                                                                                                                                                              |       |
| Funding                  | 22  | Give the source of funding and the role of the funders for the present study and, if applicable, for the original study on which the present article is based                                                | 21    |

\*Give information separately for cases and controls in case-control studies and, if applicable, for exposed and unexposed groups in cohort and cross-sectional studies.

**Note:** An Explanation and Elaboration article discusses each checklist item and gives methodological background and published examples of transparent reporting. The STROBE checklist is best used in conjunction with this article (freely available on the Web sites of PLoS Medicine at <http://www.plosmedicine.org/>, Annals of Internal Medicine at <http://www.annals.org/>, and Epidemiology at <http://www.epidem.com/>). Information on the STROBE Initiative is available at [www.strobe-statement.org](http://www.strobe-statement.org).



**Patient Reported Outcomes of Cancer Survivors in England  
1 to 5 years after Diagnosis: a cross-sectional survey.**

|                                 |                                                                                                                                                                                                                                              |
|---------------------------------|----------------------------------------------------------------------------------------------------------------------------------------------------------------------------------------------------------------------------------------------|
| Journal:                        | <i>BMJ Open</i>                                                                                                                                                                                                                              |
| Manuscript ID:                  | bmjopen-2012-002317.R1                                                                                                                                                                                                                       |
| Article Type:                   | Research                                                                                                                                                                                                                                     |
| Date Submitted by the Author:   | 04-Feb-2013                                                                                                                                                                                                                                  |
| Complete List of Authors:       | Glaser, Adam; Leeds Teaching Hospitals NHS Trust, Department of Paediatric Oncology<br>Fraser, Lorna<br>Corner, Jessica<br>Feltbower, Richard<br>Morris, Eva<br>Hartwell, Greg<br>Richards, Sir Mike; Director, National Cancer Action Team, |
| <b>Primary Subject Heading</b>: | Oncology                                                                                                                                                                                                                                     |
| Secondary Subject Heading:      | Health policy, Public health, Research methods                                                                                                                                                                                               |
| Keywords:                       | Adult oncology < ONCOLOGY, Breast tumours < ONCOLOGY, Gastrointestinal tumours < ONCOLOGY, Lymphoma < ONCOLOGY, Urological tumours < ONCOLOGY                                                                                                |
|                                 |                                                                                                                                                                                                                                              |

SCHOLARONE™  
Manuscripts

only

**Title:**

**Patient Reported Outcomes of Cancer Survivors in England 1 to 5 years after Diagnosis: a cross-sectional survey.**

|                   |     |                                                                |
|-------------------|-----|----------------------------------------------------------------|
| Glaser Adam W     | DM  | Leeds Teaching Hospitals NHS Trust <sup>1</sup>                |
| Fraser Lorna K    | PhD | University of York <sup>2</sup>                                |
| Corner Jessica    | PhD | University of Southampton <sup>3</sup>                         |
| Feltbower Richard | PhD | University of Leeds <sup>4</sup>                               |
| Morris Eva JA     | PhD | University of Leeds <sup>5</sup>                               |
| Hartwell Greg     | MA  | Cancer Policy Team, Department of Health <sup>6</sup>          |
| Richards Mike     | MD  | Cancer Policy Team, Department of Health, England <sup>6</sup> |

1. Department of Paediatric Oncology, Martin Wing, Leeds General Infirmary, Great George Street, Leeds, LS1 3EX
2. Department of Health Sciences, Heslington, York, YO10 5DD
3. Faculty of Health Sciences, University of Southampton, Southampton, SO17 1BJ.
4. Division of Epidemiology, Level 8 Worsley Building, Leeds Institute of Genetics, Health & Therapeutics, University of Leeds, Leeds, UK
5. Section of Epidemiology & Biostatistics, Leeds Institute of Molecular Medicine, Level 6 Bexley Wing, St James's University Hospital, Leeds LS9 7TF
6. Cancer Policy Team, Department of Health, Wellington House, London, England.

**Corresponding Author:**

Adam Glaser

Address: Consultant Paediatric Oncologist, Department of Paediatric Oncology, D Floor, Martin Wing, Leeds General Infirmary, Great George Street, Leeds, LS1 3EX

Tel: 0113 3928779

Email: [adam.glaser@leedsth.nhs.uk](mailto:adam.glaser@leedsth.nhs.uk)

**Key Words:**

Cancer, Survivorship, Quality of Life, Patient Reported Outcomes, EQ5D, FACT

**Word Count:**

abstract: 302 & main body of paper: 4391

1  
2  
3 Abstract

4  
5 Objectives: To determine the feasibility of collecting population based patient reported  
6 outcome measures (PROMS) in assessing quality of life (QoL) to inform development of a  
7 national PROMS programme for cancer and to begin to describe outcomes in a UK cohort of  
8 survivors.  
9

10  
11  
12 Design: Cross-sectional postal survey of cancer survivors using a population-based sampling  
13 approach.  
14

15  
16  
17 Setting: English National Health Service.  
18

19  
20  
21 Participants: 4,992 breast, colorectal, prostate and Non-Hodgkin's Lymphoma survivors one  
22 to five years from diagnosis.  
23

24  
25 Primary and Secondary Outcome Measures: Implementation issues, response rates, cancer-  
26 specific morbidities utilising items including the EQ5D, tumour-specific sub-scales of the  
27 Functional Assessment of Cancer Therapy and Social Difficulties Inventory.  
28

29  
30  
31 Results:

32  
33 3,300 (66%) survivors returned completed questionnaires. The majority aged 85+ years did  
34 not respond and there was an effect of deprivation on response rates. Response rates did  
35 not differ by gender, time since diagnosis or cancer type.  
36

37  
38  
39 The presence of one or more long term conditions was associated with significantly lower  
40 QoL scores. Individuals from most deprived areas reported lower QoL scores and poorer  
41 outcomes on other measures, as did those self-reporting recurrent disease or uncertainty  
42 about disease status. QoL scores were stable at all time points for all cancers except NHL.  
43 QoL scores were lower than those from the general population in Health Survey for England  
44 (2008) and General Practice Patient Survey.  
45

46  
47  
48 47% of patients reported fear of recurrence whilst 20% reported moderate or severe  
49 difficulties with mobility or usual activities. Bowel and urinary problems were common  
50 among colorectal and prostate patients. Poor bowel and bladder control were significantly  
51 associated with lower QoL.  
52  
53  
54  
55  
56  
57  
58  
59  
60

1  
2  
3  
4  
5  
6 Conclusions: This method of assessing QoL of cancer survivors is feasible and acceptable to  
7 most survivors. Routine collection of national population- based PROMS will enable  
8 identification of, and support for, the specific needs of survivors whilst allowing for  
9 comparison of outcome by service provider.  
10  
11  
12  
13

### 14 15 16 17 **Funding**

18 This survey was funded by the Department of Health, England.  
19  
20  
21  
22  
23  
24  
25  
26  
27  
28  
29  
30  
31  
32  
33  
34  
35  
36  
37  
38  
39  
40  
41  
42  
43  
44  
45  
46  
47  
48  
49  
50  
51  
52  
53  
54  
55  
56  
57  
58  
59  
60

## Article Summary

### Article Focus

To determine the feasibility of routinely collecting population-based patient reported outcomes (PROMS) of cancer survivors to gather information on quality of life and cancer related morbidities that can be used to inform the development of a national PROMS programme for cancer.

### Key messages

- Collection of population-based information on quality of life from cohorts of cancer patients who are 1 to 5 years post diagnosis through cancer registries is feasible.
- The best quality of life was reported by those in remission and with no other long term conditions.
- Information obtained by widespread extension of this methodology will enable health economies to compare outcome across provider organisations and facilitate provision of enhanced services to meet the needs of cancer survivors.

### Strengths and Limitations

- Findings relate to the largest European survey of survivors of multiple cancer types at clearly defined time points from diagnosis.
- The study design eliminates many of the criticisms which have hindered the collection of population-based cancer patient reported outcome data in the past.
- English cancer registries provide a reliable denominator population from which to identify eligible participants.
- The questionnaires for the four cancer groups were identified as having face and content validity by a panel of health and social care professionals prior to use.
- Presence of multiple cancer groups, time points and some missing data may have resulted in a lack of power for certain analyses.



1  
2  
3  
4  
5  
6  
7  
8  
9  
10  
11  
12  
13  
14  
15  
16  
17  
18  
19  
20  
21  
22  
23  
24  
25  
26  
27  
28  
29  
30  
31  
32  
33  
34  
35  
36  
37  
38  
39  
40  
41  
42  
43  
44  
45  
46  
47  
48  
49  
50  
51  
52  
53  
54  
55  
56  
57  
58  
59  
60

- Selection bias may have arisen through differences in-response rates according to cancer group, deprivation category and age.
- The study excluded those treated in the private sector.

For peer review only

## Introduction

1.8 million people are living with and beyond a diagnosis of cancer in England and prevalence is predicted to increase by 3% per annum.<sup>1</sup> Cancer treatments are effectively reducing mortality and extending life, yet there is evidence that physical, psychological and social needs are not being addressed by the health and social care services, with individuals reporting significant unmet needs<sup>2</sup>. There is a lack of robust population-based information from which the prevalence, and impact, of disease and treatment associated morbidity burden can be ascertained and policy for appropriate interventions developed<sup>3</sup>. It has been equally difficult for health economies to compare the quality of health of those following treatment for cancer to those living with other long term conditions (LTC). These deficits have hampered the provision of comprehensive robust services for this growing population<sup>4</sup>.

In the United States a number of significant initiatives have been launched to systematically measure health outcomes in cancer survivors using patient reported outcome measures (PROMS) through the National Cancer Institute and American Cancer Society<sup>3 5-6</sup>. In Europe, at least one regional cancer register has started to collect PROMS via approaches made through the treating clinical teams<sup>7-8</sup>. The focus of PROMS work to date has been on refining treatment decision making for individuals and determining methodological approaches to implementation and analysis<sup>5-6 9-11</sup>. These efforts have yet to feed through into major national health system service improvement initiatives. The evaluation of patients' experiences of cancer care in England, through the National Cancer Patient Experience Survey, has resulted in care provider organisations and commissioners being able to identify areas of strengths and weakness in acute cancer care provision<sup>12</sup>.

Our objective was to determine the feasibility of routinely collecting population-based PROMS of cancer survivors (via a postal survey of individuals identified from cancer registry information), without introduction from clinicians or researchers known to participants, to gather information on quality of life (QoL) and cancer related morbidities that can be used to inform the development of a national PROMS programme for cancer.

## Methods

### *Study design*

A cross-sectional postal survey was undertaken of individuals with a diagnosis of breast, colorectal, non-Hodgkin's lymphoma (NHL) or prostate cancer one, two, three and five years earlier. These four time-points were chosen to gain an understanding of whether PROMS varied over time. Patients attending private healthcare centres were excluded as the aims of the study focused on the assessment of PROMS within the National Health Service (NHS) in England.

### *Cohort Identification and Survey Process*

Three cancer registries (Thames Cancer Registry, Eastern Cancer Registry and Information Centre, West Midlands Cancer Intelligence Unit) were chosen as representative examples of the eight cancer registries in England. They provided information on all relevant cancer diagnoses<sup>12</sup> (Supplementary File 1) between 01/02/2010-30/04/2010, 01/02/2009-30/04/2009, 01/02/2008-30/04/2008, and 01/02/2006-30/04/2006. The individual study cohorts for each cancer at time points one, two, three and five years from date of recorded diagnosis were compiled through identification of the 312 cases diagnosed most closely to a specified time-point (First of February for each year). Cases were excluded if: under the age of 16 years, deceased, or not known to have a UK address.

Identified participants were sent a questionnaire by post by the survey provider, *Quality Health*. This was sent under cover of a standard introductory letter with the letter-head of the cancer centre most recently recorded by the cancer registry as having provided treatment. The survey covered patients attending 70 of 160 (43%) acute NHS Trusts delivering cancer care in England during 2011. Patients consented to taking part in the survey by returning questionnaires and declined by not returning them, or by returning blank questionnaires. . Two reminders were sent to non-responders. Checks for deceased patients were undertaken by the registries at four separate time points in the survey process to ensure attempts were not made to contact deceased individuals.

1  
2  
3  
4  
5  
6  
7  
8  
9  
10  
11  
12  
13  
14  
15  
16  
17  
18  
19  
20  
21  
22  
23  
24  
25  
26  
27  
28  
29  
30  
31  
32  
33  
34  
35  
36  
37  
38  
39  
40  
41  
42  
43  
44  
45  
46  
47  
48  
49  
50  
51  
52  
53  
54  
55  
56  
57  
58  
59  
60

Details of a dedicated freephone telephone helpline, staffed 24 hours each day, were provided so the queries of any respondents could be resolved.

#### *Questionnaire design and content* (Supplementary files 2, 3, 4 and 5)

Questionnaires were developed for each cancer group. Content was identified through literature review, commissioned expert reviews<sup>13-15</sup>, consultation with patient groups, cancer charities and expert advisory groups. In this way the views of multi-professional clinicians and service users were captured.

Generic content included:

- Demographic and treatment-related questions adapted from the National Cancer Patient Experience Survey.<sup>12</sup>
- Self-reported response to treatment and disease status
- Amount of physical activity performed each week quantified according to the Chief Medical Officer of England's recommendations<sup>16</sup>.
- Presence or absence of long-term conditions (LTCs) other than cancer, using a list widely used in English Department of Health surveys.
- EQ5D: A 5 item generic health-related quality of life measure<sup>17-18</sup> chosen as it is a generic measure of health status widely used to evaluate population health in England<sup>17</sup>.
- Social Difficulties Inventory (SDI): A cancer survivor specific measure covering wider QoL domains<sup>19-20,21</sup> including information on the social consequences of cancer.
- Experience of care. Relevant items to these phases of the cancer pathway were taken from the National Cancer Patient Experience Survey Questionnaire.<sup>22</sup>
- Fear of recurrence and dying. These items were generated by the project team and cognitively tested on representative sample groups prior to this pilot survey.
- Individual components on psychological issues and work status identified through the literature as being important to cancer survivors but not covered by other components of the survey<sup>23, 24</sup>.

Tumour-specific content included

- Functional Assessment of Cancer Therapy (FACT) tumour specific components (FACT-B, FACT-C , FACT-Lym and FACT-P for breast, colorectal, NHL and prostate cancer respectively)<sup>25</sup>.

*A detailed description of the qualitative comments provided by respondents are reported in a parallel submission to the BMJ Open.*

Cognitive testing was performed on the four site-specific versions of the questionnaire prior to their general use. This was done by sending questionnaires to volunteers (identified through cancer charities and the survey provider) prior to participating in a telephone interview. This style of testing was used to determine the population's ability to complete the questionnaire independently and to follow routing and other instructions in the questionnaire without prompting or help. Appropriate alterations were then made to the questionnaire. The two required changes were omission of a similar item from the FACT-B and FACT-P questionnaires "I am able to feel like a woman" and "I am able to feel like a man".

#### *Data Handling/Analysis*

Age (at time of survey) was categorised as <55, 55-64, 65-74, 75-84, and  $\geq 85$  years. Self-reported ethnicity was grouped into white, asian, mixed, black and other. Deprivation category was based on the complete index of multiple deprivation (IMD)<sup>26</sup>. This was derived from the lower super output area (small census area) associated with their place of residence at the time of completing the survey, and used because the survey did not include questions related to income or educational level.

Participants were asked if they had any LTC other than their cancer diagnosis and were asked to tick the appropriate LTCs. This variable was categorised into 'no other', 'one other' and 'two or more LTCs'.

A crosswalk algorithm was used to convert the 5L EQ5D to the 3L version, allowing a weighted health score to be assigned for each individual.<sup>27</sup> United Kingdom population data were used to calculate weighted scores (range -0.5 to 1 [perfect health]). Due to skewness,

1  
2  
3 this outcome variable was categorised and ordered logistic regression undertaken. Three  
4 categories representing 'high', 'medium' and 'low' QoL scores were defined for ease of  
5 interpretation; these comprised scores equal to 1, less than 1 but greater than or equal to  
6 0.5 and less than 0.5. Odds ratios should be interpreted either as the odds of being in group  
7 2 (medium QoL scores) or group 3 (low QoL scores) compared to group 1 (high QoL scores)  
8 or the odds of being in group 3 (low QoL scores ) compared to group 1 or group 2.  
9  
10  
11  
12  
13

14  
15 Cancer-specific questions from FACT<sup>25</sup> were used as explanatory variables in this analysis  
16 (FACT total score could not be calculated as only the cancer-specific subscale questions  
17 were included). Patient reported treatments were used in the analyses and treatment  
18 combinations were categorised for each cancer site with the most common used as the  
19 reference group. Given the study design, participants who had survived a year or more and  
20 who reported still receiving treatments when they completed the survey were likely to be  
21 receiving treatment for advanced or recurrent disease.  
22  
23  
24  
25  
26  
27  
28

### 29 *Statistical methods*

30  
31 Chi-squared tests were used to compare categorical variables. Descriptive statistics were  
32 compared across cancer sites but the statistical models were stratified by cancer site.  
33 Variables were entered into the logistic regression model based on their *a priori* clinical and  
34 public health importance after agreement by the study investigators. Formal variable  
35 selection procedures were not invoked primarily due to statistical problems associated with  
36 these data-driven procedures<sup>28</sup> and, secondly, so that findings could be compared  
37 consistently across cancer sites and time points. Statistical significance was set at 1% to  
38 minimise the chances of false-positive associations. All analyses were undertaken using  
39 STATA v12.1.  
40  
41  
42  
43  
44  
45  
46  
47  
48

### 49 *Ethics and governance*

50  
51 Approval was given to approach patients without informed consent by the National  
52 Information Governance Board (Supplementary File 6) as the study was performed as  
53 service evaluation<sup>29</sup>.  
54  
55  
56  
57  
58  
59  
60

## Results

### *Participants*

Questionnaires were sent to 4992 individuals, 126 (2.5%) of these had moved or died prior to receiving the questionnaire resulting in a final sample size of 4866. 3300 completed questionnaires were received (66% of the study sample). Of the surveys received by participants, the response rate was 68% (3300/4866).

### *Response rates*

Response rate varied significantly between cancer groups (Table 1a): 69.4% in the prostate group compared to 62.3% in the NHL group ( $p < 0.001$ ).

There was significant difference in the age structure of the non-responders vs. responders with a higher proportion of non-responders in the  $\geq 85$  years age group ( $p < 0.001$ ).

Response rates differed according to deprivation status (Table 1a) with a response rate of 71.4% in the least deprived category compared to 57.1% in the most deprived category ( $p < 0.001$ ).

No difference in response rates by time since diagnosis, sex or cancer type was found.

### *Demographics of respondents (Table 1b)*

Overall there were more males than females. Median age was 69 years (range 36-102). There was significant variation in the distribution of ethnicity by cancer group with higher proportions of non-white ethnic groups with NHL. There was no significant difference by deprivation between cancer groups. Overall more than half of patients reported having a LTC. There were fewer reported LTCs in the breast cohort than in other groups but this did not reach statistical significance.

### *Missing data*

Missing data levels were extremely low, typically less than 5% for most fields. SDI had slightly higher levels of missing data with completeness ranging from 80-85%. For the regression modelling (Tables 3a-3d) which used complete case analysis approach, completeness levels were lower and ranged from 60% (colorectal, prostate) to 83% (breast). There was no evidence that the prevalence of missing data was related to the order of the questions after examining levels of completeness for questions at the beginning compared to the end of the form.

### *Helpline calls and other contact from survey participants*

64 calls were made to the helpline, whilst further information about patient status was received via letters from patients (11) and NHS Trusts (2). The total number of enquiries was 77, representing 0.02% of the study cohort.

### *Generic PROMS*

Responses for the five EQ5D questions demonstrated that a higher percentage of NHL patients reported problems with self-care, mobility and usual activities. Two-thirds of breast cancer patients reported some degree of pain (Supplementary Table 1).

When detailed responses for the five EQ5D questions were summarised by time since diagnosis, there were no significant differences for pain, mobility, usual activities or self-care but the percentage reporting anxiety or depression symptoms decreased significantly ( $p=0.01$ ) (Supplementary Table 2).

Skewed weighted health scores were obtained from the EQ5D by cancer group (Supplementary Figure 1). The prostate group had significantly higher median (0.88) scores than the other three groups (0.84) ( $p=0.001$ ). The proportion of the populations reporting high QoL scores ranged from 24.4% for breast to 40.0% for prostate cancer (Table 2). Conversely, the proportion reporting low QoL scores ranged from 8.9% for breast to 13.1% for NHL. For all tumour groups, irrespective of remission status, the percentage of



1  
2  
3 individuals reporting lower QoL scores increased as the number of other LTCs increased  
4 (Supplementary Tables 3-4).  
5  
6  
7

### 8 *Result by Tumour Type*

9  
10 Multivariable ordered logistic regression (Tables 3a-3d) identified three factors which were  
11 consistently associated with lower QoL scores irrespective of tumour type: presence of LTCs,  
12 undertaking little physical activity and self-reported disease status.  
13  
14

### 15 *Breast Cancer (Table 3a)*

16  
17 Increasing number of LTCs, having recurrence of disease or being uncertain of disease status  
18 were associated with poorer outcomes across all three measures: The presence of one (OR  
19 1.84, 95%CI 1.25,2.70) or two or more (Odds Ratio (OR) 7.30, 95%Confidence Interval (CI)  
20 4.45,11.93) LTCs was significantly associated with lower QoL scores. Individuals self-  
21 reporting recurrent disease (OR 4.70, 95%CI 1.92,11.52) or those uncertain about their  
22 disease status (OR 2.51, 95%CI 1.27,4.96) were significantly more likely to report lower QoL  
23 scores compared to those self-reporting remission.  
24  
25  
26  
27  
28  
29  
30  
31

32  
33 Increasing age (apart from those aged 85 years or older) and more days undertaking  
34 physical activity were significantly associated with better outcomes in EQ5D, SDI and FACT-B  
35 measures: Those aged 65-74 reported significantly higher QoL scores compared to under  
36 55s (OR 0.36, 95%CI 0.22,0.58). Increasing physical activity was associated with higher QoL  
37 scores with each additional reported day per week of physical activity reducing the odds of a  
38 lower score by 12% (OR 0.88, 95%CI 0.82,0.95).  
39  
40  
41  
42  
43  
44

45  
46 Individuals from the most deprived areas were significantly more likely to report lower  
47 EQ5D derived QoL scores than those from the most affluent areas (OR 3.00, 95%CI 1.64-  
48 5.50). Poorer outcomes in FACT-B items were associated with being in the most deprived  
49 category.  
50  
51  
52

### 53 *Colorectal Cancer (Table 3b)*

54  
55 The presence of one (OR 2.09, 95%CI 1.29,3.37) or two or more (OR 4.83, 95%CI 2.85,8.21)  
56 LTCs was significantly associated with lower QoL scores. Those who completed the  
57  
58  
59

1  
2  
3 questionnaire whilst undergoing treatment (OR 7.03, 95%CI 2.44,20.21), experiencing  
4 recurrent disease (OR 4.56, 95%CI 1.54,13.49) or who were uncertain about their disease  
5 status (OR 2.67, 95%CI 1.23,5.79) had significantly increased odds of reporting lower QoL  
6 scores compared to those reporting remission.  
7  
8  
9

10  
11 Increasing physical activity was significantly associated with a 17% decrease in the odds of a  
12 lower QoL score with each additional day per week of physical activity (OR 0.83, 95%CI  
13 0.76,0.90).  
14  
15  
16  
17

18  
19 23.5% reported urinary leakage, 19.0% difficulty controlling their bowels and 19.2% had a  
20 stoma. Individuals experiencing any difficulty controlling their bowels were more than twice  
21 as likely to report lower QoL scores (OR 2.30, 95%CI 1.43,3.72). The presence of a stoma or  
22 urinary leakage was not significantly associated with QoL.  
23  
24  
25  
26

27  
28 Greater difficulties with holidays and travel were reported by those with colorectal cancer  
29 compared to other cancers. For example, only 51% of colorectal respondents reporting no  
30 difficulty compared to 64% with breast or prostate cancer.  
31  
32  
33

### 34 35 *Non-Hodgkin's Lymphoma (Table 3c)*

36 The presence of one (OR 2.16, 95%CI 1.44,3.24) or two or more (OR 7.26, 95%CI 4.51,11.69)  
37 LTCs was significantly associated with lower QoL scores. Those currently being treated (OR  
38 2.57, 95%CI 1.52,4.33), experiencing a recurrence (OR 3.73, 95%CI 1.68,8.29) or who were  
39 not sure about their disease status (OR 3.04, 95%CI 1.58,5.84) had increased odds of  
40 reporting lower QoL scores compared to those in remission. These same factors were  
41 associated with poorer outcomes on the SDI and FACT-Lym items.  
42  
43  
44  
45  
46  
47

48  
49 A significant positive association between increasing physical activity and QoL was seen with  
50 each additional day of physical activity reducing the odds of lower QoL score by 9% (OR  
51 0.91, 95%CI 0.84,0.98). QoL seemed to improve with time from diagnosis for NHL but the  
52 trend was not significant ( $p=0.100$ ).  
53  
54  
55  
56  
57  
58  
59  
60

### *Prostate Cancer (Table 3d)*

The presence of two or more LTCs (OR 4.28, 95%CI 2.62,7.01) or being in the most deprived category (OR 2.57, 95%CI 1.31,5.04) were significantly associated with lower QoL scores, as well as increased social distress and difficulties identified by FACT-P.

Patients who had surgery only (compared to radiotherapy and hormone treatment) had significantly higher QoL scores (OR 0.39, 95%CI 0.21,0.71) as did those reporting more days of physical activity (OR 0.82, 95%CI 0.75,0.88).

38.5% of prostate patients reported some degree of urinary leakage, 12.9% reported difficulty controlling their bowels and 58.4% reported being unable to have an erection with a further 11% reporting significant difficulty in having or maintaining an erection. The presence of urinary leakage was significantly associated with lower QoL scores (OR 3.52, 95%CI 2.32,5.35). Erectile dysfunction and difficulty controlling bowels were not significantly associated with QoL scores.

Prostate survivors had significantly lower overall social distress scores on the SDI as well as fewer problems in all three sub-scales (everyday living, money matters, self and others) compared to other cancer types.

### *Fear of recurrence and dying*

Almost half (47.3%) of patients reported fear of recurrence and a quarter (26.8%) reported fear of dying (Supplementary Table 5). Both of these fears decreased significantly with time since diagnosis.

### *Physical activity*

Around one-fifth (21.4%) of participants reported taking 30 minutes or more of physical activity at least five days a week (in line with the Chief Medical Officer's recommendations). This varied by cancer: 16.5% for NHL, 19.0% for breast, 20.2% for colorectal and 29.0% for prostate. Overall 29.8% of patients reported doing no physical activity; this varied by cancer

1  
2  
3 group with 33·5% of NHL, 31·5% of colorectal and 27·4% of both breast and prostate  
4 survivors doing no physical activity.  
5  
6  
7  
8  
9  
10  
11  
12  
13  
14  
15  
16  
17  
18  
19  
20  
21  
22  
23  
24  
25  
26  
27  
28  
29  
30  
31  
32  
33  
34  
35  
36  
37  
38  
39  
40  
41  
42  
43  
44  
45  
46  
47  
48  
49  
50  
51  
52  
53  
54  
55  
56  
57  
58  
59  
60

For peer review only

## Discussion

This study represents the largest European survey of survivors of multiple cancer types at clearly defined time points from diagnosis and demonstrates the feasibility of this straightforward method of collecting informative self-reported PROMS data on population-based cohorts of individuals living with and beyond a diagnosis of cancer in England. The process eliminates many of the potential biases that have hindered the collection of population-based cancer PROMS data in the past originating from the use of clinical trial data or acute service provider units for recruitment<sup>30</sup>. English cancer registries, which capture approximately 98-99% of all cancers diagnosed in England<sup>31</sup>, provide a reliable denominator population from which to identify eligible participants.

### *Acceptability and Validity*

The relatively high response rate, low level of missing data and low number of calls to the dedicated 24 hour helpline suggest that the methodology is acceptable to the majority of participants. However, the finding of lower participation amongst the elderly or those residing in areas with the greatest socio-economic deprivation would suggest that individuals from these vulnerable groups may need to be assessed by alternative methods. Whilst the questionnaires were identified as having face and content validity by a panel of health and social care professionals prior to use this study does not permit us to comment on the responsiveness or reliability of the instruments. However, the core components of the questionnaires had been identified by independent review as being reliable and appropriate for use in this setting<sup>13-15</sup>.

### *Key results*

The QoL of survivors for all four cancers was significantly related to self-reported disease status (remission versus relapse/uncertain), age and presence of LTCs. QoL appeared to either remain constant or improve slightly as time from diagnosis increased. This suggests that some problems experienced by cancer patients persist for long periods.

1  
2  
3 We have quantified the community prevalence of previously known late morbidities and  
4 assessed their impact on QoL. Problems relating to urinary and bowel control have been  
5 shown to be common, with nearly 40% of prostate survivors reporting urinary leakage and  
6 13% difficulty controlling their bowels. Similarly, amongst colorectal survivors nearly a  
7 quarter reported urinary leakage and 19% reported difficulty controlling their bowels.  
8 These rates are comparable to other studies of cancer patients<sup>32</sup> but exceed those seen in  
9 non-cancer populations where the prevalence of urinary incontinence in adult men was  
10 4.5% overall, rising to 16.0% for over 75 year olds<sup>33</sup>. In this study, the presence of “urinary  
11 leakage” in prostate survivors and “of difficulty controlling their bowels” in colorectal  
12 survivors were significantly associated with lower QoL scores making such symptoms  
13 important to address. Erectile dysfunction in prostate survivors, though common, did not  
14 significantly impact on QoL. The finding that QoL or physical problems such as difficulty  
15 controlling bowels or incontinence do not appear to be less prevalent five years following  
16 treatment may suggest individuals are not receiving adequate help or treatment for these  
17 conditions. Greater efforts should be made in prevention and early intervention for  
18 problems resulting from cancer treatment, and directed at those most at risk of the long-  
19 term problems identified from this study.  
20  
21  
22  
23  
24  
25  
26  
27  
28  
29  
30  
31  
32  
33  
34

#### 35 *Comparison with the General Population Data*

36 Most survivors in this study who were in remission and did not report a LTC were found to  
37 have a high QoL score. However, even the subgroup in remission with no LTC reported  
38 lower QoL scores than the data available from general population studies (Table 4). Some of  
39 this difference may be accounted for by age, as the Health Survey for England (2008)<sup>34</sup> and  
40 the General Practice Patient Survey (GPPS)<sup>35</sup> cohorts were substantially younger than the  
41 reported cancer study cohort. This assumption is supported from the HSE cohort aged over  
42 45 years (median age 63, n=7672) which reported a reduction in QoL scores (good 45%,  
43 moderate 46%, poor 9%).  
44  
45  
46  
47  
48  
49  
50  
51  
52

#### 53 *Long-term Conditions*

54  
55  
56 The presence of one or more LTCs, other than their cancer diagnosis, was associated with  
57 lower QoL scores in all four cancer groups and mirrors findings from other studies<sup>2 36</sup>. The  
58  
59  
60

1  
2  
3 presence of multi-morbidity and LTCs identifies sub-sets of survivors who may require more  
4 active support than others. This needs to be factored into risk stratification models as  
5 health services move away from hospital based cancer follow-up towards a greater focus on  
6 self-management.  
7  
8  
9

### 10 11 *Physical Activity*

12 The extent to which cancer survivors take physical activity has not previously been reported  
13 in England. The findings agree with those from the USA<sup>37</sup>, suggesting that prostate survivors  
14 are more likely than others to take moderate or vigorous physical activity. We observed an  
15 association between higher levels of activity and higher QoL scores, but it is not possible to  
16 assess from a cross-sectional survey whether there is a causal relationship.  
17  
18  
19  
20  
21  
22  
23

24 A smaller percentage of study respondents (21.4%) met the Chief Medical Officer of  
25 England's recommendations for physical activity when compared with the HSE(2008) in  
26 which 34% of adults met these guidelines<sup>34</sup>. Restricting the HSE data to a similar age profile  
27 as the study participants (60-75 years) saw similar levels of physical activity (23%). The HSE  
28 data found a trend of decreased physical activity with increasing age, yet, in this study,  
29 prostate survivors (the oldest subgroup) reported higher physical activity levels.  
30  
31  
32  
33  
34  
35  
36

### 37 *Limitations*

38 The presence of multiple cancer groups and time points, along with some missing data  
39 (typically <5%), may have resulted in a lack of power for certain analyses. For example,  
40 investigating whether the quality of life of those living with recurrent disease differed from  
41 those survivors who had been 'cured'. The non-response rate varied significantly by cancer  
42 group, deprivation category and age, which could result in selection bias when generalising  
43 results. To overcome bias associated with deprivation and age, we propose extension of the  
44 pilot study to the largest possible cohorts available nationally; analyses and interpretation of  
45 this data will be performed with maximum sensitivity to these areas.  
46  
47  
48  
49  
50  
51  
52  
53

54 Our study excluded those treated in the private sector (estimated to be under 5% of cancer  
55 cases in England<sup>38</sup>). Treatments may also have changed over the 1-5 year period used to  
56 select survivors and it is therefore possible the results reflect these changes.  
57  
58  
59  
60

1  
2  
3 The study relied on self-reporting of long-term conditions, response to treatment and  
4 disease status. This information was not independently verified.  
5  
6

7  
8 The highly skewed EQ5D outcome variable was categorised into three levels for  
9 multivariable modelling, which is not a standard approach and meant that information and  
10 perhaps discriminatory power was lost. However, our model parameterisation enabled a  
11 more natural interpretation of EQ5D QoL data and when comparisons were made with  
12 other alternative models, such as tobit regression, findings were very similar. We also  
13 acknowledge that measures related to the FACT component are primarily intended for use  
14 around the time of treatment rather than for survivorship work. Space limitations precluded  
15 a more detailed description of results incorporating the FACT and SDI components.  
16 However, a comprehensive report including these additional findings has been compiled  
17 and can be accessed via the DH website  
18  
19  
20  
21  
22  
23  
24  
25  
26  
27  
28  
29  
30  
31  
32  
33  
34  
35  
36  
37  
38  
39  
40  
41  
42  
43  
44  
45  
46  
47  
48  
49  
50  
51  
52  
53  
54  
55  
56  
57  
58  
59  
60  
(<https://www.wp.dh.gov.uk/publications/files/2012/12/9284-TSO-2900701-PROMS.pdf>).

#### *Where next for Cancer PROMS in England?*

31  
32  
33  
34  
35  
36  
37  
38  
39  
40  
41  
42  
43  
44  
45  
46  
47  
48  
49  
50  
51  
52  
53  
54  
55  
56  
57  
58  
59  
60  
The use of cancer PROMS has generally been restricted to clinical research, especially  
clinical trials or small studies. Whilst important work has been undertaken to develop  
approaches for the measurement of PROMS, they have not been incorporated into routine  
measurement at a whole health system level. This study demonstrates that population-  
based survey approaches are feasible and yield acceptable response rates. This approach  
could provide important insights into where improvement efforts should be targeted to  
reduce the long-term burden of cancer and its treatments on the growing number of cancer  
survivors.

Improving QoL in patients with LTC is one of the key goals of English government health  
policy (forming Domain 2 of the NHS Outcomes Framework)<sup>39</sup>. The approach we report  
should be scaled up and integrated within routine health outcome assessment on a national  
basis so that results can be distilled down to hospital/service provider level, as has been  
done in relation to the experience of acute care of cancer patients<sup>12</sup>. Improvements in  
quality of survivor care could then be driven by publishing hospital/provider level data. As a  
result of the findings of this pilot, a national roll-out to all individuals diagnosed 1-3 years



1  
2  
3 earlier with colorectal cancer in England is being performed in January 2013. A similar roll-  
4 out to those diagnosed with prostate cancer is planned whilst pilot questionnaires for those  
5 with bladder, cervical, endometrial and ovarian cancer are being prepared. To further  
6 understand the developmental trajectory of morbidity burden, a longitudinal survey of  
7 respondents to the pilot is being undertaken, with a survey 1 year on having been  
8 undertaken and consideration for a further data collection point after another 12 months.  
9

10  
11  
12  
13  
14  
15 Our findings support the on-going international efforts to identify risk factors for poor  
16 health-related QoL outcomes following a cancer diagnosis. These include the presence of  
17 other LTCs, deprivation and limited physical activity. These, along with the high prevalence  
18 of on-going condition-specific problems such as bowel, urinary and erectile dysfunction,  
19 warrant attention by cancer services.  
20  
21  
22  
23  
24  
25  
26  
27  
28  
29  
30  
31  
32  
33  
34  
35  
36  
37  
38  
39  
40  
41  
42  
43  
44  
45  
46  
47  
48  
49  
50  
51  
52  
53  
54  
55  
56  
57  
58  
59  
60

### *Acknowledgements*

Dr Nicola Davies, Professor Jane Maher, Dr Mick Peake, Professor Galina Velikova and Dr Penny Wright provided expert advice regarding questionnaire and study design. Thames Cancer Registry, Eastern Cancer Registry and Information Centre, and West Midlands Cancer Intelligence Unit provided information on all eligible cancer survivors. FACIT provided permission to use components of the FACT questionnaires and Penny Wright granted permission to use the Social Difficulties Inventory.

### *Funding*

This survey was funded by the Department of Health, England.

Open source access for BMJ Open was funded through a grant from Macmillan Cancer Support.

### *Declaration of Competing Interests*

All authors have completed the Unified Competing Interest form at [www.icmje.org/coi\\_disclosure.pdf](http://www.icmje.org/coi_disclosure.pdf) (available on request from the corresponding author) and declare: financial support for the submitted work from the Department of Health, England: AWG, GH and MR were employed by the Cancer Policy Team, Department of Health, England, whilst the research was carried out; AWG, LKF, RGF and EF, received financial support from Department of Health, England, to carry out the analysis of data reported; JC and MR co-chaired the Department of Health, England, Cancer Patient Experience Advisory Group.

### *Data Sharing Statement*

Statistical code and dataset are available from the corresponding author at the University of Leeds, who will provide a permanent, citable and open access home for the dataset.

### *Author Contribution Statement*

Adam Glaser contributed to the study design, data collection, data analysis, data interpretation and writing of this manuscript.

Lorna Fraser contributed to the data analysis, data interpretation and writing of this manuscript.

1  
2  
3 Jessica Corner contributed to the study design, data collection, data interpretation and  
4 writing of this manuscript.  
5

6 Richard Feltbower contributed to the data analysis, data interpretation and writing of this  
7 manuscript.  
8

9  
10 Eva Morris contributed to the data analysis, data interpretation and writing of this  
11 manuscript.  
12

13  
14 Greg Hartwell contributed to the study design and data collection.

15  
16 Mike Richards contributed to the study design, data interpretation, and writing of this  
17 manuscript.  
18

19  
20  
21 Copyright/licence for publication statement  
22

23  
24 “The Corresponding Author has the right to grant on behalf of all authors and does grant on  
25 behalf of all authors, a worldwide licence to the Publishers and its licensees in perpetuity, in  
26 all forms, formats and media (whether known now or created in the future), to i) publish,  
27 reproduce, distribute, display and store the Contribution, ii) translate the Contribution into  
28 other languages, create adaptations, reprints, include within collections and create  
29 summaries, extracts and/or, abstracts of the Contribution, iii) create any other derivative  
30 work(s) based on the Contribution, iv) to exploit all subsidiary rights in the Contribution, v)  
31 the inclusion of electronic links from the Contribution to third party material where-ever it  
32 may be located; and, vi) licence any third party to do any or all of the above.”  
33  
34  
35  
36  
37  
38  
39  
40  
41  
42  
43  
44  
45  
46  
47  
48  
49  
50  
51  
52  
53  
54  
55  
56  
57  
58  
59  
60

Table 1a Demographic data of responders and non-responders

| Characteristic                  |                                                        | Responders<br>(n=3300) |      | Non Responders<br>(n=1692) |      | Total<br>number<br>approached | Overall<br>Percentage<br>Responding |
|---------------------------------|--------------------------------------------------------|------------------------|------|----------------------------|------|-------------------------------|-------------------------------------|
|                                 |                                                        | n                      | %    | n                          | %    |                               |                                     |
| <b>Cancer<br/>Group</b>         | <b><math>\chi^2=18.8,</math><br/><b>p&lt;0.001</b></b> |                        |      |                            |      |                               |                                     |
| Breast                          |                                                        | 854                    | 25.9 | 394                        | 23.3 | 1248                          | 68.4                                |
| Colorectal                      |                                                        | 802                    | 24.3 | 446                        | 26.4 | 1248                          | 64.3                                |
| NHL                             |                                                        | 778                    | 23.6 | 470                        | 27.8 | 1248                          | 62.3                                |
| Prostate                        |                                                        | 866                    | 26.2 | 382                        | 22.5 | 1248                          | 69.4                                |
| <b>Age</b>                      | <b><math>\chi^2=108,</math><br/><b>p&lt;0.001</b></b>  |                        |      |                            |      |                               |                                     |
| under 55                        |                                                        | 467                    | 14.2 | 282                        | 16.7 | 749                           | 62.3                                |
| 55 to 64                        |                                                        | 692                    | 21.0 | 335                        | 19.8 | 1027                          | 67.4                                |
| 65 to 74                        |                                                        | 1,108                  | 33.6 | 414                        | 24.5 | 1522                          | 72.8                                |
| 75 to 84                        |                                                        | 835                    | 25.3 | 434                        | 25.6 | 1269                          | 65.8                                |
| 85+                             |                                                        | 198                    | 6.0  | 227                        | 13.4 | 425                           | 46.6                                |
| <b>IMD<br/>Category</b>         | <b><math>\chi^2=55.9,</math><br/><b>p&lt;0.001</b></b> |                        |      |                            |      |                               |                                     |
| 1 least<br>deprived             |                                                        | 826                    | 25.0 | 331                        | 19.6 | 1157                          | 71.4                                |
| 2                               |                                                        | 812                    | 24.6 | 357                        | 21.1 | 1169                          | 69.5                                |
| 3                               |                                                        | 703                    | 21.3 | 349                        | 20.7 | 1052                          | 66.8                                |
| 4                               |                                                        | 554                    | 16.8 | 352                        | 20.7 | 906                           | 61.1                                |
| 5 most<br>deprived              |                                                        | 399                    | 12.1 | 300                        | 17.7 | 699                           | 57.1                                |
| Missing                         |                                                        | 6                      | 0.2  | 3                          | 0.2  | 9                             | 66.7                                |
| <b>Time since<br/>Diagnosis</b> | <b><math>\chi^2=4.1,</math><br/><b>p=0.25</b></b>      |                        |      |                            |      |                               |                                     |
| 1 year                          |                                                        | 848                    | 25.7 | 400                        | 23.6 | 1248                          | 67.9                                |
| 2 years                         |                                                        | 834                    | 25.3 | 414                        | 24.5 | 1248                          | 66.8                                |
| 3 years                         |                                                        | 806                    | 24.4 | 442                        | 26.1 | 1248                          | 64.6                                |
| 5 years                         |                                                        | 812                    | 24.6 | 436                        | 25.8 | 1248                          | 65.1                                |

Table 1b. Demographic Data by Cancer Group

| Characteristic                         |                               | Breast<br>(n=854) |      | Colorectal<br>(n=802) |      | Non Hodgkin's<br>Lymphoma<br>(n=778) |      | Prostate<br>(n=866) |      | Total<br>(n=3300) |      |
|----------------------------------------|-------------------------------|-------------------|------|-----------------------|------|--------------------------------------|------|---------------------|------|-------------------|------|
|                                        |                               | n                 | %    | n                     | %    | n                                    | %    | n                   | %    | n                 | %    |
| Sex                                    | $\chi^2=1700$ ,<br>$p<0.001$  |                   |      |                       |      |                                      |      |                     |      |                   |      |
| Male                                   |                               | 10                | 1.2  | 435                   | 54.2 | 419                                  | 53.9 | 848                 | 97.9 | 1712              | 51.9 |
| Female                                 |                               | 829               | 97.0 | 348                   | 43.4 | 352                                  | 45.2 | 0                   | 0    | 1529              | 46.3 |
| Missing                                |                               | 15                | 1.8  | 19                    | 2.4  | 7                                    | 0.9  | 18                  | 2.1  | 59                | 1.8  |
| Age                                    | $\chi^2=401$ ,<br>$p<0.001$   |                   |      |                       |      |                                      |      |                     |      |                   |      |
| under 55                               |                               | 231               | 27.0 | 57                    | 7.1  | 157                                  | 20.2 | 157                 | 18.1 | 467               | 14.2 |
| 55 to 64                               |                               | 237               | 27.8 | 136                   | 17.0 | 173                                  | 22.2 | 173                 | 20.0 | 692               | 21.0 |
| 65 to 74                               |                               | 224               | 26.2 | 280                   | 34.9 | 238                                  | 30.6 | 238                 | 27.5 | 1,108             | 33.6 |
| 75 to 84                               |                               | 122               | 14.3 | 246                   | 30.7 | 175                                  | 22.5 | 175                 | 20.2 | 835               | 25.3 |
| 85+                                    |                               | 40                | 4.7  | 83                    | 10.3 | 35                                   | 4.5  | 35                  | 4.0  | 198               | 6.0  |
| Ethnicity                              | $\chi^2=74.6$ ,<br>$p<0.001$  |                   |      |                       |      |                                      |      |                     |      |                   |      |
| White                                  |                               | 768               | 89.9 | 740                   | 92.3 | 688                                  | 88.4 | 786                 | 90.8 | 2982              | 90.4 |
| Asian                                  |                               | 35                | 4.1  | 19                    | 2.3  | 30                                   | 3.9  | 15                  | 1.7  | 99                | 3.0  |
| Black                                  |                               | 14                | 1.6  | 11                    | 1.4  | 21                                   | 2.7  | 36                  | 4.2  | 82                | 2.5  |
| Mixed                                  |                               | 4                 | 0.5  | 5                     | 0.6  | 6                                    | 0.8  | 1                   | 0.1  | 16                | 0.5  |
| Other                                  |                               | 4                 | 0.5  | 0                     | 0    | 4                                    | 0.5  | 3                   | 0.3  | 11                | 0.3  |
| Missing                                |                               | 29                | 3.4  | 27                    | 3.4  | 29                                   | 3.7  | 25                  | 2.9  | 110               | 3.3  |
| IMD<br>Category                        | $\chi^2=4.3$ ,<br>$p=0.97$    |                   |      |                       |      |                                      |      |                     |      |                   |      |
| 1 least<br>deprived                    |                               | 211               | 24.7 | 198                   | 24.7 | 202                                  | 26.0 | 215                 | 24.8 | 826               | 25.0 |
| 2                                      |                               | 210               | 24.6 | 199                   | 24.8 | 183                                  | 23.5 | 220                 | 25.4 | 812               | 24.6 |
| 3                                      |                               | 184               | 21.5 | 159                   | 19.8 | 177                                  | 22.7 | 183                 | 21.1 | 703               | 21.3 |
| 4                                      |                               | 141               | 16.5 | 147                   | 18.3 | 125                                  | 16.1 | 141                 | 16.3 | 554               | 16.8 |
| 5 most<br>deprived                     |                               | 104               | 12.2 | 98                    | 12.2 | 91                                   | 11.7 | 106                 | 12.2 | 399               | 12.1 |
| Missing                                |                               | 4                 | 0.5  | 1                     | 0.1  | 0                                    | 0    | 1                   | 0.1  | 6                 | 0.2  |
| Time since<br>Diagnosis                | $\chi^2=5.5$ ,<br>$p=0.78$    |                   |      |                       |      |                                      |      |                     |      |                   |      |
| 1 year                                 |                               | 215               | 25.2 | 202                   | 25.2 | 197                                  | 25.3 | 234                 | 27.0 | 848               | 25.7 |
| 2 years                                |                               | 212               | 24.8 | 215                   | 26.8 | 187                                  | 24.0 | 220                 | 25.4 | 834               | 25.3 |
| 3 years                                |                               | 204               | 23.9 | 195                   | 24.3 | 207                                  | 26.6 | 200                 | 23.1 | 806               | 24.4 |
| 5 years                                |                               | 223               | 26.1 | 190                   | 23.7 | 187                                  | 24.0 | 212                 | 24.5 | 812               | 24.6 |
| Other Long<br>Term Health<br>Condition | $\chi^2=12.1$ ,<br>$p=0.06$   |                   |      |                       |      |                                      |      |                     |      |                   |      |
| Yes                                    |                               | 435               | 50.9 | 432                   | 53.9 | 435                                  | 55.9 | 501                 | 57.9 | 1803              | 54.6 |
| No                                     |                               | 353               | 41.3 | 309                   | 38.5 | 287                                  | 36.9 | 299                 | 34.5 | 1248              | 37.8 |
| Don't Know                             |                               | 30                | 6.9  | 23                    | 2.9  | 33                                   | 4.2  | 27                  | 3.1  | 113               | 3.4  |
| Missing                                |                               | 36                | 4.2  | 38                    | 4.7  | 23                                   | 3.0  | 39                  | 4.5  | 136               | 4.1  |
| Disease<br>Status                      | $\chi^2=390.0$ ,<br>$p<0.001$ |                   |      |                       |      |                                      |      |                     |      |                   |      |
| Remission                              |                               | 677               | 79.3 | 625                   | 77.9 | 526                                  | 67.6 | 399                 | 46.1 | 2227              | 67.5 |
| Rx but<br>present                      |                               | 26                | 3.0  | 32                    | 4.0  | 81                                   | 10.4 | 144                 | 16.6 | 283               | 8.6  |
| Not treated                            |                               | 4                 | 0.5  | 6                     | 0.7  | 43                                   | 5.5  | 78                  | 9.0  | 131               | 4.0  |

|                   |  |    |     |    |     |    |     |     |      |     |     |
|-------------------|--|----|-----|----|-----|----|-----|-----|------|-----|-----|
| <b>Recurrence</b> |  | 30 | 3.5 | 20 | 2.5 | 30 | 3.9 | 8   | 0.9  | 88  | 2.6 |
| <b>Not sure</b>   |  | 58 | 6.8 | 69 | 8.6 | 53 | 6.8 | 140 | 16.2 | 320 | 9.7 |
| <b>Missing</b>    |  | 59 | 6.9 | 50 | 6.2 | 45 | 5.8 | 97  | 11.2 | 251 | 7.6 |

For peer review only

Table 2. EQ5D outcome category by cancer sub-group

| EQ5D Categories                  | 'High' QoL<br>(Scores=1) |      | Medium QoL<br>(0.5≤Scores<1) |      | Low QoL<br>(Scores<0.5) |      | Missing |     |
|----------------------------------|--------------------------|------|------------------------------|------|-------------------------|------|---------|-----|
|                                  | n                        | %    | n                            | %    | n                       | %    | n       | %   |
| <b>Breast</b>                    | 208                      | 24.4 | 514                          | 60.2 | 76                      | 8.9  | 56      | 6.6 |
| <b>Colorectal</b>                | 255                      | 31.2 | 434                          | 54.1 | 87                      | 10.8 | 26      | 3.2 |
| <b>Non Hodgkins<br/>Lymphoma</b> | 247                      | 31.7 | 398                          | 51.2 | 102                     | 13.1 | 31      | 4.0 |
| <b>Prostate</b>                  | 347                      | 40.0 | 390                          | 45.0 | 81                      | 9.4  | 48      | 5.5 |
| <b>Total</b>                     | 1057                     | 32.0 | 1736                         | 52.6 | 346                     | 10.5 | 161     | 4.9 |

For peer review only

Table 3a. Ordered Logistic Regression Model EQ5D in Breast Cancer Patients [n=709, pseudoR<sup>2</sup>=0.16  
p<0.001]

| Characteristic                       | Odds Ratio* | 95% CI |       | P value |
|--------------------------------------|-------------|--------|-------|---------|
| <b>Age (years)</b>                   |             |        |       |         |
| <55 years                            | REF         |        |       |         |
| 55-64                                | 0.69        | 0.45   | 1.06  | 0.09    |
| 65-74                                | 0.36        | 0.22   | 0.58  | <0.001  |
| 75-84                                | 0.59        | 0.32   | 1.08  | 0.09    |
| 85+                                  | 1.61        | 0.57   | 4.52  | 0.36    |
| <b>Deprivation</b>                   |             |        |       |         |
| 1 least deprived                     | REF         |        |       |         |
| 2                                    | 1.03        | 0.66   | 1.62  | 0.88    |
| 3                                    | 1.10        | 0.68   | 1.77  | 0.71    |
| 4                                    | 0.93        | 0.55   | 1.56  | 0.78    |
| 5 most deprived                      | 3.00        | 1.64   | 5.50  | <0.001  |
| <b>Physical Activity†</b>            | 0.88        | 0.82   | 0.95  | <0.001  |
| <b>Number of other LTC (excl BP)</b> |             |        |       |         |
| 0                                    | REF         |        |       |         |
| 1                                    | 1.84        | 1.25   | 2.70  | 0.002   |
| 2+                                   | 7.30        | 4.45   | 11.93 | <0.001  |
| <b>Treatment*</b>                    |             |        |       |         |
| Radio+Chemo+Surgery+Hormone          | REF         |        |       |         |
| Radio +Chemo+Surgery                 | 0.67        | 0.38   | 1.20  | 0.18    |
| Radio+Surgery                        | 0.51        | 0.29   | 0.90  | 0.02    |
| Radio+Surgery+Hormone                | 0.56        | 0.33   | 0.96  | 0.04    |
| Surgery only                         | 1.00        | 0.55   | 1.84  | 0.99    |
| Other                                | 0.92        | 0.53   | 1.58  | 0.76    |
| <b>Ethnicity</b>                     |             |        |       |         |
| White                                | REF         |        |       |         |
| Mixed                                | 0.50        | 0.06   | 4.29  | 0.53    |
| Asian                                | 1.96        | 0.77   | 5.01  | 0.16    |
| Black                                | 0.29        | 0.08   | 0.98  | 0.05    |
| Other                                | 2.20        | 0.17   | 29.32 | 0.55    |
| <b>Disease Status</b>                |             |        |       |         |
| Remission                            | REF         |        |       |         |
| Rx but present                       | 1.49        | 0.56   | 3.93  | 0.43    |
| Not treated                          | .           | .      | .     | .       |
| Recurrence                           | 4.70        | 1.92   | 11.52 | 0.001   |
| Not sure                             | 2.51        | 1.27   | 4.96  | 0.008   |
| <b>Time since Diagnosis</b>          |             |        |       |         |
| 1 year                               | REF         |        |       |         |
| 2 years                              | 1.02        | 0.64   | 1.62  | 0.95    |
| 3 years                              | 0.88        | 0.55   | 1.41  | 0.60    |
| 5 years                              | 0.93        | 0.59   | 1.47  | 0.76    |

\*Odds of reporting 'medium' or 'low' QoL EQ5D scores compared to 'high' QoL scores where 'high', 'medium' and 'low' QoL was defined as scores=1,  $0.5 \leq \text{scores} < 1$  and  $\text{scores} < 0.5$  respectively.

†Amount of physical activity performed each week quantified according to the Chief Medical Officer of England's recommendations<sup>16</sup>



Table 3b. Ordered Logistic Regression Model EQ5D in Colorectal Patients [n=485, pseudoR2=0.18, p&lt;0.001]

| Characteristic                       | Odds Ratio | 95% CI |       | P value |
|--------------------------------------|------------|--------|-------|---------|
| <b>Age (years)</b>                   |            |        |       |         |
| <55 years                            | REF        |        |       |         |
| 55-64                                | 1.28       | 0.59   | 2.75  | 0.53    |
| 65-74                                | 1.16       | 0.57   | 2.35  | 0.69    |
| 75-84                                | 1.23       | 0.57   | 2.64  | 0.59    |
| 85+                                  | 2.45       | 0.93   | 6.41  | 0.07    |
| <b>Sex</b>                           |            |        |       |         |
| Male                                 | REF        |        |       |         |
| Female                               | 1.22       | 0.81   | 1.82  | 0.34    |
| <b>Deprivation</b>                   |            |        |       |         |
| 1 least deprived                     | REF        |        |       |         |
| 2                                    | 0.83       | 0.48   | 1.43  | 0.50    |
| 3                                    | 0.57       | 0.33   | 1.00  | 0.05    |
| 4                                    | 0.62       | 0.34   | 1.13  | 0.12    |
| 5 most deprived                      | 1.17       | 0.58   | 2.34  | 0.66    |
| <b>Physical Activity†</b>            | 0.83       | 0.76   | 0.90  | <0.001  |
| <b>Number of other LTC(excl BP)</b>  |            |        |       |         |
| 0                                    | REF        |        |       |         |
| 1                                    | 2.09       | 1.29   | 3.37  | <0.001  |
| 2+                                   | 4.83       | 2.85   | 8.21  | <0.001  |
| <b>Treatment*</b>                    |            |        |       |         |
| Surgery only                         | REF        |        |       |         |
| Radio+Chemo+Surgery                  | 1.15       | 0.60   | 2.21  | 0.67    |
| Chemo+Surgery                        | 1.35       | 0.85   | 2.17  | 0.21    |
| Other                                | 1.58       | 0.77   | 3.22  | 0.21    |
| <b>Ethnicity</b>                     |            |        |       |         |
| White                                | REF        |        |       |         |
| Mixed                                | 1.72       | 0.24   | 12.42 | 0.59    |
| Asian                                | 1.99       | 0.46   | 8.54  | 0.36    |
| Black                                | 1.14       | 0.26   | 4.92  | 0.86    |
| Other                                | 1.72       | 0.24   | 12.42 | 0.59    |
| <b>Disease Status</b>                |            |        |       |         |
| Remission                            | REF        |        |       |         |
| Rx but present                       | 7.03       | 2.44   | 20.21 | <0.001  |
| Not treated                          | 0.16       | 0.01   | 2.63  | 0.20    |
| Recurrence                           | 4.56       | 1.54   | 13.49 | 0.01    |
| Not sure                             | 2.67       | 1.23   | 5.79  | 0.01    |
| <b>Stoma</b>                         |            |        |       |         |
| No                                   | REF        |        |       |         |
| Yes                                  | 1.32       | 0.80   | 2.19  | 0.27    |
| <b>Difficulty Controlling Bowels</b> |            |        |       |         |
| No                                   | REF        |        |       |         |
| Yes                                  | 2.30       | 1.43   | 3.72  | <0.001  |
| <b>Leak Urine</b>                    |            |        |       |         |
| No                                   | REF        |        |       |         |
| Yes                                  | 1.41       | 0.87   | 2.30  | 0.16    |
| <b>Time since Diagnosis</b>          |            |        |       |         |
| 1 year                               | REF        |        |       |         |
| 2 years                              | 0.72       | 0.42   | 1.22  | 0.22    |
| 3 years                              | 1.03       | 0.59   | 1.81  | 0.92    |
| 5 years                              | 0.85       | 0.49   | 1.48  | 0.56    |

1  
2  
3 \*Odds of reporting 'medium' or 'low' QoL EQ5D scores compared to 'high' QoL scores where 'high', 'medium'  
4 and 'low' QoL was defined as scores=1,  $0.5 \leq \text{scores} < 1$  and  $\text{scores} < 0.5$  respectively.  
5

6 †Amount of physical activity performed each week quantified according to the Chief Medical Officer of  
7 England's recommendations<sup>16</sup>  
8  
9  
10  
11  
12  
13  
14  
15  
16  
17  
18  
19  
20  
21  
22  
23  
24  
25  
26  
27  
28  
29  
30  
31  
32  
33  
34  
35  
36  
37  
38  
39  
40  
41  
42  
43  
44  
45  
46  
47  
48  
49  
50  
51  
52  
53  
54  
55  
56  
57  
58  
59  
60

For peer review only

Table 3c. Ordered Logistic Regression Model EQ5D in NHL Patients [n=614, pseudoR2=0.15 p&lt;0.001]

| Characteristic                            | Odds Ratio | 95% CI |       | P value |
|-------------------------------------------|------------|--------|-------|---------|
| <b>Age (years)</b>                        |            |        |       |         |
| <55 years                                 | REF        |        |       |         |
| 55-64                                     | 0.89       | 0.55   | 1.45  | 0.65    |
| 65-74                                     | 1.23       | 0.75   | 1.99  | 0.41    |
| 75-84                                     | 1.60       | 0.94   | 2.73  | 0.08    |
| 85+                                       | 2.13       | 0.84   | 5.39  | 0.11    |
| <b>Sex</b>                                |            |        |       |         |
| Male                                      | REF        |        |       |         |
| Female                                    | 1.25       | 0.89   | 1.74  | 0.19    |
| <b>Deprivation</b>                        |            |        |       |         |
| 1 least deprived                          | REF        |        |       |         |
| 2                                         | 1.06       | 0.67   | 1.69  | 0.80    |
| 3                                         | 1.21       | 0.75   | 1.95  | 0.43    |
| 4                                         | 1.64       | 0.97   | 2.76  | 0.07    |
| 5 most deprived                           | 1.19       | 0.65   | 2.21  | 0.57    |
| Physical Activity†                        | 0.91       | 0.84   | 0.98  | 0.01    |
| <b>Number of other LTC (excluding BP)</b> |            |        |       |         |
| 0                                         | REF        |        |       |         |
| 1                                         | 2.16       | 1.44   | 3.24  | <0.001  |
| 2+                                        | 7.26       | 4.51   | 11.69 | <0.001  |
| <b>Treatment*</b>                         |            |        |       |         |
| Chemo only                                | REF        |        |       |         |
| Radio+Chemo                               | 0.81       | 0.47   | 1.41  | 0.46    |
| Chemo + Antibody                          | 0.93       | 0.55   | 1.59  | 0.80    |
| Radio+Chemo+Other                         | 1.55       | 0.87   | 2.77  | 0.14    |
| Other                                     | 0.96       | 0.63   | 1.46  | 0.86    |
| <b>Ethnicity</b>                          |            |        |       |         |
| White                                     | REF        |        |       |         |
| Mixed                                     | 2.78       | 0.28   | 27.7  | 0.38    |
| Asian                                     | 0.68       | 0.29   | 1.59  | 0.38    |
| Black                                     | 0.91       | 0.33   | 2.49  | 0.85    |
| Other                                     | 0.61       | 0.09   | 4.39  | 0.62    |
| <b>Disease Status</b>                     |            |        |       |         |
| Remission                                 | REF        |        |       |         |
| Rx but present                            | 2.57       | 1.52   | 4.33  | <0.001  |
| Not treated                               | 0.83       | 0.17   | 3.96  | 0.82    |
| Recurrence                                | 3.73       | 1.68   | 8.29  | 0.001   |
| Not sure                                  | 3.04       | 1.58   | 5.84  | 0.001   |
| <b>Time since Diagnosis</b>               |            |        |       |         |
| 1 year                                    | REF        |        |       |         |
| 2 years                                   | 0.62       | 0.38   | 0.99  | 0.05    |
| 3 years                                   | 0.60       | 0.38   | 0.96  | 0.03    |
| 5 years                                   | 0.57       | 0.36   | 0.90  | 0.02    |

\*Odds of reporting 'medium' or 'low' QoL EQ5D scores compared to 'high' QoL scores where 'high', 'medium' and 'low' QoL was defined as scores=1,  $0.5 \leq \text{scores} < 1$  and scores<0.5 respectively.

†Amount of physical activity performed each week quantified according to the Chief Medical Officer of England's recommendations<sup>16</sup>

Table 3d. Ordered Logistic Regression Model EQ5D in Prostate Patients [n=524, pseudoR2=0.22 p&lt;0.001]

| Characteristic                       | Odds Ratio | 95% CI |        | P value |
|--------------------------------------|------------|--------|--------|---------|
| <b>Age (years)</b>                   |            |        |        |         |
| <55 years                            | REF        |        |        |         |
| 55-64                                | 1.32       | 0.41   | 4.30   | 0.64    |
| 65-74                                | 1.72       | 0.55   | 5.38   | 0.36    |
| 75-84                                | 1.32       | 0.41   | 4.30   | 0.64    |
| 85+                                  | 1.92       | 0.42   | 8.78   | 0.40    |
| <b>Deprivation</b>                   |            |        |        |         |
| 1 least deprived                     | REF        |        |        |         |
| 2                                    | 1.09       | 0.64   | 1.85   | 0.74    |
| 3                                    | 1.19       | 0.68   | 2.08   | 0.55    |
| 4                                    | 1.61       | 0.88   | 2.95   | 0.13    |
| 5 most deprived                      | 2.57       | 1.31   | 5.04   | 0.01    |
| <b>Physical Activity†</b>            | 0.82       | 0.75   | 0.88   | <0.001  |
| <b>Number of other LTC(excl BP)</b>  |            |        |        |         |
| 0                                    | REF        |        |        |         |
| 1                                    | 1.55       | 0.94   | 2.54   | 0.09    |
| 2+                                   | 4.28       | 2.62   | 7.01   | <0.001  |
| <b>Treatment*</b>                    |            |        |        |         |
| Radio+Hormone                        | REF        |        |        |         |
| Surgery only                         | 0.39       | 0.21   | 0.71   | <0.001  |
| Hormone only                         | 1.68       | 0.85   | 3.33   | 0.14    |
| Radio only                           | 0.94       | 0.53   | 1.66   | 0.83    |
| Active surveillance only             | 1.16       | 0.47   | 2.88   | 0.75    |
| Other                                | .          | .      | .      | .       |
| <b>Ethnicity</b>                     |            |        |        |         |
| White                                | REF        |        |        |         |
| Mixed                                | 3.82       | 0.07   | 203.44 | 0.51    |
| Asian                                | 3.21       | 0.56   | 18.49  | 0.19    |
| Black                                | 2.54       | 0.96   | 6.73   | 0.06    |
| Other                                | 0.00       | 0.00   | .      | 0.98    |
| <b>Disease Status</b>                |            |        |        |         |
| Remission                            | REF        |        |        |         |
| Rx but present                       | 1.75       | 0.94   | 3.26   | 0.08    |
| Not treated                          | 1.06       | 0.37   | 3.05   | 0.91    |
| Recurrence                           | 1.71       | 0.17   | 16.91  | 0.65    |
| Not sure                             | 1.48       | 0.85   | 2.58   | 0.17    |
| <b>Urinary Leakage</b>               |            |        |        |         |
| No                                   | REF        |        |        |         |
| Yes                                  | 3.52       | 2.32   | 5.35   | <0.001  |
| <b>Erectile Dysfunction</b>          |            |        |        |         |
| No                                   | REF        |        |        |         |
| Yes                                  | 1.46       | 0.96   | 2.23   | 0.08    |
| <b>Difficulty Controlling Bowels</b> |            |        |        |         |
| No                                   | REF        |        |        |         |
| Yes                                  | 1.62       | 0.90   | 2.92   | 0.10    |
| <b>Time since Diagnosis</b>          |            |        |        |         |
| 1 year                               | REF        |        |        |         |
| 2 years                              | 0.83       | 0.50   | 1.40   | 0.49    |
| 3 years                              | 0.80       | 0.47   | 1.36   | 0.41    |
| 5 years                              | 0.77       | 0.45   | 1.33   | 0.36    |

1  
2  
3  
4  
5  
6  
7  
8  
9  
10  
11  
12  
13  
14  
15  
16  
17  
18  
19  
20  
21  
22  
23  
24  
25  
26  
27  
28  
29  
30  
31  
32  
33  
34  
35  
36  
37  
38  
39  
40  
41  
42  
43  
44  
45  
46  
47  
48  
49  
50  
51  
52  
53  
54  
55  
56  
57  
58  
59  
60

\*Odds of reporting 'medium' or 'low' QoL EQ5D scores compared to 'high' QoL scores where 'high', 'medium' and 'low' QoL was defined as scores=1,  $0.5 \leq \text{scores} < 1$  and  $\text{scores} < 0.5$  respectively.

†Amount of physical activity performed each week quantified according to the Chief Medical Officer of England's recommendations<sup>16</sup>

For peer review only

Table 4. Comparison of Quality of Life scores with other population data

|                                 | Health Survey for England (HSE 2008) <sup>34</sup> |                 | GP Population Survey (GPPS) <sup>35</sup> | GP Population Survey (GPPS) <sup>35</sup> | This survey |                          |
|---------------------------------|----------------------------------------------------|-----------------|-------------------------------------------|-------------------------------------------|-------------|--------------------------|
|                                 | All ages                                           | Ages ≥ 45 years | All                                       | No LTC                                    | All         | In remission with no LTC |
| Number of respondents           | 14116                                              | 7672            | 426933                                    | 193285                                    | 3300        | 848                      |
| Median age                      | 48                                                 | 63              | 48                                        | 39                                        | 69.3        | 63.2                     |
| 'High' QOL (Scores=1)           | 56.0%                                              | 45.4%           | 50.6%                                     | 73.8%                                     | 32.0%       | 51.4%                    |
| 'Medium' QOL (0.5 ≤ Scores < 1) | 37.7%                                              | 45.6%           | 41.6%                                     | 25.2%                                     | 52.6%       | 44.3%                    |
| 'Low' QOL (Scores < 0.5)        | 6.3%                                               | 9.0%            | 7.8%                                      | 0.9%                                      | 10.5%       | 2.1%                     |

Supplementary Table 1. Quality of Life Dimension Results (EQ5D) by Cancer Sub group

| EQ5D dimension                                                 |                                | Breast<br>(n=854) |      | Colorectal<br>(n=802) |      | Non<br>Hodgkin's<br>Lymphoma<br>(n=778) |      | Prostate<br>(n=866) |      | Total<br>(n=3300) |      |
|----------------------------------------------------------------|--------------------------------|-------------------|------|-----------------------|------|-----------------------------------------|------|---------------------|------|-------------------|------|
|                                                                |                                | n                 | %    | n                     | %    | n                                       | %    | n                   | %    | n                 | %    |
| <b>Mobility</b><br>$\chi^2=51.3$ ,<br>$p<0.001$                | No Problems                    | 567               | 66.4 | 442                   | 55.1 | 427                                     | 54.9 | 535                 | 61.8 | 1971              | 59.7 |
|                                                                | Slight Problems                | 105               | 12.3 | 159                   | 19.8 | 140                                     | 18.0 | 131                 | 15.1 | 535               | 16.2 |
|                                                                | Moderate Problems              | 107               | 12.5 | 120                   | 15.0 | 120                                     | 15.4 | 97                  | 11.2 | 444               | 13.5 |
|                                                                | Severe Problems                | 46                | 5.4  | 57                    | 7.1  | 71                                      | 9.1  | 69                  | 8.0  | 243               | 7.4  |
|                                                                | Cannot walk                    | 8                 | 0.9  | 13                    | 1.6  | 6                                       | 0.8  | 4                   | 0.4  | 31                | 0.9  |
|                                                                | Missing                        | 21                | 2.5  | 11                    | 1.4  | 14                                      | 1.8  | 30                  | 3.5  | 76                | 2.3  |
| <b>Self Care</b><br>$\chi^2=30.4$ ,<br>$p=0.002$               | No Problems                    | 716               | 83.8 | 651                   | 81.2 | 611                                     | 78.5 | 704                 | 81.3 | 2682              | 81.3 |
|                                                                | Slight Problems                | 47                | 5.5  | 67                    | 8.4  | 66                                      | 8.5  | 78                  | 9.0  | 258               | 7.8  |
|                                                                | Moderate Problems              | 45                | 5.3  | 46                    | 5.7  | 71                                      | 9.1  | 44                  | 5.1  | 206               | 6.2  |
|                                                                | Severe Problems                | 12                | 1.4  | 18                    | 2.2  | 12                                      | 1.5  | 9                   | 1.0  | 51                | 1.5  |
|                                                                | Cannot wash/dress              | 6                 | 0.7  | 9                     | 1.1  | 4                                       | 0.5  | 4                   | 0.5  | 23                | 0.7  |
|                                                                | Missing                        | 28                | 3.3  | 11                    | 1.4  | 14                                      | 1.8  | 27                  | 3.1  | 80                | 2.4  |
| <b>Usual<br/>Activities</b><br>$\chi^2=34.5$ ,<br>$p<0.001$    | No Problems                    | 513               | 60.1 | 429                   | 53.5 | 411                                     | 52.8 | 533                 | 61.5 | 1886              | 57.2 |
|                                                                | Slight Problems                | 162               | 19.0 | 173                   | 21.6 | 156                                     | 20.1 | 145                 | 16.7 | 636               | 19.3 |
|                                                                | Moderate Problems              | 111               | 13.0 | 113                   | 14.1 | 127                                     | 16.3 | 104                 | 12.1 | 455               | 13.7 |
|                                                                | Severe Problems                | 31                | 3.6  | 48                    | 6.0  | 49                                      | 6.3  | 43                  | 5.0  | 171               | 5.2  |
|                                                                | Cannot do usual activities     | 14                | 1.6  | 24                    | 3.0  | 26                                      | 3.3  | 15                  | 1.7  | 79                | 2.4  |
|                                                                | Missing                        | 23                | 2.7  | 15                    | 1.8  | 9                                       | 1.2  | 26                  | 3.0  | 73                | 2.2  |
| <b>Pain</b><br>$\chi^2=134.3$ ,<br>$p<0.001$                   | No Pain                        | 329               | 38.5 | 429                   | 53.5 | 408                                     | 52.4 | 526                 | 60.7 | 1692              | 51.3 |
|                                                                | Slight Pain                    | 341               | 39.9 | 220                   | 27.4 | 180                                     | 23.1 | 169                 | 19.5 | 910               | 27.6 |
|                                                                | Moderate Pain                  | 113               | 13.2 | 92                    | 11.5 | 120                                     | 15.4 | 101                 | 11.7 | 426               | 12.9 |
|                                                                | Severe Pain                    | 39                | 4.6  | 35                    | 4.4  | 51                                      | 6.6  | 38                  | 4.4  | 163               | 4.9  |
|                                                                | Extreme Pain                   | 5                 | 0.6  | 9                     | 1.1  | 10                                      | 1.3  | 3                   | 0.3  | 27                | 0.8  |
|                                                                | Missing                        | 27                | 3.2  | 17                    | 2.1  | 9                                       | 1.2  | 29                  | 3.3  | 82                | 2.5  |
| <b>Anxiety/<br/>depression</b><br>$\chi^2=37.1$ ,<br>$p<0.001$ | No anxiety/depression          | 475               | 55.6 | 504                   | 62.8 | 464                                     | 59.6 | 566                 | 65.4 | 2009              | 60.9 |
|                                                                | Slight anxiety/depression      | 241               | 28.2 | 196                   | 24.4 | 186                                     | 23.9 | 183                 | 21.1 | 806               | 24.4 |
|                                                                | Moderate<br>anxiety/depression | 78                | 9.1  | 78                    | 9.7  | 83                                      | 10.7 | 76                  | 8.8  | 315               | 9.5  |
|                                                                | Severe anxiety/depression      | 21                | 2.5  | 6                     | 0.8  | 21                                      | 2.7  | 8                   | 0.9  | 56                | 1.7  |
|                                                                | Extreme<br>anxiety/depression  | 10                | 1.2  | 4                     | 0.5  | 8                                       | 1.0  | 4                   | 0.5  | 26                | 0.8  |
|                                                                | Missing                        | 29                | 3.4  | 14                    | 1.8  | 16                                      | 2.1  | 29                  | 3.3  | 88                | 2.7  |

Supplementary Table 2 Quality of Life Dimension Results (EQ5D) by time since diagnosis of cancer

|                           |                             | 1 year<br>(n=848)         |      | 2 years<br>(n=834) |      | 3 years<br>(n=806) |      | 5 years<br>(n=812) |      | Total<br>(n=3300) |      |      |
|---------------------------|-----------------------------|---------------------------|------|--------------------|------|--------------------|------|--------------------|------|-------------------|------|------|
|                           |                             | N                         | %    | N                  | %    | N                  | %    | N                  | %    | N                 | %    |      |
| <b>Mobility</b>           | No Problems                 | 521                       | 61.4 | 501                | 60.1 | 486                | 60.3 | 463                | 57.0 | 1971              | 59.7 |      |
|                           | $\chi^2=21.1, p=0.05$       | Slight Problems           | 150  | 17.7               | 123  | 14.7               | 127  | 15.8               | 135  | 16.6              | 535  | 16.2 |
|                           | Moderate Problems           | 93                        | 11.0 | 116                | 13.9 | 104                | 12.9 | 131                | 13.1 | 444               | 13.5 |      |
|                           | Severe Problems             | 62                        | 7.3  | 62                 | 7.4  | 56                 | 6.9  | 63                 | 7.8  | 243               | 7.4  |      |
|                           | Cannot walk                 | 2                         | 0.2  | 8                  | 9.6  | 13                 | 1.6  | 8                  | 1.0  | 31                | 0.9  |      |
|                           | Missing                     | 20                        | 2.4  | 24                 | 2.9  | 20                 | 2.5  | 12                 | 1.5  | 76                | 2.3  |      |
| <b>Self Care</b>          | No Problems                 | 696                       | 82.1 | 674                | 80.8 | 659                | 81.8 | 653                | 80.4 | 2682              | 81.3 |      |
|                           | $\chi^2=10.2, p=0.59$       | Slight Problems           | 59   | 6.9                | 65   | 7.8                | 61   | 7.6                | 73   | 9.0               | 258  | 7.8  |
|                           | Moderate Problems           | 57                        | 6.7  | 56                 | 6.7  | 42                 | 5.2  | 51                 | 6.3  | 206               | 6.2  |      |
|                           | Severe Problems             | 12                        | 1.4  | 12                 | 1.4  | 14                 | 1.7  | 13                 | 1.6  | 51                | 1.5  |      |
|                           | Cannot wash/dress           | 3                         | 0.4  | 4                  | 0.5  | 10                 | 1.2  | 6                  | 0.7  | 23                | 0.7  |      |
|                           | Missing                     | 21                        | 2.5  | 23                 | 2.8  | 20                 | 2.5  | 16                 | 2.0  | 80                | 2.4  |      |
| <b>Usual Activities</b>   | No Problems                 | 465                       | 54.8 | 474                | 56.8 | 465                | 57.7 | 482                | 59.4 | 1886              | 57.2 |      |
|                           | $\chi^2=13.9, p=0.31$       | Slight Problems           | 181  | 21.3               | 157  | 18.8               | 161  | 20.0               | 137  | 16.9              | 636  | 19.3 |
|                           | Moderate Problems           | 131                       | 15.4 | 112                | 13.4 | 95                 | 11.8 | 117                | 14.4 | 455               | 13.7 |      |
|                           | Severe Problems             | 35                        | 4.1  | 45                 | 5.4  | 44                 | 5.5  | 47                 | 5.8  | 171               | 5.2  |      |
|                           | Cannot do usual activities  | 18                        | 2.1  | 19                 | 2.3  | 23                 | 2.8  | 19                 | 2.3  | 79                | 2.4  |      |
|                           | Missing                     | 18                        | 2.1  | 27                 | 3.2  | 18                 | 2.2  | 10                 | 1.2  | 73                | 2.2  |      |
| <b>Pain</b>               | No Pain                     | 421                       | 49.6 | 412                | 49.4 | 435                | 54.0 | 424                | 52.2 | 1692              | 51.3 |      |
|                           | $\chi^2=18.0, p=0.12$       | Slight Pain               | 262  | 30.9               | 237  | 28.4               | 198  | 24.6               | 213  | 26.2              | 910  | 27.6 |
|                           | Moderate Pain               | 101                       | 11.9 | 112                | 13.4 | 105                | 13.0 | 108                | 13.3 | 426               | 12.9 |      |
|                           | Severe Pain                 | 34                        | 4.0  | 44                 | 5.3  | 38                 | 4.7  | 47                 | 5.8  | 163               | 4.9  |      |
|                           | Extreme Pain                | 7                         | 0.8  | 6                  | 0.7  | 11                 | 1.4  | 3                  | 0.4  | 27                | 0.8  |      |
|                           | Missing                     | 23                        | 2.7  | 23                 | 2.8  | 19                 | 2.4  | 17                 | 2.1  | 82                | 2.5  |      |
| <b>Anxiety/depression</b> | No anxiety/depression       | 466                       | 55.0 | 505                | 60.6 | 499                | 61.9 | 539                | 66.4 | 2009              | 60.9 |      |
|                           | $\chi^2=25.8, p=0.01$       | Slight anxiety/depression | 244  | 28.8               | 195  | 23.4               | 196  | 24.3               | 171  | 21.1              | 806  | 24.4 |
|                           | Moderate anxiety/depression | 88                        | 10.4 | 86                 | 10.3 | 68                 | 8.4  | 73                 | 9.0  | 315               | 9.5  |      |
|                           | Severe anxiety/depression   | 20                        | 2.4  | 13                 | 1.5  | 13                 | 1.6  | 10                 | 1.2  | 56                | 1.7  |      |
|                           | Extreme anxiety/depression  | 6                         | 0.7  | 8                  | 1.0  | 6                  | 0.7  | 6                  | 0.7  | 26                | 0.8  |      |
|                           | Missing                     | 24                        | 2.8  | 27                 | 3.2  | 24                 | 3.0  | 13                 | 1.6  | 88                | 2.7  |      |



Supplementary Table 3. EQ5D outcome category by the number of Long Term Conditions (LTC) in patients in remission

| EQ5D Categories | High QoL (Scores=1) |             | Medium QoL (0.5≤Scores<1) |             | Low QoL (Scores<0.5) |            | Missing   |            | Total        |
|-----------------|---------------------|-------------|---------------------------|-------------|----------------------|------------|-----------|------------|--------------|
|                 | n                   | %           | n                         | %           | n                    | %          | n         | %          |              |
| No LTC          | 436                 | 51.4        | 376                       | 44.3        | 18                   | 2.1        | 18        | 2.1        | 848          |
| 1 LTC           | 250                 | 36.2        | 378                       | 54.7        | 40                   | 5.8        | 23        | 3.3        | 691          |
| ≥2 LTC          | 129                 | 18.8        | 419                       | 60.9        | 119                  | 17.3       | 21        | 3.1        | 688          |
| <b>Total</b>    | <b>815</b>          | <b>36.6</b> | <b>1,173</b>              | <b>52.7</b> | <b>177</b>           | <b>7.9</b> | <b>62</b> | <b>2.8</b> | <b>2,227</b> |

Supplementary Table 4. EQ5D outcome category by the number of Long Term Conditions (LTC) in patients not in remission

| EQ5D Categories | High QoL (Scores=1) |             | Medium QoL (0.5≤Scores<1) |             | Low QoL (Scores<0.5) |             | Missing   |            | Total      |
|-----------------|---------------------|-------------|---------------------------|-------------|----------------------|-------------|-----------|------------|------------|
|                 | n                   | %           | n                         | %           | n                    | %           | n         | %          |            |
| No LTC          | 79                  | 33.9        | 130                       | 55.8        | 15                   | 6.4         | 9         | 3.9        | 233        |
| 1 LTC           | 64                  | 23.1        | 175                       | 63.2        | 25                   | 9.0         | 13        | 4.7        | 277        |
| ≥2 LTC          | 37                  | 11.9        | 166                       | 53.2        | 94                   | 30.1        | 15        | 4.8        | 312        |
| <b>Total</b>    | <b>180</b>          | <b>21.9</b> | <b>471</b>                | <b>57.3</b> | <b>134</b>           | <b>16.3</b> | <b>37</b> | <b>4.5</b> | <b>822</b> |

Supplementary Table 5. Fear of Dying and Recurrence of Disease by Time since Diagnosis

| Fear of Dying             | Yes%         |             | No           |             | Missing    |            | Total        |
|---------------------------|--------------|-------------|--------------|-------------|------------|------------|--------------|
|                           | n            | %           | n            | %           | n          | %          |              |
| 1 year ago                | 256          | 30.2        | 542          | 63.9        | 50         | 5.9        | 848          |
| 2 years ago               | 233          | 27.9        | 543          | 65.1        | 58         | 7.0        | 834          |
| 3 years ago               | 214          | 26.6        | 531          | 65.9        | 61         | 7.6        | 806          |
| 5 years ago               | 180          | 22.2        | 583          | 71.8        | 49         | 6.0        | 812          |
| <b>Total</b>              | <b>883</b>   | <b>26.8</b> | <b>2,199</b> | <b>66.6</b> | <b>218</b> | <b>6.6</b> | <b>3,300</b> |
| <b>Fear of Recurrence</b> | <b>n</b>     | <b>%</b>    | <b>n</b>     | <b>%</b>    | <b>n</b>   | <b>%</b>   |              |
| 1 year ago                | 437          | 51.5        | 369          | 43.5        | 42         | 5.0        | 848          |
| 2 years ago               | 403          | 48.3        | 398          | 47.7        | 33         | 4.0        | 834          |
| 3 years ago               | 376          | 46.7        | 384          | 47.6        | 46         | 5.7        | 806          |
| 5 years ago               | 345          | 42.5        | 427          | 52.6        | 40         | 4.9        | 812          |
| <b>Total</b>              | <b>1,561</b> | <b>47.3</b> | <b>1,578</b> | <b>47.8</b> | <b>161</b> | <b>4.9</b> | <b>3,300</b> |

Supplementary Figure 1. Distribution of EQ5D summary scores by cancer sub-type

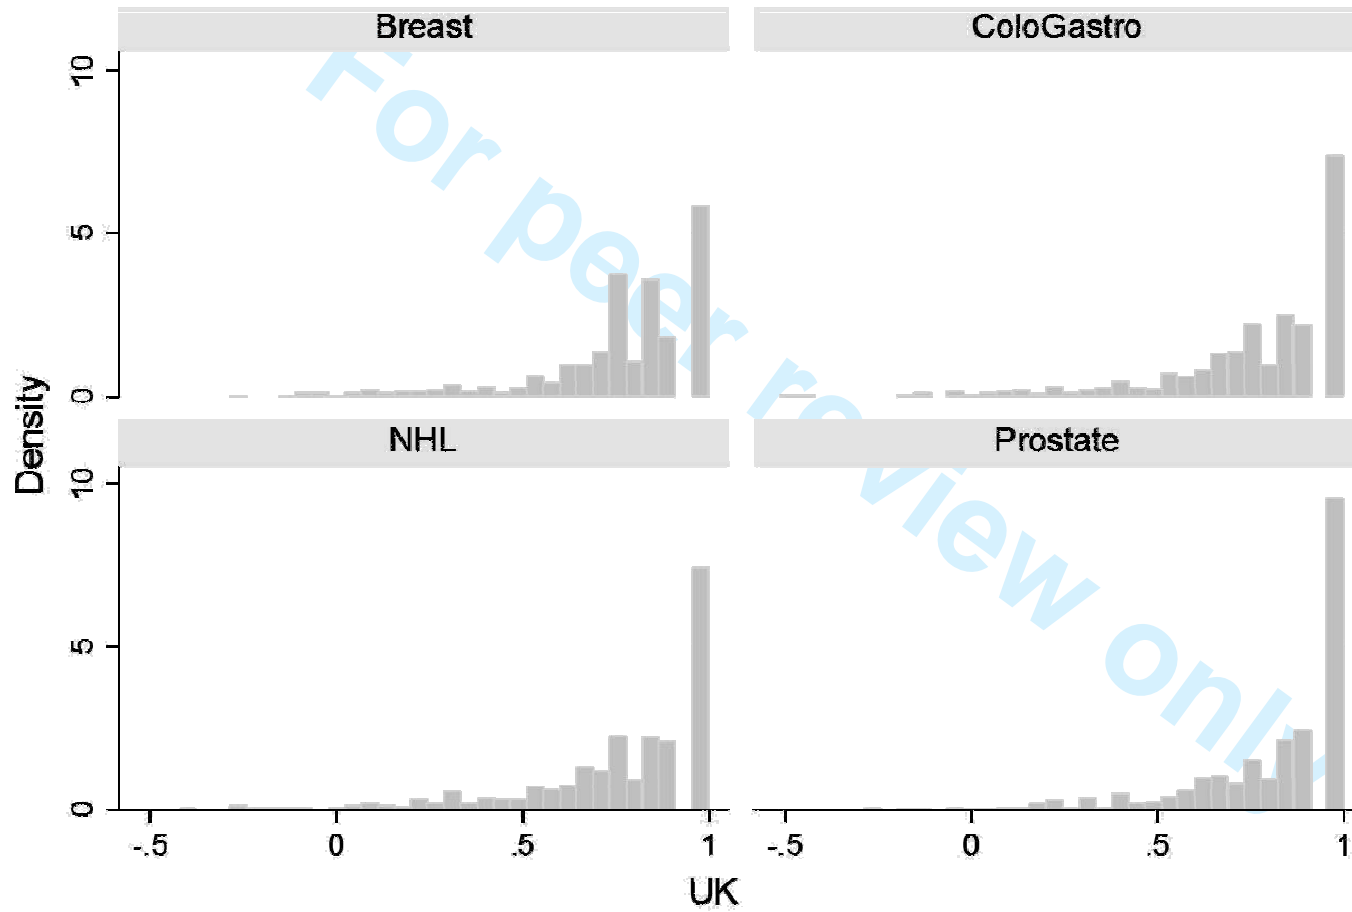

Graphs by tumour group

## References

1. Maddams J, Brewster D, Gavin A, Steward J, Elliott J, Utley M, et al. Cancer prevalence in the United Kingdom: estimates for 2008. *British Journal of Cancer* 2009;101(3):541-47.
2. Elliott J, Fallows A, Staetsky L, Smith PWF, Foster CL, Maher EJ, et al. The health and well-being of cancer survivors in the UK: findings from a population-based survey. *British Journal of Cancer* 2011;105:S11-S20.
3. Lipscomb J, Gotay CC, Snyder CE. Patient-reported outcomes in cancer: A review of recent research and policy initiatives. *CA-a Cancer Journal for Clinicians* 2007;57(5):278-300.
4. Richards M, Corner J, Maher J. The National Cancer Survivorship Initiative: new and emerging evidence on the ongoing needs of cancer survivors. *British Journal of Cancer* 2011;105:S1-S4.
5. Garcia SF, Cella D, Clauser SB, Flynn KE, Lad T, Lai J-S, et al. Standardizing patient-reported outcomes assessment in cancer clinical trials: A patient-reported outcomes measurement information system initiative. *Journal of Clinical Oncology* 2007;25(32):5106-12.
6. Bode RK, Hahn EA, DeVellis R, Cella D, Patient-Reported Outcomes M. Measuring Participation: The Patient-Reported Outcomes Measurement Information System Experience. *Archives of Physical Medicine and Rehabilitation* 2010;91(9):S60-S65.
7. van de Poll-Franse LV, Horevoorts N, van Eenbergen M, Denollet J, Roukema JA, Aaronson NK, et al. The Patient Reported Outcomes Following Initial treatment and Long term Evaluation of Survivorship registry: Scope, rationale and design of an infrastructure for the study of physical and psychosocial outcomes in cancer survivorship cohorts. *European Journal of Cancer* 2011;47(14):2188-94.
8. Den Oudsten BL, Traa MJ, Thong MSY, Martijn H, De Hingh IHJT, Bosscha K, et al. Higher prevalence of sexual dysfunction in colon and rectal cancer survivors compared with the normative population: A population-based study. *European Journal of Cancer* 2012; 48(17):3161-70.
9. Hoffman RM, Hunt WC, Gilliland FD, Stephenson RA, Potosky AL. Patient satisfaction with treatment decisions for clinically localized prostate carcinoma. Results from the prostate cancer outcomes study. *Cancer* 2003;97(7):1653-62.
10. Potosky AL, Davis WW, Hoffman RM, Stanford JL, Stephenson RA, Penson DF, et al. Five-year outcomes after prostatectomy or radiotherapy for prostate cancer: The prostate cancer outcomes study. *Journal of the National Cancer Institute* 2004;96(18):1358-67.
11. Ayanian JZ, Zaslavsky AM, Arora NK, Kahn KL, Malin JL, Ganz PA, et al. Patients' Experiences With Care for Lung Cancer and Colorectal Cancer: Findings From the Cancer Care Outcomes Research and Surveillance Consortium. *Journal of Clinical Oncology* 2010;28(27):4154-61.
12. Department of Health. National Cancer Patient Experience Survey Programme - 2010 National Survey Report, 2010.
13. Davies N, Gibbons E, Mackintosh A, Fitzpatrick R. A Structured Review of Patient Reported Outcomes Measures (PROMS) for Breast Cancer, Report to the Department of Health. In: Patient Reported Outcomes Measurement Group, editor. Oxford, 2009.

14. Morris C, Gibbons E, Fitzpatrick R. A Structured Review of Patient Reported Outcome Measures (PROMS) for Prostate Cancer, Report to the Department of Health. In: Patient-Reported Outcomes Measurement Group, editor. Oxford, 2009.
15. Hadi M, Gibbons E, Fitzpatrick R. A Structured Review of Patient Reported Outcome Measures (PROMS) for Colorectal Cancer, Report to the Department of Health. In: Group PROM, editor. Oxford, 2009.
16. Department of Health. Start Active, Stay Active: A report on physical activity from the four home countries' Chief Medical Officers London, 2011.
17. The EuroQol Group. EuroQol-a new facility for the measurement of health-related quality of life. *Health Policy* 1990;16(3):199-208.
18. Herdman M, Gudex C, Lloyd A, Janssen M, Kind P, Parkin D, et al. Development and preliminary testing of the new five-level version of EQ-5D (EQ-5D-5L). *Quality of Life Research* 2011;20:1727-36.
19. Wright EP, Kiely M, Johnston C, Smith AB, Cull A, Selby PJ. Development and evaluation of an instrument to assess social difficulties in routine oncology practice. *Quality of Life Research* 2005;14(2):373-86.
20. Wright P, Smith A, Brown S, Brown J, Roberts K. Measuring social difficulties: Clinical meaning and utility of the Social Difficulties Inventory (SDI). *Psycho-Oncology* 2006;15(2):S436-S37.
21. Wright P, Smith AB, Keding A, Velikova G. The Social Difficulties Inventory (SDI): development of subscales and scoring guidance for staff. *Psycho-Oncology* 2011;20(1):36-43.
22. Sheldon H, Sizmur S. An evaluation of the National Cancer Survivorship Initiative test community projects: Picker Institute Europe, 2010.
23. Girgis A, Lambert S, Lecathelinais C. The supportive care needs survey for partners and caregivers of cancer survivors: development and psychometric evaluation. *Psycho-Oncology* 2011;20(4):387-93.
24. Ashley L, Jones H, Thomas J, Forman D, Newsham A, Morris E, et al. Integrating cancer survivors' experiences into UK cancer registries: design and development of the ePOCS system (electronic Patient-reported Outcomes from Cancer Survivors). *British Journal of Cancer* 2011;105:S74-S81.
25. Webster K, Cella D, Yost K. The Functional Assessment of Chronic Illness Therapy (FACIT) Measurement System: properties, applications, and interpretation. *Health and Quality of Life Outcomes*. 2003;1:79.
26. Department for Communities and Local Government. English Indices of Multiple Deprivation 2010: Crown copyright, 2011.
27. van Hout B, Janssen MF, Feng Y-S, Kohlmann T, Busschbach J, Golicki D, Lloyd A, Scalone L, Kind P, Pickard AS. Interim Scoring for the EQ-5D-5L: Mapping the EQ-5D-5L to EQ-5D-3L Value Sets. *Value in Health* 2012;15:708-715..
28. Judd CM, McLelland GH, Ryan CS. *Data Analysis: A Model Comparison Approach*. Second ed: Routledge, 2008.
29. National Research Ethics Service. Differentiating audit, service evaluation and research version 1.1, 2006. Available via <http://www.nres.nhs.uk/EasysiteWeb/getresource.axd?AssetID=340&type=full&servicetype=Attachment>; last accessed 22 January 2013.
30. Ganz PA, Land SR, Antonio C, Zheng P, Yothers G, Petersen L, et al. Cancer survivorship research: the challenge of recruiting adult long term cancer survivors from a

- 1  
2  
3 cooperative clinical trials group. *Journal of Cancer Survivorship-Research and Practice*  
4 2009;3(3):137-47.
- 5 31. Moller H, Richards S, Hanchett N, Riaz SP, Luechtenborg M, Holmberg L, et al.  
6 Completeness of case ascertainment and survival time error in English cancer  
7 registries: impact on 1-year survival estimates. *British Journal of Cancer*  
8 2011;105(1):170-76.
- 9 32. King MT, Viney R, Smith DP, Hossain I, Street D, Savage E, et al. Survival gains needed to  
10 offset persistent adverse treatment effects in localised prostate cancer. *British*  
11 *Journal of Cancer* 2012;106(4):638-45.
- 12 33. Markland AD, Goode PS, Redden DT, Borrud LG, Burgio KL. Prevalence of Urinary  
13 Incontinence in Men: Results From the National Health and Nutrition Examination  
14 Survey. *Journal of Urology* 2010;184(3):1022-27.
- 15 34. Craig R, Mindell J, Hirani V, editors. Health Survey for England 2008. London: National  
16 Centre of Social Research; 2009. (Series HS no. 18)..
- 17 35. Department of Health. The GP Patient Survey, 2012. Available via [http://www.gp-](http://www.gp-patient.co.uk/results)  
18 [patient.co.uk/results](http://www.gp-patient.co.uk/results); last accessed 22 January 2013.
- 19 36. Eakin EG, Youlden DR, Baade PD, Lawler SP, Reeves MM, Heyworth JS, et al. Health  
20 status of long-term cancer survivors: Results from an Australian population-based  
21 sample. *Cancer Epidemiology Biomarkers & Prevention* 2006;15(10):1969-76.
- 22 37. Kenfield SA, Stampfer MJ, Giovannucci E, Chan JM. Physical Activity and Survival After  
23 Prostate Cancer Diagnosis in the Health Professionals Follow-Up Study. *Journal of*  
24 *Clinical Oncology* 2011;29(6):726-32.
- 25 38. Barbieri JM, Greenberg DC, Wright KA, Brown CH, Palmer C, Neal DE, et al. The  
26 association of diagnosis in the private or NHS sector on prostate cancer stage and  
27 treatment. *Journal of Public Health* 2012;34(1):108-14.
- 28 39. Department of Health. NHS Outcomes Framework 2012-13, 2011. Available via  
29 [https://www.wp.dh.gov.uk/publications/files/2012/11/121109-NHS-Outcomes-](https://www.wp.dh.gov.uk/publications/files/2012/11/121109-NHS-Outcomes-Framework-2013-14.pdf)  
30 [Framework-2013-14.pdf](https://www.wp.dh.gov.uk/publications/files/2012/11/121109-NHS-Outcomes-Framework-2013-14.pdf); last accessed 22 January 2013.
- 31  
32  
33  
34  
35  
36  
37  
38  
39  
40  
41  
42  
43  
44  
45  
46  
47  
48  
49  
50  
51  
52  
53  
54  
55  
56  
57  
58  
59  
60

**Title:****Patient Reported Outcomes of Cancer Survivors in England 1 to 5 years after Diagnosis: a cross-sectional survey.**

|                   |     |                                                                |
|-------------------|-----|----------------------------------------------------------------|
| Glaser Adam W     | DM  | Leeds Teaching Hospitals NHS Trust <sup>1</sup>                |
| Fraser Lorna K    | PhD | University of York <sup>2</sup>                                |
| Corner Jessica    | PhD | University of Southampton <sup>3</sup>                         |
| Feltbower Richard | PhD | University of Leeds <sup>4</sup>                               |
| Morris Eva JA     | PhD | University of Leeds <sup>5</sup>                               |
| Hartwell Greg     | MA  | Cancer Policy Team, Department of Health <sup>6</sup>          |
| Richards Mike     | MD  | Cancer Policy Team, Department of Health, England <sup>6</sup> |

1. Department of Paediatric Oncology, Martin Wing, Leeds General Infirmary, Great George Street, Leeds, LS1 3EX
2. Department of Health Sciences, Heslington, York, YO10 5DD
3. Faculty of Health Sciences, University of Southampton, Southampton, SO17 1BJ.
4. Division of Epidemiology, Level 8 Worsley Building, Leeds Institute of Genetics, Health & Therapeutics, University of Leeds, Leeds, UK
5. Section of Epidemiology & Biostatistics, Leeds Institute of Molecular Medicine, Level 6 Bexley Wing, St James's University Hospital, Leeds LS9 7TF
6. Cancer Policy Team, Department of Health, Wellington House, London, England.

**Corresponding Author:**

Adam Glaser

Address: Consultant Paediatric Oncologist, Department of Paediatric Oncology, D Floor, Martin Wing, Leeds General Infirmary, Great George Street, Leeds, LS1 3EX

Tel: 0113 3928779

Email: [adam.glaser@leedsth.nhs.uk](mailto:adam.glaser@leedsth.nhs.uk)

**Key Words:**

Cancer, Survivorship, Quality of Life, Patient Reported Outcomes, EQ5D, FACT

**Word Count:**

abstract: 3020 & main body of paper: 43913994

## Abstract

Objectives: To determine the feasibility of collecting population based patient reported outcome measures (PROMS) in assessing quality of life (QoL) to inform development of a national PROMS programme for cancer and to begin to describe outcomes in a UK cohort of survivors.

Design: Cross-sectional postal survey of cancer survivors using a population-based sampling approach.

Setting: English National Health Service.

Participants: 4,992 breast, colorectal, prostate and Non-Hodgkin's Lymphoma survivors one to five years from diagnosis.

Primary and Secondary Outcome Measures: Implementation issues, response rates, cancer-specific morbidities utilising items including the EQ5D, tumour-specific sub-scales of the Functional Assessment of Cancer Therapy and Social Difficulties Inventory.

Results:

3,300 (66%) survivors returned completed questionnaires. The majority aged 85+ years did not respond and there was an effect of deprivation on response rates. Response rates did not differ by gender, time since diagnosis or cancer type.

The presence of one or more long term conditions was associated with significantly lower QoL scores. Individuals from most deprived areas reported lower QoL scores and poorer outcomes on other measures, as did those self-reporting recurrent disease or uncertainty about disease status. QoL scores were stable at all time points for all cancers except NHL. QoL scores were lower than those from the general population in Health Survey for England (2008) and General Practice Patient Survey.

47% of patients reported fear of recurrence whilst 20% reported moderate or severe difficulties with mobility or usual activities. Bowel and urinary problems were common among colorectal and prostate patients. Poor bowel and bladder control were significantly associated with lower QoL.

1  
2  
3  
4  
5  
6  
7  
8  
9 Conclusions: This method of assessing QoL of cancer survivors is feasible and acceptable to  
10 most survivors. Routine collection of national population- based PROMS will enable  
11 identification of, and support for, the specific needs of survivors whilst allowing for  
12 comparison of outcome by service provider.

13  
14  
15  
16 **Objectives:** ~~To determine the feasibility and value of patient reported outcome measures~~  
17 ~~(PROMS) in assessing quality of life (QoL) to inform the development of a national PROMS~~  
18 ~~programme for cancer and to begin to describe PRO in a UK cohort of survivors.~~

19  
20  
21 **Design:** ~~Cross-sectional postal survey of cancer survivors using a population based sampling~~  
22 ~~approach.~~

23  
24 **Setting:** ~~English National Health Service.~~

25  
26 **Participants:** ~~4,992 breast, colorectal, prostate and Non-Hodgkin's Lymphoma survivors one~~  
27 ~~to five years from diagnosis.~~

28  
29 **Primary and Secondary Outcome Measures:** ~~Implementation issues, response rates and~~  
30 ~~cancer specific morbidities utilising items including the EQ5D QoL scale, tumour specific~~  
31 ~~sub-scales of the Functional Assessment of Cancer Therapy and Social Difficulties Inventory.~~

32  
33 **Results:**

34  
35 ~~3,300 (66%) survivors invited to participate returned completed questionnaires. The~~  
36 ~~majority aged 85+ years did not respond and there was an effect of deprivation on response~~  
37 ~~rates. Response rates did not differ by gender, time since diagnosis or cancer type.~~

38  
39 ~~The presence of one or more long term conditions was associated with significantly lower~~  
40 ~~QoL scores. Individuals from the most deprived areas reported lower QoL scores and poorer~~  
41 ~~outcomes on other measures, as did those self-reporting recurrent disease or uncertainty~~  
42 ~~about disease status. QoL scores were stable at all over time points for all cancers except~~  
43 ~~NHL. Overall QoL scores were lower than those from the general population in the Health~~  
44 ~~Survey for England (2008) and General Practice Patient Survey.~~

45  
46  
47 ~~47% of patients reported fear of recurrence whilst 20% reported moderate or severe~~  
48 ~~difficulties with mobility or usual activities. Bowel and urinary problems were common~~  
49 ~~among colorectal and prostate patients. Poor bowel and bladder control were significantly~~  
50 ~~associated with lower QoL scores.~~



1  
2  
3  
4  
5  
6  
7  
8  
9  
10  
11  
12  
13  
14  
15  
16  
17  
18  
19  
20  
21  
22  
23  
24  
25  
26  
27  
28  
29  
30  
31  
32  
33  
34  
35  
36  
37  
38  
39  
40  
41  
42  
43  
44  
45  
46  
47  
48  
49  
50  
51  
52  
53  
54  
55  
56  
57  
58  
59  
60

~~**Conclusions:** This method of assessing QoL of cancer survivors is feasible and acceptable to most survivors. Inclusion of PROMS as a routinely collected health dataset will enable identification of, and support for, the specific needs of survivors whilst allowing for comparison of outcome by service provider.~~

**Funding**

This survey was funded by the Department of Health, England.

For peer review only

## Article Summary

### Article Focus

To determine the feasibility of routinely collecting population-based patient reported outcomes (PROMS) of cancer survivors to gather information on quality of life and cancer related morbidities that can be used to inform the development of a national PROMS programme for cancer.

### Key messages

- Collection of [population-based](#) information on quality of life from cohorts of cancer patients who are 1 to 5 years post diagnosis through cancer registries is feasible.
- The best quality of life was reported by those in remission and with no other long term conditions.
- ~~This~~ information [obtained by widespread extension of this methodology](#) will enable health economies to compare outcome across provider organisations and facilitate provision of [enhanced](#) services to meet the needs of cancer survivors.

### Strengths and Limitations

- Findings relate to the largest European survey of survivors of multiple cancer types at clearly defined time points from diagnosis.
- The study design eliminates many of the criticisms which have hindered the collection of population-based cancer patient reported outcome data in the past.
- English cancer registries provide a reliable denominator population from which to identify eligible participants.
- The questionnaires for the four cancer groups were identified as having face and content validity by a panel of health and social care professionals prior to use.
- Presence of multiple cancer groups, time points and some missing data may have resulted in a lack of power for certain analyses.

1  
2  
3  
4  
5  
6  
7  
8  
9  
10  
11  
12  
13  
14  
15  
16  
17  
18  
19  
20  
21  
22  
23  
24  
25  
26  
27  
28  
29  
30  
31  
32  
33  
34  
35  
36  
37  
38  
39  
40  
41  
42  
43  
44  
45  
46  
47  
48  
49  
50  
51  
52  
53  
54  
55  
56  
57  
58  
59  
60

- Selection bias may have arisen through differences in-response rates according to cancer group, deprivation category and age.
- The study excluded those treated in the private sector.

For peer review only

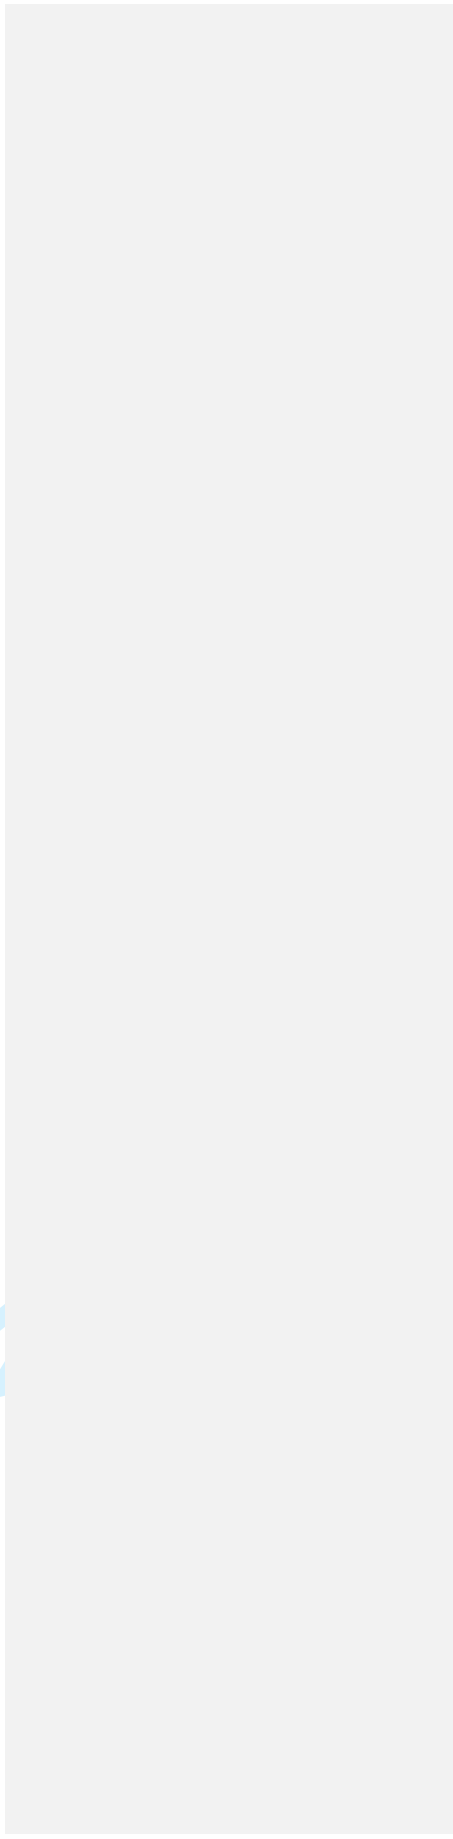

## Introduction

1.8 million people are living with and beyond a diagnosis of cancer in England and prevalence is predicted to increase by 3% per annum.<sup>1</sup> Cancer treatments are effectively reducing mortality and extending life, yet there is evidence that physical, psychological and social needs are not being addressed by the health and social care services, with individuals reporting significant unmet needs<sup>2</sup>. There is a lack of robust population-based information from which the prevalence, and impact, of disease and treatment associated morbidity burden can be ascertained and policy for appropriate interventions developed<sup>3</sup>. It has been equally difficult for health economies to compare the quality of health of those following treatment for cancer to those living with other long term conditions (LTC). These deficits have hampered the provision of comprehensive robust services for this growing population<sup>4</sup>.

In the United States a number of significant initiatives have been launched to systematically measure health outcomes in cancer survivors using patient reported outcome measures (PROMS) through the National Cancer Institute and American Cancer Society<sup>3 5-6</sup>. In Europe, at least one regional cancer register has started to collect PROMS via approaches made through the treating clinical teams<sup>7-8</sup>. The focus of PROMS work to date has been on refining treatment decision making for individuals and determining methodological approaches to implementation and analysis<sup>5-6 9-11</sup>. These efforts have yet to feed through into major national health system service improvement initiatives. The evaluation of patients' experiences of cancer care in England, through the National Cancer Patient Experience Survey, has resulted in care provider organisations and commissioners being able to identify areas of strengths and weakness in acute cancer care provision<sup>12</sup>.

Our objective was to determine the feasibility of routinely collecting population-based PROMS of cancer survivors ([via a postal survey of individuals identified from cancer registry information](#)), [without introduction from clinicians or researchers known to participants](#), to gather information on quality of life (QoL) and cancer related morbidities that can be used to inform the development of a national PROMS programme for cancer.

## Methods

### *Study design*

A cross-sectional postal survey was undertaken of individuals with a diagnosis of breast, colorectal, non-Hodgkin's lymphoma (NHL) or prostate cancer one, two, three and five years earlier. These four time-points were chosen to gain an understanding of whether PROMS varied over time. Patients attending private healthcare centres were excluded as the aims of the study focused on the assessment of PROMS within the National Health Service (NHS) in England.

### *Cohort Identification and Survey Process*

Three cancer registries (Thames Cancer Registry, Eastern Cancer Registry and Information Centre, West Midlands Cancer Intelligence Unit) were chosen as representative examples of the eight cancer registries in England. They provided information on all relevant cancer diagnoses<sup>12</sup> (Supplementary File 1) between 01/02/2010-30/04/2010, 01/02/2009-30/04/2009, 01/02/2008-30/04/2008, and 01/02/2006-30/04/2006. The individual study cohorts for each cancer at time points one, two, three and five years from date of recorded diagnosis were compiled through identification of the 312 cases diagnosed most closely to a specified time-point (First of February for each year). Cases were excluded if: under the age of 16 years, deceased, or not known to have a UK address.

Identified participants were sent a questionnaire by post by the survey provider, *Quality Health*. This was sent under cover of a standard introductory letter with the letter-head of the cancer centre most recently recorded by the cancer registry as having provided treatment. The survey covered patients attending 70 of 160 (43%) acute NHS Trusts delivering cancer care in England during 2011. Patients consented to taking part in the survey by returning questionnaires and declined by not returning them, or by returning blank questionnaires. ~~Two reminders were sent to non-responders. Checks for deceased patients were undertaken by the registries via the Demographic Batch Service at four separate time points in the survey process.~~ Two reminders were sent to non-responders. Checks for deceased patients were undertaken by the registries at four separate time

1  
2  
3  
4  
5  
6  
7 [points in the survey process to ensure attempts were not made to contact deceased](#)  
8 [individuals.](#)  
9

10  
11  
12  
13 Details of a dedicated freephone telephone helpline, staffed 24 hours each day, were  
14 provided [so the queries of any respondents could be resolved.](#)  
15

16  
17 *Questionnaire design and content* (Supplementary files 2, 3, 4 and 5)

18  
19 Questionnaires were developed for each cancer group. Content was identified through  
20 literature review, commissioned expert reviews<sup>13-15</sup>, consultation with patient groups,  
21 cancer charities and expert advisory groups. [In this way the views of multi-professional](#)  
22 [clinicians and service users were captured.](#)  
23  
24

25 Generic content included:

- 26 • Demographic and treatment-related questions adapted from the National Cancer  
27 Patient Experience Survey.<sup>12</sup>
- 28 • Self-reported response to treatment and disease status
- 29 • Amount of physical activity performed each week quantified according to the  
30 Chief Medical Officer of England's recommendations<sup>16</sup>.
- 31 • Presence or absence of long-term conditions (LTCs) other than cancer, using a list  
32 widely used in English Department of Health surveys.
- 33 • EQ5D: A 5 item generic health-related quality of life measure<sup>17-18</sup> chosen as it is a  
34 generic measure of health status widely used to evaluate population health in  
35 England<sup>17</sup>.
- 36 • Social Difficulties Inventory (SDI): A cancer survivor specific measure covering  
37 wider QoL domains<sup>19-20,21</sup> including information on the social consequences of  
38 cancer.
- 39 • Experience of care. [Relevant items to these phases of the cancer pathway were](#)  
40 [taken from the National Cancer Patient Experience Survey Questionnaire.](#)<sup>22</sup>
- 41 • [Fear of recurrence and dying. These items were generated by the project team](#)  
42 [and cognitively tested on representative sample groups prior to this pilot survey.](#)

43  
44  
45  
46  
47  
48  
49  
50  
51  
52  
53  
54  
55  
56  
57  
58  
59  
60

Formatted: Bullets and Numbering

- 1  
2  
3  
4  
5  
6  
7 • Individual components on psychological issues and work status identified  
8 through the literature as being important to cancer survivors but not covered by  
9 other components of the survey<sup>23, 24</sup>.

10  
11 Tumour-specific content included

- 12  
13 • Functional Assessment of Cancer Therapy (FACT) tumour specific  
14 components (FACT-B, FACT-C , FACT-Lym and FACT-P for breast, colorectal,  
15 NHL and prostate cancer respectively)<sup>25</sup>.

16  
17  
18  
19 *A detailed description of the qualitative comments provided by respondents are reported in a*  
20 *parallel submission to the [BMJ Open](#).*

21  
22  
23  
24 Cognitive testing was performed on the four site-specific versions of the questionnaire prior  
25 to their general use. This was done by sending questionnaires to volunteers (identified  
26 through cancer charities and the survey provider) prior to participating in a telephone  
27 interview. This style of testing was used to determine the population's ability to complete  
28 the questionnaire independently and to follow routing and other instructions in the  
29 questionnaire without prompting or help. Appropriate alterations were then made to the  
30 questionnaire. The two required changes were omission of a similar item from the FACT-B  
31 and FACT-P questionnaires "I am able to feel like a woman" and "I am able to feel like a  
32 man".

#### 33 34 35 36 37 38 39 *Data Handling/Analysis*

40 Age (at time of survey) was categorised as <55, 55-64, 65-74, 75-84, and ≥85 years. Self-  
41 reported ethnicity was grouped into white, asian, mixed, black and other. Deprivation  
42 category was based on the complete index of multiple deprivation (IMD)<sup>26</sup>. This was derived  
43 from the lower super output area (small census area) associated with their place of  
44 residence at the time of completing the survey, and used because the survey did not include  
45 questions related to income or educational level.

46  
47  
48  
49  
50  
51 Participants were asked if they had any LTC other than their cancer diagnosis and were  
52 asked to tick the appropriate LTCs. This variable was categorised into 'no other', 'one other'  
53 and 'two or more LTCs'.  
54

1  
2  
3  
4  
5  
6  
7  
8 A crosswalk algorithm was used to convert the 5L EQ5D to the 3L version, allowing a  
9 weighted health score to be assigned for each individual.<sup>27</sup> United Kingdom population data  
10 were used to calculate weighted scores (range -0.5 to 1 [perfect health]). Due to skewness,  
11 this outcome variable was categorised and ordered logistic regression undertaken. Three  
12 categories representing 'high', 'medium' and 'low' QoL scores were defined for ease of  
13 interpretation; these comprised scores equal to 1, less than 1 but greater than or equal to  
14 0.5 and less than 0.5. Odds ratios should be interpreted either as the odds of being in group  
15 2 (medium QoL scores) or group 3 (low QoL scores) compared to group 1 (high QoL scores)  
16 or the odds of being in group 3 (low QoL scores ) compared to group 1 or group 2.  
17  
18  
19  
20  
21

22  
23 ~~Cancer specific questions from FACT<sup>25</sup> were used as explanatory variables in this analysis~~  
24 ~~(FACT total score could not be calculated as only the cancer specific subscale questions~~  
25 ~~were included). Patient reported treatments were used in the analyses and treatment~~  
26 ~~combinations were categorised for each cancer site with the most common used as the~~  
27 ~~reference group.~~  
28  
29

30  
31 Cancer-specific questions from FACT<sup>25</sup> were used as explanatory variables in this analysis  
32 (FACT total score could not be calculated as only the cancer-specific subscale questions  
33 were included). Patient reported treatments were used in the analyses and treatment  
34 combinations were categorised for each cancer site with the most common used as the  
35 reference group. Given the study design, participants who had survived a year or more and  
36 who reported still receiving treatments when they completed the survey were likely to be  
37 receiving treatment for advanced or recurrent disease.  
38  
39  
40  
41  
42

#### 43 *Statistical methods*

44  
45 Chi-squared tests were used to compare categorical variables. Descriptive statistics were  
46 compared across cancer sites but the statistical models were stratified by cancer site.  
47 Variables were entered into the logistic regression model based on their *a priori* clinical and  
48 public health importance after agreement by the study investigators. Formal variable  
49 selection procedures were not invoked primarily due to statistical problems associated with  
50 these data-driven procedures<sup>28</sup> and, secondly, so that findings could be compared  
51 consistently across cancer sites and time points. Statistical significance was set at 1% to  
52  
53  
54  
55



1  
2  
3  
4  
5  
6  
7 minimise the chances of false-positive associations. All analyses were undertaken using  
8 STATA v12.1.  
9

10  
11 *Ethics and governance*

12 Approval was given to approach patients without informed consent by the National  
13 Information Governance Board (Supplementary File 6) as the study was performed as  
14 service evaluation<sup>29</sup>.  
15  
16  
17  
18  
19  
20  
21  
22  
23  
24  
25  
26  
27  
28  
29  
30  
31  
32  
33  
34  
35  
36  
37  
38  
39  
40  
41  
42  
43  
44  
45  
46  
47  
48  
49  
50  
51  
52  
53  
54  
55

## Results

### *Participants*

Questionnaires were sent to 4992 individuals, 126 (2.5%) of these had moved or died prior to receiving the questionnaire resulting in a final sample size of 4866. 3300 completed questionnaires were received (66% of the study sample). Of the surveys received by participants, the response rate was 68% (3300/4866).

### *Response rates*

Response rate varied significantly between cancer groups (Table 1a): 69.4% in the prostate group compared to 62.3% in the NHL group ( $p < 0.001$ ).

There was significant difference in the age structure of the non-responders vs. responders with a higher proportion of non-responders in the  $\geq 85$  years age group ( $p < 0.001$ ).

Response rates differed according to deprivation status (Table 1a) with a response rate of 71.4% in the least deprived category compared to 57.1% in the most deprived category ( $p < 0.001$ ).

No difference in response rates by time since diagnosis, sex or cancer type was found.

### *Demographics of respondents (Table 1b)*

Overall there were more males than females. Median age was 69 years (range 36-102).

There was significant variation in the distribution of ethnicity by cancer group with higher proportions of non-white ethnic groups with NHL. There was no significant difference by deprivation between cancer groups. Overall more than half of patients reported having a LTC. ~~Breast cancer responders displayed a similar age profile to the overall UK incident population.~~ There were fewer reported LTCs in the breast cohort than in other groups but this did not reach statistical significance.

### Missing data

Missing data levels were extremely low, typically less than 5% for most fields. SDI had slightly higher levels of missing data with completeness ranging from 80-85%. For the regression modelling (Tables 3a-3d) which used complete case analysis approach, completeness levels were lower and ranged from 60% (colorectal, prostate) to 83% (breast). There was no evidence that the prevalence of missing data was related to the order of the questions after examining levels of completeness for questions at the beginning compared to the end of the form.

### Helpline calls and other contact from survey participants

64 calls were made to the helpline, whilst further information about patient status was received via letters from patients (11) and NHS Trusts (2). The total number of enquiries was 77, representing 0.02% of the study cohort.

### Generic PROMS

Responses for the five EQ5D questions demonstrated that a higher percentage of NHL patients reported problems with self-care, mobility and usual activities. Two-thirds of breast cancer patients reported some degree of pain (Supplementary Table 1).

When detailed responses for the five EQ5D questions were summarised by time since diagnosis, there were no significant differences for pain, mobility, usual activities or self-care but the percentage reporting anxiety or depression symptoms decreased significantly ( $p=0.01$ ) (Supplementary Table 2).

Skewed weighted health scores were obtained from the EQ5D by cancer group (Supplementary Figure 1). The prostate group had significantly higher median (0.88) scores than the other three groups (0.84) ( $p=0.001$ ). The proportion of the populations reporting high QoL scores ranged from 24.4% for breast to 40.0% for prostate cancer (Table 2). Conversely, the proportion reporting low QoL scores ranged from 8.9% for breast to 13.1% for NHL. For all tumour groups, irrespective of remission status, the percentage of

1  
2  
3  
4  
5  
6  
7 individuals reporting lower QoL scores increased as the number of other LTCs increased  
8 (Supplementary Tables 3-4).  
9

#### 10 11 *Result by Tumour Type*

12 Multivariable ordered logistic regression (Tables 3a-3d) identified three factors which were  
13 consistently associated with lower QoL scores irrespective of tumour type: presence of LTCs,  
14 undertaking little physical activity and self-reported disease status.  
15  
16

#### 17 18 19 *Breast Cancer (Table 3a)*

20 Increasing number of LTCs, having recurrence of disease or being uncertain of disease status  
21 were associated with poorer outcomes across all three measures: The presence of one (OR  
22 1.84, 95%CI 1.25,2.70) or two or more (Odds Ratio (OR) 7.30, 95%Confidence Interval (CI)  
23 4.45,11.93) LTCs was significantly associated with lower QoL scores. Individuals self-  
24 reporting recurrent disease (OR 4.70, 95%CI 1.92,11.52) or those uncertain about their  
25 disease status (OR 2.51, 95%CI 1.27,4.96) were significantly more likely to report lower QoL  
26 scores compared to those self-reporting remission.  
27  
28  
29  
30  
31

32  
33 Increasing age -(apart from those aged 85 years or older) and more days undertaking  
34 physical activity were significantly associated with better outcomes in EQ5D, SDI and FACT-B  
35 measures: Those aged 65-74 reported significantly higher QoL scores compared to under  
36 55s (OR 0.36, 95%CI 0.22,0.58). Increasing physical activity was associated with higher QoL  
37 scores with each additional reported day per week of physical activity reducing the odds of a  
38 lower score by 12% (OR 0.88, 95%CI 0.82,0.95).  
39  
40  
41  
42

43 Individuals from the most deprived areas were significantly more likely to report lower  
44 EQ5D derived QoL scores than those from the most affluent areas (OR 3.00, 95%CI 1.64-  
45 5.50). Poorer outcomes in FACT-B items were associated with being in the most deprived  
46 category.  
47  
48  
49

#### 50 51 *Colorectal Cancer (Table 3b)*

52 The presence of one (OR 2.09, 95%CI 1.29,3.37) or two or more (OR 4.83, 95%CI 2.85,8.21)  
53 LTCs was significantly associated with lower QoL scores. Those who completed the  
54  
55

1  
2  
3  
4  
5  
6  
7 questionnaire whilst undergoing treatment (OR 7.03, 95%CI 2.44,20.21), experiencing  
8 recurrent disease (OR 4.56, 95%CI 1.54,13.49) or who were uncertain about their disease  
9 status (OR 2.67, 95%CI 1.23,5.79) had significantly increased odds of reporting lower QoL  
10 scores compared to those reporting remission.  
11

12  
13  
14 Increasing physical activity was significantly associated with a 17% decrease in the odds of a  
15 lower QoL score with each additional day per week of physical activity (OR 0.83, 95%CI  
16 0.76,0.90).  
17  
18

19  
20 23.5% reported urinary leakage, 19.0% difficulty controlling their bowels and 19.2% had a  
21 stoma. Individuals experiencing any difficulty controlling their bowels were more than twice  
22 as likely to report lower QoL scores (OR 2.30, 95%CI 1.43,3.72). The presence of a stoma or  
23 urinary leakage was not significantly associated with QoL.  
24  
25

26  
27  
28 Greater difficulties with holidays and travel were reported by those with colorectal cancer  
29 compared to other cancers. For example, only 51% of colorectal respondents reporting no  
30 difficulty compared to 64% with breast or prostate cancer.  
31  
32

### 33 34 *Non-Hodgkin's Lymphoma (Table 3c)*

35  
36 The presence of one (OR 2.16, 95%CI 1.44,3.24) or two or more (OR 7.26, 95%CI 4.51,11.69)  
37 LTCs was significantly associated with lower QoL scores. Those currently being treated (OR  
38 2.57, 95%CI 1.52,4.33), experiencing a recurrence (OR 3.73, 95%CI 1.68,8.29) or who were  
39 not sure about their disease status (OR 3.04, 95%CI 1.58,5.84) had increased odds of  
40 reporting lower QoL scores compared to those in remission. These same factors were  
41 associated with poorer outcomes on the SDI and FACT-Lym items.  
42  
43  
44

45  
46 A significant positive association between increasing physical activity and QoL was seen with  
47 each additional day of physical activity reducing the odds of lower QoL score by 9% (OR  
48 0.91, 95%CI 0.84,0.98). QoL seemed to improve with time from diagnosis for NHL but the  
49 trend was not significant (p=0.100).  
50  
51  
52

1  
2  
3  
4  
5  
6  
7  
8 *Prostate Cancer (Table 3d)*

9 The presence of two or more LTCs (OR 4.28, 95%CI 2.62,7.01) or being in the most deprived  
10 category (OR 2.57, 95%CI 1.31,5.04) were significantly associated with lower QoL scores, as  
11 well as increased social distress and difficulties identified by FACT-P.  
12  
13

14  
15 Patients who had surgery only (compared to radiotherapy and hormone treatment) had  
16 significantly higher QoL scores (OR 0.39, 95%CI 0.21,0.71) as did those reporting more days  
17 of physical activity (OR 0.82, 95%CI 0.75,0.88).  
18  
19

20  
21 38.5% of prostate patients reported some degree of urinary leakage, 12.9% reported  
22 difficulty controlling their bowels and 58.4% reported being unable to have an erection with  
23 a further 11% reporting significant difficulty in having or maintaining an erection. The  
24 presence of urinary leakage was significantly associated with lower QoL scores (OR 3.52,  
25 5%CI 2.32,5.35). Erectile dysfunction and difficulty controlling bowels were not significantly  
26 associated with QoL scores.  
27  
28  
29  
30

31  
32 Prostate survivors had significantly lower overall social distress scores on the SDI as well as  
33 fewer problems in all three sub-scales (everyday living, money matters, self and others)  
34 compared to other cancer types.  
35  
36  
37  
38

39 *Fear of recurrence and dying*

40 Almost half (47.3%) of patients reported fear of recurrence and over a quarter (26.8%)  
41 reported fear of dying (Supplementary Table 5). Both of these fears decreased significantly  
42 with time since diagnosis.  
43  
44  
45  
46  
47

48 *Physical activity*

49 Around one-fifth (21.4%) of participants reported taking 30 minutes or more of physical  
50 activity at least five days a week (in line with the Chief Medical Officer's recommendations).  
51 This varied by cancer: 16.5% for NHL, 19.0% for breast, 20.2% for colorectal and 29.0% for  
52 prostate. Overall 29.8% of patients reported doing no physical activity; this varied by cancer  
53  
54  
55

1  
2  
3  
4  
5  
6  
7  
8  
9  
10  
11  
12  
13  
14  
15  
16  
17  
18  
19  
20  
21  
22  
23  
24  
25  
26  
27  
28  
29  
30  
31  
32  
33  
34  
35  
36  
37  
38  
39  
40  
41  
42  
43  
44  
45  
46  
47  
48  
49  
50  
51  
52  
53  
54  
55  
56  
57  
58  
59  
60

group with 33.5% of NHL, 31.5% of colorectal and 27.4% of both breast and prostate survivors doing no physical activity.

For peer review only

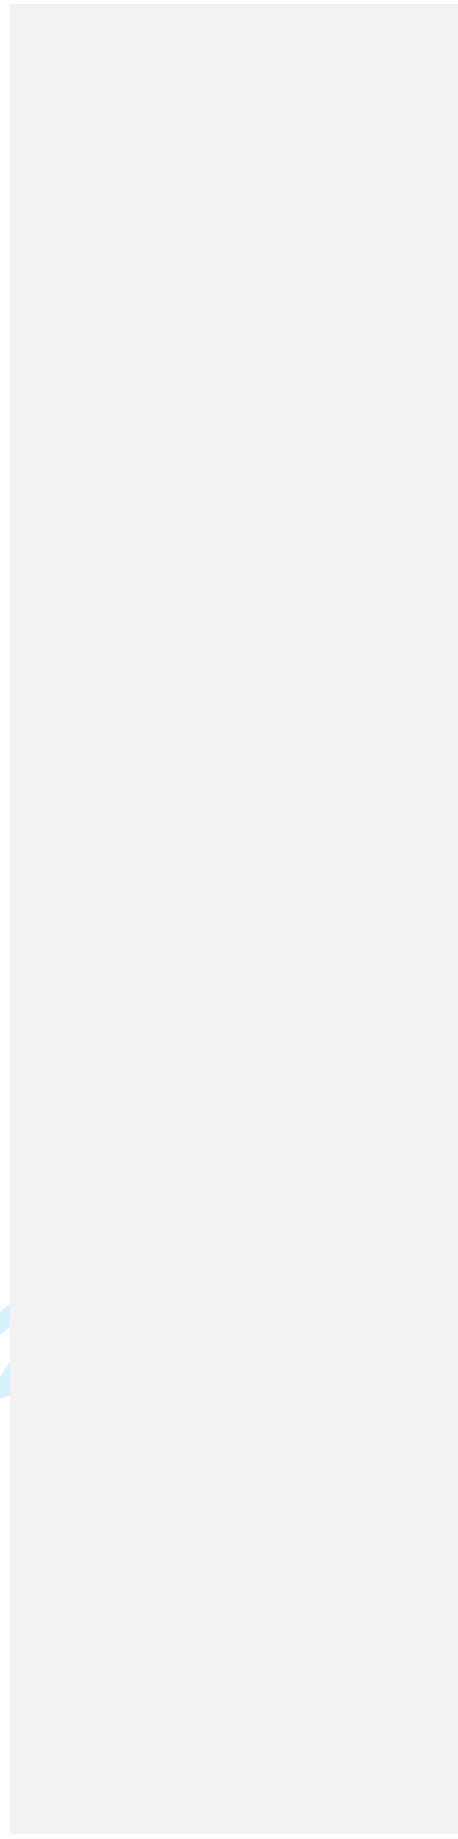

## Discussion

This study represents the largest European survey of survivors of multiple cancer types at clearly defined time points from diagnosis and demonstrates the feasibility of this straightforward method of collecting informative self-reported PROMS data on population-based cohorts of individuals living with and beyond a diagnosis of cancer in England. The process eliminates many of the potential biases that have hindered the collection of population-based cancer PROMS data in the past originating from the use of clinical trial data or acute service provider units for recruitment<sup>30</sup>. English cancer registries, which capture approximately 98-99% of all cancers diagnosed in England<sup>31</sup>, provide a reliable denominator population from which to identify eligible participants.

### *Acceptability and Validity*

The relatively high response rate, low level of missing data and low number of calls to the dedicated 24 hour helpline suggest that the methodology is acceptable to the majority of participants. However, the finding of lower participation amongst the elderly or those residing in areas with the greatest socio-economic deprivation would suggest that individuals from these vulnerable groups may need to be assessed by alternative methods. Whilst the questionnaires were identified as having face and content validity by a panel of health and social care professionals prior to use this study does not permit us to comment on the responsiveness or reliability of the instruments. However, the core components of the questionnaires had been identified by independent review as being reliable and appropriate for use in this setting<sup>13-15</sup>.

### *Key results*

The QoL of survivors for all four cancers was significantly related to self-reported disease status (remission versus relapse/uncertain), age and presence of LTCs. QoL appeared to either remain constant or improve slightly as time from diagnosis increased. This suggests that some problems experienced by cancer patients persist for long periods.



1  
2  
3  
4  
5  
6  
7 We have quantified the community prevalence of previously known late morbidities and  
8 assessed their impact on QoL. Problems relating to urinary and bowel control have been  
9 shown to be common, with nearly 40% of prostate survivors reporting urinary leakage and  
10 13% difficulty controlling their bowels. Similarly, amongst colorectal survivors nearly a  
11 quarter reported urinary leakage and 19% reported difficulty controlling their bowels.  
12 These rates are comparable to other studies of cancer patients<sup>32</sup> but exceed those seen in  
13 non-cancer populations where the prevalence of urinary incontinence in adult men was  
14 4.5% overall, rising to 16.0% for over 75 year olds<sup>33</sup>. In this study, the presence of “urinary  
15 leakage” in prostate survivors and “of difficulty controlling their bowels” in colorectal  
16 survivors were significantly associated with lower QoL scores making such symptoms  
17 important to address. Erectile dysfunction in prostate survivors, though common, did not  
18 significantly impact on QoL. The finding that QoL or physical problems such as difficulty  
19 controlling bowels or incontinence do not appear to be less prevalent five years following  
20 treatment may suggest individuals are not receiving adequate help or treatment for these  
21 conditions. Greater efforts should be made in prevention and early intervention for  
22 problems resulting from cancer treatment, and directed at those most at risk of the long-  
23 term problems identified from this study.  
24  
25  
26  
27  
28  
29  
30  
31  
32

#### 33 34 *Comparison with the General Population Data*

35 Most survivors in this study who were in remission and did not report a LTC were found to  
36 have a high QoL score. However, even the subgroup in remission with no LTC reported  
37 lower QoL scores than the data available from general population studies (Table 4). Some of  
38 this difference may be accounted for by age, as the Health Survey for England (2008)<sup>34</sup> and  
39 the General Practice Patient Survey (GPPS)<sup>35</sup> cohorts were substantially younger than the  
40 reported cancer study cohort. This assumption is supported from the HSE cohort aged over  
41 45 years (median age 63, n=7672) which reported a reduction in QoL scores (good 45%,  
42 moderate 46%, poor 9%).  
43  
44  
45  
46  
47  
48

#### 49 *Long-term Conditions*

50  
51  
52 The presence of one or more LTCs, other than their cancer diagnosis, was associated with  
53 lower QoL scores in all four cancer groups and mirrors findings from other studies<sup>2 36</sup>. The  
54  
55

1  
2  
3  
4  
5  
6  
7 presence of multi-morbidity and LTCs identifies sub-sets of survivors who may require more  
8 active support than others. This needs to be factored into risk stratification models as  
9 health services move away from hospital based cancer follow-up towards a greater focus on  
10 self-management.  
11

### 12 13 14 *Physical Activity*

15  
16 The extent to which cancer survivors take physical activity has not previously been reported  
17 in England. The findings agree with those from the USA<sup>37</sup>, suggesting that prostate survivors  
18 are more likely than others to take moderate or vigorous physical activity. We observed an  
19 association between higher levels of activity and higher QoL scores, but it is not possible to  
20 assess from a cross-sectional survey whether there is a causal relationship.  
21  
22

23  
24  
25 A smaller percentage of study respondents (21.4%) met the Chief Medical Officer of  
26 England's recommendations for physical activity when compared with the HSE(2008) in  
27 which 34% of adults met these guidelines<sup>34</sup>. Restricting the HSE data to a similar age profile  
28 as the study participants (60-75 years) saw similar levels of physical activity (23%). The HSE  
29 data found a trend of decreased physical activity with increasing age, yet, in this study,  
30 prostate survivors (the oldest subgroup) reported higher physical activity levels.  
31  
32  
33

### 34 35 36 *Limitations*

37 The presence of multiple cancer groups and time points, along with some missing data  
38 (typically <5%), may have resulted in a lack of power for certain analyses. [For example,](#)  
39 [investigating whether the quality of life of those living with recurrent disease differed from](#)  
40 [those survivors who had been 'cured'.](#) The non-response rate varied significantly by cancer  
41 group, deprivation category and age, which could result in selection bias when generalising  
42 results. ~~Our study excluded those treated in the private sector (estimated to be under 5% of~~  
43 ~~cancer cases in England<sup>38</sup>).~~[To overcome bias associated with deprivation and age, we](#)  
44 [propose extension of the pilot study to the largest possible cohorts available nationally;](#)  
45 [analyses and interpretation of this data will be performed with maximum sensitivity to](#)  
46 [these areas.](#)  
47  
48  
49  
50  
51  
52  
53  
54

1  
2  
3  
4  
5  
6  
7 Our study excluded those treated in the private sector (estimated to be under 5% of cancer  
8 cases in England<sup>38</sup>). Treatments may also have changed over the 1-5 year period used to  
9 select survivors and it is therefore possible for the results to reflect these changes.  
10 The study relied on self-reporting of long-term conditions, response to treatment and  
11 disease status. This information was not independently verified.

12  
13  
14  
15  
16 The highly skewed EQ5D outcome variable was categorised into three levels for  
17 multivariable modelling, which is not a standard approach and meant that information and  
18 perhaps discriminatory power was lost. However, our model parameterisation enabled a  
19 more natural interpretation of EQ5D QoL data and when comparisons were made with  
20 other alternative models, such as tobit regression, findings were very similar. We also  
21 acknowledge that measures related to the FACT component are primarily intended for use  
22 around the time of treatment rather than for survivorship work. Space limitations precluded  
23 a more detailed description of results incorporating the FACT and SDI components.  
24 However, a comprehensive report including these additional findings has been compiled  
25 and can be accessed via the DH website  
26 (<https://www.wp.dh.gov.uk/publications/files/2012/12/9284-TSO-2900701-PROMS.pdf>)  
27 URL  
28 <???

#### 35 36 *Where next for Cancer PROMS in England?*

37 The use of cancer PROMS has generally been restricted to clinical research, especially  
38 clinical trials or small studies. Whilst important work has been undertaken to develop  
39 approaches for the measurement of PROMS, they have not been incorporated into routine  
40 measurement at a whole health system level. This study demonstrates that population-  
41 based survey approaches are feasible and yield acceptable response rates ~~and are cost~~  
42 effective. This approach could provide important insights into where improvement efforts  
43 should be targeted to reduce the long-term burden of cancer and its treatments on the  
44 growing number of cancer survivors.

45  
46  
47  
48  
49  
50  
51 Improving QoL in patients with LTC is one of the key goals of English government health  
52 policy (forming Domain 2 of the NHS Outcomes Framework)<sup>39</sup>. The approach we report  
53 should be scaled up and integrated within routine health outcome assessment on a national

1  
2  
3  
4  
5  
6  
7 basis so that results can be distilled down to hospital/service provider level, as has been  
8 done in relation to the experience of acute care of cancer patients<sup>12</sup>. Improvements in  
9 quality of survivor care could then be driven by publishing hospital/provider level data. [As a  
10 result of the findings of this pilot, a national roll-out to all individuals diagnosed 1-3 years  
11 earlier with colorectal cancer in England is being performed in January 2013. A similar roll-  
12 out to those diagnosed with prostate cancer is planned whilst pilot questionnaires for those  
13 with bladder, cervical, endometrial and ovarian cancer are being prepared. To further  
14 understand the developmental trajectory of morbidity burden, a longitudinal survey of  
15 respondents to the pilot is being undertaken, with a survey 1 year on having been  
16 undertaken and consideration for a further data collection point after another 12 months.](#)

22  
23 Our findings support the on-going international efforts to identify risk factors for poor  
24 health-related QoL outcomes following a cancer diagnosis. These include the presence of  
25 other LTCs, deprivation and limited physical activity. These, along with the high prevalence  
26 of on-going condition-specific problems such as bowel, urinary and erectile dysfunction,  
27 warrant attention by cancer services.  
28  
29  
30  
31  
32  
33  
34  
35  
36  
37  
38  
39  
40  
41  
42  
43  
44  
45  
46  
47  
48  
49  
50  
51  
52  
53  
54  
55

### *Acknowledgements*

Dr Nicola Davies, Professor Jane Maher, Dr Mick Peake, Professor Galina Velikova and Dr Penny Wright provided expert advice regarding questionnaire and study design. Thames Cancer Registry, Eastern Cancer Registry and Information Centre, and West Midlands Cancer Intelligence Unit provided information on all eligible cancer survivors. FACIT provided permission to use components of the FACT questionnaires and Penny Wright granted permission to use the Social Difficulties Inventory.

### *Funding*

This survey was funded by the Department of Health, England.

[Open source access for BMJ Open was funded through a grant from Macmillan Cancer Support.](#)

### *Declaration of Competing Interests*

All authors have completed the Unified Competing Interest form at [www.icmje.org/coi\\_disclosure.pdf](http://www.icmje.org/coi_disclosure.pdf) (available on request from the corresponding author) and declare: financial support for the submitted work from the Department of Health, England: AWG, GH and MR were employed by the Cancer Policy Team, Department of Health, England, whilst the research was carried out; AWG, LKF, RGF and EF, received financial support from Department of Health, England, to carry out the analysis of data reported; JC and MR co-chaired the Department of Health, England, Cancer Patient Experience Advisory Group.

### *Data Sharing Statement*

Statistical code and dataset are available from the corresponding author at the University of Leeds, who will provide a permanent, citable and open access home for the dataset.

### *Author Contribution Statement*

Adam Glaser contributed to the study design, data collection, data analysis, data interpretation and writing of this manuscript.

Lorna Fraser contributed to the data analysis, data interpretation and writing of this manuscript.

1  
2  
3  
4  
5  
6  
7 Jessica Corner contributed to the study design, data collection, data interpretation and  
8 writing of this manuscript.

9  
10 Richard Feltbower contributed to the data analysis, data interpretation and writing of this  
11 manuscript.

12  
13 Eva Morris contributed to the data analysis, data interpretation and writing of this  
14 manuscript.

15  
16 Greg Hartwell contributed to the study design and data collection.

17  
18 Mike Richards contributed to the study design, data interpretation, and writing of this  
19 manuscript.

20  
21  
22 Copyright/licence for publication statement

23  
24 “The Corresponding Author has the right to grant on behalf of all authors and does grant on  
25 behalf of all authors, a worldwide licence to the Publishers and its licensees in perpetuity, in  
26 all forms, formats and media (whether known now or created in the future), to i) publish,  
27 reproduce, distribute, display and store the Contribution, ii) translate the Contribution into  
28 other languages, create adaptations, reprints, include within collections and create  
29 summaries, extracts and/or, abstracts of the Contribution, iii) create any other derivative  
30 work(s) based on the Contribution, iv) to exploit all subsidiary rights in the Contribution, v)  
31 the inclusion of electronic links from the Contribution to third party material where-ever it  
32 may be located; and, vi) licence any third party to do any or all of the above.”  
33  
34  
35  
36  
37  
38  
39  
40  
41  
42  
43  
44  
45  
46  
47  
48  
49  
50  
51  
52  
53  
54  
55

Table 1a Demographic data of responders and non-responders

| Characteristic                  |                             | Responders<br>(n=3300) |      | Non Responders<br>(n=1692) |      | Total<br>number<br>approached | Overall<br>Percentage<br>Responding |
|---------------------------------|-----------------------------|------------------------|------|----------------------------|------|-------------------------------|-------------------------------------|
|                                 |                             | n                      | %    | n                          | %    |                               |                                     |
| <b>Cancer<br/>Group</b>         | $\chi^2=18.8,$<br>$p<0.001$ |                        |      |                            |      |                               |                                     |
| Breast                          |                             | 854                    | 25.9 | 394                        | 23.3 | 1248                          | 68.4                                |
| Colorectal                      |                             | 802                    | 24.3 | 446                        | 26.4 | 1248                          | 64.3                                |
| NHL                             |                             | 778                    | 23.6 | 470                        | 27.8 | 1248                          | 62.3                                |
| Prostate                        |                             | 866                    | 26.2 | 382                        | 22.5 | 1248                          | 69.4                                |
| <b>Age</b>                      | $\chi^2=108,$<br>$p<0.001$  |                        |      |                            |      |                               |                                     |
| under 55                        |                             | 467                    | 14.2 | 282                        | 16.7 | 749                           | 62.3                                |
| 55 to 64                        |                             | 692                    | 21.0 | 335                        | 19.8 | 1027                          | 67.4                                |
| 65 to 74                        |                             | 1,108                  | 33.6 | 414                        | 24.5 | 1522                          | 72.8                                |
| 75 to 84                        |                             | 835                    | 25.3 | 434                        | 25.6 | 1269                          | 65.8                                |
| 85+                             |                             | 198                    | 6.0  | 227                        | 13.4 | 425                           | 46.6                                |
| <b>IMD<br/>Category</b>         | $\chi^2=55.9,$<br>$p<0.001$ |                        |      |                            |      |                               |                                     |
| 1 least<br>deprived             |                             | 826                    | 25.0 | 331                        | 19.6 | 1157                          | 71.4                                |
| 2                               |                             | 812                    | 24.6 | 357                        | 21.1 | 1169                          | 69.5                                |
| 3                               |                             | 703                    | 21.3 | 349                        | 20.7 | 1052                          | 66.8                                |
| 4                               |                             | 554                    | 16.8 | 352                        | 20.7 | 906                           | 61.1                                |
| 5 most<br>deprived              |                             | 399                    | 12.1 | 300                        | 17.7 | 699                           | 57.1                                |
| Missing                         |                             | 6                      | 0.2  | 3                          | 0.2  | 9                             | 66.7                                |
| <b>Time since<br/>Diagnosis</b> | $\chi^2=4.1,$<br>$p=0.25$   |                        |      |                            |      |                               |                                     |
| 1 year                          |                             | 848                    | 25.7 | 400                        | 23.6 | 1248                          | 67.9                                |
| 2 years                         |                             | 834                    | 25.3 | 414                        | 24.5 | 1248                          | 66.8                                |
| 3 years                         |                             | 806                    | 24.4 | 442                        | 26.1 | 1248                          | 64.6                                |
| 5 years                         |                             | 812                    | 24.6 | 436                        | 25.8 | 1248                          | 65.1                                |

Table 1b. Demographic Data by Cancer Group

| Characteristic                         |                               | Breast<br>(n=854) |      | Colorectal<br>(n=802) |      | Non Hodgkin's<br>Lymphoma<br>(n=778) |      | Prostate<br>(n=866) |      | Total<br>(n=3300) |      |
|----------------------------------------|-------------------------------|-------------------|------|-----------------------|------|--------------------------------------|------|---------------------|------|-------------------|------|
|                                        |                               | n                 | %    | n                     | %    | n                                    | %    | n                   | %    | n                 | %    |
| Sex                                    | $\chi^2=1700$ ,<br>$p<0.001$  |                   |      |                       |      |                                      |      |                     |      |                   |      |
| Male                                   |                               | 10                | 1.2  | 435                   | 54.2 | 419                                  | 53.9 | 848                 | 97.9 | 1712              | 51.9 |
| Female                                 |                               | 829               | 97.0 | 348                   | 43.4 | 352                                  | 45.2 | 0                   | 0    | 1529              | 46.3 |
| Missing                                |                               | 15                | 1.8  | 19                    | 2.4  | 7                                    | 0.9  | 18                  | 2.1  | 59                | 1.8  |
| Age                                    | $\chi^2=401$ ,<br>$p<0.001$   |                   |      |                       |      |                                      |      |                     |      |                   |      |
| under 55                               |                               | 231               | 27.0 | 57                    | 7.1  | 157                                  | 20.2 | 157                 | 18.1 | 467               | 14.2 |
| 55 to 64                               |                               | 237               | 27.8 | 136                   | 17.0 | 173                                  | 22.2 | 173                 | 20.0 | 692               | 21.0 |
| 65 to 74                               |                               | 224               | 26.2 | 280                   | 34.9 | 238                                  | 30.6 | 238                 | 27.5 | 1,108             | 33.6 |
| 75 to 84                               |                               | 122               | 14.3 | 246                   | 30.7 | 175                                  | 22.5 | 175                 | 20.2 | 835               | 25.3 |
| 85+                                    |                               | 40                | 4.7  | 83                    | 10.3 | 35                                   | 4.5  | 35                  | 4.0  | 198               | 6.0  |
| Ethnicity                              | $\chi^2=74.6$ ,<br>$p<0.001$  |                   |      |                       |      |                                      |      |                     |      |                   |      |
| White                                  |                               | 768               | 89.9 | 740                   | 92.3 | 688                                  | 88.4 | 786                 | 90.8 | 2982              | 90.4 |
| Asian                                  |                               | 35                | 4.1  | 19                    | 2.3  | 30                                   | 3.9  | 15                  | 1.7  | 99                | 3.0  |
| Black                                  |                               | 14                | 1.6  | 11                    | 1.4  | 21                                   | 2.7  | 36                  | 4.2  | 82                | 2.5  |
| Mixed                                  |                               | 4                 | 0.5  | 5                     | 0.6  | 6                                    | 0.8  | 1                   | 0.1  | 16                | 0.5  |
| Other                                  |                               | 4                 | 0.5  | 0                     | 0    | 4                                    | 0.5  | 3                   | 0.3  | 11                | 0.3  |
| Missing                                |                               | 29                | 3.4  | 27                    | 3.4  | 29                                   | 3.7  | 25                  | 2.9  | 110               | 3.3  |
| IMD<br>Category                        | $\chi^2=4.3$ ,<br>$p=0.97$    |                   |      |                       |      |                                      |      |                     |      |                   |      |
| 1 least<br>deprived                    |                               | 211               | 24.7 | 198                   | 24.7 | 202                                  | 26.0 | 215                 | 24.8 | 826               | 25.0 |
| 2                                      |                               | 210               | 24.6 | 199                   | 24.8 | 183                                  | 23.5 | 220                 | 25.4 | 812               | 24.6 |
| 3                                      |                               | 184               | 21.5 | 159                   | 19.8 | 177                                  | 22.7 | 183                 | 21.1 | 703               | 21.3 |
| 4                                      |                               | 141               | 16.5 | 147                   | 18.3 | 125                                  | 16.1 | 141                 | 16.3 | 554               | 16.8 |
| 5 most<br>deprived                     |                               | 104               | 12.2 | 98                    | 12.2 | 91                                   | 11.7 | 106                 | 12.2 | 399               | 12.1 |
| Missing                                |                               | 4                 | 0.5  | 1                     | 0.1  | 0                                    | 0    | 1                   | 0.1  | 6                 | 0.2  |
| Time since<br>Diagnosis                | $\chi^2=5.5$ ,<br>$p=0.78$    |                   |      |                       |      |                                      |      |                     |      |                   |      |
| 1 year                                 |                               | 215               | 25.2 | 202                   | 25.2 | 197                                  | 25.3 | 234                 | 27.0 | 848               | 25.7 |
| 2 years                                |                               | 212               | 24.8 | 215                   | 26.8 | 187                                  | 24.0 | 220                 | 25.4 | 834               | 25.3 |
| 3 years                                |                               | 204               | 23.9 | 195                   | 24.3 | 207                                  | 26.6 | 200                 | 23.1 | 806               | 24.4 |
| 5 years                                |                               | 223               | 26.1 | 190                   | 23.7 | 187                                  | 24.0 | 212                 | 24.5 | 812               | 24.6 |
| Other Long<br>Term Health<br>Condition | $\chi^2=12.1$ ,<br>$p=0.06$   |                   |      |                       |      |                                      |      |                     |      |                   |      |
| Yes                                    |                               | 435               | 50.9 | 432                   | 53.9 | 435                                  | 55.9 | 501                 | 57.9 | 1803              | 54.6 |
| No                                     |                               | 353               | 41.3 | 309                   | 38.5 | 287                                  | 36.9 | 299                 | 34.5 | 1248              | 37.8 |
| Don't Know                             |                               | 30                | 3.5  | 23                    | 2.9  | 33                                   | 4.2  | 27                  | 3.1  | 113               | 3.4  |
| Missing                                |                               | 36                | 4.2  | 38                    | 4.7  | 23                                   | 3.0  | 39                  | 4.5  | 136               | 4.1  |
| Disease<br>Status                      | $\chi^2=390.0$ ,<br>$p<0.001$ |                   |      |                       |      |                                      |      |                     |      |                   |      |
| Remission                              |                               | 677               | 79.3 | 625                   | 77.9 | 526                                  | 67.6 | 399                 | 46.1 | 2227              | 67.5 |
| Rx but<br>present                      |                               | 26                | 3.0  | 32                    | 4.0  | 81                                   | 10.4 | 144                 | 16.6 | 283               | 8.6  |
| Not treated                            |                               | 4                 | 0.5  | 6                     | 0.7  | 43                                   | 5.5  | 78                  | 9.0  | 131               | 4.0  |



1  
2  
3  
4  
5  
6  
7  
8  
9  
10  
11  
12  
13  
14  
15  
16  
17  
18  
19  
20  
21  
22  
23  
24  
25  
26  
27  
28  
29  
30  
31  
32  
33  
34  
35  
36  
37  
38  
39  
40  
41  
42  
43  
44  
45  
46  
47  
48  
49  
50  
51  
52  
53  
54  
55  
56  
57  
58  
59  
60

|                   |  |    |     |    |     |    |     |     |      |     |     |
|-------------------|--|----|-----|----|-----|----|-----|-----|------|-----|-----|
| <b>Recurrence</b> |  | 30 | 3.5 | 20 | 2.5 | 30 | 3.9 | 8   | 0.9  | 88  | 2.6 |
| <b>Not sure</b>   |  | 58 | 6.8 | 69 | 8.6 | 53 | 6.8 | 140 | 16.2 | 320 | 9.7 |
| <b>Missing</b>    |  | 59 | 6.9 | 50 | 6.2 | 45 | 5.8 | 97  | 11.2 | 251 | 7.6 |

For peer review only



Table 2. EQ5D outcome category by cancer sub-group

| EQ5D Categories                  | 'High' QoL<br>(Scores=1) |      | Medium QoL<br>(0.5≤Scores<1) |      | Low QoL<br>(Scores<0.5) |      | Missing |     |
|----------------------------------|--------------------------|------|------------------------------|------|-------------------------|------|---------|-----|
|                                  | n                        | %    | n                            | %    | n                       | %    | n       | %   |
| <b>Breast</b>                    | 208                      | 24.4 | 514                          | 60.2 | 76                      | 8.9  | 56      | 6.6 |
| <b>Colorectal</b>                | 255                      | 31.2 | 434                          | 54.1 | 87                      | 10.8 | 26      | 3.2 |
| <b>Non Hodgkins<br/>Lymphoma</b> | 247                      | 31.7 | 398                          | 51.2 | 102                     | 13.1 | 31      | 4.0 |
| <b>Prostate</b>                  | 347                      | 40.0 | 390                          | 45.0 | 81                      | 9.4  | 48      | 5.5 |
| <b>Total</b>                     | 1057                     | 32.0 | 1736                         | 52.6 | 346                     | 10.5 | 161     | 4.9 |

Table 3a. Ordered Logistic Regression Model EQ5D in Breast Cancer Patients [n=709, pseudoR<sup>2</sup>=0.16 p<0.001]

| Characteristic                       | Odds Ratio* | 95% CI     | P value |
|--------------------------------------|-------------|------------|---------|
| <b>Age (years)</b>                   |             |            |         |
| <55 years                            | REF         |            |         |
| 55-64                                | 0.69        | 0.45 1.06  | 0.09    |
| 65-74                                | 0.36        | 0.22 0.58  | <0.001  |
| 75-84                                | 0.59        | 0.32 1.08  | 0.09    |
| 85+                                  | 1.61        | 0.57 4.52  | 0.36    |
| <b>Deprivation</b>                   |             |            |         |
| 1 least deprived                     | REF         |            |         |
| 2                                    | 1.03        | 0.66 1.62  | 0.88    |
| 3                                    | 1.10        | 0.68 1.77  | 0.71    |
| 4                                    | 0.93        | 0.55 1.56  | 0.78    |
| 5 most deprived                      | 3.00        | 1.64 5.50  | <0.001  |
| <b>Physical Activity†</b>            | 0.88        | 0.82 0.95  | <0.001  |
| <b>Number of other LTC (excl BP)</b> |             |            |         |
| 0                                    | REF         |            |         |
| 1                                    | 1.84        | 1.25 2.70  | 0.002   |
| 2+                                   | 7.30        | 4.45 11.93 | <0.001  |
| <b>Treatment*</b>                    |             |            |         |
| Radio+Chemo+Surgery+Hormone          | REF         |            |         |
| Radio +Chemo+Surgery                 | 0.67        | 0.38 1.20  | 0.18    |
| Radio+Surgery                        | 0.51        | 0.29 0.90  | 0.02    |
| Radio+Surgery+Hormone                | 0.56        | 0.33 0.96  | 0.04    |
| Surgery only                         | 1.00        | 0.55 1.84  | 0.99    |
| Other                                | 0.92        | 0.53 1.58  | 0.76    |
| <b>Ethnicity</b>                     |             |            |         |
| White                                | REF         |            |         |
| Mixed                                | 0.50        | 0.06 4.29  | 0.53    |
| Asian                                | 1.96        | 0.77 5.01  | 0.16    |
| Black                                | 0.29        | 0.08 0.98  | 0.05    |
| Other                                | 2.20        | 0.17 29.32 | 0.55    |
| <b>Disease Status</b>                |             |            |         |
| Remission                            | REF         |            |         |
| Rx but present                       | 1.49        | 0.56 3.93  | 0.43    |
| Not treated                          | .           | .          | .       |
| Recurrence                           | 4.70        | 1.92 11.52 | 0.001   |
| Not sure                             | 2.51        | 1.27 4.96  | 0.008   |
| <b>Time since Diagnosis</b>          |             |            |         |
| 1 year                               | REF         |            |         |
| 2 years                              | 1.02        | 0.64 1.62  | 0.95    |
| 3 years                              | 0.88        | 0.55 1.41  | 0.60    |
| 5 years                              | 0.93        | 0.59 1.47  | 0.76    |

\*Odds of reporting 'medium' or 'low' QoL EQ5D scores compared to 'high' QoL scores where 'high', 'medium' and 'low' QoL was defined as scores=1, 0.5≤scores<1 and scores<0.5 respectively.

†Amount of physical activity performed each week quantified according to the Chief Medical Officer of England's recommendations<sup>16</sup>

Table 3b. Ordered Logistic Regression Model EQ5D in Colorectal Patients [n=485, pseudoR2=0.18, p&lt;0.001]

| Characteristic                       | Odds Ratio | 95% CI |       | P value |
|--------------------------------------|------------|--------|-------|---------|
| <b>Age (years)</b>                   |            |        |       |         |
| <55 years                            | REF        |        |       |         |
| 55-64                                | 1.28       | 0.59   | 2.75  | 0.53    |
| 65-74                                | 1.16       | 0.57   | 2.35  | 0.69    |
| 75-84                                | 1.23       | 0.57   | 2.64  | 0.59    |
| 85+                                  | 2.45       | 0.93   | 6.41  | 0.07    |
| <b>Sex</b>                           |            |        |       |         |
| Male                                 | REF        |        |       |         |
| Female                               | 1.22       | 0.81   | 1.82  | 0.34    |
| <b>Deprivation</b>                   |            |        |       |         |
| 1 least deprived                     | REF        |        |       |         |
| 2                                    | 0.83       | 0.48   | 1.43  | 0.50    |
| 3                                    | 0.57       | 0.33   | 1.00  | 0.05    |
| 4                                    | 0.62       | 0.34   | 1.13  | 0.12    |
| 5 most deprived                      | 1.17       | 0.58   | 2.34  | 0.66    |
| <b>Physical Activity†</b>            | 0.83       | 0.76   | 0.90  | <0.001  |
| <b>Number of other LTC(excl BP)</b>  |            |        |       |         |
| 0                                    | REF        |        |       |         |
| 1                                    | 2.09       | 1.29   | 3.37  | <0.001  |
| 2+                                   | 4.83       | 2.85   | 8.21  | <0.001  |
| <b>Treatment*</b>                    |            |        |       |         |
| Surgery only                         | REF        |        |       |         |
| Radio+Chemo+Surgery                  | 1.15       | 0.60   | 2.21  | 0.67    |
| Chemo+Surgery                        | 1.35       | 0.85   | 2.17  | 0.21    |
| Other                                | 1.58       | 0.77   | 3.22  | 0.21    |
| <b>Ethnicity</b>                     |            |        |       |         |
| White                                | REF        |        |       |         |
| Mixed                                | 1.72       | 0.24   | 12.42 | 0.59    |
| Asian                                | 1.99       | 0.46   | 8.54  | 0.36    |
| Black                                | 1.14       | 0.26   | 4.92  | 0.86    |
| Other                                | 1.72       | 0.24   | 12.42 | 0.59    |
| <b>Disease Status</b>                |            |        |       |         |
| Remission                            | REF        |        |       |         |
| Rx but present                       | 7.03       | 2.44   | 20.21 | <0.001  |
| Not treated                          | 0.16       | 0.01   | 2.63  | 0.20    |
| Recurrence                           | 4.56       | 1.54   | 13.49 | 0.01    |
| Not sure                             | 2.67       | 1.23   | 5.79  | 0.01    |
| <b>Stoma</b>                         |            |        |       |         |
| No                                   | REF        |        |       |         |
| Yes                                  | 1.32       | 0.80   | 2.19  | 0.27    |
| <b>Difficulty Controlling Bowels</b> |            |        |       |         |
| No                                   | REF        |        |       |         |
| Yes                                  | 2.30       | 1.43   | 3.72  | <0.001  |
| <b>Leak Urine</b>                    |            |        |       |         |
| No                                   | REF        |        |       |         |
| Yes                                  | 1.41       | 0.87   | 2.30  | 0.16    |
| <b>Time since Diagnosis</b>          |            |        |       |         |
| 1 year                               | REF        |        |       |         |
| 2 years                              | 0.72       | 0.42   | 1.22  | 0.22    |
| 3 years                              | 1.03       | 0.59   | 1.81  | 0.92    |
| 5 years                              | 0.85       | 0.49   | 1.48  | 0.56    |

1  
2  
3  
4  
5  
6  
7  
8  
9  
10  
11  
12  
13  
14  
15  
16  
17  
18  
19  
20  
21  
22  
23  
24  
25  
26  
27  
28  
29  
30  
31  
32  
33  
34  
35  
36  
37  
38  
39  
40  
41  
42  
43  
44  
45  
46  
47  
48  
49  
50  
51  
52  
53  
54  
55  
56  
57  
58  
59  
60

\*Odds of reporting 'medium' or 'low' QoL EQ5D scores compared to 'high' QoL scores where 'high', 'medium' and 'low' QoL was defined as scores=1,  $0.5 \leq \text{scores} < 1$  and  $\text{scores} < 0.5$  respectively.

†Amount of physical activity performed each week quantified according to the Chief Medical Officer of England's recommendations<sup>16</sup>

For peer review only

Table 3c. Ordered Logistic Regression Model EQ5D in NHL Patients [n=614, pseudoR2=0.15 p&lt;0.001]

| Characteristic                            | Odds Ratio | 95% CI |       | P value |
|-------------------------------------------|------------|--------|-------|---------|
| <b>Age (years)</b>                        |            |        |       |         |
| <55 years                                 | REF        |        |       |         |
| 55-64                                     | 0.89       | 0.55   | 1.45  | 0.65    |
| 65-74                                     | 1.23       | 0.75   | 1.99  | 0.41    |
| 75-84                                     | 1.60       | 0.94   | 2.73  | 0.08    |
| 85+                                       | 2.13       | 0.84   | 5.39  | 0.11    |
| <b>Sex</b>                                |            |        |       |         |
| Male                                      | REF        |        |       |         |
| Female                                    | 1.25       | 0.89   | 1.74  | 0.19    |
| <b>Deprivation</b>                        |            |        |       |         |
| 1 least deprived                          | REF        |        |       |         |
| 2                                         | 1.06       | 0.67   | 1.69  | 0.80    |
| 3                                         | 1.21       | 0.75   | 1.95  | 0.43    |
| 4                                         | 1.64       | 0.97   | 2.76  | 0.07    |
| 5 most deprived                           | 1.19       | 0.65   | 2.21  | 0.57    |
| Physical Activity†                        | 0.91       | 0.84   | 0.98  | 0.01    |
| <b>Number of other LTC (excluding BP)</b> |            |        |       |         |
| 0                                         | REF        |        |       |         |
| 1                                         | 2.16       | 1.44   | 3.24  | <0.001  |
| 2+                                        | 7.26       | 4.51   | 11.69 | <0.001  |
| <b>Treatment*</b>                         |            |        |       |         |
| Chemo only                                | REF        |        |       |         |
| Radio+Chemo                               | 0.81       | 0.47   | 1.41  | 0.46    |
| Chemo + Antibody                          | 0.93       | 0.55   | 1.59  | 0.80    |
| Radio+Chemo+Other                         | 1.55       | 0.87   | 2.77  | 0.14    |
| Other                                     | 0.96       | 0.63   | 1.46  | 0.86    |
| <b>Ethnicity</b>                          |            |        |       |         |
| White                                     | REF        |        |       |         |
| Mixed                                     | 2.78       | 0.28   | 27.7  | 0.38    |
| Asian                                     | 0.68       | 0.29   | 1.59  | 0.38    |
| Black                                     | 0.91       | 0.33   | 2.49  | 0.85    |
| Other                                     | 0.61       | 0.09   | 4.39  | 0.62    |
| <b>Disease Status</b>                     |            |        |       |         |
| Remission                                 | REF        |        |       |         |
| Rx but present                            | 2.57       | 1.52   | 4.33  | <0.001  |
| Not treated                               | 0.83       | 0.17   | 3.96  | 0.82    |
| Recurrence                                | 3.73       | 1.68   | 8.29  | 0.001   |
| Not sure                                  | 3.04       | 1.58   | 5.84  | 0.001   |
| <b>Time since Diagnosis</b>               |            |        |       |         |
| 1 year                                    | REF        |        |       |         |
| 2 years                                   | 0.62       | 0.38   | 0.99  | 0.05    |
| 3 years                                   | 0.60       | 0.38   | 0.96  | 0.03    |
| 5 years                                   | 0.57       | 0.36   | 0.90  | 0.02    |

\*Odds of reporting 'medium' or 'low' QoL EQ5D scores compared to 'high' QoL scores where 'high', 'medium' and 'low' QoL was defined as scores=1,  $0.5 \leq \text{scores} < 1$  and scores < 0.5 respectively.

†Amount of physical activity performed each week quantified according to the Chief Medical Officer of England's recommendations<sup>16</sup>

Table 3d. Ordered Logistic Regression Model EQ5D in Prostate Patients [n=524, pseudoR2=0.22 p&lt;0.001]

| Characteristic                       | Odds Ratio | 95% CI |        | P value |
|--------------------------------------|------------|--------|--------|---------|
| <b>Age (years)</b>                   |            |        |        |         |
| <55 years                            | REF        |        |        |         |
| 55-64                                | 1.32       | 0.41   | 4.30   | 0.64    |
| 65-74                                | 1.72       | 0.55   | 5.38   | 0.36    |
| 75-84                                | 1.32       | 0.41   | 4.30   | 0.64    |
| 85+                                  | 1.92       | 0.42   | 8.78   | 0.40    |
| <b>Deprivation</b>                   |            |        |        |         |
| 1 least deprived                     | REF        |        |        |         |
| 2                                    | 1.09       | 0.64   | 1.85   | 0.74    |
| 3                                    | 1.19       | 0.68   | 2.08   | 0.55    |
| 4                                    | 1.61       | 0.88   | 2.95   | 0.13    |
| 5 most deprived                      | 2.57       | 1.31   | 5.04   | 0.01    |
| Physical Activity†                   | 0.82       | 0.75   | 0.88   | <0.001  |
| <b>Number of other LTC(excl BP)</b>  |            |        |        |         |
| 0                                    | REF        |        |        |         |
| 1                                    | 1.55       | 0.94   | 2.54   | 0.09    |
| 2+                                   | 4.28       | 2.62   | 7.01   | <0.001  |
| <b>Treatment*</b>                    |            |        |        |         |
| Radio+Hormone                        | REF        |        |        |         |
| Surgery only                         | 0.39       | 0.21   | 0.71   | <0.001  |
| Hormone only                         | 1.68       | 0.85   | 3.33   | 0.14    |
| Radio only                           | 0.94       | 0.53   | 1.66   | 0.83    |
| Active surveillance only             | 1.16       | 0.47   | 2.88   | 0.75    |
| Other                                | .          | .      | .      | .       |
| <b>Ethnicity</b>                     |            |        |        |         |
| White                                | REF        |        |        |         |
| Mixed                                | 3.82       | 0.07   | 203.44 | 0.51    |
| Asian                                | 3.21       | 0.56   | 18.49  | 0.19    |
| Black                                | 2.54       | 0.96   | 6.73   | 0.06    |
| Other                                | 0.00       | 0.00   | .      | 0.98    |
| <b>Disease Status</b>                |            |        |        |         |
| Remission                            | REF        |        |        |         |
| Rx but present                       | 1.75       | 0.94   | 3.26   | 0.08    |
| Not treated                          | 1.06       | 0.37   | 3.05   | 0.91    |
| Recurrence                           | 1.71       | 0.17   | 16.91  | 0.65    |
| Not sure                             | 1.48       | 0.85   | 2.58   | 0.17    |
| <b>Urinary Leakage</b>               |            |        |        |         |
| No                                   | REF        |        |        |         |
| Yes                                  | 3.52       | 2.32   | 5.35   | <0.001  |
| <b>Erectile Dysfunction</b>          |            |        |        |         |
| No                                   | REF        |        |        |         |
| Yes                                  | 1.46       | 0.96   | 2.23   | 0.08    |
| <b>Difficulty Controlling Bowels</b> |            |        |        |         |
| No                                   | REF        |        |        |         |
| Yes                                  | 1.62       | 0.90   | 2.92   | 0.10    |
| <b>Time since Diagnosis</b>          |            |        |        |         |
| 1 year                               | REF        |        |        |         |
| 2 years                              | 0.83       | 0.50   | 1.40   | 0.49    |
| 3 years                              | 0.80       | 0.47   | 1.36   | 0.41    |
| 5 years                              | 0.77       | 0.45   | 1.33   | 0.36    |

1  
2  
3  
4  
5  
6  
7 \*Odds of reporting 'medium' or 'low' QoL EQ5D scores compared to 'high' QoL scores where 'high', 'medium'  
8 and 'low' QoL was defined as scores=1,  $0.5 \leq \text{scores} < 1$  and  $\text{scores} < 0.5$  respectively.

9 †[Amount of physical activity performed each week quantified according to the Chief Medical Officer of](#)  
10 [England's recommendations](#)<sup>16</sup>

11  
12  
13  
14  
15  
16  
17  
18  
19  
20  
21  
22  
23  
24  
25  
26  
27  
28  
29  
30  
31  
32  
33  
34  
35  
36  
37  
38  
39  
40  
41  
42  
43  
44  
45  
46  
47  
48  
49  
50  
51  
52  
53  
54  
55  
56  
57  
58  
59  
60

For peer review only



Table 4. Comparison of Quality of Life scores with other population data

|                                 | Health Survey for England (HSE 2008) <sup>34</sup> |                 | GP Population Survey (GPPS) <sup>35</sup> | GP Population Survey (GPPS) <sup>35</sup> | This survey |                          |
|---------------------------------|----------------------------------------------------|-----------------|-------------------------------------------|-------------------------------------------|-------------|--------------------------|
|                                 | All ages                                           | Ages ≥ 45 years | All                                       | No LTC                                    | All         | In remission with no LTC |
| Number of respondents           | 14116                                              | 7672            | 426933                                    | 193285                                    | 3300        | 848                      |
| Median age                      | 48                                                 | 63              | 48                                        | 39                                        | 69.3        | 63.2                     |
| 'High' QOL (Scores=1)           | 56.0%                                              | 45.4%           | 50.6%                                     | 73.8%                                     | 32.0%       | 51.4%                    |
| 'Medium' QOL (0.5 ≤ Scores < 1) | 37.7%                                              | 45.6%           | 41.6%                                     | 25.2%                                     | 52.6%       | 44.3%                    |
| 'Low' QOL (Scores < 0.5)        | 6.3%                                               | 9.0%            | 7.8%                                      | 0.9%                                      | 10.5%       | 2.1%                     |

Supplementary Table 1. Quality of Life Dimension Results (EQ5D) by Cancer Sub group

| EQ5D dimension                                                 |                                | Breast<br>(n=854) |      | Colorectal<br>(n=802) |      | Non<br>Hodgkin's<br>Lymphoma<br>(n=778) |      | Prostate<br>(n=866) |      | Total<br>(n=3300) |      |
|----------------------------------------------------------------|--------------------------------|-------------------|------|-----------------------|------|-----------------------------------------|------|---------------------|------|-------------------|------|
|                                                                |                                | n                 | %    | n                     | %    | n                                       | %    | n                   | %    | n                 | %    |
| <b>Mobility</b><br>$\chi^2=51.3$ ,<br>$p<0.001$                | No Problems                    | 567               | 66.4 | 442                   | 55.1 | 427                                     | 54.9 | 535                 | 61.8 | 1971              | 59.7 |
|                                                                | Slight Problems                | 105               | 12.3 | 159                   | 19.8 | 140                                     | 18.0 | 131                 | 15.1 | 535               | 16.2 |
|                                                                | Moderate Problems              | 107               | 12.5 | 120                   | 15.0 | 120                                     | 15.4 | 97                  | 11.2 | 444               | 13.5 |
|                                                                | Severe Problems                | 46                | 5.4  | 57                    | 7.1  | 71                                      | 9.1  | 69                  | 8.0  | 243               | 7.4  |
|                                                                | Cannot walk                    | 8                 | 0.9  | 13                    | 1.6  | 6                                       | 0.8  | 4                   | 0.4  | 31                | 0.9  |
|                                                                | Missing                        | 21                | 2.5  | 11                    | 1.4  | 14                                      | 1.8  | 30                  | 3.5  | 76                | 2.3  |
| <b>Self Care</b><br>$\chi^2=30.4$ ,<br>$p=0.002$               | No Problems                    | 716               | 83.8 | 651                   | 81.2 | 611                                     | 78.5 | 704                 | 81.3 | 2682              | 81.3 |
|                                                                | Slight Problems                | 47                | 5.5  | 67                    | 8.4  | 66                                      | 8.5  | 78                  | 9.0  | 258               | 7.8  |
|                                                                | Moderate Problems              | 45                | 5.3  | 46                    | 5.7  | 71                                      | 9.1  | 44                  | 5.1  | 206               | 6.2  |
|                                                                | Severe Problems                | 12                | 1.4  | 18                    | 2.2  | 12                                      | 1.5  | 9                   | 1.0  | 51                | 1.5  |
|                                                                | Cannot wash/dress              | 6                 | 0.7  | 9                     | 1.1  | 4                                       | 0.5  | 4                   | 0.5  | 23                | 0.7  |
|                                                                | Missing                        | 28                | 3.3  | 11                    | 1.4  | 14                                      | 1.8  | 27                  | 3.1  | 80                | 2.4  |
| <b>Usual<br/>Activities</b><br>$\chi^2=34.5$ ,<br>$p<0.001$    | No Problems                    | 513               | 60.1 | 429                   | 53.5 | 411                                     | 52.8 | 533                 | 61.5 | 1886              | 57.2 |
|                                                                | Slight Problems                | 162               | 19.0 | 173                   | 21.6 | 156                                     | 20.1 | 145                 | 16.7 | 636               | 19.3 |
|                                                                | Moderate Problems              | 111               | 13.0 | 113                   | 14.1 | 127                                     | 16.3 | 104                 | 12.1 | 455               | 13.7 |
|                                                                | Severe Problems                | 31                | 3.6  | 48                    | 6.0  | 49                                      | 6.3  | 43                  | 5.0  | 171               | 5.2  |
|                                                                | Cannot do usual activities     | 14                | 1.6  | 24                    | 3.0  | 26                                      | 3.3  | 15                  | 1.7  | 79                | 2.4  |
|                                                                | Missing                        | 23                | 2.7  | 15                    | 1.8  | 9                                       | 1.2  | 26                  | 3.0  | 73                | 2.2  |
| <b>Pain</b><br>$\chi^2=134.3$ ,<br>$p<0.001$                   | No Pain                        | 329               | 38.5 | 429                   | 53.5 | 408                                     | 52.4 | 526                 | 60.7 | 1692              | 51.3 |
|                                                                | Slight Pain                    | 341               | 39.9 | 220                   | 27.4 | 180                                     | 23.1 | 169                 | 19.5 | 910               | 27.6 |
|                                                                | Moderate Pain                  | 113               | 13.2 | 92                    | 11.5 | 120                                     | 15.4 | 101                 | 11.7 | 426               | 12.9 |
|                                                                | Severe Pain                    | 39                | 4.6  | 35                    | 4.4  | 51                                      | 6.6  | 38                  | 4.4  | 163               | 4.9  |
|                                                                | Extreme Pain                   | 5                 | 0.6  | 9                     | 1.1  | 10                                      | 1.3  | 3                   | 0.3  | 27                | 0.8  |
|                                                                | Missing                        | 27                | 3.2  | 17                    | 2.1  | 9                                       | 1.2  | 29                  | 3.3  | 82                | 2.5  |
| <b>Anxiety/<br/>depression</b><br>$\chi^2=37.1$ ,<br>$p<0.001$ | No anxiety/depression          | 475               | 55.6 | 504                   | 62.8 | 464                                     | 59.6 | 566                 | 65.4 | 2009              | 60.9 |
|                                                                | Slight anxiety/depression      | 241               | 28.2 | 196                   | 24.4 | 186                                     | 23.9 | 183                 | 21.1 | 806               | 24.4 |
|                                                                | Moderate<br>anxiety/depression | 78                | 9.1  | 78                    | 9.7  | 83                                      | 10.7 | 76                  | 8.8  | 315               | 9.5  |
|                                                                | Severe anxiety/depression      | 21                | 2.5  | 6                     | 0.8  | 21                                      | 2.7  | 8                   | 0.9  | 56                | 1.7  |
|                                                                | Extreme<br>anxiety/depression  | 10                | 1.2  | 4                     | 0.5  | 8                                       | 1.0  | 4                   | 0.5  | 26                | 0.8  |
|                                                                | Missing                        | 29                | 3.4  | 14                    | 1.8  | 16                                      | 2.1  | 29                  | 3.3  | 88                | 2.7  |

Supplementary Table 2 Quality of Life Dimension Results (EQ5D) by time since diagnosis of cancer

|                           |                             | 1 year<br>(n=848) |      | 2 years<br>(n=834) |      | 3 years<br>(n=806) |      | 5 years<br>(n=812) |      | Total<br>(n=3300) |      |
|---------------------------|-----------------------------|-------------------|------|--------------------|------|--------------------|------|--------------------|------|-------------------|------|
|                           |                             | N                 | %    | N                  | %    | N                  | %    | N                  | %    | N                 | %    |
| <b>Mobility</b>           | No Problems                 | 521               | 61.4 | 501                | 60.1 | 486                | 60.3 | 463                | 57.0 | 1971              | 59.7 |
|                           | $\chi^2=21.1, p=0.05$       |                   |      |                    |      |                    |      |                    |      |                   |      |
|                           | Slight Problems             | 150               | 17.7 | 123                | 14.7 | 127                | 15.8 | 135                | 16.6 | 535               | 16.2 |
|                           | Moderate Problems           | 93                | 11.0 | 116                | 13.9 | 104                | 12.9 | 131                | 13.1 | 444               | 13.5 |
|                           | Severe Problems             | 62                | 7.3  | 62                 | 7.4  | 56                 | 6.9  | 63                 | 7.8  | 243               | 7.4  |
|                           | Cannot walk                 | 2                 | 0.2  | 8                  | 9.6  | 13                 | 1.6  | 8                  | 1.0  | 31                | 0.9  |
|                           | Missing                     | 20                | 2.4  | 24                 | 2.9  | 20                 | 2.5  | 12                 | 1.5  | 76                | 2.3  |
| <b>Self Care</b>          | No Problems                 | 696               | 82.1 | 674                | 80.8 | 659                | 81.8 | 653                | 80.4 | 2682              | 81.3 |
|                           | $\chi^2=10.2, p=0.59$       |                   |      |                    |      |                    |      |                    |      |                   |      |
|                           | Slight Problems             | 59                | 6.9  | 65                 | 7.8  | 61                 | 7.6  | 73                 | 9.0  | 258               | 7.8  |
|                           | Moderate Problems           | 57                | 6.7  | 56                 | 6.7  | 42                 | 5.2  | 51                 | 6.3  | 206               | 6.2  |
|                           | Severe Problems             | 12                | 1.4  | 12                 | 1.4  | 14                 | 1.7  | 13                 | 1.6  | 51                | 1.5  |
|                           | Cannot wash/dress           | 3                 | 0.4  | 4                  | 0.5  | 10                 | 1.2  | 6                  | 0.7  | 23                | 0.7  |
|                           | Missing                     | 21                | 2.5  | 23                 | 2.8  | 20                 | 2.5  | 16                 | 2.0  | 80                | 2.4  |
| <b>Usual Activities</b>   | No Problems                 | 465               | 54.8 | 474                | 56.8 | 465                | 57.7 | 482                | 59.4 | 1886              | 57.2 |
|                           | $\chi^2=13.9, p=0.31$       |                   |      |                    |      |                    |      |                    |      |                   |      |
|                           | Slight Problems             | 181               | 21.3 | 157                | 18.8 | 161                | 20.0 | 137                | 16.9 | 636               | 19.3 |
|                           | Moderate Problems           | 131               | 15.4 | 112                | 13.4 | 95                 | 11.8 | 117                | 14.4 | 455               | 13.7 |
|                           | Severe Problems             | 35                | 4.1  | 45                 | 5.4  | 44                 | 5.5  | 47                 | 5.8  | 171               | 5.2  |
|                           | Cannot do usual activities  | 18                | 2.1  | 19                 | 2.3  | 23                 | 2.8  | 19                 | 2.3  | 79                | 2.4  |
|                           | Missing                     | 18                | 2.1  | 27                 | 3.2  | 18                 | 2.2  | 10                 | 1.2  | 73                | 2.2  |
| <b>Pain</b>               | No Pain                     | 421               | 49.6 | 412                | 49.4 | 435                | 54.0 | 424                | 52.2 | 1692              | 51.3 |
|                           | $\chi^2=18.0, p=0.12$       |                   |      |                    |      |                    |      |                    |      |                   |      |
|                           | Slight Pain                 | 262               | 30.9 | 237                | 28.4 | 198                | 24.6 | 213                | 26.2 | 910               | 27.6 |
|                           | Moderate Pain               | 101               | 11.9 | 112                | 13.4 | 105                | 13.0 | 108                | 13.3 | 426               | 12.9 |
|                           | Severe Pain                 | 34                | 4.0  | 44                 | 5.3  | 38                 | 4.7  | 47                 | 5.8  | 163               | 4.9  |
|                           | Extreme Pain                | 7                 | 0.8  | 6                  | 0.7  | 11                 | 1.4  | 3                  | 0.4  | 27                | 0.8  |
|                           | Missing                     | 23                | 2.7  | 23                 | 2.8  | 19                 | 2.4  | 17                 | 2.1  | 82                | 2.5  |
| <b>Anxiety/depression</b> | No anxiety/depression       | 466               | 55.0 | 505                | 60.6 | 499                | 61.9 | 539                | 66.4 | 2009              | 60.9 |
|                           | $\chi^2=25.8, p=0.01$       |                   |      |                    |      |                    |      |                    |      |                   |      |
|                           | Slight anxiety/depression   | 244               | 28.8 | 195                | 23.4 | 196                | 24.3 | 171                | 21.1 | 806               | 24.4 |
|                           | Moderate anxiety/depression | 88                | 10.4 | 86                 | 10.3 | 68                 | 8.4  | 73                 | 9.0  | 315               | 9.5  |
|                           | Severe anxiety/depression   | 20                | 2.4  | 13                 | 1.5  | 13                 | 1.6  | 10                 | 1.2  | 56                | 1.7  |
|                           | Extreme anxiety/depression  | 6                 | 0.7  | 8                  | 1.0  | 6                  | 0.7  | 6                  | 0.7  | 26                | 0.8  |
|                           | Missing                     | 24                | 2.8  | 27                 | 3.2  | 24                 | 3.0  | 13                 | 1.6  | 88                | 2.7  |

Supplementary Table 3. EQ5D outcome category by the number of Long Term Conditions (LTC) in patients in remission

| EQ5D Categories | High QoL (Scores=1) |      | Medium QoL (0.5≤Scores<1) |      | Low QoL (Scores<0.5) |      | Missing |     | Total |
|-----------------|---------------------|------|---------------------------|------|----------------------|------|---------|-----|-------|
|                 | n                   | %    | n                         | %    | n                    | %    | n       | %   |       |
| No LTC          | 436                 | 51.4 | 376                       | 44.3 | 18                   | 2.1  | 18      | 2.1 | 848   |
| 1 LTC           | 250                 | 36.2 | 378                       | 54.7 | 40                   | 5.8  | 23      | 3.3 | 691   |
| ≥2 LTC          | 129                 | 18.8 | 419                       | 60.9 | 119                  | 17.3 | 21      | 3.1 | 688   |
| Total           | 815                 | 36.6 | 1,173                     | 52.7 | 177                  | 7.9  | 62      | 2.8 | 2,227 |

Supplementary Table 4. EQ5D outcome category by the number of Long Term Conditions (LTC) in patients not in remission

| EQ5D Categories | High QoL (Scores=1) |      | Medium QoL (0.5≤Scores<1) |      | Low QoL (Scores<0.5) |      | Missing |     | Total |
|-----------------|---------------------|------|---------------------------|------|----------------------|------|---------|-----|-------|
|                 | n                   | %    | n                         | %    | n                    | %    | n       | %   |       |
| No LTC          | 79                  | 33.9 | 130                       | 55.8 | 15                   | 6.4  | 9       | 3.9 | 233   |
| 1 LTC           | 64                  | 23.1 | 175                       | 63.2 | 25                   | 9.0  | 13      | 4.7 | 277   |
| ≥2 LTC          | 37                  | 11.9 | 166                       | 53.2 | 94                   | 30.1 | 15      | 4.8 | 312   |
| Total           | 180                 | 21.9 | 471                       | 57.3 | 134                  | 16.3 | 37      | 4.5 | 822   |

Supplementary Table 5. Fear of Dying and Recurrence of Disease by Time since Diagnosis

| Fear of Dying      | Yes%  |      | No    |      | Missing |     | Total |
|--------------------|-------|------|-------|------|---------|-----|-------|
|                    | n     | %    | n     | %    | n       | %   |       |
| 1 year ago         | 256   | 30.2 | 542   | 63.9 | 50      | 5.9 | 848   |
| 2 years ago        | 233   | 27.9 | 543   | 65.1 | 58      | 7.0 | 834   |
| 3 years ago        | 214   | 26.6 | 531   | 65.9 | 61      | 7.6 | 806   |
| 5 years ago        | 180   | 22.2 | 583   | 71.8 | 49      | 6.0 | 812   |
| Total              | 883   | 26.8 | 2,199 | 66.6 | 218     | 6.6 | 3,300 |
| Fear of Recurrence | n     | %    | n     | %    | n       | %   |       |
| 1 year ago         | 437   | 51.5 | 369   | 43.5 | 42      | 5.0 | 848   |
| 2 years ago        | 403   | 48.3 | 398   | 47.7 | 33      | 4.0 | 834   |
| 3 years ago        | 376   | 46.7 | 384   | 47.6 | 46      | 5.7 | 806   |
| 5 years ago        | 345   | 42.5 | 427   | 52.6 | 40      | 4.9 | 812   |
| Total              | 1,561 | 47.3 | 1,578 | 47.8 | 161     | 4.9 | 3,300 |

1  
2  
3  
4  
5  
6  
7  
8  
9  
10  
11  
12  
13  
14  
15  
16  
17  
18  
19  
20  
21  
22  
23  
24  
25  
26  
27  
28  
29  
30  
31  
32  
33  
34  
35  
36  
37  
38  
39  
40  
41  
42  
43  
44  
45  
46  
47  
48  
49

Supplementary Figure 1. Distribution of EQ5D summary scores by cancer sub-type

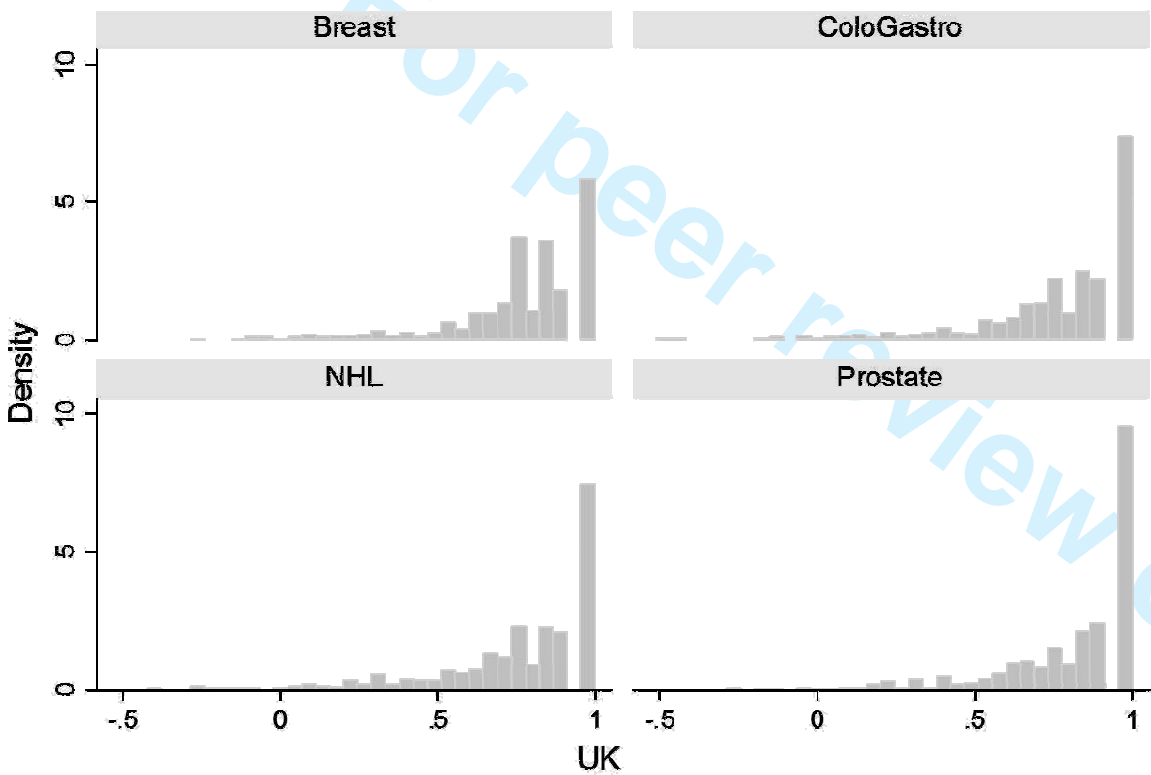

Graphs by tumour group

## References

1. Maddams J, Brewster D, Gavin A, Steward J, Elliott J, Utley M, et al. Cancer prevalence in the United Kingdom: estimates for 2008. *British Journal of Cancer* 2009;101(3):541-47.
2. Elliott J, Fallows A, Staetsky L, Smith PWF, Foster CL, Maher EJ, et al. The health and well-being of cancer survivors in the UK: findings from a population-based survey. *British Journal of Cancer* 2011;105:S11-S20.
3. Lipscomb J, Gotay CC, Snyder CE. Patient-reported outcomes in cancer: A review of recent research and policy initiatives. *Cancer Journal for Clinicians* 2007;57(5):278-300.
4. Richards M, Corner J, Maher J. The National Cancer Survivorship Initiative: new and emerging evidence on the ongoing needs of cancer survivors. *British Journal of Cancer* 2011;105:S1-S4.
5. Garcia SF, Cella D, Clauser SB, Flynn KE, Lad T, Lai J-S, et al. Standardizing patient-reported outcomes assessment in cancer clinical trials: A patient-reported outcomes measurement information system initiative. *Journal of Clinical Oncology* 2007;25(32):5106-12.
6. Bode RK, Hahn EA, DeVellis R, Cella D, Patient-Reported Outcomes M. Measuring Participation: The Patient-Reported Outcomes Measurement Information System Experience. *Archives of Physical Medicine and Rehabilitation* 2010;91(9):S60-S65.
7. van de Poll-Franse LV, Horevoorts N, van Eenbergen M, Denollet J, Roukema JA, Aaronson NK, et al. The Patient Reported Outcomes Following Initial treatment and Long term Evaluation of Survivorship registry: Scope, rationale and design of an infrastructure for the study of physical and psychosocial outcomes in cancer survivorship cohorts. *European Journal of Cancer* 2011;47(14):2188-94.
8. Den Oudsten BL, Traa MJ, Thong MSY, Martijn H, De Hingh IHJT, Bosscha K, et al. Higher prevalence of sexual dysfunction in colon and rectal cancer survivors compared with the normative population: A population-based study. *European Journal of Cancer* 2012; [48\(17\):3161-70](#)<sup>In Press</sup>.
9. Hoffman RM, Hunt WC, Gilliland FD, Stephenson RA, Potosky AL. Patient satisfaction with treatment decisions for clinically localized prostate carcinoma. Results from the prostate cancer outcomes study. *Cancer* 2003;97(7):1653-62.
10. Potosky AL, Davis WW, Hoffman RM, Stanford JL, Stephenson RA, Penson DF, et al. Five-year outcomes after prostatectomy or radiotherapy for prostate cancer: The prostate cancer outcomes study. *Journal of the National Cancer Institute* 2004;96(18):1358-67.
11. Ayanian JZ, Zaslavsky AM, Arora NK, Kahn KL, Malin JL, Ganz PA, et al. Patients' Experiences With Care for Lung Cancer and Colorectal Cancer: Findings From the Cancer Care Outcomes Research and Surveillance Consortium. *Journal of Clinical Oncology* 2010;28(27):4154-61.
12. Department of Health. National Cancer Patient Experience Survey Programme - 2010 National Survey Report, 2010.
13. Davies N, Gibbons E, Mackintosh A, Fitzpatrick R. A Structured Review of Patient Reported Outcomes Measures (PROMS) for Breast Cancer, Report to the

- Department of Health. In: Patient Reported Outcomes Measurement Group, editor. Oxford, 2009.
14. Morris C, Gibbons E, Fitzpatrick R. A Structured Review of Patient Reported Outcome Measures (PROMS) for Prostate Cancer, Report to the Department of Health. In: Patient-Reported Outcomes Measurement Group, editor. Oxford, 2009.
  15. Hadi M, Gibbons E, Fitzpatrick R. A Structured Review of Patient Reported Outcome Measures (PROMS) for Colorectal Cancer, Report to the Department of Health. In: Group PROM, editor. Oxford, 2009.
  16. ~~The~~ Department of Health. [Start Active, Stay Active: A report on physical activity from the four home countries' Chief Medical Officers](#)[UK Physical Activity Guidelines, London, 2011.](#)
  17. The EuroQol Group. EuroQol-a new facility for the measurement of health-related quality of life. *Health Policy* 1990;16(3):199-208.
  18. Herdman M, Gudex C, Lloyd A, Janssen M, Kind P, Parkin D, et al. Development and preliminary testing of the new five-level version of EQ-5D (EQ-5D-5L). *Quality of Life Research* 2011;20:1727-36.
  19. Wright EP, Kiely M, Johnston C, Smith AB, Cull A, Selby PJ. Development and evaluation of an instrument to assess social difficulties in routine oncology practice. *Quality of Life Research* 2005;14(2):373-86.
  20. Wright P, Smith A, Brown S, Brown J, Roberts K. Measuring social difficulties: Clinical meaning and utility of the Social Difficulties Inventory (SDI). *Psycho-Oncology* 2006;15(2):S436-S37.
  21. Wright P, Smith AB, Keding A, Velikova G. The Social Difficulties Inventory (SDI): development of subscales and scoring guidance for staff. *Psycho-Oncology* 2011;20(1):36-43.
  22. Sheldon H, Sizmur S. An evaluation of the National Cancer Survivorship Initiative test community projects: Picker Institute Europe, 2010.
  23. Girgis A, Lambert S, Lecathelinais C. The supportive care needs survey for partners and caregivers of cancer survivors: development and psychometric evaluation. *Psycho-Oncology* 2011;20(4):387-93.
  24. Ashley L, Jones H, Thomas J, Forman D, Newsham A, Morris E, et al. Integrating cancer survivors' experiences into UK cancer registries: design and development of the ePOCS system (electronic Patient-reported Outcomes from Cancer Survivors). *British Journal of Cancer* 2011;105:S74-S81.
  25. [Webster K, Cella D, Yost K. The Functional Assessment of Chronic Illness Therapy \(FACIT\) Measurement System: properties, applications, and interpretation. Health and Quality of Life Outcomes. 2003;1:79.](#)~~FACIT. Functional Assessment of Chronic Illness Therapy.~~
  26. Department for Communities and Local Government. English Indices of Multiple Deprivation 2010: Crown copyright, 2011.
  27. [van Hout B, Janssen MF, Feng Y-S, Kohlmann T, Busschbach J, Golicki D, Lloyd A, Scalone L, Kind P, Pickard AS. Interim Scoring for the EQ-5D-5L: Mapping the EQ-5D-5L to EQ-5D-3L Value Sets. Value in Health 2012;15:708-715.](#)~~The EUROQOL Group. Interim Scoring for the EQ-5D-5L: Mapping the EQ-5D-5L to EQ-5D-3L VALUE SETS, 2011.~~
  28. Judd CM, McLelland GH, Ryan CS. *Data Analysis: A Model Comparison Approach*. Second ed: Routledge, 2008.
  29. National [Research Ethics Service](#)~~Patient Safety Agency~~. [Differentiating audit, service evaluation and research version 1.1](#)~~Defining research—guidance from NRES, 2010~~.

1  
2  
3  
4  
5  
6  
7 Available via

8 <http://www.nres.nhs.uk/EasysiteWeb/getresource.axd?AssetID=340&type=full&servicetype=Attachment>; last accessed 22 January 2013.

- 9  
10 30. Ganz PA, Land SR, Antonio C, Zheng P, Yothers G, Petersen L, et al. Cancer survivorship  
11 research: the challenge of recruiting adult long term cancer survivors from a  
12 cooperative clinical trials group. *Journal of Cancer Survivorship-Research and Practice*  
13 2009;3(3):137-47.
- 14 31. Moller H, Richards S, Hanchett N, Riaz SP, Luechtenborg M, Holmberg L, et al.  
15 Completeness of case ascertainment and survival time error in English cancer  
16 registries: impact on 1-year survival estimates. *British Journal of Cancer*  
17 2011;105(1):170-76.
- 18 32. King MT, Viney R, Smith DP, Hossain I, Street D, Savage E, et al. Survival gains needed to  
19 offset persistent adverse treatment effects in localised prostate cancer. *British*  
20 *Journal of Cancer* 2012;106(4):638-45.
- 21 33. Markland AD, Goode PS, Redden DT, Borrud LG, Burgio KL. Prevalence of Urinary  
22 Incontinence in Men: Results From the National Health and Nutrition Examination  
23 Survey. *Journal of Urology* 2010;184(3):1022-27.
- 24 34. [Craig R, Mindell J, Hirani V, editors. Health Survey for England 2008. London: National](#)  
25 [Centre of Social Research; 2009. \(Series HS no. 18\). The Health and Social Care](#)  
26 [Information Centre. The Health Survey for England 2008. In: Craig R, editor, 2009.](#)
- 27 35. ~~The~~ Department of Health. The GP Patient Survey, 2012. Available via [http://www.gp-](http://www.gp-patient.co.uk/results)  
28 [patient.co.uk/results](http://www.gp-patient.co.uk/results); last accessed 22 January 2013.
- 29 36. Eakin EG, Youlden DR, Baade PD, Lawler SP, Reeves MM, Heyworth JS, et al. Health  
30 status of long-term cancer survivors: Results from an Australian population-based  
31 sample. *Cancer Epidemiology Biomarkers & Prevention* 2006;15(10):1969-76.
- 32 37. Kenfield SA, Stampfer MJ, Giovannucci E, Chan JM. Physical Activity and Survival After  
33 Prostate Cancer Diagnosis in the Health Professionals Follow-Up Study. *Journal of*  
34 *Clinical Oncology* 2011;29(6):726-32.
- 35 38. Barbieri JM, Greenberg DC, Wright KA, Brown CH, Palmer C, Neal DE, et al. The  
36 association of diagnosis in the private or NHS sector on prostate cancer stage and  
37 treatment. *Journal of Public Health* 2012;34(1):108-14.
- 38 39. ~~The~~ Department of Health. NHS Outcomes Framework 2012-13, 2011. Available via  
39 [https://www.wp.dh.gov.uk/publications/files/2012/11/121109-NHS-Outcomes-](https://www.wp.dh.gov.uk/publications/files/2012/11/121109-NHS-Outcomes-Framework-2013-14.pdf)  
40 [Framework-2013-14.pdf](https://www.wp.dh.gov.uk/publications/files/2012/11/121109-NHS-Outcomes-Framework-2013-14.pdf); last accessed 22 January 2013.
- 41  
42  
43  
44  
45  
46  
47  
48  
49  
50  
51  
52  
53  
54  
55



1  
2  
3 4 February 2013  
4

5 Dear Mr Sands and Colleagues,  
6

7  
8 We are grateful for the opportunity to make revisions to the submitted  
9 manuscript. We have made a number of changes to the manuscript that we  
10 feel significantly enhance its quality. One or two of the very helpful reviewer's  
11 comments have not led to changes in the manuscript and we have  
12 commented as to why we have not felt changes necessary.  
13

14  
15 To aid interpretation of changes, I have copied the reviewers' comments  
16 below and provided responses in CAPITALS in the appropriate sections of  
17 these.  
18

19  
20 Please do not hesitate to contact me if further clarification is required or if you  
21 would suggest further amendments.  
22

23 Yours sincerely,

24  
25 ADAM GLASER  
26  
27

28  
29 Reviewer(s) Reports:

30  
31 Reviewer: Simon N Rogers  
32 Professor, EPRC, Edge Hill University and Consultant Oral and Maxillofacial  
33 Surgeon, Aintree University Hospital, UK  
34 I have no competing interests.  
35

36 This is a very well undertaken and presented piece of clinical outcomes  
37 research. PROMS in cancer is very important.  
38 The study comprises of a very large cohort albeit restricted to breast,  
39 colorectal, prostate and non-hodgkins. It is not clear why these four were  
40 selected. Was it because they are common forms of cancer or was there an  
41 expected theoretical expected difference of outcome based on patient and  
42 clinical characteristics? THESE WERE CHOSEN AS THEY ARE COMMON  
43 AND THERE ARE LARGE NUMBERS LIVING BEYOND CANCER  
44 TREATMENT.  
45  
46 Allowing comparison to Health Survey (2008) and General Practice Survey  
47 adds value to the study as does the other facets such as the relationship with  
48 the presence of one or more long-term condition. Cancer patients surviving  
49 into older age will have other comorbidities that impact on their Patient Report  
50 Outcome yet are not directly related to their cancer. It can be hard to tease  
51 this out and apportion weighting.  
52  
53 There is an acceptable response rate for the cross-sectional survey (66%).  
54 Though two reminders were sent to non-responders. There is a cost  
55 associated with this. Also confirmation that the patient is alive as sending a  
56 questionnaire to a dead patient can cause considerable family distress.  
57  
58  
59  
60

1  
2  
3 The PROMs used are appropriate. There are various measures such as EQ-  
4 5D, FACT (cancer specific), Social Difficulties Inventory (SDI), Experience of  
5 care etc . The data tends to focus on the EQ-5D.

6 It is not clear which questionnaire was used to assess the fear of recurrence  
7 and dying. Also is this something that is expected to be common following  
8 cancer, however the severity of this concern might be low. Perhaps more  
9 mention around recurrence fears is appropriate given that 47% reported fear  
10 of recurrence. In many ways it is a natural and healthy reaction to having  
11 cancer. The fact that a quarter had fear of dying again might be reasonable  
12 and needs to be compared to normative data. THESE ITEMS WERE MADE  
13 UP BY THE PROJECT TEAM AND THEN COGNITIVIELY TESTED PRIOR  
14 TO THIS PILOT. WE HAVE ADDED DETAIL TO PAGE 8.

15 Deprivation influenced response rate and outcome. This is a challenge when  
16 trying to assess PRO in the more vulnerable groups of society. What solutions  
17 are there to attempt to address this? IT IS VERY HARD TO SELECT  
18 POPULATIONS WITHOUT SKEWING THE DATA. HOWEVER, WITH  
19 ROLL-OUT OF THE PILOT TO LARGE COHORTS WE WILL PERFORM  
20 ANALYSES AND INTERPRETATION WITH SENSITIVITY TO THESE  
21 ISSUES. WE PROPOSE NATIONAL ROLL-OUT AND SO WILL CAPTURE  
22 AS MANY PATIENTS AS POSSIBLE . SECTION ADDED TO "STUDY  
23 LIMITATIONS" IN DISCUSSION, P19.

24 Very good presentation of data – the detail in the tables is to be commended.  
25 The study has two aims. Firstly to determine feasibility of PROM in assessing  
26 QOL. This is already well established and this study tests a limited aspect of  
27 ‘feasibility’. Linking to this the authors’ second aim is to inform the  
28 development of a national PROMS programme for cancer. It is unclear how  
29 this study does that.

30 There are issues around the conclusion of this study. Questionnaires are  
31 already acknowledged as feasible and acceptable to most survivors. There  
32 are significant challenges to routinely collecting PROMS. THE PILOT STUDY  
33 WAS PERFORMED TO DETERMINE THE FEASIBILITY AND  
34 ACCEPTABILITY OF THE DESCRIBED APPROACH TO IDENTIFY  
35 PARTICIPANTS AND THEN CONTACT THEM AT THESE TIME-POINTS BY  
36 MAIL WITHOUT INTRODUCTION DIRECTLY BY A CLINICIAN OR  
37 RESEARCHER KNOWN TO THEM. THERE IS NO LITERATURE TO  
38 SUPPORT THIS METHODOLOGICAL DESIGN OF POPULATION-BASED  
39 PROMS DATA COLLECTION. WE HAVE ADDED CLARIFICATION TO THE  
40 OBJECTIVES ON P6 AND IN THE ABSTRACT. Most HRQOL questionnaires  
41 have limited utility in the identification of specific needs as they are limited by  
42 the questionnaire items themselves, range, wording, scoring. Comparing  
43 HRQOL across service provides as an outcome is not without it problems  
44 based on patients priorities in cancer, response shift, adaptation, limitations  
45 inherent in HRQOL questionnaires, confounding variables.

46 The key messages are weak – they are already well appreciated (first two  
47 appoints) or ill-advised (third point). HRQOL measures as used in this study  
48 are likely to fail to give clinically meaningful health economics comparison  
49 across provides and fail to really facilitate service provision across the diverse  
50 needs at cancer patients have. WE RECOGNISE THAT THE OVERALL  
51 SAMPLE REPORTED IS LARGE. HOWEVER, WHEN BROKEN DOWN BY  
52 THE DISEASE GROUPS AND TIMES FROM DIAGNOSIS IT IS SMALL.

1  
2  
3 HENCE, WE FELT UNABLE TO MAKE DETAILED CLAIMS REGARDING  
4 THE QUALITY OF OUTCOMES NOR WERE WE KEEN TO OVER-  
5 INTERPRET FINDINGS OTHER THAN GIVE A FEEL FOR WHAT WILL BE  
6 ACHIEVABLE THROUGH A NATIONAL ROLL-OUT OF THE  
7 METHODOLOGY/PROGRAMME. WE ARE CURRENTLY COLLECTING  
8 DATA ON 35,000 INDIVIDUALS WITH COLORECTAL CANCER AND THIS  
9 EXPANDED DATA-SET WILL ALLOW US TO ANSWER THE IMPORTANT  
10 POINTS RAISED BY THE REVIEWER. CHANGES TO THE ABSTRACT,  
11 DISCUSSION AND CONCLUSIONS HAVE BEN MADE TO EXPLAIN THESE  
12 POINTS.  
13

14  
15  
16 Reviewer: A/Prof Michael Jefford  
17 Consultant Medical Oncologist  
18 Australian Cancer Survivorship Centre, A Richard Pratt Legacy  
19 Peter MacCallum Cancer Centre  
20 Melbourne, Victoria, Australia  
21

22  
23 I recently authored a paper with Glaser, Richards  
24 I spent part of my sabbatical in 2011 working with Glaser, Richards and briefly  
25 Hartwell, Corner  
26

27  
28 This is an important, interesting paper describing the largest population-based  
29 evaluation of European cancer survivors' PROs  
30

31 It confirms the feasibility of collecting data in this manner and provides useful  
32 baseline data  
33

34 One aspect that should be mentioned is that we don't know how many people  
35 are disease-free and how many are living with advanced cancer. It's worth  
36 stating this. Some studies have included 'survivors' who are cancer-free,  
37 making comparisons with this study somewhat problematic. The authors  
38 might consider describing QoL for people who are apparently disease-free  
39 and for those who report that they are living with cancer THESE ARE  
40 IMPORTANT POINTS. WE HAVE ADDED COMMENTS TO P10 AND P19  
41 IN THE "STUDY LIMITATIONS". THE NUMBERS IN THE SAMPLES  
42 PREVENT IN-DEPTH ANALYSIS OF DISEASE-FREE VERSUS THOSE  
43 WITH ACTIVE DISEASE.  
44

45  
46 The paper is strong, but could be improved by considering aspects below  
47  
48

#### 49 Abstract

50 - Objectives do not really reflect the results. Surely the objectives include  
51 a desire to describe PROs, determine predictors of QoL, as well as look at  
52 feasibility, etc THE STUDY WAS DONE PURELY AS A FEASIBILITY STUDY  
53 PRIOR TO THE MAJOR INVESTMENT OF A NATIONAL STUDY. AGAIN,  
54 THE NUMBERS ARE TOO SMALL FOR DETAILED ANALYSIS AND WE  
55 WERE CAUTIOUS OF OVER INTERPRETATION IN DESCRIBING PROs,  
56  
57  
58  
59  
60

1  
2  
3 IDENTIFYING PREDICTIVE FACTORS FOR OUTCOMES ETC. WE HAVE  
4 ADJUSTED THE WORDING OF THE OBJECTIVES INT HE ABSTRACT.

5 - Results – ‘QoL scores were stable over time’ – careful, as people were  
6 not followed longitudinally. WE HAVE ADJUSTED THE WORDING OF THE  
7 RESULTS SECTION OF THE ABSTRACT.  
8

#### 9 Article summary

10 - Article focus - “to inform the development of a national PROMS  
11 programme for cancer” – this is not really discussed in the paper (but probably  
12 should be)

13 - Strengths and limitations – 4th bullet (face and content validity) –  
14 questionnaires were not reviewed by consumers (patients, survivors) so I  
15 don’t know whether this is a strength or a weakness THE QUESTIONNAIRES  
16 WERE REVIEWED BY CONSUMERS IN A PROCESS OF COGNITIVE  
17 TESTING AND THROUGH INVOLVEMENT OF ESTABLISHED NATIONAL  
18 ADVISORY GROUPS AND CONSULTATION WITH MAJOR CANCER  
19 CHARITIES. COGNITIVE TESTING DESCRIBED P9..  
20  
21  
22

#### 23 Introduction

24 - final paragraph – ‘determine the feasibility of routinely collecting’ –  
25 consider adding the ‘how’ here – perhaps “by considering response rate,  
26 completion, participant complaints” WE HAVE MODIFIED THE FINAL  
27 PARAGRAPH OF THE INTRODUCTION.

28 - same paragraph – add extra goals – to report QoL and describe  
29 associations between QoL and other disease / patient factors WE HAVE  
30 TRIED TO STEER CLEAR OF THIS AS WE KNEW THE SAMPLE SIZES  
31 WOULD BE SMALL AND WE WILL HAVE MORE RELIABLE AND  
32 INTERPREATBLE DATA FORM THE NATIONAL ROLL-OUT OF THE  
33 PROGRAMME.  
34

#### 35 Methods, study design

36 - why 1, 2, 3, 5 years? Why not 1, 3, 5, 8 (as an example)? There seems  
37 a lot of sampling 1 YEAR WAS CHOSEN AS A BASELINE WHEN IT WAS  
38 FELT THE VAST MAJORITY WOULD HAVE COMPLETED PRIMARY  
39 CANCER THERAPY (PRO DATA IS COLLECTED BY NATIONAL CANCER  
40 PATIENT EXPERIENCE PROGRAMME WITHIN THE FIRST YEAR FROM  
41 DIAGNOSIS IN ENGLAND). 2 YEARS REFLECTS THE RE-ADJUSTMENT  
42 PERIOD AND 3 AND 5 YEARS WERE ARBITARILY CHOSEN TO EXAMINE  
43 THE DEVELOPMENTAL TRAJECTORY OF MORBIDITY BURDEN.  
44

45 - add the ‘<5%’ line from the discussion in here in reference to private  
46 centres.  
47  
48

#### 49 Methods, cohort identification

50 - ‘covered 70 of 160 (43%) acute NHS Trusts’ – are these typical of all  
51 NHS Trusts? THERE IS NO WAY OF KNOWING THIS, BUT WE HAVE NO  
52 REASON TO SUSPECT THEY ARE NOT "TYPICAL".

53 - Explain ‘Demographic Batch Service’ REMOVED THE TERM AND  
54 ADJUSTED EXPLANATION OF DEATH CHECKS.

55 - ‘a dedicated freephone telephone helpline’ – add what the purpose of  
56 this was. Was it for assistance / to make a complaint? Were people  
57  
58  
59  
60

adequately advised of the purpose of the service? CLARIFICATION HAS BEEN ADDED TO P8.

Methods, questionnaire design and content

- add more about development – the process of consultation with patient groups, etc FURTHER EXPLANATION HAS BEEN ADDED ON 8 AND P9.

- briefly describe the rationale for including each of the measures, eg why ask about exercise? (but not about smoking, drinking, etc) THESE ARE DESCRIBED IN MORE DETAIL IN THE REFERENCED DEPARTMENT OF HEALTH REPORT. WE INCLUDED PHYSICAL ACTIVITY AS IT IS EMERGING AS A KEY FACTOR IN OUTCOMES. ITEM SELECTION WAS PERFORMED FOLLOWING LITERATURE REVIEW AND SIGNIFICANTLY INFORMED BY REPORTS FOR THE DEPARTMENT OF HEALTH BY PROF RAY FITZPATRICK(OXFORD) PLUS CONSULTATION WITH EXPERT CLINICAL ADVISORY PANELS.

- comment on readability of the final questionnaires – the front page of the survey looks like it would frighten off people with health literacy difficulties

- generic content – describe the validity of 'self-reported response to treatment and disease status' and also reporting of long-term conditions ADDED COMMENTS TO "STUDY LIMITATIONS" IN DISCUSSION.

- describe the 'experience of care' survey ADDED SENTENCE TO P8

- how was fear of recurrence and fear of death assessed (ie what tools) – this is important as there are many instruments available

- have all the data from the measures been reported? If not, why not? NO THEY HAVE NOT, WE HAVE BEEN SELECTIVE AS THERE WAS TOO MUCH INFORMATION FOR ONE MANUSCRIPT. A COMPREHENSIVE REPORT HAS BEEN COMPILED AND IS NOW REFERENCED IN THE DISCUSSION, P20.

- FACT measures are really intended for use around treatment. This needs to be acknowledged (i.e they're not really 'survivorship' measures) THIS IS NOW DISCUSSED ON P20.

- cognitive testing – was there pretesting to determine that people understood and answered correctly?

- Why were the questions on feeling like a man (prostate ca) or a woman (breast ca) omitted? ACTION TAKEN AS THESE QUESTIONS WERE FOUND TO BE CONFUSING AND UNACCEPTABLE TO THOSE PATIENTS/SURVIVORS PARTICIPATING IN THE COGNITIVE TESTING EXERCISE.

Methods, data analysis

- is the categorization of QoL into high, medium, low a standard procedure? If so, reference it. If not, explain this A SECTION HAS BEEN ADDED TO THE "STUDY LIMITATIONS" IN THE DISCUSSION.

Results

- response rates - no difference in RR by sex – this data is not shown THE FULL RESULTS ARE IN THE PREVIOUSLY MENTIONED AND REFERENCED DEPARTMENT OF HEALTH REPORT.

- demographics of respondents – breast ca respondents similar age profile to incident cases – seems odd as you might expect that people would



1  
2  
3 be 1, 2, 3, 5 years older than incident cases. Add whether other cancer types  
4 are reflective of the age expected in the population THIS STATEMENT HAS  
5 BEEN REMOVED AS THE RESPONDERS' DATA PRESENTED IN TABLE  
6 1b IS NOT SIMULTANEOUSLY STRATIFIED BY AGE AND TIME FROM  
7 DIAGNOSIS.

8  
9 - missing data – ‘no evidence ... missing data was related to the order of  
10 the questions’ – was different order tried? Or do you mean that missing data  
11 was no more common at the end c/w earlier questions? THIS HAS BEEN  
12 AMENDED IN THE MANUSCRIPT.

13 - Generic PROMS – worth adding in the data for “percentage reporting  
14 anxiety or depression symptoms decreased significantly” as this is likely to be  
15 of interest. Adding comparisons to the general population (or mentioning in  
16 the discussion) would be interesting AGREE, BUT THIS IS IN THE FULL  
17 REFERENCED REPORT AND SPACE CONSTRAINTS PREVENTED  
18 INCLUSION.

19  
20 - Breast cancer (page 13, lines 28-30) “Increasing age ... better  
21 outcomes in EQ5D” – not really, as 85+ have an OR of 1.61 THE SENTENCE  
22 HAS BEEN AMENDED TO CLARIFY THE STATEMENT.

23 - Colorectal cancer (lines 54, 55) – regarding the comment ‘whilst  
24 undergoing treatment’ – people undergoing treatment are likely those with  
25 advanced or recurrent cancer. Has this been examined? Worth mentioning  
26 when describing the initial study sample DISCUSSION ADDED TO "STUDY  
27 LIMITATIONS".

28  
29 - NHL, page 14, line 49 – “QoL seemed to improve with time from  
30 diagnosis” – qualify this to say that they are not the same patients who have  
31 been followed longitudinally DISCUSSION ADDED TO "STUDY  
32 LIMITATIONS" AND "WHERE NEXT FOR CANCER PROMs IN ENGLAND".

33 - CRC and prostate ca (page 14, lines 15-21 and page 15, lines 19-28) –  
34 this seems like quite selective reporting from the disease-specific FACT  
35 measures. Consider how to present this data more completely (for all cancer  
36 types) AGAIN, HIGHLIGHTED THAT FULL RESULTS ARE AVAILABLE IN  
37 THE DH REPORT.

38  
39 - Fear of recurrence and dying – this data is important and worth  
40 describing in more detail (perhaps not in a supplementary table). Also, include  
41 whether these fears are related to psychological morbidity / inferior QoL. WE  
42 ARE CAUTIOUS ABOUT OVER-INTERPRETATION OF THE DATA DUE TO  
43 SMALL SAMPLE SIZES. WE PLAN TO WAIT UPON THE DATA FROM THE  
44 NATIONAL ROLL-OUT.

#### 45 46 Discussion

47 - This generally lacks oomph, and restates the results a little too much.  
48 I'm still left with a feeling of ‘so what?’ and ‘so what now?’

49 - There is a major focus on the EQ5D and associations with inferior QoL.  
50 Other factors that might impact QoL were not recorded, eg ongoing physical  
51 symptoms, depression – explain why all factors known to impact QoL were  
52 not included

53  
54 - It would be useful to include consideration of (i) other large studies of  
55 cancer survivors (e.g. compare to reference #2 – what does this data add?),  
56 (ii) consideration of possible mechanisms – why / how do the significant  
57 factors (eg age, deprivation, LTC, disease status) impact on QoL? (iii)  
58  
59  
60

potential interventions based on the data, IN RESPONSE TO THE ABOVE 3 COMMENTS RELATING TO THE DISCUSSION: AS PREVIOUSLY STATED WE ARE CAUTIOUS ABOUT OVER-INTERPRETATION. CERTAIN CONFOUNDING FACTORS SUCH AS THOSE DESCRIBED ABOVE WERE NOT CONSIDERED DUE TO SMALL NUMBERS AND SOME OF THESE ARE LIKELY TO BE HIGHLY CORRELATED WITH FACTORS WE DID ADJUST FOR SUCH AS DEPRIVATION. HENCE, INCLUDING ALL POSSIBLE "CONFOUNDERS" WOULD LEAD TO BIAS.

(iv) future steps – will the survey be repeated? Why / when? agree, SECTION ADDED TO "WHERE NEXT FOR CANCER PROMS IN ENGLAND" IN DISCUSSION -OUTLINES THE PROPOSED AND, IN PLACE, NATIONAL ROLL-OUT.

- There should also be discussion of the possibility that treatments have changed over the 1-5 years and thus results might reflect treatment changes / change in practice agree agree, ADDED TO "STUDY LIMITATIONS" AND DISCUSSION.

- Comparison with the general population – odd to include a new table in the discussion – consider summarizing and moving to the results section. In this comparison, please justify the comparison – were the same QoL measures used? If not, how can data be compared? THIS WAS ADDED TO GIVE A "FLAVOUR" OF WHAT COULD BE ACHIEVED WHEN ALL DATA FROM NATIONAL ROLL-OUT BECOMES AVAILABLE. WE ARE NOT KEN ON MOVING THIS TO THE RESULTS DUE TO RISK OF OVER-INTERPRETATION.

- Limitations – more needs to be said about the validity of self-report, use of measures that were not designed for a survivor population, effect of patient deaths, changes in treatments / treatment practices, missing data, etc agree, SECTION ADDED TO "STUDY LIMITATIONS" IN DISCUSSION.

- Where next for cancer PROMs in England? – NHS Outcomes Framework needs description – unlikely to be understood by non-UK readers (whereas the paper will be of broad international interest) SEE COMMENT ABOVE AND EXPANSION OF THIS SECTION IN MANUSCRIPT.

- Worth discussing how to get to elderly / low SES – probably some discussion of health literacy goes here

- Page 17, lines 38-42 “the core components ... had been identified ... as being reliable and appropriate” – add more detail here. Is there really evidence that these measures work well for the elderly / low SES? SEE STUDY LIMITATIONS.

- Page 20, lines 7/8 “...and are cost effective” – no data is shown to justify this REMOVED.

- Page 20, lines 8-12 “...insights into where improvement efforts should be targeted to reduce the long-term burden of cancer and its treatments on the growing number of cancer survivors” – can you give some suggestions? WE ARE WAITING FOR THE RESULTS FROM THE NATIONAL ROLL-OUT.

- Final paragraph lacks impact

Table 1a

1  
2  
3 - suggest a solid vertical line to separate the 2 right columns as the %s  
4 work differently to the responders / non-responders columns (it's a bit  
5 confusing) CHANGED  
6

7  
8 Table 3a-c

9 - explain 'physical activity' as it's not clear that this refers to increased  
10 activity CHANGED  
11

12 References

13 - several are incomplete, eg 16, 25 NOW COMPLETE  
14  
15  
16  
17  
18  
19  
20  
21  
22  
23  
24  
25  
26  
27  
28  
29  
30  
31  
32  
33  
34  
35  
36  
37  
38  
39  
40  
41  
42  
43  
44  
45  
46  
47  
48  
49  
50  
51  
52  
53  
54  
55  
56  
57  
58  
59  
60



1  
2  
3  
4  
5  
6  
7  
8  
9  
10  
11  
12  
13  
14  
15  
16  
17  
18  
19  
20  
21  
22  
23  
24  
25  
26  
27  
28  
29  
30  
31  
32  
33  
34  
35  
36  
37  
38  
39  
40  
41  
42  
43  
44  
45  
46  
47  
48  
49  
50  
51  
52  
53  
54  
55  
56  
57  
58  
59  
60

**Supplementary File 1                      ICD10 Codes included in the Study**

Breast Cancer                              ICD10 Codes C50 & D05

Colorectal/Lower G.I.                      ICD10 Codes C18, C19, C20, and C21

Non-Hodgkin's Lymphoma                      ICD10 Codes C82, C83, C84 & C85

Prostate                                      ICD10 Code C61

For peer review only

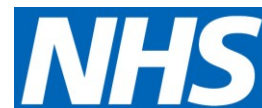

## Living with and beyond Breast Cancer

This questionnaire is about your health and quality of life since being diagnosed with your cancer. Its purpose is to provide information which can help the NHS monitor and improve the quality of health services for future patients.

### Who should complete the questionnaire?

The questions should be answered by the person named in the letter enclosed with this questionnaire. If that person needs help to complete the questionnaire, the answers should be given from their point of view – not the point of view of the person who is helping.

### Completing the questionnaire

For each question please tick clearly inside the box that is closest to your views using a black or blue pen. Don't worry if you make a mistake; simply cross out the mistake and put a tick in the correct box. Please **do not** write your name or address anywhere on the questionnaire.

### IMPORTANT INFORMATION

To make sure the information we collect is useful, we need to collect some personal details from you and to access information held about you in other NHS databases. The purpose of collecting this information is to generate aggregated statistics about the quality of life for people who are living with and beyond cancer. These statistics will be used to compare the differences in quality of life for people treated for different types of cancer by different providers and to understand what may be causing these. The results will be used to measure and improve the quality of healthcare services.

**By completing this questionnaire you are giving your consent for the information provided to be used for the above purposes. Specifically, you are agreeing that:**

- Your personal details and relevant health information can be held and used by an organisation contracted to the Department of Health to analyse the data
- Other information about you held by the Patient Demographics Service, the Secondary Users Service, Cancer Registries and other NHS databases can be held and used by an organisation contracted to the Department of Health to analyse the data
- Your personal details can be used to send you related follow-up questionnaires in the future

Your personal information will be handled securely and anonymised after analysis and before any publication.

Your personal information will not be released by the Department of Health or third party organisations working on its behalf unless required by law or where there is a clear overriding public interest.

You can withdraw the information you give the NHS in this questionnaire upon request, up to the point at which data are analysed and personal details removed.

If you have any queries about the questionnaire,  
please call the FREEPHONE helpline number on **0800 783 1775**

**Taking part in this survey is voluntary**  
**Published reports will not contain any personal details**

## YOUR HEALTH TODAY

*The questions in this section are all about your health and how you feel on the day you complete this questionnaire.*

1. What treatments have you received for your breast cancer? **(Tick all that apply)**

- 1  Radiotherapy
- 2  Chemotherapy (excluding hormone treatment)
- 3  Hormone treatment
- 4  Surgery

2. How long is it since you completed your **initial treatment** for breast cancer? *Treatment includes any chemotherapy, radiotherapy, or surgery for your breast cancer. When answering this question please do not include hormone treatments such as Tamoxifen.*

- 1  I am still having my initial treatment
- 2  It is less than 3 months since my initial treatment
- 3  It is between 3 and 12 months since my initial treatment
- 4  It is between 1 and 5 years since my initial treatment
- 5  It is more than 5 years since my initial treatment
- 6  Don't know / can't remember

3. How has your breast cancer responded to treatment?

- 1  My breast cancer has responded fully to treatment (I am in remission)
- 2  My breast cancer has been treated but is still present
- 3  My breast cancer has not been treated at all
- 4  My breast cancer has come back after it was originally treated
- 5  I am not certain what is happening with my breast cancer

4. If you have had breast surgery, do any of the following apply to you? **(Tick all that apply)**

- 1  I have had a lumpectomy
- 2  I have had a mastectomy
- 3  I have had breast reconstruction
- 4  I am awaiting or considering breast reconstruction
- 5  None of these apply to me

# YOUR HEALTH TODAY

Under each heading, please tick the ONE box that best describes your health TODAY.

## 5. MOBILITY

- I have no problems in walking about <sub>1</sub>
- I have slight problems in walking about <sub>2</sub>
- I have moderate problems in walking about <sub>3</sub>
- I have severe problems in walking about <sub>4</sub>
- I am unable to walk about <sub>5</sub>

## 6. SELF CARE

- I have no problems washing or dressing myself <sub>1</sub>
- I have slight problems washing or dressing myself <sub>2</sub>
- I have moderate problems washing or dressing myself <sub>3</sub>
- I have severe problems washing or dressing myself <sub>4</sub>
- I am unable to wash or dress myself <sub>5</sub>

## 7. USUAL ACTIVITIES (*work, study, housework, family or leisure activities*)

- I have no problems doing my usual activities <sub>1</sub>
- I have slight problems doing my usual activities <sub>2</sub>
- I have moderate problems doing my usual activities <sub>3</sub>
- I have severe problems doing my usual activities <sub>4</sub>
- I am unable to do my usual activities <sub>5</sub>

## 8. PAIN / DISCOMFORT

- I have no pain or discomfort <sub>1</sub>
- I have slight pain or discomfort <sub>2</sub>
- I have moderate pain or discomfort <sub>3</sub>
- I have severe pain or discomfort <sub>4</sub>
- I have extreme pain or discomfort <sub>5</sub>

## 9. ANXIETY / DEPRESSION

- I am not anxious or depressed <sub>1</sub>
- I am slightly anxious or depressed <sub>2</sub>
- I am moderately anxious or depressed <sub>3</sub>
- I am severely anxious or depressed <sub>4</sub>
- I am extremely anxious or depressed <sub>5</sub>

## YOUR HEALTH AND WELLBEING IN THE LAST 7 DAYS

*The questions in this section are about your health and how you have felt in the past 7 days.*

Please mark one box per line to give your response.

| <i>During the past 7 days:</i>                                                                                                                                                                                                                                                                                                                                | <b>Not at<br/>all</b>      | <b>A little<br/>bit</b>    | <b>Some-<br/>what</b>      | <b>Quite<br/>a bit</b>     | <b>Very<br/>much</b>       |                            |                            |                            |
|---------------------------------------------------------------------------------------------------------------------------------------------------------------------------------------------------------------------------------------------------------------------------------------------------------------------------------------------------------------|----------------------------|----------------------------|----------------------------|----------------------------|----------------------------|----------------------------|----------------------------|----------------------------|
| 10. I have been short of breath                                                                                                                                                                                                                                                                                                                               | 1 <input type="checkbox"/> | 2 <input type="checkbox"/> | 3 <input type="checkbox"/> | 4 <input type="checkbox"/> | 5 <input type="checkbox"/> |                            |                            |                            |
| 11. I am self conscious about the way I dress                                                                                                                                                                                                                                                                                                                 | 1 <input type="checkbox"/> | 2 <input type="checkbox"/> | 3 <input type="checkbox"/> | 4 <input type="checkbox"/> | 5 <input type="checkbox"/> |                            |                            |                            |
| 12. One or both of my arms are swollen or tender                                                                                                                                                                                                                                                                                                              | 1 <input type="checkbox"/> | 2 <input type="checkbox"/> | 3 <input type="checkbox"/> | 4 <input type="checkbox"/> | 5 <input type="checkbox"/> |                            |                            |                            |
| 13. I feel sexually attractive                                                                                                                                                                                                                                                                                                                                | 1 <input type="checkbox"/> | 2 <input type="checkbox"/> | 3 <input type="checkbox"/> | 4 <input type="checkbox"/> | 5 <input type="checkbox"/> |                            |                            |                            |
| 14. I am bothered by hair loss                                                                                                                                                                                                                                                                                                                                | 1 <input type="checkbox"/> | 2 <input type="checkbox"/> | 3 <input type="checkbox"/> | 4 <input type="checkbox"/> | 5 <input type="checkbox"/> |                            |                            |                            |
| 15. I worry that other members of my family might someday get the same illness I have                                                                                                                                                                                                                                                                         | 1 <input type="checkbox"/> | 2 <input type="checkbox"/> | 3 <input type="checkbox"/> | 4 <input type="checkbox"/> | 5 <input type="checkbox"/> |                            |                            |                            |
| 16. I worry about the effect of stress on my illness                                                                                                                                                                                                                                                                                                          | 1 <input type="checkbox"/> | 2 <input type="checkbox"/> | 3 <input type="checkbox"/> | 4 <input type="checkbox"/> | 5 <input type="checkbox"/> |                            |                            |                            |
| 17. I am bothered by a change in weight                                                                                                                                                                                                                                                                                                                       | 1 <input type="checkbox"/> | 2 <input type="checkbox"/> | 3 <input type="checkbox"/> | 4 <input type="checkbox"/> | 5 <input type="checkbox"/> |                            |                            |                            |
| 18. I have certain parts of my body where I experience pain                                                                                                                                                                                                                                                                                                   | 1 <input type="checkbox"/> | 2 <input type="checkbox"/> | 3 <input type="checkbox"/> | 4 <input type="checkbox"/> | 5 <input type="checkbox"/> |                            |                            |                            |
| 19. In the <b>past week</b> , on how many days have you done a total of 30 minutes or more of physical activity, which was enough to raise your heart rate? <i>This may include sport, exercise and brisk walking or cycling for recreation or to get to and from places, but should not include housework or physical activity that is part of your job.</i> |                            |                            |                            |                            |                            |                            |                            |                            |
|                                                                                                                                                                                                                                                                                                                                                               | <b>None</b>                | <b>1 day</b>               | <b>2 days</b>              | <b>3 days</b>              | <b>4 days</b>              | <b>5 days</b>              | <b>6 days</b>              | <b>7 days</b>              |
|                                                                                                                                                                                                                                                                                                                                                               | 1 <input type="checkbox"/> | 2 <input type="checkbox"/> | 3 <input type="checkbox"/> | 4 <input type="checkbox"/> | 5 <input type="checkbox"/> | 6 <input type="checkbox"/> | 7 <input type="checkbox"/> | 8 <input type="checkbox"/> |

# YOUR HEALTH AND WELL BEING IN THE LAST MONTH

**The questions in this section are about your health and how you have felt during the past month.**

Sometimes people who have, or have had cancer find that they have a number of everyday difficulties to cope with following their diagnosis. These might be to do with things like their family life, social activities, finances and work.

**Please tick the response that best describes your answer.**

| <i>During the past month:</i>                                                                                                                 | No difficulty              | A little                   | Quite a bit                | Very much                  | Does not apply             |
|-----------------------------------------------------------------------------------------------------------------------------------------------|----------------------------|----------------------------|----------------------------|----------------------------|----------------------------|
| 20. Have you had any difficulty in maintaining your independence?                                                                             | 1 <input type="checkbox"/> | 2 <input type="checkbox"/> | 3 <input type="checkbox"/> | 4 <input type="checkbox"/> | 5 <input type="checkbox"/> |
| 21. Have you had any difficulty in carrying out your domestic chores? (e.g. cleaning, gardening, cooking, shopping)                           | 1 <input type="checkbox"/> | 2 <input type="checkbox"/> | 3 <input type="checkbox"/> | 4 <input type="checkbox"/> | 5 <input type="checkbox"/> |
| 22. Have you had any difficulty with managing your own personal care? (e.g. bathing, dressing, washing)                                       | 1 <input type="checkbox"/> | 2 <input type="checkbox"/> | 3 <input type="checkbox"/> | 4 <input type="checkbox"/> | 5 <input type="checkbox"/> |
| 23. Have you had any difficulty with looking after those who depend on you? (e.g. children, dependent adults, pets)                           | 1 <input type="checkbox"/> | 2 <input type="checkbox"/> | 3 <input type="checkbox"/> | 4 <input type="checkbox"/> | 5 <input type="checkbox"/> |
| 24. Have any of those close to you (e.g. partner, children, parents) had any difficulty with the support available to them?                   | 1 <input type="checkbox"/> | 2 <input type="checkbox"/> | 3 <input type="checkbox"/> | 4 <input type="checkbox"/> | 5 <input type="checkbox"/> |
| 25. Have you had any difficulty with benefits? (e.g. statutory sick pay, attendance allowance, disability living allowance)                   | 1 <input type="checkbox"/> | 2 <input type="checkbox"/> | 3 <input type="checkbox"/> | 4 <input type="checkbox"/> | 5 <input type="checkbox"/> |
| 26. Have you had any financial difficulties?                                                                                                  | 1 <input type="checkbox"/> | 2 <input type="checkbox"/> | 3 <input type="checkbox"/> | 4 <input type="checkbox"/> | 5 <input type="checkbox"/> |
| 27. Have you had any difficulty with financial services? (e.g. loans, mortgages, pensions, insurance)                                         | 1 <input type="checkbox"/> | 2 <input type="checkbox"/> | 3 <input type="checkbox"/> | 4 <input type="checkbox"/> | 5 <input type="checkbox"/> |
| 28. Have you had any difficulty concerning your work? (or education if you are a student)                                                     | 1 <input type="checkbox"/> | 2 <input type="checkbox"/> | 3 <input type="checkbox"/> | 4 <input type="checkbox"/> | 5 <input type="checkbox"/> |
| 29. Have you had any difficulty with planning for your own or your family's future? (e.g. care of dependents, legal issues, business affairs) | 1 <input type="checkbox"/> | 2 <input type="checkbox"/> | 3 <input type="checkbox"/> | 4 <input type="checkbox"/> | 5 <input type="checkbox"/> |

# YOUR HEALTH AND WELL BEING IN THE LAST MONTH

|    |                                                     | No<br>difficulty           | A little                   | Quite<br>a bit             | Very<br>much               | Does<br>not<br>apply       |
|----|-----------------------------------------------------|----------------------------|----------------------------|----------------------------|----------------------------|----------------------------|
| 1  |                                                     |                            |                            |                            |                            |                            |
| 2  |                                                     |                            |                            |                            |                            |                            |
| 3  |                                                     |                            |                            |                            |                            |                            |
| 4  |                                                     |                            |                            |                            |                            |                            |
| 5  |                                                     |                            |                            |                            |                            |                            |
| 6  |                                                     |                            |                            |                            |                            |                            |
| 7  | <b><i>During the past month:</i></b>                |                            |                            |                            |                            |                            |
| 8  |                                                     |                            |                            |                            |                            |                            |
| 9  |                                                     |                            |                            |                            |                            |                            |
| 10 | <b>30.</b> Have you had any difficulty with         | 1 <input type="checkbox"/> | 2 <input type="checkbox"/> | 3 <input type="checkbox"/> | 4 <input type="checkbox"/> | 5 <input type="checkbox"/> |
| 11 | communicating with those closest to                 |                            |                            |                            |                            |                            |
| 12 | you? (e.g. partner, children, parents)              |                            |                            |                            |                            |                            |
| 13 |                                                     |                            |                            |                            |                            |                            |
| 14 |                                                     |                            |                            |                            |                            |                            |
| 15 | <b>31.</b> Have you had any difficulty with         | 1 <input type="checkbox"/> | 2 <input type="checkbox"/> | 3 <input type="checkbox"/> | 4 <input type="checkbox"/> | 5 <input type="checkbox"/> |
| 16 | communicating with others? (e.g. friends,           |                            |                            |                            |                            |                            |
| 17 | neighbours, colleagues, dates)                      |                            |                            |                            |                            |                            |
| 18 |                                                     |                            |                            |                            |                            |                            |
| 19 |                                                     |                            |                            |                            |                            |                            |
| 20 | <b>32.</b> Have you had any difficulty concerning   | 1 <input type="checkbox"/> | 2 <input type="checkbox"/> | 3 <input type="checkbox"/> | 4 <input type="checkbox"/> | 5 <input type="checkbox"/> |
| 21 | sexual matters?                                     |                            |                            |                            |                            |                            |
| 22 |                                                     |                            |                            |                            |                            |                            |
| 23 | <b>33.</b> Have you had any difficulty concerning   | 1 <input type="checkbox"/> | 2 <input type="checkbox"/> | 3 <input type="checkbox"/> | 4 <input type="checkbox"/> | 5 <input type="checkbox"/> |
| 24 | plans to have a family?                             |                            |                            |                            |                            |                            |
| 25 |                                                     |                            |                            |                            |                            |                            |
| 26 | <b>34.</b> Have you had any difficulty concerning   | 1 <input type="checkbox"/> | 2 <input type="checkbox"/> | 3 <input type="checkbox"/> | 4 <input type="checkbox"/> | 5 <input type="checkbox"/> |
| 27 | your appearance or body image?                      |                            |                            |                            |                            |                            |
| 28 |                                                     |                            |                            |                            |                            |                            |
| 29 |                                                     |                            |                            |                            |                            |                            |
| 30 | <b>35.</b> Have you felt isolated?                  | 1 <input type="checkbox"/> | 2 <input type="checkbox"/> | 3 <input type="checkbox"/> | 4 <input type="checkbox"/> | 5 <input type="checkbox"/> |
| 31 |                                                     |                            |                            |                            |                            |                            |
| 32 | <b>36.</b> Have you had any difficulty with getting | 1 <input type="checkbox"/> | 2 <input type="checkbox"/> | 3 <input type="checkbox"/> | 4 <input type="checkbox"/> | 5 <input type="checkbox"/> |
| 33 | around? (e.g. transport, car parking, your          |                            |                            |                            |                            |                            |
| 34 | mobility)                                           |                            |                            |                            |                            |                            |
| 35 |                                                     |                            |                            |                            |                            |                            |
| 36 |                                                     |                            |                            |                            |                            |                            |
| 37 | <b>37.</b> Have you had any difficulty with where   | 1 <input type="checkbox"/> | 2 <input type="checkbox"/> | 3 <input type="checkbox"/> | 4 <input type="checkbox"/> | 5 <input type="checkbox"/> |
| 38 | you live? (e.g. space, access, damp,                |                            |                            |                            |                            |                            |
| 39 | heating, neighbours, security)                      |                            |                            |                            |                            |                            |
| 40 |                                                     |                            |                            |                            |                            |                            |
| 41 |                                                     |                            |                            |                            |                            |                            |
| 42 | <b>38.</b> Have you had any difficulty in carrying  | 1 <input type="checkbox"/> | 2 <input type="checkbox"/> | 3 <input type="checkbox"/> | 4 <input type="checkbox"/> | 5 <input type="checkbox"/> |
| 43 | out your recreational activities? (e.g.             |                            |                            |                            |                            |                            |
| 44 | hobbies, pastimes, social pursuits)                 |                            |                            |                            |                            |                            |
| 45 |                                                     |                            |                            |                            |                            |                            |
| 46 | <b>39.</b> Have you had any difficulty with your    | 1 <input type="checkbox"/> | 2 <input type="checkbox"/> | 3 <input type="checkbox"/> | 4 <input type="checkbox"/> | 5 <input type="checkbox"/> |
| 47 | plans to travel or take a holiday?                  |                            |                            |                            |                            |                            |
| 48 |                                                     |                            |                            |                            |                            |                            |
| 49 |                                                     |                            |                            |                            |                            |                            |
| 50 | <b>40.</b> Have you had any difficulty with any     | 1 <input type="checkbox"/> | 2 <input type="checkbox"/> | 3 <input type="checkbox"/> | 4 <input type="checkbox"/> | 5 <input type="checkbox"/> |
| 51 | other area of your everyday life?                   |                            |                            |                            |                            |                            |
| 52 |                                                     |                            |                            |                            |                            |                            |
| 53 |                                                     |                            |                            |                            |                            |                            |
| 54 |                                                     |                            |                            |                            |                            |                            |
| 55 |                                                     |                            |                            |                            |                            |                            |
| 56 |                                                     |                            |                            |                            |                            |                            |
| 57 |                                                     |                            |                            |                            |                            |                            |
| 58 |                                                     |                            |                            |                            |                            |                            |
| 59 |                                                     |                            |                            |                            |                            |                            |
| 60 |                                                     |                            |                            |                            |                            |                            |

# YOUR HEALTH AND WELL BEING IN THE LAST MONTH

*The questions in this section are about your health and how you have felt during the past month.*

Please tick the response that best describes your answer.

|                                              | Strongly agree             | Agree                      | Neither agree nor disagree | Disagree                   | Strongly disagree          | Does not apply to me       |
|----------------------------------------------|----------------------------|----------------------------|----------------------------|----------------------------|----------------------------|----------------------------|
| 41. I have fears about my cancer spreading   | 1 <input type="checkbox"/> | 2 <input type="checkbox"/> | 3 <input type="checkbox"/> | 5 <input type="checkbox"/> | 5 <input type="checkbox"/> | 6 <input type="checkbox"/> |
| 42. I have fears about my cancer coming back | 1 <input type="checkbox"/> | 2 <input type="checkbox"/> | 3 <input type="checkbox"/> | 5 <input type="checkbox"/> | 5 <input type="checkbox"/> | 6 <input type="checkbox"/> |
| 43. I have fears about death and dying       | 1 <input type="checkbox"/> | 2 <input type="checkbox"/> | 3 <input type="checkbox"/> | 5 <input type="checkbox"/> | 5 <input type="checkbox"/> |                            |
| 44. I experience memory loss                 | 1 <input type="checkbox"/> | 2 <input type="checkbox"/> | 3 <input type="checkbox"/> | 5 <input type="checkbox"/> | 5 <input type="checkbox"/> |                            |
| 45. I have trouble sleeping                  | 1 <input type="checkbox"/> | 2 <input type="checkbox"/> | 3 <input type="checkbox"/> | 5 <input type="checkbox"/> | 5 <input type="checkbox"/> |                            |
| 46. I have trouble concentrating             | 1 <input type="checkbox"/> | 2 <input type="checkbox"/> | 3 <input type="checkbox"/> | 5 <input type="checkbox"/> | 5 <input type="checkbox"/> |                            |
| 47. I always feel tired                      | 1 <input type="checkbox"/> | 2 <input type="checkbox"/> | 3 <input type="checkbox"/> | 5 <input type="checkbox"/> | 5 <input type="checkbox"/> |                            |
| 48. I experience mood swings                 | 1 <input type="checkbox"/> | 2 <input type="checkbox"/> | 3 <input type="checkbox"/> | 5 <input type="checkbox"/> | 5 <input type="checkbox"/> |                            |
| 49. I am often irritable                     | 1 <input type="checkbox"/> | 2 <input type="checkbox"/> | 3 <input type="checkbox"/> | 5 <input type="checkbox"/> | 5 <input type="checkbox"/> |                            |



## OVERALL SUPPORT AND CARE

1  
2  
3 **50.** Do you have an up-to-date written care  
4 plan? *A care plan is a document that sets*  
5 *out your needs and goals for caring for*  
6 *your cancer.*  
7

- 8  Yes, definitely  
9  
10  Yes, I think so  
11  
12  No  
13  
14  I do not need a care plan  
15  
16  Don't know  
17

18  
19 **51.** Do you have a named nurse who you can  
20 contact if you have a worry about your  
21 cancer care? *A named nurse is sometimes*  
22 *known as a Clinical Nurse Specialist or*  
23 *Specialist Cancer Nurse.*  
24  
25

- 26  Yes  
27  
28  No  
29  
30  Don't know  
31  
32

33 **52.** Do you know who to contact if you have a  
34 concern about any aspect of living with or  
35 after cancer?  
36

- 37  Yes, definitely  
38  
39  Yes, I think so  
40  
41  No  
42  
43

44  
45 **53.** Do you think that hospital staff did  
46 everything they could to support you  
47 following your cancer treatment?  
48

- 49  Yes, all of the time  
50  
51  Only some of the time  
52  
53  Never  
54  
55  I did not need any support  
56  
57  
58  
59  
60

**54.** Do you think that GPs and nurses at your  
general practice do everything they can to  
support you following your cancer  
treatment?

- Yes, all of the time  
 Only some of the time  
 Never  
 My general practice is not involved  
 I do not need any support

**55.** Following your initial cancer treatment  
have you been given enough care and help  
from health and social services (for  
example, district nurses, home helps or  
occupational therapists)?

- Yes, definitely  
 Yes, to some extent  
 No  
 I did not need help from health or social  
services  
 Don't know / can't remember

**56.** Would it have been helpful to have had  
more advice or information on any of the  
following issues: **(Tick all that apply)**

- Diet and lifestyle  
 Physical activity and exercise  
 Financial help or benefits  
 Free prescriptions  
 Returning to or staying in work  
 Information / advice for family / friends /  
carer  
 The physical aspects of living with and  
after cancer (e.g. side effects or signs  
of recurrence)  
 The psychological or emotional aspects  
of living with and after cancer  
 I have all the information and advice I  
need

# ABOUT YOU

**If you are helping someone to complete this questionnaire, please make sure this information is the patient's and not your own.**

**57. What year were you born?**

(Please write in) e.g. 

|   |   |   |   |
|---|---|---|---|
| 1 | 9 | 4 | 4 |
|---|---|---|---|

|   |   |   |   |
|---|---|---|---|
| Y | Y | Y | Y |
|---|---|---|---|

**58. Are you male or female?**

- 1  Male
- 2  Female

**59. Which of the following best describes your sexual orientation?**

- 1  Heterosexual / straight (opposite sex)
- 2  Bisexual (both sexes)
- 3  Lesbian (same sex)
- 4  Other
- 5  Prefer not to answer

**60. Which statement best describes your living arrangements?**

- 1  I live with partner/spouse/family/friends
- 2  I live alone
- 3  I live in a nursing home, hospital or other long term care home
- 4  Other

**61. Do you have a long standing health condition? Please include anything other than your cancer that has troubled you over a period of time or that could affect you over a period of time.**

- 1  Yes
- 2  No
- 3  Don't know / can't say

**62. Which, if any, of the following conditions do you have? (Tick all that apply)**

- 1  Alzheimer's disease or dementia
- 2  Angina
- 3  Arthritis
- 4  Asthma or other chronic chest problem
- 5  Blindness or visual impairment
- 6  Deafness or hearing impairment
- 7  Diabetes
- 8  Epilepsy
- 9  Heart condition
- 10  High blood pressure
- 11  Kidney disease
- 12  Learning difficulty
- 13  Liver disease
- 14  Long term back problems
- 15  Long-standing mental health problem
- 16  Long-standing neurological problem
- 17  Another long-standing condition
- 18  I do not have any of these conditions

1 **63.** What was your employment status  
2 *before you were diagnosed with*  
3 *cancer?*

- 4  Full time employment  
5  
6  Part time employment  
7  
8  Homemaker  
9  
10  Student (in education)  
11  
12  Retired  
13  
14  Unemployed – and seeking work  
15  
16  Unemployed – unable to work for health  
17 reasons  
18  
19  Other  
20  
21

22 **64.** What is your employment status  
23 *currently? If on maternity or sick leave*  
24 *answer in relation to your usual*  
25 *employment status*

- 26  
27  
28  Full time employment  
29  
30  Part time employment  
31  
32  Homemaker  
33  
34  Student (in education)  
35  
36  Retired  
37  
38  Unemployed – and seeking work  
39  
40  Unemployed – unable to work for health  
41 reasons  
42  
43  Other  
44  
45

46 **65.** If you are currently employed at the  
47 *moment, are you:*

- 48  
49  Not working at all  
50  
51  Working less hours than usual  
52  
53  Working your usual hours  
54  
55  Working more hours than usual  
56  
57  This question does not apply to me  
58  
59  
60

**66.** To which of these ethnic groups would  
you say you belong? (Tick **ONE** only)

**a. WHITE**

- 1  British  
2  Irish  
3  Any other White background  
(Please write in box)

**b. MIXED**

- 4  White and Black Caribbean  
5  White and Black African  
6  White and Asian  
7  Any other Mixed background  
(Please write in box)

**c. ASIAN OR ASIAN BRITISH**

- 8  Indian  
9  Pakistani  
10  Bangladeshi  
11  Any other Asian background  
(Please write in box)

**d. BLACK OR BLACK BRITISH**

- 12  Caribbean  
13  African  
14  Any other Black background  
(Please write in box)

**e. CHINESE OR OTHER ETHNIC GROUP**

- 15  Chinese  
16  Any other ethnic group  
(Please write in box)

## COMMENTS

If you have anything else you would like to tell us about living with and beyond cancer, please do so here:

1  
2  
3  
4  
5  
6  
7  
8  
9  
10  
11  
12  
13  
14  
15  
16  
17  
18  
19  
20  
21  
22  
23  
24  
25  
26  
27  
28  
29  
30  
31  
32  
33  
34  
35  
36  
37  
38  
39  
40  
41  
42  
43  
44  
45  
46  
47  
48  
49  
50  
51  
52  
53  
54



55  
56 Questions 5-9 are EQ- 5D-5L. UK (English) v.2 © 2009 EuroQol Group. EQ-5D™ is a trade mark of the  
57 EuroQol Group.

58  
59 Questions 10 – 18 are from FACIT copyright 1987, 1997 by David Cella, PhD

60  
Questions 20 – 40 are from the Social Difficulties Inventory. Originators of the Social Difficulties Inventory:  
Wright, E.P., Cull, A. and Selby, P.



## Living with and beyond Colorectal / Gastro Intestinal Cancer

This questionnaire is about your health and quality of life since being diagnosed with your cancer. Its purpose is to provide information which can help the NHS monitor and improve the quality of health services for future patients.

### Who should complete the questionnaire?

The questions should be answered by the person named in the letter enclosed with this questionnaire. If that person needs help to complete the questionnaire, the answers should be given from their point of view – not the point of view of the person who is helping.

### Completing the questionnaire

For each question please tick clearly inside the box that is closest to your views using a black or blue pen. Don't worry if you make a mistake; simply cross out the mistake and put a tick in the correct box. Please **do not** write your name or address anywhere on the questionnaire.

### IMPORTANT INFORMATION

To make sure the information we collect is useful, we need to collect some personal details from you and to access information held about you in other NHS databases. The purpose of collecting this information is to generate aggregated statistics about the quality of life for people who are living with and beyond cancer. These statistics will be used to compare the differences in quality of life for people treated for different types of cancer by different providers and to understand what may be causing these. The results will be used to measure and improve the quality of healthcare services.

**By completing this questionnaire you are giving your consent for the information provided to be used for the above purposes. Specifically, you are agreeing that:**

- Your personal details and relevant health information can be held and used by an organisation contracted to the Department of Health to analyse the data
- Other information about you held by the Patient Demographics Service, the Secondary Users Service, Cancer Registries and other NHS databases can be held and used by an organisation contracted to the Department of Health to analyse the data
- Your personal details can be used to send you related follow-up questionnaires in the future

Your personal information will be handled securely and anonymised after analysis and before any publication.

Your personal information will not be released by the Department of Health or third party organisations working on its behalf unless required by law or where there is a clear overriding public interest.

You can withdraw the information you give the NHS in this questionnaire upon request, up to the point at which data are analysed and personal details removed.

If you have any queries about the questionnaire,  
please call the FREEPHONE helpline number on **0800 783 1775**

**Taking part in this survey is voluntary**  
**Published reports will not contain any personal details**

## YOUR HEALTH TODAY

*The questions in this section are all about your health and how you feel on the day you complete this questionnaire.*

1. What treatments have you received for your colorectal / GI cancer? **(Tick all that apply)**

1  Radiotherapy

2  Chemotherapy

3  Surgery

2. How long is it since you completed your **initial treatment** for colorectal / GI cancer? *Treatment includes any chemotherapy, radiotherapy, or surgery for your colorectal / GI cancer.*

1  I am still having my initial treatment

2  It is less than 3 months since my initial treatment

3  It is between 3 and 12 months since my initial treatment

4  It is between 1 and 5 years since my initial treatment

5  It is more than 5 years since my initial treatment

6  Don't know / can't remember

3. How has your colorectal / GI cancer responded to treatment?

1  My colorectal / GI cancer has responded fully to treatment (I am in remission)

2  My colorectal / GI cancer has been treated but is still present

3  My colorectal / GI cancer has not been treated at all

4  My colorectal / GI cancer has come back after it was originally treated

5  I am not certain what is happening with my colorectal / GI cancer

4. If you have a stoma (e.g. colostomy) is it:

1  Still present

2  Reversed

3  This does not apply to me

# YOUR HEALTH TODAY

Under each heading, please tick the **ONE** box that best describes your health TODAY.

## ) . MOBILITY

- I have no problems in walking about <sub>1</sub>
- I have slight problems in walking about <sub>2</sub>
- I have moderate problems in walking about <sub>3</sub>
- I have severe problems in walking about <sub>4</sub>
- I am unable to walk about <sub>5</sub>

## \*. SELF CARE

- I have no problems washing or dressing myself <sub>1</sub>
- I have slight problems washing or dressing myself <sub>2</sub>
- I have moderate problems washing or dressing myself <sub>3</sub>
- I have severe problems washing or dressing myself <sub>4</sub>
- I am unable to wash or dress myself <sub>5</sub>

## + . USUAL ACTIVITIES (*work, study, housework, family or leisure activities*)

- I have no problems doing my usual activities <sub>1</sub>
- I have slight problems doing my usual activities <sub>2</sub>
- I have moderate problems doing my usual activities <sub>3</sub>
- I have severe problems doing my usual activities <sub>4</sub>
- I am unable to do my usual activities <sub>5</sub>

## , . PAIN / DISCOMFORT

- I have no pain or discomfort <sub>1</sub>
- I have slight pain or discomfort <sub>2</sub>
- I have moderate pain or discomfort <sub>3</sub>
- I have severe pain or discomfort <sub>4</sub>
- I have extreme pain or discomfort <sub>5</sub>

## - . ANXIETY / DEPRESSION

- I am not anxious or depressed <sub>1</sub>
- I am slightly anxious or depressed <sub>2</sub>
- I am moderately anxious or depressed <sub>3</sub>
- I am severely anxious or depressed <sub>4</sub>
- I am extremely anxious or depressed <sub>5</sub>

For peer review only - <http://bmjopen.bmj.com/site/about/guidelines.xhtml>



# YOUR HEALTH AND WELL BEING IN THE LAST 7 DAYS

**The questions in this section are about your health and how you have felt in the past 7 days.**

Please mark one box per line to give your response.

**During the past 7 days:**

|                                                          | Not at all                    | A little bit               | Some-what                      | Quite a bit                | Very much                  |
|----------------------------------------------------------|-------------------------------|----------------------------|--------------------------------|----------------------------|----------------------------|
| <b>1\$.</b> I have swelling or cramps in my stomach area | 1 <input type="checkbox"/>    | 2 <input type="checkbox"/> | 3 <input type="checkbox"/>     | 4 <input type="checkbox"/> | 5 <input type="checkbox"/> |
| <b>1%</b> I am losing weight                             | 1 <input type="checkbox"/>    | 2 <input type="checkbox"/> | 3 <input type="checkbox"/>     | 4 <input type="checkbox"/> | 5 <input type="checkbox"/> |
| <b>1&amp;</b> I have control of my bowels                | 1 <input type="checkbox"/>    | 2 <input type="checkbox"/> | 3 <input type="checkbox"/>     | 4 <input type="checkbox"/> | 5 <input type="checkbox"/> |
| <b>1'.</b> I can digest my food well                     | 1 <input type="checkbox"/>    | 2 <input type="checkbox"/> | 3 <input type="checkbox"/>     | 4 <input type="checkbox"/> | 5 <input type="checkbox"/> |
| <b>1(.</b> I have diarrhoea                              | 1 <input type="checkbox"/>    | 2 <input type="checkbox"/> | 3 <input type="checkbox"/>     | 4 <input type="checkbox"/> | 5 <input type="checkbox"/> |
| <b>1).</b> I have a good appetite                        | 1 <input type="checkbox"/>    | 2 <input type="checkbox"/> | 3 <input type="checkbox"/>     | 4 <input type="checkbox"/> | 5 <input type="checkbox"/> |
| <b>1*.</b> I like the appearance of my body              | 1 <input type="checkbox"/>    | 2 <input type="checkbox"/> | 3 <input type="checkbox"/>     | 4 <input type="checkbox"/> | 5 <input type="checkbox"/> |
| <b>1+.</b> I have difficulty urinating                   | 1 <input type="checkbox"/>    | 2 <input type="checkbox"/> | 3 <input type="checkbox"/>     | 4 <input type="checkbox"/> | 5 <input type="checkbox"/> |
| <b>%.</b> I urinate more frequently than usual           | 1 <input type="checkbox"/>    | 2 <input type="checkbox"/> | 3 <input type="checkbox"/>     | 4 <input type="checkbox"/> | 5 <input type="checkbox"/> |
| <b>%.</b> I leak urine                                   | 1 <input type="checkbox"/>    | 2 <input type="checkbox"/> | 3 <input type="checkbox"/>     | 4 <input type="checkbox"/> | 5 <input type="checkbox"/> |
| <b>2\$.</b> Do you have an ostomy appliance / stoma?     | 1 <input type="checkbox"/> No |                            | 2 <input type="checkbox"/> Yes |                            |                            |

If yes, please answer the next two items:

|                                                                                        | Not at all                    | A little bit               | Some-what                      | Quite a bit                | Very much                  |
|----------------------------------------------------------------------------------------|-------------------------------|----------------------------|--------------------------------|----------------------------|----------------------------|
| <b>2%</b> I am embarrassed by my ostomy appliance / stoma                              | 1 <input type="checkbox"/>    | 2 <input type="checkbox"/> | 3 <input type="checkbox"/>     | 4 <input type="checkbox"/> | 5 <input type="checkbox"/> |
| <b>2&amp;</b> Caring for my ostomy appliance / stoma is difficult                      | 1 <input type="checkbox"/>    | 2 <input type="checkbox"/> | 3 <input type="checkbox"/>     | 4 <input type="checkbox"/> | 5 <input type="checkbox"/> |
| <b>2'.</b> Do you have any difficulty in controlling your bowels (e.g. any accidents)? | 1 <input type="checkbox"/> No |                            | 2 <input type="checkbox"/> Yes |                            |                            |

|                                                        | Monthly                    | Weekly                     | Daily                      | Constantly                 | It varies                  |
|--------------------------------------------------------|----------------------------|----------------------------|----------------------------|----------------------------|----------------------------|
| <b>2(.</b> If yes, how often do you have difficulties? | 1 <input type="checkbox"/> | 2 <input type="checkbox"/> | 3 <input type="checkbox"/> | 4 <input type="checkbox"/> | 5 <input type="checkbox"/> |

**2).** In the **past week**, on how many days have you done a total of 30 minutes or more of physical activity, which was enough to raise your heart rate? *This may include sport, exercise and brisk walking or cycling for recreation or to get to and from places, but should not include housework or physical activity that is part of your job.*

| None                       | 1 day                      | 2 days                     | 3 days                     | 4 days                     | 5 days                     | 6 days                     | 7 days                     |
|----------------------------|----------------------------|----------------------------|----------------------------|----------------------------|----------------------------|----------------------------|----------------------------|
| 1 <input type="checkbox"/> | 2 <input type="checkbox"/> | 3 <input type="checkbox"/> | 4 <input type="checkbox"/> | 5 <input type="checkbox"/> | 6 <input type="checkbox"/> | 7 <input type="checkbox"/> | 8 <input type="checkbox"/> |



## YOUR HEALTH AND WELL BEING IN THE LAST MONTH

*The questions in this section are about your health and how you have felt during the past month.*

Sometimes people who have, or have had cancer find that they have a number of everyday difficulties to cope with following their diagnosis. These might be to do with things like their family life, social activities, finances and work.

**Please tick the response that best describes your answer.**

| <i>During the past month:</i>                                                                                                                         | No<br>difficulty           | A little                   | Quite<br>a bit             | Very<br>much               | Does<br>not<br>apply       |
|-------------------------------------------------------------------------------------------------------------------------------------------------------|----------------------------|----------------------------|----------------------------|----------------------------|----------------------------|
| <b>2*</b> . Have you had any difficulty in maintaining your independence?                                                                             | 1 <input type="checkbox"/> | 2 <input type="checkbox"/> | 3 <input type="checkbox"/> | 4 <input type="checkbox"/> | 5 <input type="checkbox"/> |
| <b>2+</b> . Have you had any difficulty in carrying out your domestic chores? (e.g. cleaning, gardening, cooking, shopping)                           | 1 <input type="checkbox"/> | 2 <input type="checkbox"/> | 3 <input type="checkbox"/> | 4 <input type="checkbox"/> | 5 <input type="checkbox"/> |
| <b>&amp; .</b> Have you had any difficulty with managing your own personal care? (e.g. bathing, dressing, washing)                                    | 1 <input type="checkbox"/> | 2 <input type="checkbox"/> | 3 <input type="checkbox"/> | 4 <input type="checkbox"/> | 5 <input type="checkbox"/> |
| <b>&amp; -</b> Have you had any difficulty with looking after those who depend on you? (e.g. children, dependent adults, pets)                        | 1 <input type="checkbox"/> | 2 <input type="checkbox"/> | 3 <input type="checkbox"/> | 4 <input type="checkbox"/> | 5 <input type="checkbox"/> |
| <b>3\$</b> . Have any of those close to you (e.g. partner, children, parents) had any difficulty with the support available to them?                  | 1 <input type="checkbox"/> | 2 <input type="checkbox"/> | 3 <input type="checkbox"/> | 4 <input type="checkbox"/> | 5 <input type="checkbox"/> |
| <b>3%</b> Have you had any difficulty with benefits? (e.g. statutory sick pay, attendance allowance, disability living allowance)                     | 1 <input type="checkbox"/> | 2 <input type="checkbox"/> | 3 <input type="checkbox"/> | 4 <input type="checkbox"/> | 5 <input type="checkbox"/> |
| <b>3&amp;</b> Have you had any financial difficulties?                                                                                                | 1 <input type="checkbox"/> | 2 <input type="checkbox"/> | 3 <input type="checkbox"/> | 4 <input type="checkbox"/> | 5 <input type="checkbox"/> |
| <b>3'</b> . Have you had any difficulty with financial services? (e.g. loans, mortgages, pensions, insurance)                                         | 1 <input type="checkbox"/> | 2 <input type="checkbox"/> | 3 <input type="checkbox"/> | 4 <input type="checkbox"/> | 5 <input type="checkbox"/> |
| <b>3( .</b> Have you had any difficulty concerning your work? (or education if you are a student)                                                     | 1 <input type="checkbox"/> | 2 <input type="checkbox"/> | 3 <input type="checkbox"/> | 4 <input type="checkbox"/> | 5 <input type="checkbox"/> |
| <b>3)</b> . Have you had any difficulty with planning for your own or your family's future? (e.g. care of dependents, legal issues, business affairs) | 1 <input type="checkbox"/> | 2 <input type="checkbox"/> | 3 <input type="checkbox"/> | 4 <input type="checkbox"/> | 5 <input type="checkbox"/> |

# YOUR HEALTH AND WELL BEING IN THE LAST MONTH

1  
2  
3  
4  
5  
6  
7  
8  
9  
10  
11  
12  
13  
14  
15  
16  
17  
18  
19  
20  
21  
22  
23  
24  
25  
26  
27  
28  
29  
30  
31  
32  
33  
34  
35  
36  
37  
38  
39  
40  
41  
42  
43  
44  
45  
46  
47  
48  
49  
50  
51  
52  
53  
54  
55  
56  
57  
58  
59  
60

*During the past month:*

No difficulty      A little      Quite a bit      Very much      Does not apply

- 3\* . Have you had any difficulty with communicating with those closest to you? (e.g. partner, children, parents)      1       2       3       4       5
- 3+ . Have you had any difficulty with communicating with others? (e.g. friends, neighbours, colleagues, dates)      1       2       3       4       5
- ' , . Have you had any difficulty concerning sexual matters?      1       2       3       4       5
- ' - . Have you had any difficulty concerning plans to have a family?      1       2       3       4       5
- 4\$. Have you had any difficulty concerning your appearance or body image?      1       2       3       4       5
- 4% Have you felt isolated?      1       2       3       4       5
- 4& Have you had any difficulty with getting around? (e.g. transport, car parking, your mobility)      1       2       3       4       5
- 4' . Have you had any difficulty with where you live? (e.g. space, access, damp, heating, neighbours, security)      1       2       3       4       5
- 4( . Have you had any difficulty in carrying out your recreational activities? (e.g. hobbies, pastimes, social pursuits)      1       2       3       4       5
- 4) . Have you had any difficulty with your plans to travel or take a holiday?      1       2       3       4       5
- 4\* . Have you had any difficulty with any other area of your everyday life?      1       2       3       4       5

# YOUR HEALTH AND WELL BEING IN THE LAST MONTH

*The questions in this section are about your health and how you have felt during the past month.*

Please tick the response that best describes your answer.

|       |                                          | Strongly agree             | Agree                      | Neither agree nor disagree | Disagree                   | Strongly disagree          | Does not apply to me       |
|-------|------------------------------------------|----------------------------|----------------------------|----------------------------|----------------------------|----------------------------|----------------------------|
| 4+.   | I have fears about my cancer spreading   | 1 <input type="checkbox"/> | 2 <input type="checkbox"/> | 3 <input type="checkbox"/> | 4 <input type="checkbox"/> | 5 <input type="checkbox"/> | 6 <input type="checkbox"/> |
| (, .  | I have fears about my cancer coming back | 1 <input type="checkbox"/> | 2 <input type="checkbox"/> | 3 <input type="checkbox"/> | 4 <input type="checkbox"/> | 5 <input type="checkbox"/> | 6 <input type="checkbox"/> |
| ( - . | I have fears about death and dying       | 1 <input type="checkbox"/> | 2 <input type="checkbox"/> | 3 <input type="checkbox"/> | 4 <input type="checkbox"/> | 5 <input type="checkbox"/> |                            |
| 5\$.  | I experience memory loss                 | 1 <input type="checkbox"/> | 2 <input type="checkbox"/> | 3 <input type="checkbox"/> | 4 <input type="checkbox"/> | 5 <input type="checkbox"/> |                            |
| 5%.   | I have trouble sleeping                  | 1 <input type="checkbox"/> | 2 <input type="checkbox"/> | 3 <input type="checkbox"/> | 4 <input type="checkbox"/> | 5 <input type="checkbox"/> |                            |
| 5&.   | I have trouble concentrating             | 1 <input type="checkbox"/> | 2 <input type="checkbox"/> | 3 <input type="checkbox"/> | 4 <input type="checkbox"/> | 5 <input type="checkbox"/> |                            |
| 5' .  | I always feel tired                      | 1 <input type="checkbox"/> | 2 <input type="checkbox"/> | 3 <input type="checkbox"/> | 4 <input type="checkbox"/> | 5 <input type="checkbox"/> |                            |
| 5( .  | I experience mood swings                 | 1 <input type="checkbox"/> | 2 <input type="checkbox"/> | 3 <input type="checkbox"/> | 4 <input type="checkbox"/> | 5 <input type="checkbox"/> |                            |
| 5) .  | I am often irritable                     | 1 <input type="checkbox"/> | 2 <input type="checkbox"/> | 3 <input type="checkbox"/> | 4 <input type="checkbox"/> | 5 <input type="checkbox"/> |                            |

## OVERALL SUPPORT AND CARE

1  
2  
3 **5\***. Do you have an up-to-date written care  
4 plan? *A care plan is a document that sets*  
5 *out your needs and goals for caring for*  
6 *your cancer.*  
7

- 8 1  Yes, definitely  
9  
10 2  Yes, I think so  
11  
12 3  No  
13  
14 4  I do not need a care plan  
15  
16 5  Don't know  
17

18  
19 **5+**. Do you have a named nurse who you can  
20 contact if you have a worry about your  
21 cancer care? *A named nurse is sometimes*  
22 *known as a Clinical Nurse Specialist or*  
23 *Specialist Cancer Nurse.*  
24  
25

- 26 1  Yes  
27  
28 2  No  
29  
30 3  Don't know  
31  
32

33 **), .** Do you know who to contact if you have a  
34 concern about any aspect of living with or  
35 after cancer?  
36

- 37 1  Yes, definitely  
38  
39 2  Yes, I think so  
40  
41 3  No  
42  
43

44  
45 **) - .** Do you think that hospital staff did  
46 everything they could to support you  
47 following your cancer treatment?  
48

- 49 1  Yes, all of the time  
50  
51 2  Only some of the time  
52  
53 3  Never  
54  
55 4  I did not need any support  
56  
57  
58  
59  
60

**6\$.** Do you think that GPs and nurses at your  
general practice do everything they can to  
support you following your cancer  
treatment?

- 1  Yes, all of the time  
2  Only some of the time  
3  Never  
4  My general practice is not involved  
5  I do not need any support

**6%** Following your initial cancer treatment  
have you been given enough care and help  
from health and social services (for  
example, district nurses, home helps or  
occupational therapists)?

- 1  Yes, definitely  
2  Yes, to some extent  
3  No  
4  I did not need help from health or social  
services  
5  Don't know / can't remember

**6&.** Would it have been helpful to have had  
more advice or information on any of the  
following issues: **(Tick all that apply)**

- 1  Diet and lifestyle  
2  Physical activity and exercise  
3  Financial help or benefits  
4  Free prescriptions  
5  Returning to or staying in work  
6  Information / advice for family / friends /  
carer  
7  The physical aspects of living with and  
after cancer (e.g. side effects or signs  
of recurrence)  
8  The psychological or emotional aspects  
of living with and after cancer  
9  I have all the information and advice I  
need

## ABOUT YOU

**If you are helping someone to complete this questionnaire, please make sure this information is the patient's and not your own.**

**6' .** What year were you born?

(Please write in) e.g. 

|   |   |   |   |
|---|---|---|---|
| 1 | 9 | 4 | 4 |
|---|---|---|---|

|   |   |   |   |
|---|---|---|---|
| Y | Y | Y | Y |
|---|---|---|---|

**64.** Are you male or female?

- 1  Male
- 2  Female

**65.** Which of the following best describes your sexual orientation?

- 1  Heterosexual / straight (opposite sex)
- 2  Bisexual (both sexes)
- 3  Gay or lesbian (same sex)
- 4  Other
- 5  Prefer not to answer

**66.** Which statement best describes your living arrangements?

- 1  I live with partner/spouse/family/friends
- 2  I live alone
- 3  I live in a nursing home, hospital or other long term care home
- 4  Other

**67.** Do you have a long standing health condition? *Please include anything other than your cancer that has troubled you over a period of time or that could affect you over a period of time.*

- 1  Yes
- 2  No
- 3  Don't know / can't say

**68.** Which, if any, of the following conditions do you have? **(Tick all that apply)**

- 1  Alzheimer's disease or dementia
- 2  Angina
- 3  Arthritis
- 4  Asthma or other chronic chest problem
- 5  Blindness or visual impairment
- 6  Deafness or hearing impairment
- 7  Diabetes
- 8  Epilepsy
- 9  Heart condition
- 10  High blood pressure
- 11  Kidney disease
- 12  Learning difficulty
- 13  Liver disease
- 14  Long term back problems
- 15  Long-standing mental health problem
- 16  Long-standing neurological problem
- 17  Another long-standing condition
- 18  I do not have any of these conditions

1  
2  
3  
4  
5  
6  
7  
8  
9  
10  
11  
12  
13  
14  
15  
16  
17  
18  
19  
20  
21  
22  
23  
24  
25  
26  
27

**69.** What was your employment status *before you were diagnosed with cancer?*

- 1  Full time employment
- 2  Part time employment
- 3  Homemaker
- 4  Student (in education)
- 5  Retired
- 6  Unemployed – and seeking work
- 7  Unemployed – unable to work for health reasons
- 8  Other

28  
29  
30  
31  
32  
33  
34  
35  
36  
37  
38  
39  
40  
41  
42  
43  
44  
45

**70.** What is your employment status currently? *If on maternity or sick leave answer in relation to your usual employment status.*

- 1  Full time employment
- 2  Part time employment
- 3  Homemaker
- 4  Student (in education)
- 5  Retired
- 6  Unemployed – and seeking work
- 7  Unemployed – unable to work for health reasons
- 8  Other

46  
47  
48  
49  
50  
51  
52  
53  
54  
55  
56  
57  
58  
59  
60

**71.** If you are currently employed at the moment, are you:

- 1  Not working at all
- 2  Working less hours than usual
- 3  Working your usual hours
- 4  Working more hours than usual
- 5  This question does not apply to me

**72.** To which of these ethnic groups would you say you belong? **(Tick ONE only)**

**a. WHITE**

- 1  British
- 2  Irish
- 3  Any other White background  
(Please write in box)

**b. MIXED**

- 4  White and Black Caribbean
- 5  White and Black African
- 6  White and Asian
- 7  Any other Mixed background  
(Please write in box)

**c. ASIAN OR ASIAN BRITISH**

- 8  Indian
- 9  Pakistani
- 10  Bangladeshi
- 11  Any other Asian background  
(Please write in box)

**d. BLACK OR BLACK BRITISH**

- 12  Caribbean
- 13  African
- 14  Any other Black background  
(Please write in box)

**e. CHINESE OR OTHER ETHNIC GROUP**

- 15  Chinese
- 16  Any other ethnic group  
(Please write in box)

## COMMENTS

If you have anything else you would like to tell us about living with and beyond cancer, please do so here:

1  
2  
3  
4  
5  
6  
7  
8  
9  
10  
11  
12  
13  
14  
15  
16  
17  
18  
19  
20  
21  
22  
23  
24  
25  
26  
27  
28  
29  
30  
31  
32  
33  
34  
35  
36  
37  
38  
39  
40  
41  
42  
43  
44  
45  
46  
47  
48  
49  
50  
51  
52  
53  
54



55  
56 Questions 5-9 are EQ -5D-5L. UK (English) v.2 © 2009 EuroQol Group. EQ-5D™ is a trade mark of the  
57 EuroQol Group.

58  
59 Questions 10 – 18 and 20 - 22 are taken from FACIT copyright 1987, 1997 by David Cella, PhD

60  
Questions 26 – 46 are taken from the Social Difficulties Inventory. Originators of the Social Difficulties  
Inventory: Wright, E.P., Cull, A. and Selby, P.





## Living with and beyond Non Hodgkin's Lymphoma

This questionnaire is about your health and quality of life since being diagnosed with your cancer. Its purpose is to provide information which can help the NHS monitor and improve the quality of health services for future patients.

### Who should complete the questionnaire?

The questions should be answered by the person named in the letter enclosed with this questionnaire. If that person needs help to complete the questionnaire, the answers should be given from their point of view – not the point of view of the person who is helping.

### Completing the questionnaire

For each question please tick clearly inside the box that is closest to your views using a black or blue pen. Don't worry if you make a mistake; simply cross out the mistake and put a tick in the correct box. Please **do not** write your name or address anywhere on the questionnaire.

### IMPORTANT INFORMATION

To make sure the information we collect is useful, we need to collect some personal details from you and to access information held about you in other NHS databases. The purpose of collecting this information is to generate aggregated statistics about the quality of life for people who are living with and beyond cancer. These statistics will be used to compare the differences in quality of life for people treated for different types of cancer by different providers and to understand what may be causing these. The results will be used to measure and improve the quality of healthcare services.

**By completing this questionnaire you are giving your consent for the information provided to be used for the above purposes. Specifically, you are agreeing that:**

- Your personal details and relevant health information can be held and used by an organisation contracted to the Department of Health to analyse the data
- Other information about you held by the Patient Demographics Service, the Secondary Users Service, Cancer Registries and other NHS databases can be held and used by an organisation contracted to the Department of Health to analyse the data
- Your personal details can be used to send you related follow-up questionnaires in the future

Your personal information will be handled securely and anonymised after analysis and before any publication.

Your personal information will not be released by the Department of Health or third party organisations working on its behalf unless required by law or where there is a clear overriding public interest.

You can withdraw the information you give the NHS in this questionnaire upon request, up to the point at which data are analysed and personal details removed.

If you have any queries about the questionnaire,  
please call the FREEPHONE helpline number on **0800 783 1775**

**Taking part in this survey is voluntary**  
**Published reports will not contain any personal details**



## YOUR HEALTH TODAY

*The questions in this section are all about your health and how you feel on the day you complete this questionnaire.*

1. What treatments have you received for your Non Hodgkin's Lymphoma (NHL)? (Tick all that apply)

- 1  Radiotherapy
- 2  Chemotherapy
- 3  Surgery
- 4  Antibody therapy (including Rituximab)
- 5  Stem cell transplant

2. How long is it since you completed your **initial treatment** for NHL? *Treatment includes any chemotherapy, radiotherapy, or surgery for your NHL. When answering this question please do not include antibody (Rituximab) treatment which you may have been given as a maintenance treatment following chemotherapy.*

- 1  I am still having my initial treatment
- 2  It is less than 3 months since my initial treatment
- 3  It is between 3 and 12 months since my initial treatment
- 4  It is between 1 and 5 years since my initial treatment
- 5  It is more than 5 years since my initial treatment
- 6  Don't know / can't remember

3. How has your NHL responded to treatment?

- 1  My NHL has responded fully to treatment (I am in remission)
- 2  My NHL has been treated but is still present
- 3  My NHL has not been treated at all
- 4  My NHL has come back after it was originally treated
- 5  I am not certain what is happening with my NHL

# YOUR HEALTH TODAY

Under each heading, please tick the ONE box that best describes your health TODAY.

## 4. MOBILITY

- I have no problems in walking about <sub>1</sub>
- I have slight problems in walking about <sub>2</sub>
- I have moderate problems in walking about <sub>3</sub>
- I have severe problems in walking about <sub>4</sub>
- I am unable to walk about <sub>5</sub>

## 5. SELF CARE

- I have no problems washing or dressing myself <sub>1</sub>
- I have slight problems washing or dressing myself <sub>2</sub>
- I have moderate problems washing or dressing myself <sub>3</sub>
- I have severe problems washing or dressing myself <sub>4</sub>
- I am unable to wash or dress myself <sub>5</sub>

## 6. USUAL ACTIVITIES (*work, study, housework, family or leisure activities*)

- I have no problems doing my usual activities <sub>1</sub>
- I have slight problems doing my usual activities <sub>2</sub>
- I have moderate problems doing my usual activities <sub>3</sub>
- I have severe problems doing my usual activities <sub>4</sub>
- I am unable to do my usual activities <sub>5</sub>

## 7. PAIN / DISCOMFORT

- I have no pain or discomfort <sub>1</sub>
- I have slight pain or discomfort <sub>2</sub>
- I have moderate pain or discomfort <sub>3</sub>
- I have severe pain or discomfort <sub>4</sub>
- I have extreme pain or discomfort <sub>5</sub>

## 8. ANXIETY / DEPRESSION

- I am not anxious or depressed <sub>1</sub>
- I am slightly anxious or depressed <sub>2</sub>
- I am moderately anxious or depressed <sub>3</sub>
- I am severely anxious or depressed <sub>4</sub>
- I am extremely anxious or depressed <sub>5</sub>

## YOUR HEALTH AND WELL BEING IN THE LAST 7 DAYS

*The questions in this section are about your health and how you have felt in the past 7 days.*

Please mark one box per line to give your response.

| <i>During the past 7 days:</i> |                                                                                                                                                                                                                                                                                                                                                           | Not at all                 | A little bit               | Some-what                  | Quite a bit                | Very much                  |                            |                            |
|--------------------------------|-----------------------------------------------------------------------------------------------------------------------------------------------------------------------------------------------------------------------------------------------------------------------------------------------------------------------------------------------------------|----------------------------|----------------------------|----------------------------|----------------------------|----------------------------|----------------------------|----------------------------|
| 9.                             | I have certain parts of my body where I experience pain                                                                                                                                                                                                                                                                                                   | 1 <input type="checkbox"/> | 2 <input type="checkbox"/> | 3 <input type="checkbox"/> | 4 <input type="checkbox"/> | 5 <input type="checkbox"/> |                            |                            |
| 10.                            | I am bothered by lumps or swelling in certain parts of my body (e.g. neck, armpits, or groin)                                                                                                                                                                                                                                                             | 1 <input type="checkbox"/> | 2 <input type="checkbox"/> | 3 <input type="checkbox"/> | 4 <input type="checkbox"/> | 5 <input type="checkbox"/> |                            |                            |
| 11.                            | I am bothered by fevers (episodes of high body temperature)                                                                                                                                                                                                                                                                                               | 1 <input type="checkbox"/> | 2 <input type="checkbox"/> | 3 <input type="checkbox"/> | 4 <input type="checkbox"/> | 5 <input type="checkbox"/> |                            |                            |
| 12.                            | I have night sweats                                                                                                                                                                                                                                                                                                                                       | 1 <input type="checkbox"/> | 2 <input type="checkbox"/> | 3 <input type="checkbox"/> | 4 <input type="checkbox"/> | 5 <input type="checkbox"/> |                            |                            |
| 13.                            | I am bothered by itching                                                                                                                                                                                                                                                                                                                                  | 1 <input type="checkbox"/> | 2 <input type="checkbox"/> | 3 <input type="checkbox"/> | 4 <input type="checkbox"/> | 5 <input type="checkbox"/> |                            |                            |
| 14.                            | I have trouble sleeping at night                                                                                                                                                                                                                                                                                                                          | 1 <input type="checkbox"/> | 2 <input type="checkbox"/> | 3 <input type="checkbox"/> | 4 <input type="checkbox"/> | 5 <input type="checkbox"/> |                            |                            |
| 15.                            | I get tired easily                                                                                                                                                                                                                                                                                                                                        | 1 <input type="checkbox"/> | 2 <input type="checkbox"/> | 3 <input type="checkbox"/> | 4 <input type="checkbox"/> | 5 <input type="checkbox"/> |                            |                            |
| 16.                            | I am losing weight                                                                                                                                                                                                                                                                                                                                        | 1 <input type="checkbox"/> | 2 <input type="checkbox"/> | 3 <input type="checkbox"/> | 4 <input type="checkbox"/> | 5 <input type="checkbox"/> |                            |                            |
| 17.                            | I have a loss of appetite                                                                                                                                                                                                                                                                                                                                 | 1 <input type="checkbox"/> | 2 <input type="checkbox"/> | 3 <input type="checkbox"/> | 4 <input type="checkbox"/> | 5 <input type="checkbox"/> |                            |                            |
| 18.                            | I have trouble concentrating                                                                                                                                                                                                                                                                                                                              | 1 <input type="checkbox"/> | 2 <input type="checkbox"/> | 3 <input type="checkbox"/> | 4 <input type="checkbox"/> | 5 <input type="checkbox"/> |                            |                            |
| 19.                            | I worry about getting infections                                                                                                                                                                                                                                                                                                                          | 1 <input type="checkbox"/> | 2 <input type="checkbox"/> | 3 <input type="checkbox"/> | 4 <input type="checkbox"/> | 5 <input type="checkbox"/> |                            |                            |
| 20.                            | I worry that I might get new symptoms of my illness                                                                                                                                                                                                                                                                                                       | 1 <input type="checkbox"/> | 2 <input type="checkbox"/> | 3 <input type="checkbox"/> | 4 <input type="checkbox"/> | 5 <input type="checkbox"/> |                            |                            |
| 21.                            | I feel isolated from others because of my illness or treatment                                                                                                                                                                                                                                                                                            | 1 <input type="checkbox"/> | 2 <input type="checkbox"/> | 3 <input type="checkbox"/> | 4 <input type="checkbox"/> | 5 <input type="checkbox"/> |                            |                            |
| 22.                            | I have emotional ups and downs                                                                                                                                                                                                                                                                                                                            | 1 <input type="checkbox"/> | 2 <input type="checkbox"/> | 3 <input type="checkbox"/> | 4 <input type="checkbox"/> | 5 <input type="checkbox"/> |                            |                            |
| 23.                            | Because of my illness, I have difficulty planning for the future                                                                                                                                                                                                                                                                                          | 1 <input type="checkbox"/> | 2 <input type="checkbox"/> | 3 <input type="checkbox"/> | 4 <input type="checkbox"/> | 5 <input type="checkbox"/> |                            |                            |
| 24.                            | In the <b>past week</b> , on how many days have you done a total of 30 minutes or more of physical activity, which was enough to raise your heart rate? <i>This may include sport, exercise and brisk walking or cycling for recreation or to get to and from places, but should not include housework or physical activity that is part of your job.</i> |                            |                            |                            |                            |                            |                            |                            |
|                                | <b>None</b>                                                                                                                                                                                                                                                                                                                                               | <b>1 day</b>               | <b>2 days</b>              | <b>3 days</b>              | <b>4 days</b>              | <b>5 days</b>              | <b>6 days</b>              | <b>7 days</b>              |
|                                | 1 <input type="checkbox"/>                                                                                                                                                                                                                                                                                                                                | 2 <input type="checkbox"/> | 3 <input type="checkbox"/> | 4 <input type="checkbox"/> | 5 <input type="checkbox"/> | 6 <input type="checkbox"/> | 7 <input type="checkbox"/> | 8 <input type="checkbox"/> |

# YOUR HEALTH AND WELL BEING IN THE LAST MONTH

**The questions in this section are about your health and how you have felt during the past month.**

Sometimes people who have, or have had cancer find that they have a number of everyday difficulties to cope with following their diagnosis. These might be to do with things like their family life, social activities, finances and work.

**Please tick the response that best describes your answer.**

| <i>During the past month:</i>                                                                                                                 | No difficulty              | A little                   | Quite a bit                | Very much                  | Does not apply             |
|-----------------------------------------------------------------------------------------------------------------------------------------------|----------------------------|----------------------------|----------------------------|----------------------------|----------------------------|
| 25. Have you had any difficulty in maintaining your independence?                                                                             | 1 <input type="checkbox"/> | 2 <input type="checkbox"/> | 3 <input type="checkbox"/> | 4 <input type="checkbox"/> | 5 <input type="checkbox"/> |
| 26. Have you had any difficulty in carrying out your domestic chores? (e.g. cleaning, gardening, cooking, shopping)                           | 1 <input type="checkbox"/> | 2 <input type="checkbox"/> | 3 <input type="checkbox"/> | 4 <input type="checkbox"/> | 5 <input type="checkbox"/> |
| 27. Have you had any difficulty with managing your own personal care? (e.g. bathing, dressing, washing)                                       | 1 <input type="checkbox"/> | 2 <input type="checkbox"/> | 3 <input type="checkbox"/> | 4 <input type="checkbox"/> | 5 <input type="checkbox"/> |
| 28. Have you had any difficulty with looking after those who depend on you? (e.g. children, dependent adults, pets)                           | 1 <input type="checkbox"/> | 2 <input type="checkbox"/> | 3 <input type="checkbox"/> | 4 <input type="checkbox"/> | 5 <input type="checkbox"/> |
| 29. Have any of those close to you (e.g. partner, children, parents) had any difficulty with the support available to them?                   | 1 <input type="checkbox"/> | 2 <input type="checkbox"/> | 3 <input type="checkbox"/> | 4 <input type="checkbox"/> | 5 <input type="checkbox"/> |
| 30. Have you had any difficulty with benefits? (e.g. statutory sick pay, attendance allowance, disability living allowance)                   | 1 <input type="checkbox"/> | 2 <input type="checkbox"/> | 3 <input type="checkbox"/> | 4 <input type="checkbox"/> | 5 <input type="checkbox"/> |
| 31. Have you had any financial difficulties?                                                                                                  | 1 <input type="checkbox"/> | 2 <input type="checkbox"/> | 3 <input type="checkbox"/> | 4 <input type="checkbox"/> | 5 <input type="checkbox"/> |
| 32. Have you had any difficulty with financial services? (e.g. loans, mortgages, pensions, insurance)                                         | 1 <input type="checkbox"/> | 2 <input type="checkbox"/> | 3 <input type="checkbox"/> | 4 <input type="checkbox"/> | 5 <input type="checkbox"/> |
| 33. Have you had any difficulty concerning your work? (or education if you are a student)                                                     | 1 <input type="checkbox"/> | 2 <input type="checkbox"/> | 3 <input type="checkbox"/> | 4 <input type="checkbox"/> | 5 <input type="checkbox"/> |
| 34. Have you had any difficulty with planning for your own or your family's future? (e.g. care of dependents, legal issues, business affairs) | 1 <input type="checkbox"/> | 2 <input type="checkbox"/> | 3 <input type="checkbox"/> | 4 <input type="checkbox"/> | 5 <input type="checkbox"/> |

# YOUR HEALTH AND WELL BEING IN THE LAST MONTH

|    |                                                     | No<br>difficulty           | A little                   | Quite<br>a bit             | Very<br>much               | Does<br>not<br>apply       |
|----|-----------------------------------------------------|----------------------------|----------------------------|----------------------------|----------------------------|----------------------------|
| 1  |                                                     |                            |                            |                            |                            |                            |
| 2  |                                                     |                            |                            |                            |                            |                            |
| 3  |                                                     |                            |                            |                            |                            |                            |
| 4  |                                                     |                            |                            |                            |                            |                            |
| 5  |                                                     |                            |                            |                            |                            |                            |
| 6  |                                                     |                            |                            |                            |                            |                            |
| 7  | <b><i>During the past month:</i></b>                |                            |                            |                            |                            |                            |
| 8  |                                                     |                            |                            |                            |                            |                            |
| 9  |                                                     |                            |                            |                            |                            |                            |
| 10 | <b>35.</b> Have you had any difficulty with         | 1 <input type="checkbox"/> | 2 <input type="checkbox"/> | 3 <input type="checkbox"/> | 4 <input type="checkbox"/> | 5 <input type="checkbox"/> |
| 11 | communicating with those closest to                 |                            |                            |                            |                            |                            |
| 12 | you? (e.g. partner, children, parents)              |                            |                            |                            |                            |                            |
| 13 |                                                     |                            |                            |                            |                            |                            |
| 14 |                                                     |                            |                            |                            |                            |                            |
| 15 | <b>36.</b> Have you had any difficulty with         | 1 <input type="checkbox"/> | 2 <input type="checkbox"/> | 3 <input type="checkbox"/> | 4 <input type="checkbox"/> | 5 <input type="checkbox"/> |
| 16 | communicating with others? (e.g. friends,           |                            |                            |                            |                            |                            |
| 17 | neighbours, colleagues, dates)                      |                            |                            |                            |                            |                            |
| 18 |                                                     |                            |                            |                            |                            |                            |
| 19 |                                                     |                            |                            |                            |                            |                            |
| 20 | <b>37.</b> Have you had any difficulty concerning   | 1 <input type="checkbox"/> | 2 <input type="checkbox"/> | 3 <input type="checkbox"/> | 4 <input type="checkbox"/> | 5 <input type="checkbox"/> |
| 21 | sexual matters?                                     |                            |                            |                            |                            |                            |
| 22 |                                                     |                            |                            |                            |                            |                            |
| 23 | <b>38.</b> Have you had any difficulty concerning   | 1 <input type="checkbox"/> | 2 <input type="checkbox"/> | 3 <input type="checkbox"/> | 4 <input type="checkbox"/> | 5 <input type="checkbox"/> |
| 24 | plans to have a family?                             |                            |                            |                            |                            |                            |
| 25 |                                                     |                            |                            |                            |                            |                            |
| 26 | <b>39.</b> Have you had any difficulty concerning   | 1 <input type="checkbox"/> | 2 <input type="checkbox"/> | 3 <input type="checkbox"/> | 4 <input type="checkbox"/> | 5 <input type="checkbox"/> |
| 27 | your appearance or body image?                      |                            |                            |                            |                            |                            |
| 28 |                                                     |                            |                            |                            |                            |                            |
| 29 |                                                     |                            |                            |                            |                            |                            |
| 30 | <b>40.</b> Have you felt isolated?                  | 1 <input type="checkbox"/> | 2 <input type="checkbox"/> | 3 <input type="checkbox"/> | 4 <input type="checkbox"/> | 5 <input type="checkbox"/> |
| 31 |                                                     |                            |                            |                            |                            |                            |
| 32 | <b>41.</b> Have you had any difficulty with getting | 1 <input type="checkbox"/> | 2 <input type="checkbox"/> | 3 <input type="checkbox"/> | 4 <input type="checkbox"/> | 5 <input type="checkbox"/> |
| 33 | around? (e.g. transport, car parking, your          |                            |                            |                            |                            |                            |
| 34 | mobility)                                           |                            |                            |                            |                            |                            |
| 35 |                                                     |                            |                            |                            |                            |                            |
| 36 |                                                     |                            |                            |                            |                            |                            |
| 37 | <b>42.</b> Have you had any difficulty with where   | 1 <input type="checkbox"/> | 2 <input type="checkbox"/> | 3 <input type="checkbox"/> | 4 <input type="checkbox"/> | 5 <input type="checkbox"/> |
| 38 | you live? (e.g. space, access, damp,                |                            |                            |                            |                            |                            |
| 39 | heating, neighbours, security)                      |                            |                            |                            |                            |                            |
| 40 |                                                     |                            |                            |                            |                            |                            |
| 41 |                                                     |                            |                            |                            |                            |                            |
| 42 | <b>43.</b> Have you had any difficulty in carrying  | 1 <input type="checkbox"/> | 2 <input type="checkbox"/> | 3 <input type="checkbox"/> | 4 <input type="checkbox"/> | 5 <input type="checkbox"/> |
| 43 | out your recreational activities? (e.g.             |                            |                            |                            |                            |                            |
| 44 | hobbies, pastimes, social pursuits)                 |                            |                            |                            |                            |                            |
| 45 |                                                     |                            |                            |                            |                            |                            |
| 46 | <b>44.</b> Have you had any difficulty with your    | 1 <input type="checkbox"/> | 2 <input type="checkbox"/> | 3 <input type="checkbox"/> | 4 <input type="checkbox"/> | 5 <input type="checkbox"/> |
| 47 | plans to travel or take a holiday?                  |                            |                            |                            |                            |                            |
| 48 |                                                     |                            |                            |                            |                            |                            |
| 49 |                                                     |                            |                            |                            |                            |                            |
| 50 | <b>45.</b> Have you had any difficulty with any     | 1 <input type="checkbox"/> | 2 <input type="checkbox"/> | 3 <input type="checkbox"/> | 4 <input type="checkbox"/> | 5 <input type="checkbox"/> |
| 51 | other area of your everyday life?                   |                            |                            |                            |                            |                            |
| 52 |                                                     |                            |                            |                            |                            |                            |
| 53 |                                                     |                            |                            |                            |                            |                            |
| 54 |                                                     |                            |                            |                            |                            |                            |
| 55 |                                                     |                            |                            |                            |                            |                            |
| 56 |                                                     |                            |                            |                            |                            |                            |
| 57 |                                                     |                            |                            |                            |                            |                            |
| 58 |                                                     |                            |                            |                            |                            |                            |
| 59 |                                                     |                            |                            |                            |                            |                            |
| 60 |                                                     |                            |                            |                            |                            |                            |

# YOUR HEALTH AND WELL BEING IN THE LAST MONTH

*The questions in this section are about your health and how you have felt during the past month.*

Please tick the response that best describes your answer.

|                                              | Strongly agree             | Agree                      | Neither agree nor disagree | Disagree                   | Strongly disagree          | Does not apply to me       |
|----------------------------------------------|----------------------------|----------------------------|----------------------------|----------------------------|----------------------------|----------------------------|
| 46. I have fears about my cancer spreading   | 1 <input type="checkbox"/> | 2 <input type="checkbox"/> | 3 <input type="checkbox"/> | 4 <input type="checkbox"/> | 5 <input type="checkbox"/> | 6 <input type="checkbox"/> |
| 47. I have fears about my cancer coming back | 1 <input type="checkbox"/> | 2 <input type="checkbox"/> | 3 <input type="checkbox"/> | 4 <input type="checkbox"/> | 5 <input type="checkbox"/> | 6 <input type="checkbox"/> |
| 48. I have fears about death and dying       | 1 <input type="checkbox"/> | 2 <input type="checkbox"/> | 3 <input type="checkbox"/> | 4 <input type="checkbox"/> | 5 <input type="checkbox"/> |                            |
| 49. I experience memory loss                 | 1 <input type="checkbox"/> | 2 <input type="checkbox"/> | 3 <input type="checkbox"/> | 4 <input type="checkbox"/> | 5 <input type="checkbox"/> |                            |
| 50. I have trouble sleeping                  | 1 <input type="checkbox"/> | 2 <input type="checkbox"/> | 3 <input type="checkbox"/> | 4 <input type="checkbox"/> | 5 <input type="checkbox"/> |                            |
| 51. I have trouble concentrating             | 1 <input type="checkbox"/> | 2 <input type="checkbox"/> | 3 <input type="checkbox"/> | 4 <input type="checkbox"/> | 5 <input type="checkbox"/> |                            |
| 52. I always feel tired                      | 1 <input type="checkbox"/> | 2 <input type="checkbox"/> | 3 <input type="checkbox"/> | 4 <input type="checkbox"/> | 5 <input type="checkbox"/> |                            |
| 53. I experience mood swings                 | 1 <input type="checkbox"/> | 2 <input type="checkbox"/> | 3 <input type="checkbox"/> | 4 <input type="checkbox"/> | 5 <input type="checkbox"/> |                            |
| 54. I am often irritable                     | 1 <input type="checkbox"/> | 2 <input type="checkbox"/> | 3 <input type="checkbox"/> | 4 <input type="checkbox"/> | 5 <input type="checkbox"/> |                            |

## OVERALL SUPPORT AND CARE

1  
2  
3 **55.** Do you have an up-to-date written care  
4 plan? *A care plan is a document that sets*  
5 *out your needs and goals for caring for*  
6 *your cancer.*  
7

- 8 1  Yes, definitely  
9  
10 2  Yes, I think so  
11  
12 3  No  
13  
14 4  I do not need a care plan  
15  
16 5  Don't know  
17

18  
19 **56.** Do you have a named nurse who you can  
20 contact if you have a worry about your  
21 cancer care? *A named nurse is sometimes*  
22 *known as a Clinical Nurse Specialist or*  
23 *Specialist Cancer Nurse.*  
24

- 25  
26 1  Yes  
27  
28 2  No  
29  
30 3  Don't know  
31

32  
33 **57.** Do you know who to contact if you have a  
34 concern about any aspect of living with or  
35 after cancer?  
36

- 37 1  Yes, definitely  
38  
39 2  Yes, I think so  
40  
41 3  No  
42

43  
44 **58.** Do you think that hospital staff did  
45 everything they could to support you  
46 following your cancer treatment?  
47

- 48  
49 1  Yes, all of the time  
50  
51 2  Only some of the time  
52  
53 3  Never  
54  
55 4  I did not need any support  
56  
57  
58  
59  
60

**59.** Do you think that GPs and nurses at your  
general practice do everything they can to  
support you following your cancer  
treatment?

- 1  Yes, all of the time  
2  Only some of the time  
3  Never  
4  My general practice is not involved  
5  I do not need any support

**60.** Following your initial cancer treatment  
have you been given enough care and help  
from health and social services (for  
example, district nurses, home helps or  
occupational therapists)?

- 1  Yes, definitely  
2  Yes, to some extent  
3  No  
4  I did not need help from health or social  
services  
5  Don't know / can't remember

**61.** Would it have been helpful to have had  
more advice or information on any of the  
following issues: **(Tick all that apply)**

- 1  Diet and lifestyle  
2  Physical activity and exercise  
3  Financial help or benefits  
4  Free prescriptions  
5  Returning to or staying in work  
6  Information / advice for family / friends /  
carer  
7  The physical aspects of living with and  
after cancer (e.g. side effects or signs  
of recurrence)  
8  The psychological or emotional aspects  
of living with and after cancer  
9  I have all the information and advice I  
need

## ABOUT YOU

**If you are helping someone to complete this questionnaire, please make sure this information is the patient's and not your own.**

**62.** What year were you born?

(Please write in) e.g. 

|   |   |   |   |
|---|---|---|---|
| 1 | 9 | 4 | 4 |
|---|---|---|---|

|   |   |   |   |
|---|---|---|---|
| Y | Y | Y | Y |
|---|---|---|---|

**63.** Are you male or female?

- 1  Male  
2  Female

**64.** Which of the following best describes your sexual orientation?

- 1  Heterosexual / straight (opposite sex)  
2  Bisexual (both sexes)  
3  Gay or lesbian (same sex)  
4  Other  
5  Prefer not to answer

**65.** Which statement best describes your living arrangements?

- 1  I live with partner / spouse / family / friends  
2  I live alone  
3  I live in a nursing home, hospital or other long term care home  
4  Other

**66.** Do you have a long standing health condition? Please include anything **other than your cancer** that has troubled you over a period of time or that could affect you over a period of time.

- 1  Yes  
2  No  
3  Don't know / can't say

**67.** Which, if any, of the following conditions do you have? (Tick all that apply)

- 1  Alzheimer's disease or dementia  
2  Angina  
3  Arthritis  
4  Asthma or other chronic chest problem  
5  Blindness or visual impairment  
6  Deafness or hearing impairment  
7  Diabetes  
8  Epilepsy  
9  Heart condition  
10  High blood pressure  
11  Kidney disease  
12  Learning difficulty  
13  Liver disease  
14  Long term back problems  
15  Long-standing mental health problem  
16  Long-standing neurological problem  
17  Another long-standing condition  
18  I do not have any of these conditions



1 **68.** What was your employment status  
2 *before you were diagnosed with*  
3 *cancer?*

- 4  Full time employment  
5  
6  Part time employment  
7  
8  Homemaker  
9  
10  Student (in education)  
11  
12  Retired  
13  
14  Unemployed – and seeking work  
15  
16  Unemployed – unable to work for health  
17 reasons  
18  
19  Other  
20  
21

22 **69.** What is your employment status  
23 *currently? If on maternity or sick leave*  
24 *answer in relation to your usual*  
25 *employment status.*

- 26  
27  
28  Full time employment  
29  
30  Part time employment  
31  
32  Homemaker  
33  
34  Student (in education)  
35  
36  Retired  
37  
38  Unemployed – and seeking work  
39  
40  Unemployed – unable to work for health  
41 reasons  
42  
43  Other  
44  
45

46 **70.** If you are currently employed at the  
47 moment, are you:

- 48  
49  Not working at all  
50  
51  Working less hours than usual  
52  
53  Working your usual hours  
54  
55  Working more hours than usual  
56  
57  This question does not apply to me  
58  
59  
60

**71.** To which of these ethnic groups would  
you say you belong? (Tick **ONE** only)

**a. WHITE**

- 1  British  
2  Irish  
3  Any other White background  
(Please write in box)

**b. MIXED**

- 4  White and Black Caribbean  
5  White and Black African  
6  White and Asian  
7  Any other Mixed background  
(Please write in box)

**c. ASIAN OR ASIAN BRITISH**

- 8  Indian  
9  Pakistani  
10  Bangladeshi  
11  Any other Asian background  
(Please write in box)

**d. BLACK OR BLACK BRITISH**

- 12  Caribbean  
13  African  
14  Any other Black background  
(Please write in box)

**e. CHINESE OR OTHER ETHNIC GROUP**

- 15  Chinese  
16  Any other ethnic group  
(Please write in box)

## COMMENTS

**If you have anything else you would like to tell us about living with and beyond cancer, please do so here:**

For peer review only

Questions 4 - 8 are EQ-5D-5L. UK (English) v.2 © 2009 EuroQol Group. EQ-5D™ is a trade mark of the EuroQol Group.

Questions 9 – 23 are from FACIT. Copyright 1987, 1997 by David Cella, PhD

Questions 25 – 45 are from the Social Difficulties Inventory. Originators of the Social Difficulties Inventory: Wright, E.P., Cull, A. and Selby, P.



## Living with and beyond Prostate Cancer

This questionnaire is about your health and quality of life since being diagnosed with your cancer. Its purpose is to provide information which can help the NHS monitor and improve the quality of health services for future patients.

### Who should complete the questionnaire?

The questions should be answered by the person named in the letter enclosed with this questionnaire. If that person needs help to complete the questionnaire, the answers should be given from their point of view – not the point of view of the person who is helping.

### Completing the questionnaire

For each question please tick clearly inside the box that is closest to your views using a black or blue pen. Don't worry if you make a mistake; simply cross out the mistake and put a tick in the correct box. Please **do not** write your name or address anywhere on the questionnaire.

### IMPORTANT INFORMATION

To make sure the information we collect is useful, we need to collect some personal details from you and to access information held about you in other NHS databases. The purpose of collecting this information is to generate aggregated statistics about the quality of life for people who are living with and beyond cancer. These statistics will be used to compare the differences in quality of life for people treated for different types of cancer by different providers and to understand what may be causing these. The results will be used to measure and improve the quality of healthcare services.

**By completing this questionnaire you are giving your consent for the information provided to be used for the above purposes. Specifically, you are agreeing that:**

- Your personal details and relevant health information can be held and used by an organisation contracted to the Department of Health to analyse the data
- Other information about you held by the Patient Demographics Service, the Secondary Users Service, Cancer Registries and other NHS databases can be held and used by an organisation contracted to the Department of Health to analyse the data
- Your personal details can be used to send you related follow-up questionnaires in the future

Your personal information will be handled securely and anonymised after analysis and before any publication.

Your personal information will not be released by the Department of Health or third party organisations working on its behalf unless required by law or where there is a clear overriding public interest.

You can withdraw the information you give the NHS in this questionnaire upon request, up to the point at which data are analysed and personal details removed.

If you have any queries about the questionnaire,  
please call the FREEPHONE helpline number on **0800 783 1775**

**Taking part in this survey is voluntary**  
**Published reports will not contain any personal details**

## YOUR HEALTH TODAY

*The questions in this section are all about your health and how you feel on the day you complete this questionnaire.*

1. What treatments have you received for your prostate cancer? **(Tick all that apply)**

- 1  Radiotherapy (including brachytherapy) (with or without planned hormonal treatment)
- 2  Surgery
- 3  Hormone treatment
- 4  Chemotherapy (not including hormones)
- 5  HIFU
- 6  Cryotherapy
- 7  Active Surveillance (close monitoring but no current intervention)

2. How long is it since you completed your **initial treatment** for prostate cancer? *Treatment includes any chemotherapy, radiotherapy, or surgery for your prostate cancer. When answering this question please do not include hormone treatments.*

- 1  I am still having my initial treatment
- 2  It is less than 3 months since my initial treatment
- 3  It is between 3 and 12 months since my initial treatment
- 4  It is between 1 and 5 years since my initial treatment
- 5  It is more than 5 years since my initial treatment
- 6  Don't know / can't remember

3. How has your prostate cancer responded to treatment?

- 1  My prostate cancer has responded fully to treatment (I am in remission)
- 2  My prostate cancer has been treated but is still present
- 3  My prostate cancer has not been treated at all
- 4  My prostate cancer has come back after it was originally treated
- 5  I am not certain what is happening with my prostate cancer

# YOUR HEALTH TODAY

Under each heading, please tick the ONE box that best describes your health TODAY.

## 4. MOBILITY

- I have no problems in walking about <sub>1</sub>
- I have slight problems in walking about <sub>2</sub>
- I have moderate problems in walking about <sub>3</sub>
- I have severe problems in walking about <sub>4</sub>
- I am unable to walk about <sub>5</sub>

## 5. SELF CARE

- I have no problems washing or dressing myself <sub>1</sub>
- I have slight problems washing or dressing myself <sub>2</sub>
- I have moderate problems washing or dressing myself <sub>3</sub>
- I have severe problems washing or dressing myself <sub>4</sub>
- I am unable to wash or dress myself <sub>5</sub>

## 6. USUAL ACTIVITIES (*work, study, housework, family or leisure activities*)

- I have no problems doing my usual activities <sub>1</sub>
- I have slight problems doing my usual activities <sub>2</sub>
- I have moderate problems doing my usual activities <sub>3</sub>
- I have severe problems doing my usual activities <sub>4</sub>
- I am unable to do my usual activities <sub>5</sub>

## 7. PAIN / DISCOMFORT

- I have no pain or discomfort <sub>1</sub>
- I have slight pain or discomfort <sub>2</sub>
- I have moderate pain or discomfort <sub>3</sub>
- I have severe pain or discomfort <sub>4</sub>
- I have extreme pain or discomfort <sub>5</sub>

## 8. ANXIETY / DEPRESSION

- I am not anxious or depressed <sub>1</sub>
- I am slightly anxious or depressed <sub>2</sub>
- I am moderately anxious or depressed <sub>3</sub>
- I am severely anxious or depressed <sub>4</sub>
- I am extremely anxious or depressed <sub>5</sub>

For peer review only - <http://bmjopen.bmj.com/site/about/guidelines.xhtml>

# YOUR HEALTH AND WELLBEING IN THE LAST 7 DAYS

*The questions in this section are about your health and how you have felt in the past 7 days.*

Please mark one box per line to give your response.

| <i>During the past 7 days:</i>                                                                                                                                                                                                                                                                                                                                | Not at all                 | A little bit               | Some-what                  | Quite a bit                | Very much                  |                            |                            |                            |  |
|---------------------------------------------------------------------------------------------------------------------------------------------------------------------------------------------------------------------------------------------------------------------------------------------------------------------------------------------------------------|----------------------------|----------------------------|----------------------------|----------------------------|----------------------------|----------------------------|----------------------------|----------------------------|--|
| 9. I am losing weight                                                                                                                                                                                                                                                                                                                                         | 1 <input type="checkbox"/> | 2 <input type="checkbox"/> | 3 <input type="checkbox"/> | 4 <input type="checkbox"/> | 5 <input type="checkbox"/> |                            |                            |                            |  |
| 10. I have a good appetite                                                                                                                                                                                                                                                                                                                                    | 1 <input type="checkbox"/> | 2 <input type="checkbox"/> | 3 <input type="checkbox"/> | 4 <input type="checkbox"/> | 5 <input type="checkbox"/> |                            |                            |                            |  |
| 11. I have aches and pains that bother me                                                                                                                                                                                                                                                                                                                     | 1 <input type="checkbox"/> | 2 <input type="checkbox"/> | 3 <input type="checkbox"/> | 4 <input type="checkbox"/> | 5 <input type="checkbox"/> |                            |                            |                            |  |
| 12. I have certain parts of my body where I experience pain                                                                                                                                                                                                                                                                                                   | 1 <input type="checkbox"/> | 2 <input type="checkbox"/> | 3 <input type="checkbox"/> | 4 <input type="checkbox"/> | 5 <input type="checkbox"/> |                            |                            |                            |  |
| 13. My pain keeps me from doing things I want to do                                                                                                                                                                                                                                                                                                           | 1 <input type="checkbox"/> | 2 <input type="checkbox"/> | 3 <input type="checkbox"/> | 4 <input type="checkbox"/> | 5 <input type="checkbox"/> |                            |                            |                            |  |
| 14. I am satisfied with my present comfort level                                                                                                                                                                                                                                                                                                              | 1 <input type="checkbox"/> | 2 <input type="checkbox"/> | 3 <input type="checkbox"/> | 4 <input type="checkbox"/> | 5 <input type="checkbox"/> |                            |                            |                            |  |
| 15. I have trouble moving my bowels                                                                                                                                                                                                                                                                                                                           | 1 <input type="checkbox"/> | 2 <input type="checkbox"/> | 3 <input type="checkbox"/> | 4 <input type="checkbox"/> | 5 <input type="checkbox"/> |                            |                            |                            |  |
| 16. I have difficulty urinating                                                                                                                                                                                                                                                                                                                               | 1 <input type="checkbox"/> | 2 <input type="checkbox"/> | 3 <input type="checkbox"/> | 4 <input type="checkbox"/> | 5 <input type="checkbox"/> |                            |                            |                            |  |
| 17. I urinate more frequently than usual                                                                                                                                                                                                                                                                                                                      | 1 <input type="checkbox"/> | 2 <input type="checkbox"/> | 3 <input type="checkbox"/> | 4 <input type="checkbox"/> | 5 <input type="checkbox"/> |                            |                            |                            |  |
| 18. My problems with urinating limit my activities                                                                                                                                                                                                                                                                                                            | 1 <input type="checkbox"/> | 2 <input type="checkbox"/> | 3 <input type="checkbox"/> | 4 <input type="checkbox"/> | 5 <input type="checkbox"/> |                            |                            |                            |  |
| 19. I am able to have and maintain an erection                                                                                                                                                                                                                                                                                                                | 1 <input type="checkbox"/> | 2 <input type="checkbox"/> | 3 <input type="checkbox"/> | 4 <input type="checkbox"/> | 5 <input type="checkbox"/> |                            |                            |                            |  |
| 20. I leak urine                                                                                                                                                                                                                                                                                                                                              | 1 <input type="checkbox"/> | 2 <input type="checkbox"/> | 3 <input type="checkbox"/> | 4 <input type="checkbox"/> | 5 <input type="checkbox"/> |                            |                            |                            |  |
| 21. Do you have any difficulty in controlling your bowels (e.g. any accidents)?                                                                                                                                                                                                                                                                               | 1 <input type="checkbox"/> | No                         | 2 <input type="checkbox"/> | Yes                        |                            |                            |                            |                            |  |
|                                                                                                                                                                                                                                                                                                                                                               | Monthly                    | Weekly                     | Daily                      | Constantly                 | It varies                  |                            |                            |                            |  |
| 22. If yes, how often do you have difficulties?                                                                                                                                                                                                                                                                                                               | 1 <input type="checkbox"/> | 2 <input type="checkbox"/> | 3 <input type="checkbox"/> | 4 <input type="checkbox"/> | 5 <input type="checkbox"/> |                            |                            |                            |  |
| 23. In the <b>past week</b> , on how many days have you done a total of 30 minutes or more of physical activity, which was enough to raise your heart rate? <i>This may include sport, exercise and brisk walking or cycling for recreation or to get to and from places, but should not include housework or physical activity that is part of your job.</i> |                            |                            |                            |                            |                            |                            |                            |                            |  |
|                                                                                                                                                                                                                                                                                                                                                               | None                       | 1 day                      | 2 days                     | 3 days                     | 4 days                     | 5 days                     | 6 days                     | 7 days                     |  |
|                                                                                                                                                                                                                                                                                                                                                               | 1 <input type="checkbox"/> | 2 <input type="checkbox"/> | 3 <input type="checkbox"/> | 4 <input type="checkbox"/> | 5 <input type="checkbox"/> | 6 <input type="checkbox"/> | 7 <input type="checkbox"/> | 8 <input type="checkbox"/> |  |

## YOUR HEALTH AND WELL BEING IN THE LAST MONTH

**The questions in this section are about your health and how you have felt during the past month.**

Sometimes people who have, or have had cancer find that they have a number of everyday difficulties to cope with following their diagnosis. These might be to do with things like their family life, social activities, finances and work.

**Please tick the response that best describes your answer.**

| <i>During the past month:</i>                                                                                                                 | No<br>difficulty           | A little                   | Quite<br>a bit             | Very<br>much               | Does<br>not<br>apply       |
|-----------------------------------------------------------------------------------------------------------------------------------------------|----------------------------|----------------------------|----------------------------|----------------------------|----------------------------|
| 24. Have you had any difficulty in maintaining your independence?                                                                             | 1 <input type="checkbox"/> | 2 <input type="checkbox"/> | 3 <input type="checkbox"/> | 4 <input type="checkbox"/> | 5 <input type="checkbox"/> |
| 25. Have you had any difficulty in carrying out your domestic chores? (e.g. cleaning, gardening, cooking, shopping)                           | 1 <input type="checkbox"/> | 2 <input type="checkbox"/> | 3 <input type="checkbox"/> | 4 <input type="checkbox"/> | 5 <input type="checkbox"/> |
| 26. Have you had any difficulty with managing your own personal care? (e.g. bathing, dressing, washing)                                       | 1 <input type="checkbox"/> | 2 <input type="checkbox"/> | 3 <input type="checkbox"/> | 4 <input type="checkbox"/> | 5 <input type="checkbox"/> |
| 27. Have you had any difficulty with looking after those who depend on you? (e.g. children, dependent adults, pets)                           | 1 <input type="checkbox"/> | 2 <input type="checkbox"/> | 3 <input type="checkbox"/> | 4 <input type="checkbox"/> | 5 <input type="checkbox"/> |
| 28. Have any of those close to you (e.g. partner, children, parents) had any difficulty with the support available to them?                   | 1 <input type="checkbox"/> | 2 <input type="checkbox"/> | 3 <input type="checkbox"/> | 4 <input type="checkbox"/> | 5 <input type="checkbox"/> |
| 29. Have you had any difficulty with benefits? (e.g. statutory sick pay, attendance allowance, disability living allowance)                   | 1 <input type="checkbox"/> | 2 <input type="checkbox"/> | 3 <input type="checkbox"/> | 4 <input type="checkbox"/> | 5 <input type="checkbox"/> |
| 30. Have you had any financial difficulties?                                                                                                  | 1 <input type="checkbox"/> | 2 <input type="checkbox"/> | 3 <input type="checkbox"/> | 4 <input type="checkbox"/> | 5 <input type="checkbox"/> |
| 31. Have you had any difficulty with financial services? (e.g. loans, mortgages, pensions, insurance)                                         | 1 <input type="checkbox"/> | 2 <input type="checkbox"/> | 3 <input type="checkbox"/> | 4 <input type="checkbox"/> | 5 <input type="checkbox"/> |
| 32. Have you had any difficulty concerning your work? (or education if you are a student)                                                     | 1 <input type="checkbox"/> | 2 <input type="checkbox"/> | 3 <input type="checkbox"/> | 4 <input type="checkbox"/> | 5 <input type="checkbox"/> |
| 33. Have you had any difficulty with planning for your own or your family's future? (e.g. care of dependents, legal issues, business affairs) | 1 <input type="checkbox"/> | 2 <input type="checkbox"/> | 3 <input type="checkbox"/> | 4 <input type="checkbox"/> | 5 <input type="checkbox"/> |



# YOUR HEALTH AND WELL BEING IN THE LAST MONTH

1  
2  
3  
4  
5  
6  
7  
8  
9  
10  
11  
12  
13  
14  
15  
16  
17  
18  
19  
20  
21  
22  
23  
24  
25  
26  
27  
28  
29  
30  
31  
32  
33  
34  
35  
36  
37  
38  
39  
40  
41  
42  
43  
44  
45  
46  
47  
48  
49  
50  
51  
52  
53  
54  
55  
56  
57  
58  
59  
60

| <i>During the past month:</i>                                                                                                  | No difficulty              | A little                   | Quite a bit                | Very much                  | Does not apply             |
|--------------------------------------------------------------------------------------------------------------------------------|----------------------------|----------------------------|----------------------------|----------------------------|----------------------------|
| <b>34.</b> Have you had any difficulty with communicating with those closest to you? (e.g. partner, children, parents)         | 1 <input type="checkbox"/> | 2 <input type="checkbox"/> | 3 <input type="checkbox"/> | 4 <input type="checkbox"/> | 5 <input type="checkbox"/> |
| <b>35.</b> Have you had any difficulty with communicating with others? (e.g. friends, neighbours, colleagues, dates)           | 1 <input type="checkbox"/> | 2 <input type="checkbox"/> | 3 <input type="checkbox"/> | 4 <input type="checkbox"/> | 5 <input type="checkbox"/> |
| <b>36.</b> Have you had any difficulty concerning sexual matters?                                                              | 1 <input type="checkbox"/> | 2 <input type="checkbox"/> | 3 <input type="checkbox"/> | 4 <input type="checkbox"/> | 5 <input type="checkbox"/> |
| <b>37.</b> Have you had any difficulty concerning plans to have a family?                                                      | 1 <input type="checkbox"/> | 2 <input type="checkbox"/> | 3 <input type="checkbox"/> | 4 <input type="checkbox"/> | 5 <input type="checkbox"/> |
| <b>38.</b> Have you had any difficulty concerning your appearance or body image?                                               | 1 <input type="checkbox"/> | 2 <input type="checkbox"/> | 3 <input type="checkbox"/> | 4 <input type="checkbox"/> | 5 <input type="checkbox"/> |
| <b>39.</b> Have you felt isolated?                                                                                             | 1 <input type="checkbox"/> | 2 <input type="checkbox"/> | 3 <input type="checkbox"/> | 4 <input type="checkbox"/> | 5 <input type="checkbox"/> |
| <b>40.</b> Have you had any difficulty with getting around? (e.g. transport, car parking, your mobility)                       | 1 <input type="checkbox"/> | 2 <input type="checkbox"/> | 3 <input type="checkbox"/> | 4 <input type="checkbox"/> | 5 <input type="checkbox"/> |
| <b>41.</b> Have you had any difficulty with where you live? (e.g. space, access, damp, heating, neighbours, security)          | 1 <input type="checkbox"/> | 2 <input type="checkbox"/> | 3 <input type="checkbox"/> | 4 <input type="checkbox"/> | 5 <input type="checkbox"/> |
| <b>42.</b> Have you had any difficulty in carrying out your recreational activities? (e.g. hobbies, pastimes, social pursuits) | 1 <input type="checkbox"/> | 2 <input type="checkbox"/> | 3 <input type="checkbox"/> | 4 <input type="checkbox"/> | 5 <input type="checkbox"/> |
| <b>43.</b> Have you had any difficulty with your plans to travel or take a holiday?                                            | 1 <input type="checkbox"/> | 2 <input type="checkbox"/> | 3 <input type="checkbox"/> | 4 <input type="checkbox"/> | 5 <input type="checkbox"/> |
| <b>44.</b> Have you had any difficulty with any other area of your everyday life?                                              | 1 <input type="checkbox"/> | 2 <input type="checkbox"/> | 3 <input type="checkbox"/> | 4 <input type="checkbox"/> | 5 <input type="checkbox"/> |



## YOUR HEALTH AND WELL BEING IN THE LAST MONTH

*The questions in this section are about your health and how you have felt during the past month.*

Please tick the response that best describes your answer.

|                                              | Strongly agree             | Agree                      | Neither agree nor disagree | Disagree                   | Strongly disagree          | Does not apply to me       |
|----------------------------------------------|----------------------------|----------------------------|----------------------------|----------------------------|----------------------------|----------------------------|
| 45. I have fears about my cancer spreading   | 1 <input type="checkbox"/> | 2 <input type="checkbox"/> | 3 <input type="checkbox"/> | 5 <input type="checkbox"/> | 5 <input type="checkbox"/> | 6 <input type="checkbox"/> |
| 46. I have fears about my cancer coming back | 1 <input type="checkbox"/> | 2 <input type="checkbox"/> | 3 <input type="checkbox"/> | 5 <input type="checkbox"/> | 5 <input type="checkbox"/> | 6 <input type="checkbox"/> |
| 47. I have fears about death and dying       | 1 <input type="checkbox"/> | 2 <input type="checkbox"/> | 3 <input type="checkbox"/> | 5 <input type="checkbox"/> | 5 <input type="checkbox"/> |                            |
| 48. I experience memory loss                 | 1 <input type="checkbox"/> | 2 <input type="checkbox"/> | 3 <input type="checkbox"/> | 5 <input type="checkbox"/> | 5 <input type="checkbox"/> |                            |
| 49. I have trouble sleeping                  | 1 <input type="checkbox"/> | 2 <input type="checkbox"/> | 3 <input type="checkbox"/> | 5 <input type="checkbox"/> | 5 <input type="checkbox"/> |                            |
| 50. I have trouble concentrating             | 1 <input type="checkbox"/> | 2 <input type="checkbox"/> | 3 <input type="checkbox"/> | 5 <input type="checkbox"/> | 5 <input type="checkbox"/> |                            |
| 51. I always feel tired                      | 1 <input type="checkbox"/> | 2 <input type="checkbox"/> | 3 <input type="checkbox"/> | 5 <input type="checkbox"/> | 5 <input type="checkbox"/> |                            |
| 52. I experience mood swings                 | 1 <input type="checkbox"/> | 2 <input type="checkbox"/> | 3 <input type="checkbox"/> | 5 <input type="checkbox"/> | 5 <input type="checkbox"/> |                            |
| 53. I am often irritable                     | 1 <input type="checkbox"/> | 2 <input type="checkbox"/> | 3 <input type="checkbox"/> | 5 <input type="checkbox"/> | 5 <input type="checkbox"/> |                            |

## OVERALL SUPPORT AND CARE

1  
2  
3 **54.** Do you have an up-to-date written care  
4 plan? *A care plan is a document that sets*  
5 *out your needs and goals for caring for*  
6 *your cancer.*  
7

- 8  Yes, definitely  
9  
10  Yes, I think so  
11  
12  No  
13  
14  I do not need a care plan  
15  
16  Don't know  
17

18  
19 **55.** Do you have a named nurse who you can  
20 contact if you have a worry about your  
21 cancer care? *A named nurse is sometimes*  
22 *known as a Clinical Nurse Specialist or*  
23 *Specialist Cancer Nurse.*  
24  
25

- 26  Yes  
27  
28  No  
29  
30  Don't know  
31  
32

33 **56.** Do you know who to contact if you have a  
34 concern about any aspect of living with or  
35 after cancer?  
36

- 37  Yes, definitely  
38  
39  Yes, I think so  
40  
41  No  
42  
43  
44

45 **57.** Do you think that hospital staff did  
46 everything they could to support you  
47 following your cancer treatment?  
48

- 49  Yes, all of the time  
50  
51  Only some of the time  
52  
53  Never  
54  
55  I did not need any support  
56  
57  
58  
59  
60

**58.** Do you think that GPs and nurses at your  
general practice do everything they can to  
support you following your cancer  
treatment?

- Yes, all of the time  
 Only some of the time  
 Never  
 My general practice is not involved  
 I do not need any support

**59.** Following your initial cancer treatment  
have you been given enough care and help  
from health and social services (for  
example, district nurses, home helps or  
occupational therapists)?

- Yes, definitely  
 Yes, to some extent  
 No  
 I did not need help from health or social  
services  
 Don't know / can't remember

**60.** Would it have been helpful to have had  
more advice or information on any of the  
following issues: **(Tick all that apply)**

- Diet and lifestyle  
 Physical activity and exercise  
 Financial help or benefits  
 Free prescriptions  
 Returning to or staying in work  
 Information / advice for family / friends /  
carer  
 The physical aspects of living with and  
after cancer (e.g. side effects or signs  
of recurrence)  
 The psychological or emotional aspects  
of living with and after cancer  
 I have all the information and advice I  
need

## ABOUT YOU

**If you are helping someone to complete this questionnaire, please make sure this information is the patient's and not your own.**

**61.** What year were you born?

(Please write in) e.g. 

|   |   |   |   |
|---|---|---|---|
| 1 | 9 | 4 | 4 |
|---|---|---|---|

|   |   |   |   |
|---|---|---|---|
| Y | Y | Y | Y |
|---|---|---|---|

**62.** Are you male or female?

- 1  Male
- 2  Female

**63.** Which of the following best describes your sexual orientation?

- 1  Heterosexual / straight (opposite sex)
- 2  Bisexual (both sexes)
- 3  Gay (same sex)
- 4  Other
- 5  Prefer not to answer

**64.** Which statement best describes your living arrangements?

- 1  I live with partner/spouse/family/friends
- 2  I live alone
- 3  I live in a nursing home, hospital or other long term care home
- 4  Other

**65.** Do you have a long standing health condition? *Please include anything other than your cancer that has troubled you over a period of time or that could affect you over a period of time.*

- 1  Yes
- 2  No
- 3  Don't know / can't say

**66.** Which, if any, of the following conditions do you have? **(Tick all that apply)**

- 1  Alzheimer's disease or dementia
- 2  Angina
- 3  Arthritis
- 4  Asthma or other chronic chest problem
- 5  Blindness or visual impairment
- 6  Deafness or hearing impairment
- 7  Diabetes
- 8  Epilepsy
- 9  Heart condition
- 10  High blood pressure
- 11  Kidney disease
- 12  Learning difficulty
- 13  Liver disease
- 14  Long term back problems
- 15  Long-standing mental health problem
- 16  Long-standing neurological problem
- 17  Another long-standing condition
- 18  I do not have any of these conditions

1  
2  
3  
4  
5  
6  
7  
8  
9  
10  
11  
12  
13  
14  
15  
16  
17  
18  
19  
20  
21  
22  
23  
24  
25  
26  
27  
28  
29  
30  
31  
32  
33  
34  
35  
36  
37  
38  
39  
40  
41  
42  
43  
44  
45  
46  
47  
48  
49  
50  
51  
52  
53  
54  
55  
56  
57  
58  
59  
60

**67.** What was your employment status *before you were diagnosed with cancer*?

- 1  Full time employment
- 2  Part time employment
- 3  Homemaker
- 4  Student (in education)
- 5  Retired
- 6  Unemployed – and seeking work
- 7  Unemployed – unable to work for health reasons
- 8  Other

**68.** What is your employment status currently? *If on maternity or sick leave answer in relation to your usual employment status.*

- 1  Full time employment
- 2  Part time employment
- 3  Homemaker
- 4  Student (in education)
- 5  Retired
- 6  Unemployed – and seeking work
- 7  Unemployed – unable to work for health reasons
- 8  Other

**69.** If you are currently employed at the moment, are you:

- 1  Not working at all
- 2  Working less hours than usual
- 3  Working your usual hours
- 4  Working more hours than usual
- 5  This question does not apply to me

**70.** To which of these ethnic groups would you say you belong? **(Tick ONE only)**

**a. WHITE**

- 1  British
- 2  Irish
- 3  Any other White background (Please write in box)

**b. MIXED**

- 4  White and Black Caribbean
- 5  White and Black African
- 6  White and Asian
- 7  Any other Mixed background (Please write in box)

**c. ASIAN OR ASIAN BRITISH**

- 8  Indian
- 9  Pakistani
- 10  Bangladeshi
- 11  Any other Asian background (Please write in box)

**d. BLACK OR BLACK BRITISH**

- 12  Caribbean
- 13  African
- 14  Any other Black background (Please write in box)

**e. CHINESE OR OTHER ETHNIC GROUP**

- 15  Chinese
- 16  Any other ethnic group (Please write in box)

## COMMENTS

If you have anything else you would like to tell us about living with and beyond cancer, please do so here:

1  
2  
3  
4  
5  
6  
7  
8  
9  
10  
11  
12  
13  
14  
15  
16  
17  
18  
19  
20  
21  
22  
23  
24  
25  
26  
27  
28  
29  
30  
31  
32  
33  
34  
35  
36  
37  
38  
39  
40  
41  
42  
43  
44  
45  
46  
47  
48  
49  
50  
51  
52  
53  
54  
55  
56  
57  
58  
59  
60



Questions 4-8 are EQ -5D-5L. UK (English) v.2 © 2009 EuroQol Group. EQ-5D™ is a trade mark of the EuroQol Group.

Questions 9 – 20 are taken from FACIT copyright 1987, 1997 by David Cella, PhD

Questions 24 – 44 are taken from the Social Difficulties Inventory. Originators of the Social Difficulties Inventory: Wright, E.P., Cull, A. and Selby, P.

For peer review only - <http://bmjopen.bmj.com/site/about/guidelines.xhtml>

# NIGB

## Ethics and Confidentiality Committee

*NIGB Office,  
Floor 7,  
New Kings Beam House,  
22 Upper Ground,  
London,  
SE1 9BW.*

*Tel: (020) 7633 7052*

*Email: eccapplications@nhs.net*

Simon Phillips  
Department of Health  
Room 403, Wellington House  
133 -155 Waterloo Road  
London  
SE1 8UG

18 May 2011

Dear Simon

### **8-05 (b)/2010 National Cancer Survivorship Initiative – patient reported outcome survey of cancer survivors**

Thank you for your application for support under section 251 of the NHS Act 2006 to process patient identifiable information without consent. This application was considered by the Ethics and Confidentiality Committee at its meeting on 01 December 2010.

#### **Context**

This application from the Department of Health (acting as sponsor) and Quality Health (the implementation provider) sought support to cover the pilot phase of a proposed national survey of cancer survivors, which is intended to last up until 30 June 2011.

**Update: due to slippages in timetables, it has been noted that following notification on 17 May 2011, that the survey will be completed by September 2011.**

The purpose of this activity was to aim to improve understanding of quality of life outcomes for cancer survivors and was intended to support the DH National Cancer Survivorship Initiative (NCSI). The activity would build upon the current national Cancer Patient Experience Survey Programme (CPESP) 2010 which focuses on the experience of care of cancer patients.

Section 251 support was sought to enable the legitimate transfer of patient data from the Cancer Registries to Quality Health, and for Quality Health to liaise with cancer centres so that patient questionnaires would be sent to patients under cover of appropriate cancer centre letter headed paper. Support was also required to enable a sample to be identified from the cancer registries. To carry out the activity, Quality Health would require access to name, address, sex, ethnic group, year of birth, NHS number, ICD10 code, speciality code, date of diagnosis, and Trust NACS code for most recent treatment spell.

#### **Outcome**

## Ethics and Confidentiality Committee

1  
2  
3  
4  
5  
6  
7 The letter dated 07 December 2010 set out the Committee's rationale and decision for its  
8 recommendation of provisional support, subject to a number of clarifications and conditions of  
9 approval. A response was subsequently provided providing copies of requested documentation  
10 and further explanation around the clarification areas.  
11

12 In particular, Members debated the response to the information being sent on GP headed paper,  
13 and on balance and in this specific instance, agreed that this would not be feasible.  
14

15 As all aspects have been satisfactorily addressed, this letter provides confirmation of your final  
16 approval, and our Register of approved applications will shortly be updated to include this  
17 application.  
18

19  
20  
21 If you have any queries regarding the outcome of this letter please do not hesitate to contact the  
22 NIGB Office on 020 7633 7052. Email queries should be sent to [eccapplications@nhs.net](mailto:eccapplications@nhs.net).  
23  
24

25  
26 Yours sincerely  
27  
28  
29

30 Natasha Dunkley  
31 **NIGB Approvals Manager**  
32  
33  
34  
35  
36  
37  
38  
39  
40  
41  
42  
43  
44  
45  
46  
47  
48  
49  
50  
51  
52  
53  
54  
55  
56  
57  
58  
59  
60

### Ethics and Confidentiality Committee Standard conditions of approval

The support provided under section 251 is subject to the following standard conditions.

The applicant will ensure that:

1. The requested patient identifiable information is only used for the purpose(s) set out in the application.
2. Confidentiality is preserved and that there is no disclosure of information in aggregate or patient level form that may inferentially identify a person, nor will any attempt be made to identify individuals, households or organisations in the data.
3. Requirements of the Statistics and Registration Services Act 2007 are adhered to regarding publication when relevant.
4. All staff with access to patient identifiable information have contractual obligations of confidentiality, enforceable through disciplinary procedures.
5. All staff with access to patient identifiable information have received appropriate ongoing training to ensure they are aware of their responsibilities.
6. Activities are consistent with the Data Protection Act 1998.
7. Audit of data processing by a designated agent of the Secretary of State is facilitated and supported.
8. The wishes of people who have withheld or withdrawn their consent are respected.
9. The NIGB Office is notified of any significant changes which impact on the approval of the application.
10. An annual review to be provided no later than 12 months from date of your final approval letter



STROBE 2007 (v4) Statement—Checklist of items that should be included in reports of *cross-sectional studies*

| Section/Topic                | Item # | Recommendation                                                                                                                                                                       | Reported on page # |
|------------------------------|--------|--------------------------------------------------------------------------------------------------------------------------------------------------------------------------------------|--------------------|
| Title and abstract           | 1      | (a) Indicate the study's design with a commonly used term in the title or the abstract                                                                                               | 1                  |
|                              |        | (b) Provide in the abstract an informative and balanced summary of what was done and what was found                                                                                  | 2                  |
| <b>Introduction</b>          |        |                                                                                                                                                                                      |                    |
| Background/rationale         | 2      | Explain the scientific background and rationale for the investigation being reported                                                                                                 | 6                  |
| Objectives                   | 3      | State specific objectives, including any prespecified hypotheses                                                                                                                     | 6                  |
| <b>Methods</b>               |        |                                                                                                                                                                                      |                    |
| Study design                 | 4      | Present key elements of study design early in the paper                                                                                                                              | 7                  |
| Setting                      | 5      | Describe the setting, locations, and relevant dates, including periods of recruitment, exposure, follow-up, and data collection                                                      | 7                  |
| Participants                 | 6      | (a) Give the eligibility criteria, and the sources and methods of selection of participants                                                                                          | 7                  |
| Variables                    | 7      | Clearly define all outcomes, exposures, predictors, potential confounders, and effect modifiers. Give diagnostic criteria, if applicable                                             | 8-10               |
| Data sources/<br>measurement | 8*     | For each variable of interest, give sources of data and details of methods of assessment (measurement). Describe comparability of assessment methods if there is more than one group | 8-10               |
| Bias                         | 9      | Describe any efforts to address potential sources of bias                                                                                                                            | 7-10               |
| Study size                   | 10     | Explain how the study size was arrived at                                                                                                                                            | 7                  |
| Quantitative variables       | 11     | Explain how quantitative variables were handled in the analyses. If applicable, describe which groupings were chosen and why                                                         | 10                 |
| Statistical methods          | 12     | (a) Describe all statistical methods, including those used to control for confounding                                                                                                | 10                 |
|                              |        | (b) Describe any methods used to examine subgroups and interactions                                                                                                                  | 10                 |
|                              |        | (c) Explain how missing data were addressed                                                                                                                                          | 12                 |
|                              |        | (d) If applicable, describe analytical methods taking account of sampling strategy                                                                                                   | 10                 |
|                              |        | (e) Describe any sensitivity analyses                                                                                                                                                | 10                 |
| <b>Results</b>               |        |                                                                                                                                                                                      |                    |

|                          |     |                                                                                                                                                                                                              |       |
|--------------------------|-----|--------------------------------------------------------------------------------------------------------------------------------------------------------------------------------------------------------------|-------|
| Participants             | 13* | (a) Report numbers of individuals at each stage of study—eg numbers potentially eligible, examined for eligibility, confirmed eligible, included in the study, completing follow-up, and analysed            | 11    |
|                          |     | (b) Give reasons for non-participation at each stage                                                                                                                                                         | 11    |
|                          |     | (c) Consider use of a flow diagram                                                                                                                                                                           | n/a   |
| Descriptive data         | 14* | (a) Give characteristics of study participants (eg demographic, clinical, social) and information on exposures and potential confounders                                                                     | 11    |
|                          |     | (b) Indicate number of participants with missing data for each variable of interest                                                                                                                          | 12    |
| Outcome data             | 15* | Report numbers of outcome events or summary measures                                                                                                                                                         | 12-16 |
| Main results             | 16  | (a) Give unadjusted estimates and, if applicable, confounder-adjusted estimates and their precision (eg, 95% confidence interval). Make clear which confounders were adjusted for and why they were included | 13-15 |
|                          |     | (b) Report category boundaries when continuous variables were categorized                                                                                                                                    | 12-16 |
|                          |     | (c) If relevant, consider translating estimates of relative risk into absolute risk for a meaningful time period                                                                                             | n/a   |
| Other analyses           | 17  | Report other analyses done—eg analyses of subgroups and interactions, and sensitivity analyses                                                                                                               | 12-16 |
| <b>Discussion</b>        |     |                                                                                                                                                                                                              |       |
| Key results              | 18  | Summarise key results with reference to study objectives                                                                                                                                                     | 17-18 |
| Limitations              | 19  | Discuss limitations of the study, taking into account sources of potential bias or imprecision. Discuss both direction and magnitude of any potential bias                                                   | 19    |
| Interpretation           | 20  | Give a cautious overall interpretation of results considering objectives, limitations, multiplicity of analyses, results from similar studies, and other relevant evidence                                   | 17-19 |
| Generalisability         | 21  | Discuss the generalisability (external validity) of the study results                                                                                                                                        | 18    |
| <b>Other information</b> |     |                                                                                                                                                                                                              |       |
| Funding                  | 22  | Give the source of funding and the role of the funders for the present study and, if applicable, for the original study on which the present article is based                                                | 21    |

\*Give information separately for cases and controls in case-control studies and, if applicable, for exposed and unexposed groups in cohort and cross-sectional studies.

**Note:** An Explanation and Elaboration article discusses each checklist item and gives methodological background and published examples of transparent reporting. The STROBE checklist is best used in conjunction with this article (freely available on the Web sites of PLoS Medicine at <http://www.plosmedicine.org/>, Annals of Internal Medicine at <http://www.annals.org/>, and Epidemiology at <http://www.epidem.com/>). Information on the STROBE Initiative is available at [www.strobe-statement.org](http://www.strobe-statement.org).

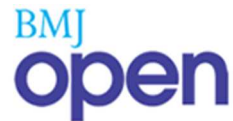

**Patient Reported Outcomes of Cancer Survivors in England  
1 to 5 years after Diagnosis: a cross-sectional survey.**

|                                 |                                                                                                                                                                                                                                                                                                                         |
|---------------------------------|-------------------------------------------------------------------------------------------------------------------------------------------------------------------------------------------------------------------------------------------------------------------------------------------------------------------------|
| Journal:                        | <i>BMJ Open</i>                                                                                                                                                                                                                                                                                                         |
| Manuscript ID:                  | bmjopen-2012-002317.R2                                                                                                                                                                                                                                                                                                  |
| Article Type:                   | Research                                                                                                                                                                                                                                                                                                                |
| Date Submitted by the Author:   | 27-Feb-2013                                                                                                                                                                                                                                                                                                             |
| Complete List of Authors:       | Glaser, Adam; Leeds Teaching Hospitals NHS Trust, Department of Paediatric Oncology<br>Fraser, Lorna<br>Corner, Jessica<br>Feltbower, Richard<br>Morris, Eva<br>Hartwell, Greg<br>Richards, Sir Mike; Director, National Cancer Action Team,<br>Wagland, Richard; University of Southampton, Faculty of Health Sciences |
| <b>Primary Subject Heading</b>: | Oncology                                                                                                                                                                                                                                                                                                                |
| Secondary Subject Heading:      | Health policy, Public health, Research methods                                                                                                                                                                                                                                                                          |
| Keywords:                       | Adult oncology < ONCOLOGY, Breast tumours < ONCOLOGY, Gastrointestinal tumours < ONCOLOGY, Lymphoma < ONCOLOGY, Urological tumours < ONCOLOGY                                                                                                                                                                           |
|                                 |                                                                                                                                                                                                                                                                                                                         |

SCHOLARONE™  
Manuscripts

only

**Title:**

**Patient Reported Outcomes of Cancer Survivors in England 1 to 5 years after Diagnosis: a cross-sectional survey.**

|                   |     |                                                                |
|-------------------|-----|----------------------------------------------------------------|
| Glaser Adam W     | DM  | Leeds Teaching Hospitals NHS Trust <sup>1</sup>                |
| Fraser Lorna K    | PhD | University of York <sup>2</sup>                                |
| Corner Jessica    | PhD | University of Southampton <sup>3</sup>                         |
| Feltbower Richard | PhD | University of Leeds <sup>4</sup>                               |
| Morris Eva JA     | PhD | University of Leeds <sup>5</sup>                               |
| Hartwell Greg     | MA  | Cancer Policy Team, Department of Health <sup>6</sup>          |
| Richards Mike     | MD  | Cancer Policy Team, Department of Health, England <sup>6</sup> |
| Wagland Richard   | MD  | University of Southampton <sup>3</sup>                         |

1. Department of Paediatric Oncology, Martin Wing, Leeds General Infirmary, Great George Street, Leeds, LS1 3EX
2. Department of Health Sciences, Heslington, York, YO10 5DD
3. Faculty of Health Sciences, University of Southampton, Southampton, SO17 1BJ.
4. Division of Epidemiology, Level 8 Worsley Building, Leeds Institute of Genetics, Health & Therapeutics, University of Leeds, Leeds, UK
5. Section of Epidemiology & Biostatistics, Leeds Institute of Molecular Medicine, Level 6 Bexley Wing, St James's University Hospital, Leeds LS9 7TF
6. Cancer Policy Team, Department of Health, Wellington House, London, England.

**Corresponding Author:**

Adam Glaser

Address: Consultant Paediatric Oncologist, Department of Paediatric Oncology, D Floor, Martin Wing, Leeds General Infirmary, Great George Street, Leeds, LS1 3EX

Tel: 0113 3928779

Email: [adam.glaser@leedsth.nhs.uk](mailto:adam.glaser@leedsth.nhs.uk)

**Key Words:**

Cancer, Survivorship, Quality of Life, Patient Reported Outcomes, EQ5D, FACT

**Word Count:**

abstract: 304 & main body of paper: 4486

1  
2  
3 Abstract

4  
5 Objectives: To determine the feasibility of collecting population based patient reported  
6 outcome measures (PROMS) in assessing quality of life (QoL) to inform development of a  
7 national PROMS programme for cancer and to begin to describe outcomes in a UK cohort of  
8 survivors.  
9

10  
11  
12  
13 Design: Cross-sectional postal survey of cancer survivors using a population-based sampling  
14 approach.  
15

16  
17  
18 Setting: English National Health Service.  
19

20  
21 Participants: 4,992 breast, colorectal, prostate and Non-Hodgkin's Lymphoma survivors one  
22 to five years from diagnosis.  
23

24  
25 Primary and Secondary Outcome Measures: Implementation issues, response rates, cancer-  
26 specific morbidities utilising items including the EQ5D, tumour-specific sub-scales of the  
27 Functional Assessment of Cancer Therapy and Social Difficulties Inventory.  
28

29  
30  
31 Results:

32  
33 3,300 (66%) survivors returned completed questionnaires. The majority aged 85+ years did  
34 not respond and response rates were lower for those from more deprived area. Response  
35 rates did not differ by gender, time since diagnosis or cancer type.  
36  
37

38  
39 The presence of one or more long term conditions was associated with significantly lower  
40 QoL scores. Individuals from most deprived areas reported lower QoL scores and poorer  
41 outcomes on other measures, as did those self-reporting recurrent disease or uncertainty  
42 about disease status. QoL scores were comparable at all time points for all cancers except  
43 NHL. QoL scores were lower than those from the general population in Health Survey for  
44 England (2008) and General Practice Patient Survey (2012).  
45  
46  
47  
48  
49

50  
51 47% of patients reported fear of recurrence whilst 20% reported moderate or severe  
52 difficulties with mobility or usual activities. Bowel and urinary problems were common  
53 among colorectal and prostate patients. Poor bowel and bladder control were significantly  
54 associated with lower QoL.  
55  
56  
57  
58  
59  
60

1  
2  
3  
4  
5  
6 Conclusions: This method of assessing QoL of cancer survivors is feasible and acceptable to  
7 most survivors. Routine collection of national population- based PROMS will enable  
8 identification of, and support for, the specific needs of survivors whilst allowing for  
9 comparison of outcome by service provider.  
10  
11  
12  
13  
14  
15  
16  
17  
18  
19  
20  
21  
22  
23  
24  
25  
26  
27  
28  
29  
30  
31  
32  
33  
34  
35  
36  
37  
38  
39  
40  
41  
42  
43  
44  
45  
46  
47  
48  
49  
50  
51  
52  
53  
54  
55  
56  
57  
58  
59  
60

For peer review only

## Article Summary

### Article Focus

To determine the feasibility of routinely collecting population-based patient reported outcomes (PROMS) of cancer survivors to gather information on quality of life and cancer related morbidities that can be used to inform the development of a national PROMS programme for cancer.

### Key messages

- Collection of population-based information on quality of life from cohorts of cancer patients who are 1 to 5 years post diagnosis through cancer registries is feasible.
- The best quality of life was reported by those in remission and with no other long term conditions.
- Information obtained by widespread extension of this methodology will enable health economies to compare outcome across provider organisations and facilitate provision of enhanced services to meet the needs of cancer survivors.

### Strengths and Limitations

- Findings relate to the largest European survey of survivors of multiple cancer types at clearly defined time points from diagnosis.
- The study design eliminates many of the criticisms which have hindered the collection of population-based cancer patient reported outcome data in the past.
- English cancer registries provide a reliable denominator population from which to identify eligible participants.
- The questionnaires for the four cancer groups were identified as having face and content validity by a panel of health and social care professionals prior to use, following review by consumers and consultation with cancer charities.
- Presence of multiple cancer groups, time points and some missing data may have resulted in a lack of power for certain analyses.

1  
2  
3  
4  
5  
6  
7  
8  
9  
10  
11  
12  
13  
14  
15  
16  
17  
18  
19  
20  
21  
22  
23  
24  
25  
26  
27  
28  
29  
30  
31  
32  
33  
34  
35  
36  
37  
38  
39  
40  
41  
42  
43  
44  
45  
46  
47  
48  
49  
50  
51  
52  
53  
54  
55  
56  
57  
58  
59  
60

- Selection bias may have arisen through differences in-response rates according to cancer group, deprivation category and age.
- The study excluded those treated in the private sector.

For peer review only



## Introduction

1.8 million people are living with and beyond a diagnosis of cancer in England and prevalence is predicted to increase by 3% per annum.<sup>1</sup> Cancer treatments are effectively reducing mortality and extending life, yet there is evidence that physical, psychological and social needs are not being addressed by the health and social care services, with individuals reporting significant unmet needs<sup>2</sup>. There is a lack of robust population-based information from which the prevalence, and impact, of disease and treatment associated morbidity burden can be ascertained and policy for appropriate interventions developed<sup>3</sup>. It has been equally difficult for health economies to compare the quality of health of those following treatment for cancer to those living with other long term conditions (LTC). These deficits have hampered the provision of comprehensive robust services for this growing population<sup>4</sup>.

In the United States a number of significant initiatives have been launched to systematically measure health outcomes in cancer survivors using patient reported outcome measures (PROMS) through the National Cancer Institute and American Cancer Society<sup>3-5-6</sup>. In Europe, at least one regional cancer register has started to collect PROMS via approaches made through the treating clinical teams<sup>7-8</sup>. The focus of PROMS work to date has been on refining treatment decision making for individuals and determining methodological approaches to implementation and analysis<sup>5-6-9-11</sup>. These efforts have yet to feed through into major national health system service improvement initiatives. The evaluation of patients' experiences of cancer care in England, through the National Cancer Patient Experience Survey, has resulted in care provider organisations and commissioners being able to identify areas of strengths and weakness in acute cancer care provision<sup>12</sup>.

Our objective was to determine the feasibility of routinely collecting population-based PROMS of cancer survivors (via a postal survey of individuals identified from cancer registry information), without introduction from clinicians or researchers known to participants, to gather information on quality of life (QoL) and cancer related morbidities that can be used to inform the development of a national PROMS programme for cancer. Feasibility was assessed for example by evaluating response rates, level of questionnaire completeness and the number of complaints from participants. Findings reported in this paper are a

1  
2  
3 summary of the analyses which are available in comprehensive form from the Department  
4 of Health (DH) website ([https://www.wp.dh.gov.uk/publications/files/2012/12/9284-TSO-](https://www.wp.dh.gov.uk/publications/files/2012/12/9284-TSO-2900701-PROMS.pdf)  
5 [2900701-PROMS.pdf](https://www.wp.dh.gov.uk/publications/files/2012/12/9284-TSO-2900701-PROMS.pdf)).  
6  
7  
8  
9

## 10 11 12 **Methods**

### 13 *Study design*

14  
15 A cross-sectional postal survey was undertaken of individuals with a diagnosis of breast,  
16 colorectal, non-Hodgkin's lymphoma (NHL) or prostate cancer one, two, three and five  
17 years earlier. These four time-points were chosen to gain an understanding of whether  
18 PROMS varied over time. Patients attending private healthcare centres (estimated to be  
19 less than 5% of cases) were excluded as the aims of the study focused on the assessment of  
20 PROMS within the National Health Service (NHS) in England.  
21  
22  
23  
24  
25  
26  
27

### 28 *Cohort Identification and Survey Process*

29  
30 Three cancer registries (Thames Cancer Registry, Eastern Cancer Registry and Information  
31 Centre, West Midlands Cancer Intelligence Unit) were chosen as representative examples  
32 of the eight cancer registries in England. They provided information on all relevant cancer  
33 diagnoses<sup>12</sup> (Supplementary File 1) between 01/02/2010-30/04/2010, 01/02/2009-  
34 30/04/2009, 01/02/2008-30/04/2008, and 01/02/2006-30/04/2006. The individual study  
35 cohorts for each cancer at time points one, two, three and five years from date of recorded  
36 diagnosis were compiled through identification of the 312 cases diagnosed most closely to  
37 a specified time-point (First of February for each year). Cases were excluded if: under the  
38 age of 16 years, deceased, or not known to have a UK address.  
39  
40  
41  
42  
43  
44  
45  
46  
47

48 Identified participants were sent a questionnaire by post by the survey provider, *Quality*  
49 *Health*. This was sent under cover of a standard introductory letter with the letter-head of  
50 the cancer centre most recently recorded by the cancer registry as having provided  
51 treatment. The survey covered patients attending 70 of 160 (43%) acute NHS Trusts  
52 delivering cancer care in England during 2011, although we were unable to determine  
53 whether these were representative of all patients. Patients consented to taking part in the  
54  
55  
56  
57  
58  
59  
60

1  
2  
3 survey by returning questionnaires and declined by not returning them, or by returning  
4 blank questionnaires. . Two reminders were sent to non-responders. Checks for deceased  
5 patients were undertaken by the registries at four separate time points in the survey  
6 process to ensure attempts were not made to contact deceased individuals.  
7  
8  
9

10  
11  
12 Details of a dedicated freephone telephone helpline, staffed 24 hours each day, were  
13 provided so the queries of any respondents could be resolved.  
14

#### 15 16 17 *Questionnaire design and content* (Supplementary files 2, 3, 4 and 5)

18  
19 Questionnaires were developed for each cancer group. Content was identified through  
20 literature review, commissioned expert reviews<sup>13-15</sup>, consultation with patient groups,  
21 cancer charities and expert advisory groups. In this way the views of multi-professional  
22 clinicians and service users were captured.  
23  
24

25  
26 Generic content included:

- 27  
28 • Demographic and treatment-related questions adapted from the National Cancer  
29 Patient Experience Survey.<sup>12</sup>
- 30  
31 • Self-reported response to treatment and disease status
- 32  
33 • Amount of physical activity performed each week quantified according to the  
34 Chief Medical Officer of England's recommendations<sup>16</sup>.
- 35  
36 • Presence or absence of long-term conditions (LTCs) other than cancer, using a list  
37 widely used in English Department of Health surveys.
- 38  
39 • EQ5D: A 5 item generic health-related quality of life measure<sup>17-18</sup> chosen as it is a  
40 generic measure of health status widely used to evaluate population health in  
41 England<sup>17</sup>.
- 42  
43 • Social Difficulties Inventory (SDI): A cancer survivor specific measure covering  
44 wider QoL domains<sup>19-20,21</sup> including information on the social consequences of  
45 cancer.
- 46  
47 • Experience of care. Relevant items to these phases of the cancer pathway were  
48 taken from the National Cancer Patient Experience Survey Questionnaire.<sup>22</sup>
- 49  
50 • Fear of recurrence and dying. These items were generated by the project team  
51 and cognitively tested on representative sample groups prior to this pilot survey.  
52  
53  
54  
55  
56  
57  
58  
59  
60

- Individual components on psychological issues and work status identified through the literature as being important to cancer survivors but not covered by other components of the survey<sup>23, 24</sup>.

Tumour-specific content included

- Functional Assessment of Cancer Therapy (FACT) tumour specific components (FACT-B, FACT-C, FACT-Lym and FACT-P for breast, colorectal, NHL and prostate cancer respectively)<sup>25</sup>.

*A detailed description of the qualitative comments provided by respondents are reported in a parallel submission to the BMJ Open.*

Cognitive testing was performed on the four site-specific versions of the questionnaire prior to their general use. This was done by sending questionnaires to volunteers (identified through cancer charities and the survey provider) prior to participating in a telephone interview. This style of testing was used to determine the population's ability to complete the questionnaire independently and to follow routing and other instructions in the questionnaire without prompting or help. Appropriate alterations were then made to the questionnaire. The two required changes were omission of a similar item from the FACT-B and FACT-P questionnaires "I am able to feel like a woman" and "I am able to feel like a man", because these questions were found to be confusing and unacceptable to volunteers.

#### *Data Handling/Analysis*

Age (at time of survey) was categorised as <55, 55-64, 65-74, 75-84, and ≥85 years. Self-reported ethnicity was grouped into white, asian, mixed, black and other. Deprivation category was based on the complete index of multiple deprivation (IMD)<sup>26</sup>. This was derived from the lower super output area (small census area) associated with their place of residence at the time of completing the survey, and used because the survey did not include questions related to income or educational level.

Participants were asked if they had any LTC other than their cancer diagnosis and were asked to tick the appropriate LTCs. This variable was categorised into 'no other', 'one other' and 'two or more LTCs'.

1  
2  
3  
4  
5 A crosswalk algorithm was used to convert the 5L EQ5D to the 3L version, allowing a  
6 weighted health score to be assigned for each individual.<sup>27</sup> United Kingdom population data  
7 were used to calculate weighted scores (range -0.5 to 1 [perfect health]). Due to skewness,  
8 this outcome variable was categorised and ordered logistic regression undertaken. Three  
9 categories representing 'high', 'medium' and 'low' QoL scores were defined for ease of  
10 interpretation; these comprised scores equal to 1, less than 1 but greater than or equal to  
11 0.5 and less than 0.5. Odds ratios should be interpreted either as the odds of being in group  
12 2 (medium QoL scores) or group 3 (low QoL scores) compared to group 1 (high QoL scores)  
13 or the odds of being in group 3 (low QoL scores ) compared to group 1 or group 2. Although  
14 this was not a standard approach and meant that information and perhaps discriminatory  
15 power was lost, our model parameterisation enabled a more natural interpretation of EQ5D  
16 QoL data. Furthermore, when comparisons were made with other alternative models, such  
17 as tobit regression, findings were very similar.  
18  
19  
20  
21  
22  
23  
24  
25  
26  
27  
28

29  
30 Cancer-specific questions from FACT<sup>25</sup> were used as explanatory variables in this analysis  
31 (FACT total score could not be calculated as only the cancer-specific subscale questions  
32 were included). Patient reported treatments were used in the analyses and treatment  
33 combinations were categorised for each cancer site with the most common used as the  
34 reference group. Given the study design, participants who had survived a year or more and  
35 who reported still receiving treatments when they completed the survey were likely to be  
36 receiving treatment for advanced or recurrent disease.  
37  
38  
39  
40  
41  
42

#### 43 *Statistical methods*

44  
45 Chi-squared tests were used to compare categorical variables. Descriptive statistics were  
46 compared across cancer sites but the statistical models were stratified by cancer site.  
47 Variables were entered into the logistic regression model based on their *a priori* clinical and  
48 public health importance after agreement by the study investigators. Formal variable  
49 selection procedures were not invoked primarily due to statistical problems associated with  
50 these data-driven procedures<sup>28</sup> and, secondly, so that findings could be compared  
51 consistently across cancer sites and time points. Statistical significance was set at 1% to  
52  
53  
54  
55  
56  
57  
58  
59  
60

1  
2  
3 minimise the chances of false-positive associations. All analyses were undertaken using  
4 STATA v12.1.  
5  
6  
7

8 *Ethics and governance*  
9

10 Approval was given to approach patients without informed consent by the National  
11 Information Governance Board (Supplementary File 6) as the study was performed as  
12 service evaluation<sup>29</sup>.  
13  
14  
15  
16  
17  
18  
19  
20  
21  
22  
23  
24  
25  
26  
27  
28  
29  
30  
31  
32  
33  
34  
35  
36  
37  
38  
39  
40  
41  
42  
43  
44  
45  
46  
47  
48  
49  
50  
51  
52  
53  
54  
55  
56  
57  
58  
59  
60

## Results

### *Participants*

Questionnaires were sent to 4992 individuals, 126 (2.5%) of these had moved or died prior to receiving the questionnaire resulting in a final sample size of 4866. 3300 completed questionnaires were received (66% of the study sample). Of the surveys received by participants, the response rate was 68% (3300/4866).

### *Response rates*

Response rate varied significantly between cancer groups (Table 1a): 69.4% in the prostate group compared to 62.3% in the NHL group ( $p < 0.001$ ).

There was significant difference in the age structure of the non-responders vs. responders with a higher proportion of non-responders in the  $\geq 85$  years age group ( $p < 0.001$ ).

Response rates differed according to deprivation status (Table 1a) with a response rate of 71.4% in the least deprived category compared to 57.1% in the most deprived category ( $p < 0.001$ ).

No difference in response rates by time since diagnosis, sex or cancer type was found (see <https://www.wp.dh.gov.uk/publications/files/2012/12/9284-TSO-2900701-PROMS.pdf> for full details).

### *Demographics of respondents (Table 1b)*

Overall there were more males than females. Median age was 69 years (range 36-102). There was significant variation in the distribution of ethnicity by cancer group with higher proportions of non-white ethnic groups with NHL. There was no significant difference by deprivation between cancer groups. Overall more than half of patients reported having a LTC. There were fewer reported LTCs in the breast cohort than in other groups but this did not reach statistical significance.

1  
2  
3  
4  
5  
6  
7  
8  
9  
10  
11  
12  
13  
14  
15  
16  
17  
18  
19  
20  
21  
22  
23  
24  
25  
26  
27  
28  
29  
30  
31  
32  
33  
34  
35  
36  
37  
38  
39  
40  
41  
42  
43  
44  
45  
46  
47  
48  
49  
50  
51  
52  
53  
54  
55  
56  
57  
58  
59  
60

For peer review only



### *Missing data*

Missing data levels were extremely low, typically less than 5% for most fields. SDI had slightly higher levels of missing data with completeness ranging from 80-85%. For the regression modelling (Tables 3a-3d) which used complete case analysis approach, completeness levels were lower and ranged from 60% (colorectal, prostate) to 83% (breast). There was no evidence that the prevalence of missing data was related to the order of the questions after examining levels of completeness for questions at the beginning compared to the end of the form.

### *Helpline calls and other contact from survey participants*

64 calls were made to the helpline, whilst further information about patient status was received via letters from patients (11) and NHS Trusts (2). The total number of enquiries was 77, representing 0.02% of the study cohort.

### *Generic PROMS*

Responses for the five EQ5D questions demonstrated that a higher percentage of NHL patients reported problems with self-care, mobility and usual activities. Two-thirds of breast cancer patients reported some degree of pain (Supplementary Table 1).

When detailed responses for the five EQ5D questions were summarised by time since diagnosis, there were no significant differences for pain, mobility, usual activities or self-care. However, the percentage reporting no anxiety or depression symptoms increased significantly from 55% at 1 year post-diagnosis to 66% after 5 years ( $p=0.01$ ) (Supplementary Table 2).

Skewed weighted health scores were obtained from the EQ5D by cancer group (Supplementary Figure 1). The prostate group had significantly higher median (0.88) scores than the other three groups (0.84) ( $p=0.001$ ). The proportion of the populations reporting high QoL scores ranged from 24.4% for breast to 40.0% for prostate cancer (Table 2). Conversely, the proportion reporting low QoL scores ranged from 8.9% for breast to 13.1% for NHL. For all tumour groups, irrespective of remission status, the percentage of

1  
2  
3 individuals reporting lower QoL scores increased as the number of other LTCs increased  
4 (Supplementary Tables 3-4).  
5  
6  
7

### 8 *Result by Tumour Type*

9  
10 Multivariable ordered logistic regression (Tables 3a-3d) identified three factors which were  
11 consistently associated with lower QoL scores irrespective of tumour type: presence of LTCs,  
12 undertaking little physical activity and self-reported disease status.  
13  
14

### 15 *Breast Cancer (Table 3a)*

16  
17 Increasing number of LTCs, having recurrence of disease or being uncertain of disease status  
18 were associated with poorer outcomes across all three measures: The presence of one (OR  
19 1.84, 95%CI 1.25,2.70) or two or more (Odds Ratio (OR) 7.30, 95%Confidence Interval (CI)  
20 4.45,11.93) LTCs was significantly associated with lower QoL scores. Individuals self-  
21 reporting recurrent disease (OR 4.70, 95%CI 1.92,11.52) or those uncertain about their  
22 disease status (OR 2.51, 95%CI 1.27,4.96) were significantly more likely to report lower QoL  
23 scores compared to those self-reporting remission.  
24  
25  
26  
27  
28  
29  
30  
31

32  
33 Increasing age (apart from those aged 85 years or older) and more days undertaking  
34 physical activity were significantly associated with better outcomes in EQ5D, SDI and FACT-B  
35 measures: Those aged 65-74 reported significantly higher QoL scores compared to under  
36 55s (OR 0.36, 95%CI 0.22,0.58). Increasing physical activity was associated with higher QoL  
37 scores with each additional reported day per week of physical activity reducing the odds of a  
38 lower score by 12% (OR 0.88, 95%CI 0.82,0.95).  
39  
40  
41  
42  
43  
44

45  
46 Individuals from the most deprived areas were significantly more likely to report lower  
47 EQ5D derived QoL scores than those from the most affluent areas (OR 3.00, 95%CI 1.64-  
48 5.50). Poorer outcomes in FACT-B items were associated with being in the most deprived  
49 category.  
50  
51  
52

### 53 *Colorectal Cancer (Table 3b)*

54  
55 The presence of one (OR 2.09, 95%CI 1.29,3.37) or two or more (OR 4.83, 95%CI 2.85,8.21)  
56 LTCs was significantly associated with lower QoL scores. Those who completed the  
57  
58  
59

questionnaire whilst undergoing treatment (OR 7.03, 95%CI 2.44,20.21), experiencing recurrent disease (OR 4.56, 95%CI 1.54,13.49) or who were uncertain about their disease status (OR 2.67, 95%CI 1.23,5.79) had significantly increased odds of reporting lower QoL scores compared to those reporting remission.

Increasing physical activity was significantly associated with a 17% decrease in the odds of a lower QoL score with each additional day per week of physical activity (OR 0.83, 95%CI 0.76,0.90).

23.5% reported urinary leakage, 19.0% difficulty controlling their bowels and 19.2% had a stoma. Individuals experiencing any difficulty controlling their bowels were more than twice as likely to report lower QoL scores (OR 2.30, 95%CI 1.43,3.72). The presence of a stoma or urinary leakage was not significantly associated with QoL.

Greater difficulties with holidays and travel were reported by those with colorectal cancer compared to other cancers. For example, only 51% of colorectal respondents reporting no difficulty compared to 64% with breast or prostate cancer.

#### *Non-Hodgkin's Lymphoma (Table 3c)*

The presence of one (OR 2.16, 95%CI 1.44,3.24) or two or more (OR 7.26, 95%CI 4.51,11.69) LTCs was significantly associated with lower QoL scores. Those currently being treated (OR 2.57, 95%CI 1.52,4.33), experiencing a recurrence (OR 3.73, 95%CI 1.68,8.29) or who were not sure about their disease status (OR 3.04, 95%CI 1.58,5.84) had increased odds of reporting lower QoL scores compared to those in remission. These same factors were associated with poorer outcomes on the SDI and FACT-Lym items.

A significant positive association between increasing physical activity and QoL was seen with each additional day of physical activity reducing the odds of lower QoL score by 9% (OR 0.91, 95%CI 0.84,0.98). QoL seemed to improve with time from diagnosis for NHL but the trend was not significant ( $p=0.100$ ).

### *Prostate Cancer (Table 3d)*

The presence of two or more LTCs (OR 4.28, 95%CI 2.62,7.01) or being in the most deprived category (OR 2.57, 95%CI 1.31,5.04) were significantly associated with lower QoL scores, as well as increased social distress and difficulties identified by FACT-P.

Patients who had surgery only (compared to radiotherapy and hormone treatment) had significantly higher QoL scores (OR 0.39, 95%CI 0.21,0.71) as did those reporting more days of physical activity (OR 0.82, 95%CI 0.75,0.88).

38.5% of prostate patients reported some degree of urinary leakage, 12.9% reported difficulty controlling their bowels and 58.4% reported being unable to have an erection with a further 11% reporting significant difficulty in having or maintaining an erection. The presence of urinary leakage was significantly associated with lower QoL scores (OR 3.52, 95%CI 2.32,5.35). Erectile dysfunction and difficulty controlling bowels were not significantly associated with QoL scores.

Prostate survivors had significantly lower overall social distress scores on the SDI as well as fewer problems in all three sub-scales (everyday living, money matters, self and others) compared to other cancer types.

### *Fear of recurrence and dying*

Almost half (47.3%) of patients reported fear of recurrence and over a quarter (26.8%) reported fear of dying (Supplementary Table 5). Both of these fears decreased significantly with time since diagnosis.

### *Physical activity*

Around one-fifth (21.4%) of participants reported taking 30 minutes or more of physical activity at least five days a week (in line with the Chief Medical Officer's recommendations). This varied by cancer: 16.5% for NHL, 19.0% for breast, 20.2% for colorectal and 29.0% for prostate. Overall 29.8% of patients reported doing no physical activity; this varied by cancer

1  
2  
3 group with 33·5% of NHL, 31·5% of colorectal and 27·4% of both breast and prostate  
4 survivors doing no physical activity.  
5  
6  
7  
8  
9  
10  
11  
12  
13  
14  
15  
16  
17  
18  
19  
20  
21  
22  
23  
24  
25  
26  
27  
28  
29  
30  
31  
32  
33  
34  
35  
36  
37  
38  
39  
40  
41  
42  
43  
44  
45  
46  
47  
48  
49  
50  
51  
52  
53  
54  
55  
56  
57  
58  
59  
60

For peer review only

## Discussion

This study represents the largest European survey of survivors of multiple cancer types at clearly defined time points from diagnosis and demonstrates the feasibility of this straightforward method of collecting informative self-reported PROMS data on population-based cohorts of individuals living with and beyond a diagnosis of cancer in England. The process eliminates many of the potential biases that have hindered the collection of population-based cancer PROMS data in the past originating from the use of clinical trial data or acute service provider units for recruitment<sup>30</sup>. English cancer registries, which capture approximately 98-99% of all cancers diagnosed in England<sup>31</sup>, provide a reliable denominator population from which to identify eligible participants.

### *Acceptability and Validity*

The relatively high response rate, low level of missing data and low number of calls to the dedicated 24 hour helpline suggest that the methodology is acceptable to the majority of participants. However, the finding of lower participation amongst the elderly or those residing in areas with the greatest socio-economic deprivation would suggest that individuals from these vulnerable groups may need to be assessed by alternative methods. Whilst the questionnaires were identified as having face and content validity by a panel of health and social care professionals prior to use this study does not permit us to comment on the responsiveness or reliability of the instruments. However, the core components of the questionnaires had been identified by independent review as being reliable and appropriate for use in this setting<sup>13-15</sup>.

### *Key results*

The QoL of survivors for all four cancers was significantly related to self-reported disease status (remission versus relapse/uncertain), age and presence of LTCs. QoL appeared to either remain constant or improve slightly as time from diagnosis increased. This suggests that some problems experienced by cancer patients persist for long periods.

We have quantified the community prevalence of previously known late morbidities and assessed their impact on QoL. Problems relating to urinary and bowel control have been

1  
2  
3 shown to be common, with nearly 40% of prostate survivors reporting urinary leakage and  
4 13% difficulty controlling their bowels. Similarly, amongst colorectal survivors nearly a  
5 quarter reported urinary leakage and 19% reported difficulty controlling their bowels.  
6 These rates are comparable to other studies of cancer patients<sup>32</sup> but exceed those seen in  
7 non-cancer populations where the prevalence of urinary incontinence in adult men was  
8 4.5% overall, rising to 16.0% for over 75 year olds<sup>33</sup>. In this study, the presence of “urinary  
9 leakage” in prostate survivors and “of difficulty controlling their bowels” in colorectal  
10 survivors were significantly associated with lower QoL scores making such symptoms  
11 important to address. Erectile dysfunction in prostate survivors, though common, did not  
12 significantly impact on QoL. The finding that QoL or physical problems such as difficulty  
13 controlling bowels or incontinence do not appear to be less prevalent five years following  
14 treatment may suggest individuals are not receiving adequate help or treatment for these  
15 conditions. Greater efforts should be made in prevention and early intervention for  
16 problems resulting from cancer treatment, and directed at those most at risk of the long-  
17 term problems identified from this study.  
18  
19  
20  
21  
22  
23  
24  
25  
26  
27  
28  
29  
30

### 31 *Comparison with the General Population Data*

32 Most survivors in this study who were in remission and did not report a LTC were found to  
33 have a high QoL score. However, even the subgroup in remission with no LTC reported  
34 lower QoL scores than the data available from general population studies (Table 4). Some of  
35 this difference may be accounted for by age, as the Health Survey for England (2008)<sup>34</sup> and  
36 the General Practice Patient Survey (GPPS)<sup>35</sup> cohorts were substantially younger than the  
37 reported cancer study cohort. This assumption is supported from the HSE cohort aged over  
38 45 years (median age 63, n=7672) which reported a reduction in QoL scores (good 45%,  
39 moderate 46%, poor 9%).  
40  
41  
42  
43  
44  
45  
46  
47  
48

### 49 *Long-term Conditions*

50  
51  
52 The presence of one or more LTCs, other than their cancer diagnosis, was associated with  
53 lower QoL scores in all four cancer groups and mirrors findings from other studies<sup>2 36</sup>. The  
54 presence of multi-morbidity and LTCs identifies sub-sets of survivors who may require more  
55 active support than others. This needs to be factored into risk stratification models as  
56  
57  
58  
59  
60

1  
2  
3 health services move away from hospital based cancer follow-up towards a greater focus on  
4 self-management.  
5  
6

### 7 8 *Physical Activity* 9

10 The extent to which cancer survivors take physical activity has not previously been reported  
11 in England. The findings agree with those from the USA<sup>37</sup>, suggesting that prostate survivors  
12 are more likely than others to take moderate or vigorous physical activity. We observed an  
13 association between higher levels of activity and higher QoL scores, but it is not possible to  
14 assess from a cross-sectional survey whether there is a causal relationship.  
15  
16  
17  
18

19  
20 A smaller percentage of study respondents (21.4%) met the Chief Medical Officer of  
21 England's recommendations for physical activity when compared with the HSE(2008) in  
22 which 34% of adults met these guidelines<sup>34</sup>. Restricting the HSE data to a similar age profile  
23 as the study participants (60-75 years) saw similar levels of physical activity (23%). The HSE  
24 data found a trend of decreased physical activity with increasing age, yet, in this study,  
25 prostate survivors (the oldest subgroup) reported higher physical activity levels.  
26  
27  
28  
29  
30  
31

### 32 33 *Limitations* 34

35 The presence of multiple cancer groups and time points, along with some missing data  
36 (typically <5%), may have resulted in either a lack of power for certain analyses or type I  
37 errors (false positive results) due to the number of comparisons. For example, investigating  
38 whether the quality of life of those living with recurrent disease differed from those  
39 survivors who had been 'cured'. The non-response rate varied significantly by cancer group,  
40 deprivation category and age, which could result in selection bias when generalising results.  
41 To overcome bias associated with deprivation and age, we propose extension of the pilot  
42 study to the largest possible cohorts available nationally; analyses and interpretation of this  
43 data will be performed with maximum sensitivity to these areas.  
44  
45  
46  
47  
48  
49  
50

51  
52 Our study excluded those treated in the private sector (estimated to be under 5% of cancer  
53 cases in England<sup>38</sup>). Treatments may also have changed over the 1-5 year period used to  
54 select survivors and it is therefore possible the results reflect these changes.  
55  
56  
57  
58  
59  
60



1  
2  
3 The study relied on self-reporting of long-term conditions, response to treatment and  
4 disease status. This information was not independently verified.  
5  
6

7  
8 We also acknowledge that measures related to the FACT component are primarily intended  
9 for use around the time of treatment rather than for survivorship work. Space limitations  
10 precluded a more detailed description of results incorporating the FACT and SDI  
11 components. However, a comprehensive report including these additional findings has been  
12 compiled and can be accessed via the DH website  
13  
14  
15  
16  
17 (<https://www.wp.dh.gov.uk/publications/files/2012/12/9284-TSO-2900701-PROMS.pdf>).  
18  
19

### 20 21 *Where next for Cancer PROMS in England?*

22 The use of cancer PROMS has generally been restricted to clinical research, especially  
23 clinical trials or small studies. Whilst important work has been undertaken to develop  
24 approaches for the measurement of PROMS, they have not been incorporated into routine  
25 measurement at a whole health system level. This study demonstrates that population-  
26 based survey approaches are feasible and yield acceptable response rates. This approach  
27 could provide important insights into where improvement efforts should be targeted to  
28 reduce the long-term burden of cancer and its treatments on the growing number of cancer  
29 survivors.  
30  
31  
32  
33  
34  
35  
36

37  
38 Improving QoL in patients with LTC is one of the key goals of English government health  
39 policy (forming Domain 2 of the NHS Outcomes Framework)<sup>39</sup>. The approach we report  
40 should be scaled up and integrated within routine health outcome assessment on a national  
41 basis so that results can be distilled down to hospital/service provider level, as has been  
42 done in relation to the experience of acute care of cancer patients<sup>12</sup>. Improvements in  
43 quality of survivor care could then be driven by publishing hospital/provider level data. As a  
44 result of the findings of this pilot, a national roll-out to all individuals diagnosed 1-3 years  
45 earlier with colorectal cancer in England is being performed in January 2013. A similar roll-  
46 out to those diagnosed with prostate cancer is planned whilst pilot questionnaires for those  
47 with bladder, cervical, endometrial and ovarian cancer are being prepared. To further  
48 understand the developmental trajectory of morbidity burden, a longitudinal survey of  
49  
50  
51  
52  
53  
54  
55  
56  
57  
58  
59  
60

1  
2  
3 respondents to the pilot is being undertaken, with a survey 1 year on having been  
4 undertaken and consideration for a further data collection point after another 12 months.  
5  
6

7  
8 Our findings support the on-going international efforts to identify risk factors for poor  
9 health-related QoL outcomes following a cancer diagnosis. These include the presence of  
10 other LTCs, deprivation and limited physical activity. These, along with the high prevalence  
11 of on-going condition-specific problems such as bowel, urinary and erectile dysfunction,  
12 warrant attention by cancer services.  
13  
14  
15  
16  
17  
18  
19  
20  
21  
22  
23  
24  
25  
26  
27  
28  
29  
30  
31  
32  
33  
34  
35  
36  
37  
38  
39  
40  
41  
42  
43  
44  
45  
46  
47  
48  
49  
50  
51  
52  
53  
54  
55  
56  
57  
58  
59  
60

### *Acknowledgements*

Dr Nicola Davies, Professor Jane Maher, Dr Mick Peake, Professor Galina Velikova and Dr Penny Wright provided expert advice regarding questionnaire and study design. Thames Cancer Registry, Eastern Cancer Registry and Information Centre, and West Midlands Cancer Intelligence Unit provided information on all eligible cancer survivors. FACIT provided permission to use components of the FACT questionnaires and Penny Wright granted permission to use the Social Difficulties Inventory.

### *Funding*

This survey was funded by the Department of Health, England.

Open source access for BMJ Open was funded through a grant from Macmillan Cancer Support.

### *Declaration of Competing Interests*

All authors have completed the Unified Competing Interest form at [www.icmje.org/coi\\_disclosure.pdf](http://www.icmje.org/coi_disclosure.pdf) (available on request from the corresponding author) and declare: financial support for the submitted work from the Department of Health, England: AWG, GH and MR were employed by the Cancer Policy Team, Department of Health, England, whilst the research was carried out; AWG, LKF, RGF and EF, received financial support from Department of Health, England, to carry out the analysis of data reported; JC and MR co-chaired the Department of Health, England, Cancer Patient Experience Advisory Group.

### *Data Sharing Statement*

Statistical code and dataset are available from the corresponding author at the University of Leeds, who will provide a permanent, citable and open access home for the dataset.

### *Author Contribution Statement*

Adam Glaser contributed to the study design, data collection, data analysis, data interpretation and writing of this manuscript.

Lorna Fraser contributed to the data analysis, data interpretation and writing of this manuscript.

1  
2  
3 Jessica Corner contributed to the study design, data collection, data interpretation and  
4 writing of this manuscript.  
5

6 Richard Feltbower contributed to the data analysis, data interpretation and writing of this  
7 manuscript.  
8

9  
10 Eva Morris contributed to the data analysis, data interpretation and writing of this  
11 manuscript.  
12

13 Greg Hartwell contributed to the study design and data collection.  
14

15 Mike Richards contributed to the study design, data interpretation, and writing of this  
16 manuscript.  
17  
18

19  
20  
21 Copyright/licence for publication statement  
22

23  
24 “The Corresponding Author has the right to grant on behalf of all authors and does grant on  
25 behalf of all authors, a worldwide licence to the Publishers and its licensees in perpetuity, in  
26 all forms, formats and media (whether known now or created in the future), to i) publish,  
27 reproduce, distribute, display and store the Contribution, ii) translate the Contribution into  
28 other languages, create adaptations, reprints, include within collections and create  
29 summaries, extracts and/or, abstracts of the Contribution, iii) create any other derivative  
30 work(s) based on the Contribution, iv) to exploit all subsidiary rights in the Contribution, v)  
31 the inclusion of electronic links from the Contribution to third party material where-ever it  
32 may be located; and, vi) licence any third party to do any or all of the above.”  
33  
34  
35  
36  
37  
38  
39  
40  
41  
42  
43  
44  
45  
46  
47  
48  
49  
50  
51  
52  
53  
54  
55  
56  
57  
58  
59  
60

Table 1a Demographic data of responders and non-responders

| Characteristic                  |                             | Responders<br>(n=3300) |      | Non Responders<br>(n=1692) |      | Total<br>number<br>approached | Overall<br>Percentage<br>Responding |
|---------------------------------|-----------------------------|------------------------|------|----------------------------|------|-------------------------------|-------------------------------------|
|                                 |                             | n                      | %    | n                          | %    |                               |                                     |
| <b>Cancer<br/>Group</b>         | $\chi^2=18.8,$<br>$p<0.001$ |                        |      |                            |      |                               |                                     |
| Breast                          |                             | 854                    | 25.9 | 394                        | 23.3 | 1248                          | 68.4                                |
| Colorectal                      |                             | 802                    | 24.3 | 446                        | 26.4 | 1248                          | 64.3                                |
| NHL                             |                             | 778                    | 23.6 | 470                        | 27.8 | 1248                          | 62.3                                |
| Prostate                        |                             | 866                    | 26.2 | 382                        | 22.5 | 1248                          | 69.4                                |
| <b>Age</b>                      | $\chi^2=108,$<br>$p<0.001$  |                        |      |                            |      |                               |                                     |
| under 55                        |                             | 467                    | 14.2 | 282                        | 16.7 | 749                           | 62.3                                |
| 55 to 64                        |                             | 692                    | 21.0 | 335                        | 19.8 | 1027                          | 67.4                                |
| 65 to 74                        |                             | 1,108                  | 33.6 | 414                        | 24.5 | 1522                          | 72.8                                |
| 75 to 84                        |                             | 835                    | 25.3 | 434                        | 25.6 | 1269                          | 65.8                                |
| 85+                             |                             | 198                    | 6.0  | 227                        | 13.4 | 425                           | 46.6                                |
| <b>IMD<br/>Category</b>         | $\chi^2=55.9,$<br>$p<0.001$ |                        |      |                            |      |                               |                                     |
| 1 least<br>deprived             |                             | 826                    | 25.0 | 331                        | 19.6 | 1157                          | 71.4                                |
| 2                               |                             | 812                    | 24.6 | 357                        | 21.1 | 1169                          | 69.5                                |
| 3                               |                             | 703                    | 21.3 | 349                        | 20.7 | 1052                          | 66.8                                |
| 4                               |                             | 554                    | 16.8 | 352                        | 20.7 | 906                           | 61.1                                |
| 5 most<br>deprived              |                             | 399                    | 12.1 | 300                        | 17.7 | 699                           | 57.1                                |
| Missing                         |                             | 6                      | 0.2  | 3                          | 0.2  | 9                             | 66.7                                |
| <b>Time since<br/>Diagnosis</b> | $\chi^2=4.1,$<br>$p=0.25$   |                        |      |                            |      |                               |                                     |
| 1 year                          |                             | 848                    | 25.7 | 400                        | 23.6 | 1248                          | 67.9                                |
| 2 years                         |                             | 834                    | 25.3 | 414                        | 24.5 | 1248                          | 66.8                                |
| 3 years                         |                             | 806                    | 24.4 | 442                        | 26.1 | 1248                          | 64.6                                |
| 5 years                         |                             | 812                    | 24.6 | 436                        | 25.8 | 1248                          | 65.1                                |

Table 1b. Demographic Data by Cancer Group

| Characteristic                         |                               | Breast<br>(n=854) |      | Colorectal<br>(n=802) |      | Non Hodgkin's<br>Lymphoma<br>(n=778) |      | Prostate<br>(n=866) |      | Total<br>(n=3300) |      |
|----------------------------------------|-------------------------------|-------------------|------|-----------------------|------|--------------------------------------|------|---------------------|------|-------------------|------|
|                                        |                               | n                 | %    | n                     | %    | n                                    | %    | n                   | %    | n                 | %    |
| Sex                                    | $\chi^2=1700$ ,<br>$p<0.001$  |                   |      |                       |      |                                      |      |                     |      |                   |      |
| Male                                   |                               | 10                | 1.2  | 435                   | 54.2 | 419                                  | 53.9 | 848                 | 97.9 | 1712              | 51.9 |
| Female                                 |                               | 829               | 97.0 | 348                   | 43.4 | 352                                  | 45.2 | 0                   | 0    | 1529              | 46.3 |
| Missing                                |                               | 15                | 1.8  | 19                    | 2.4  | 7                                    | 0.9  | 18                  | 2.1  | 59                | 1.8  |
| Age                                    | $\chi^2=401$ ,<br>$p<0.001$   |                   |      |                       |      |                                      |      |                     |      |                   |      |
| under 55                               |                               | 231               | 27.0 | 57                    | 7.1  | 157                                  | 20.2 | 157                 | 18.1 | 467               | 14.2 |
| 55 to 64                               |                               | 237               | 27.8 | 136                   | 17.0 | 173                                  | 22.2 | 173                 | 20.0 | 692               | 21.0 |
| 65 to 74                               |                               | 224               | 26.2 | 280                   | 34.9 | 238                                  | 30.6 | 238                 | 27.5 | 1,108             | 33.6 |
| 75 to 84                               |                               | 122               | 14.3 | 246                   | 30.7 | 175                                  | 22.5 | 175                 | 20.2 | 835               | 25.3 |
| 85+                                    |                               | 40                | 4.7  | 83                    | 10.3 | 35                                   | 4.5  | 35                  | 4.0  | 198               | 6.0  |
| Ethnicity                              | $\chi^2=74.6$ ,<br>$p<0.001$  |                   |      |                       |      |                                      |      |                     |      |                   |      |
| White                                  |                               | 768               | 89.9 | 740                   | 92.3 | 688                                  | 88.4 | 786                 | 90.8 | 2982              | 90.4 |
| Asian                                  |                               | 35                | 4.1  | 19                    | 2.3  | 30                                   | 3.9  | 15                  | 1.7  | 99                | 3.0  |
| Black                                  |                               | 14                | 1.6  | 11                    | 1.4  | 21                                   | 2.7  | 36                  | 4.2  | 82                | 2.5  |
| Mixed                                  |                               | 4                 | 0.5  | 5                     | 0.6  | 6                                    | 0.8  | 1                   | 0.1  | 16                | 0.5  |
| Other                                  |                               | 4                 | 0.5  | 0                     | 0    | 4                                    | 0.5  | 3                   | 0.3  | 11                | 0.3  |
| Missing                                |                               | 29                | 3.4  | 27                    | 3.4  | 29                                   | 3.7  | 25                  | 2.9  | 110               | 3.3  |
| IMD<br>Category                        | $\chi^2=4.3$ ,<br>$p=0.97$    |                   |      |                       |      |                                      |      |                     |      |                   |      |
| 1 least<br>deprived                    |                               | 211               | 24.7 | 198                   | 24.7 | 202                                  | 26.0 | 215                 | 24.8 | 826               | 25.0 |
| 2                                      |                               | 210               | 24.6 | 199                   | 24.8 | 183                                  | 23.5 | 220                 | 25.4 | 812               | 24.6 |
| 3                                      |                               | 184               | 21.5 | 159                   | 19.8 | 177                                  | 22.7 | 183                 | 21.1 | 703               | 21.3 |
| 4                                      |                               | 141               | 16.5 | 147                   | 18.3 | 125                                  | 16.1 | 141                 | 16.3 | 554               | 16.8 |
| 5 most<br>deprived                     |                               | 104               | 12.2 | 98                    | 12.2 | 91                                   | 11.7 | 106                 | 12.2 | 399               | 12.1 |
| Missing                                |                               | 4                 | 0.5  | 1                     | 0.1  | 0                                    | 0    | 1                   | 0.1  | 6                 | 0.2  |
| Time since<br>Diagnosis                | $\chi^2=5.5$ ,<br>$p=0.78$    |                   |      |                       |      |                                      |      |                     |      |                   |      |
| 1 year                                 |                               | 215               | 25.2 | 202                   | 25.2 | 197                                  | 25.3 | 234                 | 27.0 | 848               | 25.7 |
| 2 years                                |                               | 212               | 24.8 | 215                   | 26.8 | 187                                  | 24.0 | 220                 | 25.4 | 834               | 25.3 |
| 3 years                                |                               | 204               | 23.9 | 195                   | 24.3 | 207                                  | 26.6 | 200                 | 23.1 | 806               | 24.4 |
| 5 years                                |                               | 223               | 26.1 | 190                   | 23.7 | 187                                  | 24.0 | 212                 | 24.5 | 812               | 24.6 |
| Other Long<br>Term Health<br>Condition | $\chi^2=12.1$ ,<br>$p=0.06$   |                   |      |                       |      |                                      |      |                     |      |                   |      |
| Yes                                    |                               | 435               | 50.9 | 432                   | 53.9 | 435                                  | 55.9 | 501                 | 57.9 | 1803              | 54.6 |
| No                                     |                               | 353               | 41.3 | 309                   | 38.5 | 287                                  | 36.9 | 299                 | 34.5 | 1248              | 37.8 |
| Don't Know                             |                               | 30                | 6.9  | 23                    | 2.9  | 33                                   | 4.2  | 27                  | 3.1  | 113               | 3.4  |
| Missing                                |                               | 36                | 4.2  | 38                    | 4.7  | 23                                   | 3.0  | 39                  | 4.5  | 136               | 4.1  |
| Disease<br>Status                      | $\chi^2=390.0$ ,<br>$p<0.001$ |                   |      |                       |      |                                      |      |                     |      |                   |      |
| Remission                              |                               | 677               | 79.3 | 625                   | 77.9 | 526                                  | 67.6 | 399                 | 46.1 | 2227              | 67.5 |
| Rx but<br>present                      |                               | 26                | 3.0  | 32                    | 4.0  | 81                                   | 10.4 | 144                 | 16.6 | 283               | 8.6  |
| Not treated                            |                               | 4                 | 0.5  | 6                     | 0.7  | 43                                   | 5.5  | 78                  | 9.0  | 131               | 4.0  |

|                   |  |    |     |    |     |    |     |     |      |     |     |
|-------------------|--|----|-----|----|-----|----|-----|-----|------|-----|-----|
| <b>Recurrence</b> |  | 30 | 3.5 | 20 | 2.5 | 30 | 3.9 | 8   | 0.9  | 88  | 2.6 |
| <b>Not sure</b>   |  | 58 | 6.8 | 69 | 8.6 | 53 | 6.8 | 140 | 16.2 | 320 | 9.7 |
| <b>Missing</b>    |  | 59 | 6.9 | 50 | 6.2 | 45 | 5.8 | 97  | 11.2 | 251 | 7.6 |

For peer review only

Table 2. EQ5D outcome category by cancer sub-group

| EQ5D Categories                  | 'High' QoL<br>(Scores=1) |      | Medium QoL<br>(0.5≤Scores<1) |      | Low QoL<br>(Scores<0.5) |      | Missing |     |
|----------------------------------|--------------------------|------|------------------------------|------|-------------------------|------|---------|-----|
|                                  | n                        | %    | n                            | %    | n                       | %    | n       | %   |
| <b>Breast</b>                    | 208                      | 24.4 | 514                          | 60.2 | 76                      | 8.9  | 56      | 6.6 |
| <b>Colorectal</b>                | 255                      | 31.2 | 434                          | 54.1 | 87                      | 10.8 | 26      | 3.2 |
| <b>Non Hodgkins<br/>Lymphoma</b> | 247                      | 31.7 | 398                          | 51.2 | 102                     | 13.1 | 31      | 4.0 |
| <b>Prostate</b>                  | 347                      | 40.0 | 390                          | 45.0 | 81                      | 9.4  | 48      | 5.5 |
| <b>Total</b>                     | 1057                     | 32.0 | 1736                         | 52.6 | 346                     | 10.5 | 161     | 4.9 |

For peer review only



Table 3a. Ordered Logistic Regression Model EQ5D in Breast Cancer Patients [n=709, pseudoR<sup>2</sup>=0.16  
p<0.001]

| Characteristic                       | Odds Ratio* | 95% CI |       | P value |
|--------------------------------------|-------------|--------|-------|---------|
| <b>Age (years)</b>                   |             |        |       |         |
| <55 years                            | REF         |        |       |         |
| 55-64                                | 0.69        | 0.45   | 1.06  | 0.09    |
| 65-74                                | 0.36        | 0.22   | 0.58  | <0.001  |
| 75-84                                | 0.59        | 0.32   | 1.08  | 0.09    |
| 85+                                  | 1.61        | 0.57   | 4.52  | 0.36    |
| <b>Deprivation</b>                   |             |        |       |         |
| 1 least deprived                     | REF         |        |       |         |
| 2                                    | 1.03        | 0.66   | 1.62  | 0.88    |
| 3                                    | 1.10        | 0.68   | 1.77  | 0.71    |
| 4                                    | 0.93        | 0.55   | 1.56  | 0.78    |
| 5 most deprived                      | 3.00        | 1.64   | 5.50  | <0.001  |
| <b>Physical Activity†</b>            | 0.88        | 0.82   | 0.95  | <0.001  |
| <b>Number of other LTC (excl BP)</b> |             |        |       |         |
| 0                                    | REF         |        |       |         |
| 1                                    | 1.84        | 1.25   | 2.70  | 0.002   |
| 2+                                   | 7.30        | 4.45   | 11.93 | <0.001  |
| <b>Treatment*</b>                    |             |        |       |         |
| Radio+Chemo+Surgery+Hormone          | REF         |        |       |         |
| Radio +Chemo+Surgery                 | 0.67        | 0.38   | 1.20  | 0.18    |
| Radio+Surgery                        | 0.51        | 0.29   | 0.90  | 0.02    |
| Radio+Surgery+Hormone                | 0.56        | 0.33   | 0.96  | 0.04    |
| Surgery only                         | 1.00        | 0.55   | 1.84  | 0.99    |
| Other                                | 0.92        | 0.53   | 1.58  | 0.76    |
| <b>Ethnicity</b>                     |             |        |       |         |
| White                                | REF         |        |       |         |
| Mixed                                | 0.50        | 0.06   | 4.29  | 0.53    |
| Asian                                | 1.96        | 0.77   | 5.01  | 0.16    |
| Black                                | 0.29        | 0.08   | 0.98  | 0.05    |
| Other                                | 2.20        | 0.17   | 29.32 | 0.55    |
| <b>Disease Status</b>                |             |        |       |         |
| Remission                            | REF         |        |       |         |
| Rx but present                       | 1.49        | 0.56   | 3.93  | 0.43    |
| Not treated                          | .           | .      | .     | .       |
| Recurrence                           | 4.70        | 1.92   | 11.52 | 0.001   |
| Not sure                             | 2.51        | 1.27   | 4.96  | 0.008   |
| <b>Time since Diagnosis</b>          |             |        |       |         |
| 1 year                               | REF         |        |       |         |
| 2 years                              | 1.02        | 0.64   | 1.62  | 0.95    |
| 3 years                              | 0.88        | 0.55   | 1.41  | 0.60    |
| 5 years                              | 0.93        | 0.59   | 1.47  | 0.76    |

\*Odds of reporting 'medium' or 'low' QoL EQ5D scores compared to 'high' QoL scores where 'high', 'medium' and 'low' QoL was defined as scores=1,  $0.5 \leq \text{scores} < 1$  and scores<0.5 respectively.

†Amount of physical activity performed each week quantified according to the Chief Medical Officer of England's recommendations<sup>16</sup>

Table 3b. Ordered Logistic Regression Model EQ5D in Colorectal Patients [n=485, pseudoR2=0.18, p&lt;0.001]

| Characteristic                       | Odds Ratio | 95% CI |       | P value |
|--------------------------------------|------------|--------|-------|---------|
| <b>Age (years)</b>                   |            |        |       |         |
| <55 years                            | REF        |        |       |         |
| 55-64                                | 1.28       | 0.59   | 2.75  | 0.53    |
| 65-74                                | 1.16       | 0.57   | 2.35  | 0.69    |
| 75-84                                | 1.23       | 0.57   | 2.64  | 0.59    |
| 85+                                  | 2.45       | 0.93   | 6.41  | 0.07    |
| <b>Sex</b>                           |            |        |       |         |
| Male                                 | REF        |        |       |         |
| Female                               | 1.22       | 0.81   | 1.82  | 0.34    |
| <b>Deprivation</b>                   |            |        |       |         |
| 1 least deprived                     | REF        |        |       |         |
| 2                                    | 0.83       | 0.48   | 1.43  | 0.50    |
| 3                                    | 0.57       | 0.33   | 1.00  | 0.05    |
| 4                                    | 0.62       | 0.34   | 1.13  | 0.12    |
| 5 most deprived                      | 1.17       | 0.58   | 2.34  | 0.66    |
| <b>Physical Activity†</b>            | 0.83       | 0.76   | 0.90  | <0.001  |
| <b>Number of other LTC(excl BP)</b>  |            |        |       |         |
| 0                                    | REF        |        |       |         |
| 1                                    | 2.09       | 1.29   | 3.37  | <0.001  |
| 2+                                   | 4.83       | 2.85   | 8.21  | <0.001  |
| <b>Treatment*</b>                    |            |        |       |         |
| Surgery only                         | REF        |        |       |         |
| Radio+Chemo+Surgery                  | 1.15       | 0.60   | 2.21  | 0.67    |
| Chemo+Surgery                        | 1.35       | 0.85   | 2.17  | 0.21    |
| Other                                | 1.58       | 0.77   | 3.22  | 0.21    |
| <b>Ethnicity</b>                     |            |        |       |         |
| White                                | REF        |        |       |         |
| Mixed                                | 1.72       | 0.24   | 12.42 | 0.59    |
| Asian                                | 1.99       | 0.46   | 8.54  | 0.36    |
| Black                                | 1.14       | 0.26   | 4.92  | 0.86    |
| Other                                | 1.72       | 0.24   | 12.42 | 0.59    |
| <b>Disease Status</b>                |            |        |       |         |
| Remission                            | REF        |        |       |         |
| Rx but present                       | 7.03       | 2.44   | 20.21 | <0.001  |
| Not treated                          | 0.16       | 0.01   | 2.63  | 0.20    |
| Recurrence                           | 4.56       | 1.54   | 13.49 | 0.01    |
| Not sure                             | 2.67       | 1.23   | 5.79  | 0.01    |
| <b>Stoma</b>                         |            |        |       |         |
| No                                   | REF        |        |       |         |
| Yes                                  | 1.32       | 0.80   | 2.19  | 0.27    |
| <b>Difficulty Controlling Bowels</b> |            |        |       |         |
| No                                   | REF        |        |       |         |
| Yes                                  | 2.30       | 1.43   | 3.72  | <0.001  |
| <b>Leak Urine</b>                    |            |        |       |         |
| No                                   | REF        |        |       |         |
| Yes                                  | 1.41       | 0.87   | 2.30  | 0.16    |
| <b>Time since Diagnosis</b>          |            |        |       |         |
| 1 year                               | REF        |        |       |         |
| 2 years                              | 0.72       | 0.42   | 1.22  | 0.22    |
| 3 years                              | 1.03       | 0.59   | 1.81  | 0.92    |
| 5 years                              | 0.85       | 0.49   | 1.48  | 0.56    |

1  
2  
3 \*Odds of reporting 'medium' or 'low' QoL EQ5D scores compared to 'high' QoL scores where 'high', 'medium'  
4 and 'low' QoL was defined as scores=1,  $0.5 \leq \text{scores} < 1$  and  $\text{scores} < 0.5$  respectively.  
5

6 †Amount of physical activity performed each week quantified according to the Chief Medical Officer of  
7 England's recommendations<sup>16</sup>  
8  
9  
10  
11  
12  
13  
14  
15  
16  
17  
18  
19  
20  
21  
22  
23  
24  
25  
26  
27  
28  
29  
30  
31  
32  
33  
34  
35  
36  
37  
38  
39  
40  
41  
42  
43  
44  
45  
46  
47  
48  
49  
50  
51  
52  
53  
54  
55  
56  
57  
58  
59  
60

For peer review only

Table 3c. Ordered Logistic Regression Model EQ5D in NHL Patients [n=614, pseudoR2=0.15 p&lt;0.001]

| Characteristic                            | Odds Ratio | 95% CI |       | P value |
|-------------------------------------------|------------|--------|-------|---------|
| <b>Age (years)</b>                        |            |        |       |         |
| <55 years                                 | REF        |        |       |         |
| 55-64                                     | 0.89       | 0.55   | 1.45  | 0.65    |
| 65-74                                     | 1.23       | 0.75   | 1.99  | 0.41    |
| 75-84                                     | 1.60       | 0.94   | 2.73  | 0.08    |
| 85+                                       | 2.13       | 0.84   | 5.39  | 0.11    |
| <b>Sex</b>                                |            |        |       |         |
| Male                                      | REF        |        |       |         |
| Female                                    | 1.25       | 0.89   | 1.74  | 0.19    |
| <b>Deprivation</b>                        |            |        |       |         |
| 1 least deprived                          | REF        |        |       |         |
| 2                                         | 1.06       | 0.67   | 1.69  | 0.80    |
| 3                                         | 1.21       | 0.75   | 1.95  | 0.43    |
| 4                                         | 1.64       | 0.97   | 2.76  | 0.07    |
| 5 most deprived                           | 1.19       | 0.65   | 2.21  | 0.57    |
| Physical Activity†                        | 0.91       | 0.84   | 0.98  | 0.01    |
| <b>Number of other LTC (excluding BP)</b> |            |        |       |         |
| 0                                         | REF        |        |       |         |
| 1                                         | 2.16       | 1.44   | 3.24  | <0.001  |
| 2+                                        | 7.26       | 4.51   | 11.69 | <0.001  |
| <b>Treatment*</b>                         |            |        |       |         |
| Chemo only                                | REF        |        |       |         |
| Radio+Chemo                               | 0.81       | 0.47   | 1.41  | 0.46    |
| Chemo + Antibody                          | 0.93       | 0.55   | 1.59  | 0.80    |
| Radio+Chemo+Other                         | 1.55       | 0.87   | 2.77  | 0.14    |
| Other                                     | 0.96       | 0.63   | 1.46  | 0.86    |
| <b>Ethnicity</b>                          |            |        |       |         |
| White                                     | REF        |        |       |         |
| Mixed                                     | 2.78       | 0.28   | 27.7  | 0.38    |
| Asian                                     | 0.68       | 0.29   | 1.59  | 0.38    |
| Black                                     | 0.91       | 0.33   | 2.49  | 0.85    |
| Other                                     | 0.61       | 0.09   | 4.39  | 0.62    |
| <b>Disease Status</b>                     |            |        |       |         |
| Remission                                 | REF        |        |       |         |
| Rx but present                            | 2.57       | 1.52   | 4.33  | <0.001  |
| Not treated                               | 0.83       | 0.17   | 3.96  | 0.82    |
| Recurrence                                | 3.73       | 1.68   | 8.29  | 0.001   |
| Not sure                                  | 3.04       | 1.58   | 5.84  | 0.001   |
| <b>Time since Diagnosis</b>               |            |        |       |         |
| 1 year                                    | REF        |        |       |         |
| 2 years                                   | 0.62       | 0.38   | 0.99  | 0.05    |
| 3 years                                   | 0.60       | 0.38   | 0.96  | 0.03    |
| 5 years                                   | 0.57       | 0.36   | 0.90  | 0.02    |

\*Odds of reporting 'medium' or 'low' QoL EQ5D scores compared to 'high' QoL scores where 'high', 'medium' and 'low' QoL was defined as scores=1,  $0.5 \leq \text{scores} < 1$  and  $\text{scores} < 0.5$  respectively.

†Amount of physical activity performed each week quantified according to the Chief Medical Officer of England's recommendations<sup>16</sup>

Table 3d. Ordered Logistic Regression Model EQ5D in Prostate Patients [n=524, pseudoR2=0.22 p&lt;0.001]

| Characteristic                       | Odds Ratio | 95% CI |        | P value |
|--------------------------------------|------------|--------|--------|---------|
| <b>Age (years)</b>                   |            |        |        |         |
| <55 years                            | REF        |        |        |         |
| 55-64                                | 1.32       | 0.41   | 4.30   | 0.64    |
| 65-74                                | 1.72       | 0.55   | 5.38   | 0.36    |
| 75-84                                | 1.32       | 0.41   | 4.30   | 0.64    |
| 85+                                  | 1.92       | 0.42   | 8.78   | 0.40    |
| <b>Deprivation</b>                   |            |        |        |         |
| 1 least deprived                     | REF        |        |        |         |
| 2                                    | 1.09       | 0.64   | 1.85   | 0.74    |
| 3                                    | 1.19       | 0.68   | 2.08   | 0.55    |
| 4                                    | 1.61       | 0.88   | 2.95   | 0.13    |
| 5 most deprived                      | 2.57       | 1.31   | 5.04   | 0.01    |
| Physical Activity†                   | 0.82       | 0.75   | 0.88   | <0.001  |
| <b>Number of other LTC(excl BP)</b>  |            |        |        |         |
| 0                                    | REF        |        |        |         |
| 1                                    | 1.55       | 0.94   | 2.54   | 0.09    |
| 2+                                   | 4.28       | 2.62   | 7.01   | <0.001  |
| <b>Treatment*</b>                    |            |        |        |         |
| Radio+Hormone                        | REF        |        |        |         |
| Surgery only                         | 0.39       | 0.21   | 0.71   | <0.001  |
| Hormone only                         | 1.68       | 0.85   | 3.33   | 0.14    |
| Radio only                           | 0.94       | 0.53   | 1.66   | 0.83    |
| Active surveillance only             | 1.16       | 0.47   | 2.88   | 0.75    |
| Other                                | .          | .      | .      | .       |
| <b>Ethnicity</b>                     |            |        |        |         |
| White                                | REF        |        |        |         |
| Mixed                                | 3.82       | 0.07   | 203.44 | 0.51    |
| Asian                                | 3.21       | 0.56   | 18.49  | 0.19    |
| Black                                | 2.54       | 0.96   | 6.73   | 0.06    |
| Other                                | 0.00       | 0.00   | .      | 0.98    |
| <b>Disease Status</b>                |            |        |        |         |
| Remission                            | REF        |        |        |         |
| Rx but present                       | 1.75       | 0.94   | 3.26   | 0.08    |
| Not treated                          | 1.06       | 0.37   | 3.05   | 0.91    |
| Recurrence                           | 1.71       | 0.17   | 16.91  | 0.65    |
| Not sure                             | 1.48       | 0.85   | 2.58   | 0.17    |
| <b>Urinary Leakage</b>               |            |        |        |         |
| No                                   | REF        |        |        |         |
| Yes                                  | 3.52       | 2.32   | 5.35   | <0.001  |
| <b>Erectile Dysfunction</b>          |            |        |        |         |
| No                                   | REF        |        |        |         |
| Yes                                  | 1.46       | 0.96   | 2.23   | 0.08    |
| <b>Difficulty Controlling Bowels</b> |            |        |        |         |
| No                                   | REF        |        |        |         |
| Yes                                  | 1.62       | 0.90   | 2.92   | 0.10    |
| <b>Time since Diagnosis</b>          |            |        |        |         |
| 1 year                               | REF        |        |        |         |
| 2 years                              | 0.83       | 0.50   | 1.40   | 0.49    |
| 3 years                              | 0.80       | 0.47   | 1.36   | 0.41    |
| 5 years                              | 0.77       | 0.45   | 1.33   | 0.36    |

1  
2  
3  
4  
5  
6  
7  
8  
9  
10  
11  
12  
13  
14  
15  
16  
17  
18  
19  
20  
21  
22  
23  
24  
25  
26  
27  
28  
29  
30  
31  
32  
33  
34  
35  
36  
37  
38  
39  
40  
41  
42  
43  
44  
45  
46  
47  
48  
49  
50  
51  
52  
53  
54  
55  
56  
57  
58  
59  
60

\*Odds of reporting 'medium' or 'low' QoL EQ5D scores compared to 'high' QoL scores where 'high', 'medium' and 'low' QoL was defined as scores=1,  $0.5 \leq \text{scores} < 1$  and  $\text{scores} < 0.5$  respectively.

†Amount of physical activity performed each week quantified according to the Chief Medical Officer of England's recommendations<sup>16</sup>

For peer review only

**Table 4. Comparison of Quality of Life scores with other population data**

|                                 | Health Survey for England (HSE 2008) <sup>34</sup> |                 | GP Population Survey (GPPS) <sup>35</sup> | GP Population Survey (GPPS) <sup>35</sup> | This survey |                          |
|---------------------------------|----------------------------------------------------|-----------------|-------------------------------------------|-------------------------------------------|-------------|--------------------------|
|                                 | All ages                                           | Ages ≥ 45 years | All                                       | No LTC                                    | All         | In remission with no LTC |
| Number of respondents           | 14116                                              | 7672            | 426933                                    | 193285                                    | 3300        | 848                      |
| Median age                      | 48                                                 | 63              | 48                                        | 39                                        | 69.3        | 63.2                     |
| 'High' QOL (Scores=1)           | 56.0%                                              | 45.4%           | 50.6%                                     | 73.8%                                     | 32.0%       | 51.4%                    |
| 'Medium' QOL (0.5 ≤ Scores < 1) | 37.7%                                              | 45.6%           | 41.6%                                     | 25.2%                                     | 52.6%       | 44.3%                    |
| 'Low' QOL (Scores < 0.5)        | 6.3%                                               | 9.0%            | 7.8%                                      | 0.9%                                      | 10.5%       | 2.1%                     |

1  
2  
3  
4  
5  
6  
7  
8  
9  
10  
11  
12  
13  
14  
15  
16  
17  
18  
19  
20  
21  
22  
23  
24  
25  
26  
27  
28  
29  
30  
31  
32  
33  
34  
35  
36  
37  
38  
39  
40  
41  
42  
43  
44  
45  
46  
47  
48  
49  
50  
51  
52  
53  
54  
55  
56  
57  
58  
59  
60

For peer review only



## References

1. Maddams J, Brewster D, Gavin A, et al. Cancer prevalence in the United Kingdom: estimates for 2008. *British Journal of Cancer* 2009;101(3):541-47.
2. Elliott J, Fallows A, Staetsky L, et al. The health and well-being of cancer survivors in the UK: findings from a population-based survey. *British Journal of Cancer* 2011;105:S11-S20.
3. Lipscomb J, Gotay CC, Snyder CE. Patient-reported outcomes in cancer: A review of recent research and policy initiatives. *CA-a Cancer Journal for Clinicians* 2007;57(5):278-300.
4. Richards M, Corner J, Maher J. The National Cancer Survivorship Initiative: new and emerging evidence on the ongoing needs of cancer survivors. *British Journal of Cancer* 2011;105:S1-S4.
5. Garcia SF, Cella D, Clauser SB, et al. Standardizing patient-reported outcomes assessment in cancer clinical trials: A patient-reported outcomes measurement information system initiative. *Journal of Clinical Oncology* 2007;25(32):5106-12.
6. Bode RK, Hahn EA, DeVellis R, et al. Measuring Participation: The Patient-Reported Outcomes Measurement Information System Experience. *Archives of Physical Medicine and Rehabilitation* 2010;91(9):S60-S65.
7. van de Poll-Franse LV, Horevoorts N, van Eenbergen M, et al. The Patient Reported Outcomes Following Initial treatment and Long term Evaluation of Survivorship registry: Scope, rationale and design of an infrastructure for the study of physical and psychosocial outcomes in cancer survivorship cohorts. *European Journal of Cancer* 2011;47(14):2188-94.
8. Den Oudsten BL, Traa MJ, Thong MSY, et al. Higher prevalence of sexual dysfunction in colon and rectal cancer survivors compared with the normative population: A population-based study. *European Journal of Cancer* 2012; 48(17):3161-70.
9. Hoffman RM, Hunt WC, Gilliland FD, et al. Patient satisfaction with treatment decisions for clinically localized prostate carcinoma. Results from the prostate cancer outcomes study. *Cancer* 2003;97(7):1653-62.
10. Potosky AL, Davis WW, Hoffman RM, et al. Five-year outcomes after prostatectomy or radiotherapy for prostate cancer: The prostate cancer outcomes study. *Journal of the National Cancer Institute* 2004;96(18):1358-67.
11. Ayanian JZ, Zaslavsky AM, Arora NK, et al. Patients' Experiences With Care for Lung Cancer and Colorectal Cancer: Findings From the Cancer Care Outcomes Research and Surveillance Consortium. *Journal of Clinical Oncology* 2010;28(27):4154-61.
12. Department of Health. National Cancer Patient Experience Survey Programme - 2010 National Survey Report, 2010.
13. Davies N, Gibbons E, Mackintosh A, et al. A Structured Review of Patient Reported Outcomes Measures (PROMS) for Breast Cancer, Report to the Department of Health. In: Patient Reported Outcomes Measurement Group, editor. Oxford, 2009.
14. Morris C, Gibbons E, Fitzpatrick R. A Structured Review of Patient Reported Outcome Measures (PROMS) for Prostate Cancer, Report to the Department of Health. In: Patient-Reported Outcomes Measurement Group, editor. Oxford, 2009.
15. Hadi M, Gibbons E, Fitzpatrick R. A Structured Review of Patient Reported Outcome Measures (PROMS) for Colorectal Cancer, Report to the Department of Health. In: Group PROM, editor. Oxford, 2009.

16. Department of Health. Start Active, Stay Active: A report on physical activity from the four home countries' Chief Medical Officers London, 2011.
17. The EuroQol Group. EuroQol-a new facility for the measurement of health-related quality of life. *Health Policy* 1990;16(3):199-208.
18. Herdman M, Gudex C, Lloyd A, et al. Development and preliminary testing of the new five-level version of EQ-5D (EQ-5D-5L). *Quality of Life Research* 2011;20:1727-36.
19. Wright EP, Kiely M, Johnston C, et al. Development and evaluation of an instrument to assess social difficulties in routine oncology practice. *Quality of Life Research* 2005;14(2):373-86.
20. Wright P, Smith A, Brown S, et al. Measuring social difficulties: Clinical meaning and utility of the Social Difficulties Inventory (SDI). *Psycho-Oncology* 2006;15(2):S436-S37.
21. Wright P, Smith AB, Keding A, et al. The Social Difficulties Inventory (SDI): development of subscales and scoring guidance for staff. *Psycho-Oncology* 2011;20(1):36-43.
22. Sheldon H, Sizmur S. An evaluation of the National Cancer Survivorship Initiative test community projects: Picker Institute Europe, 2010.
23. Girgis A, Lambert S, Lecathelinais C. The supportive care needs survey for partners and caregivers of cancer survivors: development and psychometric evaluation. *Psycho-Oncology* 2011;20(4):387-93.
24. Ashley L, Jones H, Thomas J, et al. Integrating cancer survivors' experiences into UK cancer registries: design and development of the ePOCS system (electronic Patient-reported Outcomes from Cancer Survivors). *British Journal of Cancer* 2011;105:S74-S81.
25. Webster K, Cella D, Yost K. The Functional Assessment of Chronic Illness Therapy (FACIT) Measurement System: properties, applications, and interpretation. *Health and Quality of Life Outcomes*. 2003;1:79.
26. Department for Communities and Local Government. English Indices of Multiple Deprivation 2010: Crown copyright, 2011.
27. van Hout B, Janssen MF, Feng Y-S, Kohlmann T, Busschbach J, Golicki D, Lloyd A, Scalone L, Kind P, Pickard AS. Interim Scoring for the EQ-5D-5L: Mapping the EQ-5D-5L to EQ-5D-3L Value Sets. *Value in Health* 2012;15:708-715..
28. Judd CM, McLelland GH, Ryan CS. *Data Analysis: A Model Comparison Approach*. Second ed: Routledge, 2008.
29. National Research Ethics Service. Differentiating audit, service evaluation and research version 1.1, 2006. Available via <http://www.nres.nhs.uk/EasysiteWeb/getresource.axd?AssetID=340&type=full&servicetype=Attachment>; last accessed 22 January 2013.
30. Ganz PA, Land SR, Antonio C, et al. Cancer survivorship research: the challenge of recruiting adult long term cancer survivors from a cooperative clinical trials group. *Journal of Cancer Survivorship-Research and Practice* 2009;3(3):137-47.
31. Moller H, Richards S, Hanchett N, et al. Completeness of case ascertainment and survival time error in English cancer registries: impact on 1-year survival estimates. *British Journal of Cancer* 2011;105(1):170-76.
32. King MT, Viney R, Smith DP, et al. Survival gains needed to offset persistent adverse treatment effects in localised prostate cancer. *British Journal of Cancer* 2012;106(4):638-45.

- 1  
2  
3 33. Markland AD, Goode PS, Redden DT, et al. Prevalence of Urinary Incontinence in Men:  
4 Results From the National Health and Nutrition Examination Survey. *Journal of*  
5 *Urology* 2010;184(3):1022-27.  
6  
7 34. Craig R, Mindell J, Hirani V, editors. Health Survey for England 2008. London: National  
8 Centre of Social Research; 2009. (Series HS no. 18)..  
9  
10 35. Department of Health. The GP Patient Survey, 2012. Available via [http://www.gp-](http://www.gp-patient.co.uk/results)  
11 [patient.co.uk/results](http://www.gp-patient.co.uk/results); last accessed 22 January 2013.  
12  
13 36. Eakin EG, Youlden DR, Baade PD, et al. Health status of long-term cancer survivors:  
14 Results from an Australian population-based sample. *Cancer Epidemiology*  
15 *Biomarkers & Prevention* 2006;15(10):1969-76.  
16  
17 37. Kenfield SA, Stampfer MJ, Giovannucci E, et al. Physical Activity and Survival After  
18 Prostate Cancer Diagnosis in the Health Professionals Follow-Up Study. *Journal of*  
19 *Clinical Oncology* 2011;29(6):726-32.  
20  
21 38. Barbieri JM, Greenberg DC, Wright KA, et al. The association of diagnosis in the private  
22 or NHS sector on prostate cancer stage and treatment. *Journal of Public Health*  
23 2012;34(1):108-14.  
24  
25 39. Department of Health. NHS Outcomes Framework 2012-13, 2011. Available via  
26 [https://www.wp.dh.gov.uk/publications/files/2012/11/121109-NHS-Outcomes-](https://www.wp.dh.gov.uk/publications/files/2012/11/121109-NHS-Outcomes-Framework-2013-14.pdf)  
27 [Framework-2013-14.pdf](https://www.wp.dh.gov.uk/publications/files/2012/11/121109-NHS-Outcomes-Framework-2013-14.pdf);  
28  
29  
30  
31  
32  
33  
34  
35  
36  
37  
38  
39  
40  
41  
42  
43  
44  
45  
46  
47  
48  
49  
50  
51  
52  
53  
54  
55  
56  
57  
58  
59  
60

**Title:**

**Patient Reported Outcomes of Cancer Survivors in England 1 to 5 years after Diagnosis: a cross-sectional survey.**

|                   |     |                                                                |
|-------------------|-----|----------------------------------------------------------------|
| Glaser Adam W     | DM  | Leeds Teaching Hospitals NHS Trust <sup>1</sup>                |
| Fraser Lorna K    | PhD | University of York <sup>2</sup>                                |
| Corner Jessica    | PhD | University of Southampton <sup>3</sup>                         |
| Feltbower Richard | PhD | University of Leeds <sup>4</sup>                               |
| Morris Eva JA     | PhD | University of Leeds <sup>5</sup>                               |
| Hartwell Greg     | MA  | Cancer Policy Team, Department of Health <sup>6</sup>          |
| Richards Mike     | MD  | Cancer Policy Team, Department of Health, England <sup>6</sup> |

1. Department of Paediatric Oncology, Martin Wing, Leeds General Infirmary, Great George Street, Leeds, LS1 3EX
2. Department of Health Sciences, Heslington, York, YO10 5DD
3. Faculty of Health Sciences, University of Southampton, Southampton, SO17 1BJ.
4. Division of Epidemiology, Level 8 Worsley Building, Leeds Institute of Genetics, Health & Therapeutics, University of Leeds, Leeds, UK
5. Section of Epidemiology & Biostatistics, Leeds Institute of Molecular Medicine, Level 6 Bexley Wing, St James's University Hospital, Leeds LS9 7TF
6. Cancer Policy Team, Department of Health, Wellington House, London, England.

**Corresponding Author:**

Adam Glaser

Address: Consultant Paediatric Oncologist, Department of Paediatric Oncology, D Floor, Martin Wing, Leeds General Infirmary, Great George Street, Leeds, LS1 3EX

Tel: 0113 3928779

Email: [adam.glaser@leedsth.nhs.uk](mailto:adam.glaser@leedsth.nhs.uk)

**Key Words:**

Cancer, Survivorship, Quality of Life, Patient Reported Outcomes, EQ5D, FACT

**Word Count:**

abstract: 30~~42~~ & main body of paper: 4~~486391~~

## Abstract

Objectives: To determine the feasibility of collecting population based patient reported outcome measures (PROMS) in assessing quality of life (QoL) to inform development of a national PROMS programme for cancer and to begin to describe outcomes in a UK cohort of survivors.

Design: Cross-sectional postal survey of cancer survivors using a population-based sampling approach.

Setting: English National Health Service.

Participants: 4,992 breast, colorectal, prostate and Non-Hodgkin's Lymphoma survivors one to five years from diagnosis.

Primary and Secondary Outcome Measures: Implementation issues, response rates, cancer-specific morbidities utilising items including the EQ5D, tumour-specific sub-scales of the Functional Assessment of Cancer Therapy and Social Difficulties Inventory.

### Results:

3,300 (66%) survivors returned completed questionnaires. The majority aged 85+ years did not respond and [response rates were lower for those from more deprived areas](#) ~~there was an effect of deprivation on response rates~~. Response rates did not differ by gender, time since diagnosis or cancer type.

The presence of one or more long term conditions was associated with significantly lower QoL scores. Individuals from most deprived areas reported lower QoL scores and poorer outcomes on other measures, as did those self-reporting recurrent disease or uncertainty about disease status. QoL scores were [comparable](#) at all time points for all cancers except NHL. QoL scores were lower than those from the general population in Health Survey for England (2008) and General Practice Patient Survey [\(2012\)](#).

47% of patients reported fear of recurrence whilst 20% reported moderate or severe difficulties with mobility or usual activities. Bowel and urinary problems were common

1  
2  
3 among colorectal and prostate patients. Poor bowel and bladder control were significantly  
4 associated with lower QoL.  
5  
6  
7  
8  
9

10 Conclusions: This method of assessing QoL of cancer survivors is feasible and acceptable to  
11 most survivors. Routine collection of national population- based PROMS will enable  
12 identification of, and support for, the specific needs of survivors whilst allowing for  
13 comparison of outcome by service provider.  
14  
15  
16  
17  
18  
19  
20

### 21 **Funding**

22 This survey was funded by the Department of Health, England.  
23  
24  
25  
26  
27  
28  
29  
30  
31  
32  
33  
34  
35  
36  
37  
38  
39  
40  
41  
42  
43  
44  
45  
46  
47  
48  
49  
50  
51  
52  
53  
54  
55  
56  
57  
58  
59  
60

## Article Summary

### Article Focus

To determine the feasibility of routinely collecting population-based patient reported outcomes (PROMS) of cancer survivors to gather information on quality of life and cancer related morbidities that can be used to inform the development of a national PROMS programme for cancer.

### Key messages

- Collection of population-based information on quality of life from cohorts of cancer patients who are 1 to 5 years post diagnosis through cancer registries is feasible.
- The best quality of life was reported by those in remission and with no other long term conditions.
- Information obtained by widespread extension of this methodology will enable health economies to compare outcome across provider organisations and facilitate provision of enhanced services to meet the needs of cancer survivors.

### Strengths and Limitations

- Findings relate to the largest European survey of survivors of multiple cancer types at clearly defined time points from diagnosis.
- The study design eliminates many of the criticisms which have hindered the collection of population-based cancer patient reported outcome data in the past.
- English cancer registries provide a reliable denominator population from which to identify eligible participants.
- The questionnaires for the four cancer groups were identified as having face and content validity by a panel of health and social care professionals prior to use, [following review by consumers and consultation with cancer charities.](#)
- Presence of multiple cancer groups, time points and some missing data may have resulted in a lack of power for certain analyses.

1  
2  
3  
4  
5  
6  
7  
8  
9  
10  
11  
12  
13  
14  
15  
16  
17  
18  
19  
20  
21  
22  
23  
24  
25  
26  
27  
28  
29  
30  
31  
32  
33  
34  
35  
36  
37  
38  
39  
40  
41  
42  
43  
44  
45  
46  
47  
48  
49  
50  
51  
52  
53  
54  
55  
56  
57  
58  
59  
60

- Selection bias may have arisen through differences in-response rates according to cancer group, deprivation category and age.
- The study excluded those treated in the private sector.

For peer review only



## Introduction

1.8 million people are living with and beyond a diagnosis of cancer in England and prevalence is predicted to increase by 3% per annum.<sup>1</sup> Cancer treatments are effectively reducing mortality and extending life, yet there is evidence that physical, psychological and social needs are not being addressed by the health and social care services, with individuals reporting significant unmet needs<sup>2</sup>. There is a lack of robust population-based information from which the prevalence, and impact, of disease and treatment associated morbidity burden can be ascertained and policy for appropriate interventions developed<sup>3</sup>. It has been equally difficult for health economies to compare the quality of health of those following treatment for cancer to those living with other long term conditions (LTC). These deficits have hampered the provision of comprehensive robust services for this growing population<sup>4</sup>.

In the United States a number of significant initiatives have been launched to systematically measure health outcomes in cancer survivors using patient reported outcome measures (PROMS) through the National Cancer Institute and American Cancer Society<sup>3-5-6</sup>. In Europe, at least one regional cancer register has started to collect PROMS via approaches made through the treating clinical teams<sup>7-8</sup>. The focus of PROMS work to date has been on refining treatment decision making for individuals and determining methodological approaches to implementation and analysis<sup>5-6-9-11</sup>. These efforts have yet to feed through into major national health system service improvement initiatives. The evaluation of patients' experiences of cancer care in England, through the National Cancer Patient Experience Survey, has resulted in care provider organisations and commissioners being able to identify areas of strengths and weakness in acute cancer care provision<sup>12</sup>.

Our objective was to determine the feasibility of routinely collecting population-based PROMS of cancer survivors (via a postal survey of individuals identified from cancer registry information), without introduction from clinicians or researchers known to participants, to gather information on quality of life (QoL) and cancer related morbidities that can be used to inform the development of a national PROMS programme for cancer. [Feasibility was assessed for example by evaluating response rates, level of questionnaire completeness and the number of complaints from participants. Findings reported in this paper are a](#)

1  
2  
3 [summary of the analyses which are available in comprehensive form from the Department](https://www.wp.dh.gov.uk/publications/files/2012/12/9284-TSO-2900701-PROMS.pdf)  
4 [of Health \(DH\) website \(https://www.wp.dh.gov.uk/publications/files/2012/12/9284-TSO-](https://www.wp.dh.gov.uk/publications/files/2012/12/9284-TSO-2900701-PROMS.pdf)  
5 [2900701-PROMS.pdf\).](https://www.wp.dh.gov.uk/publications/files/2012/12/9284-TSO-2900701-PROMS.pdf)  
6  
7  
8  
9

## 10 11 12 **Methods**

### 13 *Study design*

14  
15  
16 A cross-sectional postal survey was undertaken of individuals with a diagnosis of breast,  
17 colorectal, non-Hodgkin's lymphoma (NHL) or prostate cancer one, two, three and five  
18 years earlier. These four time-points were chosen to gain an understanding of whether  
19 PROMS varied over time. Patients attending private healthcare centres [\(estimated to be](#)  
20 [less than 5% of cases\)](#) were excluded as the aims of the study focused on the assessment of  
21 PROMS within the National Health Service (NHS) in England.  
22  
23  
24  
25  
26  
27

### 28 *Cohort Identification and Survey Process*

29  
30 Three cancer registries (Thames Cancer Registry, Eastern Cancer Registry and Information  
31 Centre, West Midlands Cancer Intelligence Unit) were chosen as representative examples  
32 of the eight cancer registries in England. They provided information on all relevant cancer  
33 diagnoses<sup>12</sup> (Supplementary File 1) between 01/02/2010-30/04/2010, 01/02/2009-  
34 30/04/2009, 01/02/2008-30/04/2008, and 01/02/2006-30/04/2006. The individual study  
35 cohorts for each cancer at time points one, two, three and five years from date of recorded  
36 diagnosis were compiled through identification of the 312 cases diagnosed most closely to  
37 a specified time-point (First of February for each year). Cases were excluded if: under the  
38 age of 16 years, deceased, or not known to have a UK address.  
39  
40  
41  
42  
43  
44  
45  
46  
47

48 Identified participants were sent a questionnaire by post by the survey provider, *Quality*  
49 *Health*. This was sent under cover of a standard introductory letter with the letter-head of  
50 the cancer centre most recently recorded by the cancer registry as having provided  
51 treatment. The survey covered patients attending 70 of 160 (43%) acute NHS Trusts  
52 delivering cancer care in England during 2011, [although we were unable to determine](#)  
53 [whether these were representative of all patients.](#) Patients consented to taking part in the  
54  
55  
56  
57  
58  
59  
60

1  
2  
3 survey by returning questionnaires and declined by not returning them, or by returning  
4 blank questionnaires. . Two reminders were sent to non-responders. Checks for deceased  
5 patients were undertaken by the registries at four separate time points in the survey  
6 process to ensure attempts were not made to contact deceased individuals.  
7  
8  
9

10  
11  
12 Details of a dedicated freephone telephone helpline, staffed 24 hours each day, were  
13 provided so the queries of any respondents could be resolved.  
14  
15

### 16 17 *Questionnaire design and content* (Supplementary files 2, 3, 4 and 5)

18  
19 Questionnaires were developed for each cancer group. Content was identified through  
20 literature review, commissioned expert reviews<sup>13-15</sup>, consultation with patient groups,  
21 cancer charities and expert advisory groups. In this way the views of multi-professional  
22 clinicians and service users were captured.  
23  
24

25  
26 Generic content included:

- 27  
28 • Demographic and treatment-related questions adapted from the National Cancer  
29 Patient Experience Survey.<sup>12</sup>
- 30  
31 • Self-reported response to treatment and disease status
- 32  
33 • Amount of physical activity performed each week quantified according to the  
34 Chief Medical Officer of England's recommendations<sup>16</sup>.
- 35  
36 • Presence or absence of long-term conditions (LTCs) other than cancer, using a list  
37 widely used in English Department of Health surveys.
- 38  
39 • EQ5D: A 5 item generic health-related quality of life measure<sup>17-18</sup> chosen as it is a  
40 generic measure of health status widely used to evaluate population health in  
41 England<sup>17</sup>.
- 42  
43 • Social Difficulties Inventory (SDI): A cancer survivor specific measure covering  
44 wider QoL domains<sup>19-20,21</sup> including information on the social consequences of  
45 cancer.
- 46  
47 • Experience of care. Relevant items to these phases of the cancer pathway were  
48 taken from the National Cancer Patient Experience Survey Questionnaire.<sup>22</sup>
- 49  
50 • Fear of recurrence and dying. These items were generated by the project team  
51 and cognitively tested on representative sample groups prior to this pilot survey.  
52  
53  
54  
55  
56  
57  
58  
59  
60

- Individual components on psychological issues and work status identified through the literature as being important to cancer survivors but not covered by other components of the survey<sup>23, 24</sup>.

Tumour-specific content included

- Functional Assessment of Cancer Therapy (FACT) tumour specific components (FACT-B, FACT-C, FACT-Lym and FACT-P for breast, colorectal, NHL and prostate cancer respectively)<sup>25</sup>.

*A detailed description of the qualitative comments provided by respondents are reported in a parallel submission to the BMJ Open.*

Cognitive testing was performed on the four site-specific versions of the questionnaire prior to their general use. This was done by sending questionnaires to volunteers (identified through cancer charities and the survey provider) prior to participating in a telephone interview. This style of testing was used to determine the population's ability to complete the questionnaire independently and to follow routing and other instructions in the questionnaire without prompting or help. Appropriate alterations were then made to the questionnaire. The two required changes were omission of a similar item from the FACT-B and FACT-P questionnaires "*I am able to feel like a woman*" and "*I am able to feel like a man*", [because these questions were found to be confusing and unacceptable to volunteers.](#)

#### *Data Handling/Analysis*

Age (at time of survey) was categorised as <55, 55-64, 65-74, 75-84, and  $\geq 85$  years. Self-reported ethnicity was grouped into white, asian, mixed, black and other. Deprivation category was based on the complete index of multiple deprivation (IMD)<sup>26</sup>. This was derived from the lower super output area (small census area) associated with their place of residence at the time of completing the survey, and used because the survey did not include questions related to income or educational level.

Participants were asked if they had any LTC other than their cancer diagnosis and were asked to tick the appropriate LTCs. This variable was categorised into 'no other', 'one other' and 'two or more LTCs'.

1  
2  
3  
4  
5 A crosswalk algorithm was used to convert the 5L EQ5D to the 3L version, allowing a  
6 weighted health score to be assigned for each individual.<sup>27</sup> United Kingdom population data  
7 were used to calculate weighted scores (range -0.5 to 1 [perfect health]). Due to skewness,  
8 this outcome variable was categorised and ordered logistic regression undertaken. Three  
9 categories representing 'high', 'medium' and 'low' QoL scores were defined for ease of  
10 interpretation; these comprised scores equal to 1, less than 1 but greater than or equal to  
11 0.5 and less than 0.5. Odds ratios should be interpreted either as the odds of being in group  
12 2 (medium QoL scores) or group 3 (low QoL scores) compared to group 1 (high QoL scores)  
13 or the odds of being in group 3 (low QoL scores ) compared to group 1 or group 2. [Although](#)  
14 [this was not a standard approach and meant that information and perhaps discriminatory](#)  
15 [power was lost, our model parameterisation enabled a more natural interpretation of EQ5D](#)  
16 [QoL data. Furthermore, when comparisons were made with other alternative models, such](#)  
17 [as tobit regression, findings were very similar.](#)  
18  
19  
20  
21  
22  
23  
24  
25  
26  
27  
28

29  
30 Cancer-specific questions from FACT<sup>25</sup> were used as explanatory variables in this analysis  
31 (FACT total score could not be calculated as only the cancer-specific subscale questions  
32 were included). Patient reported treatments were used in the analyses and treatment  
33 combinations were categorised for each cancer site with the most common used as the  
34 reference group. Given the study design, participants who had survived a year or more and  
35 who reported still receiving treatments when they completed the survey were likely to be  
36 receiving treatment for advanced or recurrent disease.  
37  
38  
39  
40  
41  
42

#### 43 *Statistical methods*

44  
45 Chi-squared tests were used to compare categorical variables. Descriptive statistics were  
46 compared across cancer sites but the statistical models were stratified by cancer site.  
47 Variables were entered into the logistic regression model based on their *a priori* clinical and  
48 public health importance after agreement by the study investigators. Formal variable  
49 selection procedures were not invoked primarily due to statistical problems associated with  
50 these data-driven procedures<sup>28</sup> and, secondly, so that findings could be compared  
51 consistently across cancer sites and time points. Statistical significance was set at 1% to  
52  
53  
54  
55  
56  
57  
58  
59  
60

1  
2  
3  
4  
5  
6  
7  
8  
9  
10  
11  
12  
13  
14  
15  
16  
17  
18  
19  
20  
21  
22  
23  
24  
25  
26  
27  
28  
29  
30  
31  
32  
33  
34  
35  
36  
37  
38  
39  
40  
41  
42  
43  
44  
45  
46  
47  
48  
49  
50  
51  
52  
53  
54  
55  
56  
57  
58  
59  
60

minimise the chances of false-positive associations. All analyses were undertaken using STATA v12.1.

*Ethics and governance*

Approval was given to approach patients without informed consent by the National Information Governance Board (Supplementary File 6) as the study was performed as service evaluation<sup>29</sup>.

For peer review only

## Results

### *Participants*

Questionnaires were sent to 4992 individuals, 126 (2.5%) of these had moved or died prior to receiving the questionnaire resulting in a final sample size of 4866. 3300 completed questionnaires were received (66% of the study sample). Of the surveys received by participants, the response rate was 68% (3300/4866).

### *Response rates*

Response rate varied significantly between cancer groups (Table 1a): 69.4% in the prostate group compared to 62.3% in the NHL group ( $p < 0.001$ ).

There was significant difference in the age structure of the non-responders vs. responders with a higher proportion of non-responders in the  $\geq 85$  years age group ( $p < 0.001$ ).

Response rates differed according to deprivation status (Table 1a) with a response rate of 71.4% in the least deprived category compared to 57.1% in the most deprived category ( $p < 0.001$ ).

No difference in response rates by time since diagnosis, sex or cancer type was found ([see https://www.wp.dh.gov.uk/publications/files/2012/12/9284-TSO-2900701-PROMS.pdf for full details](https://www.wp.dh.gov.uk/publications/files/2012/12/9284-TSO-2900701-PROMS.pdf)).

### *Demographics of respondents (Table 1b)*

Overall there were more males than females. Median age was 69 years (range 36-102). There was significant variation in the distribution of ethnicity by cancer group with higher proportions of non-white ethnic groups with NHL. There was no significant difference by deprivation between cancer groups. Overall more than half of patients reported having a LTC. There were fewer reported LTCs in the breast cohort than in other groups but this did not reach statistical significance.

1  
2  
3  
4  
5  
6  
7  
8  
9  
10  
11  
12  
13  
14  
15  
16  
17  
18  
19  
20  
21  
22  
23  
24  
25  
26  
27  
28  
29  
30  
31  
32  
33  
34  
35  
36  
37  
38  
39  
40  
41  
42  
43  
44  
45  
46  
47  
48  
49  
50  
51  
52  
53  
54  
55  
56  
57  
58  
59  
60

For peer review only



### *Missing data*

Missing data levels were extremely low, typically less than 5% for most fields. SDI had slightly higher levels of missing data with completeness ranging from 80-85%. For the regression modelling (Tables 3a-3d) which used complete case analysis approach, completeness levels were lower and ranged from 60% (colorectal, prostate) to 83% (breast). There was no evidence that the prevalence of missing data was related to the order of the questions after examining levels of completeness for questions at the beginning compared to the end of the form.

### *Helpline calls and other contact from survey participants*

64 calls were made to the helpline, whilst further information about patient status was received via letters from patients (11) and NHS Trusts (2). The total number of enquiries was 77, representing 0.02% of the study cohort.

### *Generic PROMS*

Responses for the five EQ5D questions demonstrated that a higher percentage of NHL patients reported problems with self-care, mobility and usual activities. Two-thirds of breast cancer patients reported some degree of pain (Supplementary Table 1).

When detailed responses for the five EQ5D questions were summarised by time since diagnosis, there were no significant differences for pain, mobility, usual activities or self-care. ~~but~~ However, the percentage reporting no anxiety or depression symptoms ~~de~~increased significantly from 55% at 1 year post-diagnosis to 66% after 5 years ( $p=0.01$ ) (Supplementary Table 2).

Skewed weighted health scores were obtained from the EQ5D by cancer group (Supplementary Figure 1). The prostate group had significantly higher median (0.88) scores than the other three groups (0.84) ( $p=0.001$ ). The proportion of the populations reporting high QoL scores ranged from 24.4% for breast to 40.0% for prostate cancer (Table 2). Conversely, the proportion reporting low QoL scores ranged from 8.9% for breast to 13.1% for NHL. For all tumour groups, irrespective of remission status, the percentage of

1  
2  
3 individuals reporting lower QoL scores increased as the number of other LTCs increased  
4 (Supplementary Tables 3-4).  
5  
6  
7

### 8 *Result by Tumour Type*

9  
10 Multivariable ordered logistic regression (Tables 3a-3d) identified three factors which were  
11 consistently associated with lower QoL scores irrespective of tumour type: presence of LTCs,  
12 undertaking little physical activity and self-reported disease status.  
13  
14

### 15 *Breast Cancer (Table 3a)*

16  
17 Increasing number of LTCs, having recurrence of disease or being uncertain of disease status  
18 were associated with poorer outcomes across all three measures: The presence of one (OR  
19 1.84, 95%CI 1.25,2.70) or two or more (Odds Ratio (OR) 7.30, 95%Confidence Interval (CI)  
20 4.45,11.93) LTCs was significantly associated with lower QoL scores. Individuals self-  
21 reporting recurrent disease (OR 4.70, 95%CI 1.92,11.52) or those uncertain about their  
22 disease status (OR 2.51, 95%CI 1.27,4.96) were significantly more likely to report lower QoL  
23 scores compared to those self-reporting remission.  
24  
25  
26  
27  
28  
29  
30  
31

32  
33 Increasing age (apart from those aged 85 years or older) and more days undertaking  
34 physical activity were significantly associated with better outcomes in EQ5D, SDI and FACT-B  
35 measures: Those aged 65-74 reported significantly higher QoL scores compared to under  
36 55s (OR 0.36, 95%CI 0.22,0.58). Increasing physical activity was associated with higher QoL  
37 scores with each additional reported day per week of physical activity reducing the odds of a  
38 lower score by 12% (OR 0.88, 95%CI 0.82,0.95).  
39  
40  
41  
42  
43  
44

45  
46 Individuals from the most deprived areas were significantly more likely to report lower  
47 EQ5D derived QoL scores than those from the most affluent areas (OR 3.00, 95%CI 1.64-  
48 5.50). Poorer outcomes in FACT-B items were associated with being in the most deprived  
49 category.  
50  
51  
52

### 53 *Colorectal Cancer (Table 3b)*

54  
55 The presence of one (OR 2.09, 95%CI 1.29,3.37) or two or more (OR 4.83, 95%CI 2.85,8.21)  
56 LTCs was significantly associated with lower QoL scores. Those who completed the  
57  
58  
59

questionnaire whilst undergoing treatment (OR 7.03, 95%CI 2.44,20.21), experiencing recurrent disease (OR 4.56, 95%CI 1.54,13.49) or who were uncertain about their disease status (OR 2.67, 95%CI 1.23,5.79) had significantly increased odds of reporting lower QoL scores compared to those reporting remission.

Increasing physical activity was significantly associated with a 17% decrease in the odds of a lower QoL score with each additional day per week of physical activity (OR 0.83, 95%CI 0.76,0.90).

23.5% reported urinary leakage, 19.0% difficulty controlling their bowels and 19.2% had a stoma. Individuals experiencing any difficulty controlling their bowels were more than twice as likely to report lower QoL scores (OR 2.30, 95%CI 1.43,3.72). The presence of a stoma or urinary leakage was not significantly associated with QoL.

Greater difficulties with holidays and travel were reported by those with colorectal cancer compared to other cancers. For example, only 51% of colorectal respondents reporting no difficulty compared to 64% with breast or prostate cancer.

#### *Non-Hodgkin's Lymphoma (Table 3c)*

The presence of one (OR 2.16, 95%CI 1.44,3.24) or two or more (OR 7.26, 95%CI 4.51,11.69) LTCs was significantly associated with lower QoL scores. Those currently being treated (OR 2.57, 95%CI 1.52,4.33), experiencing a recurrence (OR 3.73, 95%CI 1.68,8.29) or who were not sure about their disease status (OR 3.04, 95%CI 1.58,5.84) had increased odds of reporting lower QoL scores compared to those in remission. These same factors were associated with poorer outcomes on the SDI and FACT-Lym items.

A significant positive association between increasing physical activity and QoL was seen with each additional day of physical activity reducing the odds of lower QoL score by 9% (OR 0.91, 95%CI 0.84,0.98). QoL seemed to improve with time from diagnosis for NHL but the trend was not significant ( $p=0.100$ ).

### *Prostate Cancer (Table 3d)*

The presence of two or more LTCs (OR 4.28, 95%CI 2.62,7.01) or being in the most deprived category (OR 2.57, 95%CI 1.31,5.04) were significantly associated with lower QoL scores, as well as increased social distress and difficulties identified by FACT-P.

Patients who had surgery only (compared to radiotherapy and hormone treatment) had significantly higher QoL scores (OR 0.39, 95%CI 0.21,0.71) as did those reporting more days of physical activity (OR 0.82, 95%CI 0.75,0.88).

38.5% of prostate patients reported some degree of urinary leakage, 12.9% reported difficulty controlling their bowels and 58.4% reported being unable to have an erection with a further 11% reporting significant difficulty in having or maintaining an erection. The presence of urinary leakage was significantly associated with lower QoL scores (OR 3.52, 95%CI 2.32,5.35). Erectile dysfunction and difficulty controlling bowels were not significantly associated with QoL scores.

Prostate survivors had significantly lower overall social distress scores on the SDI as well as fewer problems in all three sub-scales (everyday living, money matters, self and others) compared to other cancer types.

### *Fear of recurrence and dying*

Almost half (47.3%) of patients reported fear of recurrence and over a quarter (26.8%) reported fear of dying (Supplementary Table 5). Both of these fears decreased significantly with time since diagnosis.

### *Physical activity*

Around one-fifth (21.4%) of participants reported taking 30 minutes or more of physical activity at least five days a week (in line with the Chief Medical Officer's recommendations). This varied by cancer: 16.5% for NHL, 19.0% for breast, 20.2% for colorectal and 29.0% for prostate. Overall 29.8% of patients reported doing no physical activity; this varied by cancer

1  
2  
3 group with 33·5% of NHL, 31·5% of colorectal and 27·4% of both breast and prostate  
4 survivors doing no physical activity.  
5  
6  
7  
8  
9  
10  
11  
12  
13  
14  
15  
16  
17  
18  
19  
20  
21  
22  
23  
24  
25  
26  
27  
28  
29  
30  
31  
32  
33  
34  
35  
36  
37  
38  
39  
40  
41  
42  
43  
44  
45  
46  
47  
48  
49  
50  
51  
52  
53  
54  
55  
56  
57  
58  
59  
60

For peer review only

## Discussion

This study represents the largest European survey of survivors of multiple cancer types at clearly defined time points from diagnosis and demonstrates the feasibility of this straightforward method of collecting informative self-reported PROMS data on population-based cohorts of individuals living with and beyond a diagnosis of cancer in England. The process eliminates many of the potential biases that have hindered the collection of population-based cancer PROMS data in the past originating from the use of clinical trial data or acute service provider units for recruitment<sup>30</sup>. English cancer registries, which capture approximately 98-99% of all cancers diagnosed in England<sup>31</sup>, provide a reliable denominator population from which to identify eligible participants.

### *Acceptability and Validity*

The relatively high response rate, low level of missing data and low number of calls to the dedicated 24 hour helpline suggest that the methodology is acceptable to the majority of participants. However, the finding of lower participation amongst the elderly or those residing in areas with the greatest socio-economic deprivation would suggest that individuals from these vulnerable groups may need to be assessed by alternative methods. Whilst the questionnaires were identified as having face and content validity by a panel of health and social care professionals prior to use this study does not permit us to comment on the responsiveness or reliability of the instruments. However, the core components of the questionnaires had been identified by independent review as being reliable and appropriate for use in this setting<sup>13-15</sup>.

### *Key results*

The QoL of survivors for all four cancers was significantly related to self-reported disease status (remission versus relapse/uncertain), age and presence of LTCs. QoL appeared to either remain constant or improve slightly as time from diagnosis increased. This suggests that some problems experienced by cancer patients persist for long periods.

We have quantified the community prevalence of previously known late morbidities and assessed their impact on QoL. Problems relating to urinary and bowel control have been

1  
2  
3 shown to be common, with nearly 40% of prostate survivors reporting urinary leakage and  
4 13% difficulty controlling their bowels. Similarly, amongst colorectal survivors nearly a  
5 quarter reported urinary leakage and 19% reported difficulty controlling their bowels.  
6 These rates are comparable to other studies of cancer patients<sup>32</sup> but exceed those seen in  
7 non-cancer populations where the prevalence of urinary incontinence in adult men was  
8 4.5% overall, rising to 16.0% for over 75 year olds<sup>33</sup>. In this study, the presence of “urinary  
9 leakage” in prostate survivors and “of difficulty controlling their bowels” in colorectal  
10 survivors were significantly associated with lower QoL scores making such symptoms  
11 important to address. Erectile dysfunction in prostate survivors, though common, did not  
12 significantly impact on QoL. The finding that QoL or physical problems such as difficulty  
13 controlling bowels or incontinence do not appear to be less prevalent five years following  
14 treatment may suggest individuals are not receiving adequate help or treatment for these  
15 conditions. Greater efforts should be made in prevention and early intervention for  
16 problems resulting from cancer treatment, and directed at those most at risk of the long-  
17 term problems identified from this study.  
18  
19  
20  
21  
22  
23  
24  
25  
26  
27  
28  
29  
30

### 31 *Comparison with the General Population Data*

32 Most survivors in this study who were in remission and did not report a LTC were found to  
33 have a high QoL score. However, even the subgroup in remission with no LTC reported  
34 lower QoL scores than the data available from general population studies (Table 4). Some of  
35 this difference may be accounted for by age, as the Health Survey for England (2008)<sup>34</sup> and  
36 the General Practice Patient Survey (GPPS)<sup>35</sup> cohorts were substantially younger than the  
37 reported cancer study cohort. This assumption is supported from the HSE cohort aged over  
38 45 years (median age 63, n=7672) which reported a reduction in QoL scores (good 45%,  
39 moderate 46%, poor 9%).  
40  
41  
42  
43  
44  
45  
46  
47  
48

### 49 *Long-term Conditions*

50  
51  
52 The presence of one or more LTCs, other than their cancer diagnosis, was associated with  
53 lower QoL scores in all four cancer groups and mirrors findings from other studies<sup>2 36</sup>. The  
54 presence of multi-morbidity and LTCs identifies sub-sets of survivors who may require more  
55 active support than others. This needs to be factored into risk stratification models as  
56  
57  
58  
59  
60

1  
2  
3 health services move away from hospital based cancer follow-up towards a greater focus on  
4 self-management.  
5  
6

### 7 8 *Physical Activity* 9

10 The extent to which cancer survivors take physical activity has not previously been reported  
11 in England. The findings agree with those from the USA<sup>37</sup>, suggesting that prostate survivors  
12 are more likely than others to take moderate or vigorous physical activity. We observed an  
13 association between higher levels of activity and higher QoL scores, but it is not possible to  
14 assess from a cross-sectional survey whether there is a causal relationship.  
15  
16  
17  
18

19  
20 A smaller percentage of study respondents (21.4%) met the Chief Medical Officer of  
21 England's recommendations for physical activity when compared with the HSE(2008) in  
22 which 34% of adults met these guidelines<sup>34</sup>. Restricting the HSE data to a similar age profile  
23 as the study participants (60-75 years) saw similar levels of physical activity (23%). The HSE  
24 data found a trend of decreased physical activity with increasing age, yet, in this study,  
25 prostate survivors (the oldest subgroup) reported higher physical activity levels.  
26  
27  
28  
29  
30  
31

### 32 33 *Limitations* 34

35 The presence of multiple cancer groups and time points, along with some missing data  
36 (typically <5%), may have resulted in [either](#) a lack of power for certain analyses [or type I](#)  
37 [errors \(false positive results\) due to the number of comparisons](#). For example, investigating  
38 whether the quality of life of those living with recurrent disease differed from those  
39 survivors who had been 'cured'. The non-response rate varied significantly by cancer group,  
40 deprivation category and age, which could result in selection bias when generalising results.  
41 To overcome bias associated with deprivation and age, we propose extension of the pilot  
42 study to the largest possible cohorts available nationally; analyses and interpretation of this  
43 data will be performed with maximum sensitivity to these areas.  
44  
45  
46  
47  
48  
49  
50

51  
52 Our study excluded those treated in the private sector (estimated to be under 5% of cancer  
53 cases in England<sup>38</sup>). Treatments may also have changed over the 1-5 year period used to  
54 select survivors and it is therefore possible the results reflect these changes.  
55  
56  
57  
58  
59  
60



1  
2  
3 The study relied on self-reporting of long-term conditions, response to treatment and  
4 disease status. This information was not independently verified.  
5  
6

7  
8 ~~The highly skewed EQ5D outcome variable was categorised into three levels for~~  
9 ~~multivariable modelling, which is not a standard approach and meant that information and~~  
10 ~~perhaps discriminatory power was lost. However, our model parameterisation enabled a~~  
11 ~~more natural interpretation of EQ5D QoL data and when comparisons were made with~~  
12 ~~other alternative models, such as tobit regression, findings were very similar.~~ We also  
13 acknowledge that measures related to the FACT component are primarily intended for use  
14 around the time of treatment rather than for survivorship work. Space limitations precluded  
15 a more detailed description of results incorporating the FACT and SDI components.  
16 However, a comprehensive report including these additional findings has been compiled  
17 and can be accessed via the DH website  
18 (<https://www.wp.dh.gov.uk/publications/files/2012/12/9284-TSO-2900701-PROMS.pdf>).  
19  
20  
21  
22  
23  
24  
25  
26  
27  
28

### 29 *Where next for Cancer PROMS in England?*

30  
31 The use of cancer PROMS has generally been restricted to clinical research, especially  
32 clinical trials or small studies. Whilst important work has been undertaken to develop  
33 approaches for the measurement of PROMS, they have not been incorporated into routine  
34 measurement at a whole health system level. This study demonstrates that population-  
35 based survey approaches are feasible and yield acceptable response rates. This approach  
36 could provide important insights into where improvement efforts should be targeted to  
37 reduce the long-term burden of cancer and its treatments on the growing number of cancer  
38 survivors.  
39  
40  
41  
42  
43  
44  
45

46  
47 Improving QoL in patients with LTC is one of the key goals of English government health  
48 policy (forming Domain 2 of the NHS Outcomes Framework)<sup>39</sup>. The approach we report  
49 should be scaled up and integrated within routine health outcome assessment on a national  
50 basis so that results can be distilled down to hospital/service provider level, as has been  
51 done in relation to the experience of acute care of cancer patients<sup>12</sup>. Improvements in  
52 quality of survivor care could then be driven by publishing hospital/provider level data. As a  
53 result of the findings of this pilot, a national roll-out to all individuals diagnosed 1-3 years  
54  
55  
56  
57  
58  
59  
60

1  
2  
3 earlier with colorectal cancer in England is being performed in January 2013. A similar roll-  
4 out to those diagnosed with prostate cancer is planned whilst pilot questionnaires for those  
5 with bladder, cervical, endometrial and ovarian cancer are being prepared. To further  
6 understand the developmental trajectory of morbidity burden, a longitudinal survey of  
7 respondents to the pilot is being undertaken, with a survey 1 year on having been  
8 undertaken and consideration for a further data collection point after another 12 months.  
9

10  
11  
12  
13  
14  
15 Our findings support the on-going international efforts to identify risk factors for poor  
16 health-related QoL outcomes following a cancer diagnosis. These include the presence of  
17 other LTCs, deprivation and limited physical activity. These, along with the high prevalence  
18 of on-going condition-specific problems such as bowel, urinary and erectile dysfunction,  
19 warrant attention by cancer services.  
20  
21  
22  
23  
24  
25  
26  
27  
28  
29  
30  
31  
32  
33  
34  
35  
36  
37  
38  
39  
40  
41  
42  
43  
44  
45  
46  
47  
48  
49  
50  
51  
52  
53  
54  
55  
56  
57  
58  
59  
60

### *Acknowledgements*

Dr Nicola Davies, Professor Jane Maher, Dr Mick Peake, Professor Galina Velikova and Dr Penny Wright provided expert advice regarding questionnaire and study design. Thames Cancer Registry, Eastern Cancer Registry and Information Centre, and West Midlands Cancer Intelligence Unit provided information on all eligible cancer survivors. FACIT provided permission to use components of the FACT questionnaires and Penny Wright granted permission to use the Social Difficulties Inventory.

### *Funding*

This survey was funded by the Department of Health, England.

Open source access for BMJ Open was funded through a grant from Macmillan Cancer Support.

### *Declaration of Competing Interests*

All authors have completed the Unified Competing Interest form at [www.icmje.org/coi\\_disclosure.pdf](http://www.icmje.org/coi_disclosure.pdf) (available on request from the corresponding author) and declare: financial support for the submitted work from the Department of Health, England: AWG, GH and MR were employed by the Cancer Policy Team, Department of Health, England, whilst the research was carried out; AWG, LKF, RGF and EF, received financial support from Department of Health, England, to carry out the analysis of data reported; JC and MR co-chaired the Department of Health, England, Cancer Patient Experience Advisory Group.

### *Data Sharing Statement*

Statistical code and dataset are available from the corresponding author at the University of Leeds, who will provide a permanent, citable and open access home for the dataset.

### *Author Contribution Statement*

Adam Glaser contributed to the study design, data collection, data analysis, data interpretation and writing of this manuscript.

Lorna Fraser contributed to the data analysis, data interpretation and writing of this manuscript.

1  
2  
3 Jessica Corner contributed to the study design, data collection, data interpretation and  
4 writing of this manuscript.  
5

6 Richard Feltbower contributed to the data analysis, data interpretation and writing of this  
7 manuscript.  
8

9  
10 Eva Morris contributed to the data analysis, data interpretation and writing of this  
11 manuscript.  
12

13 Greg Hartwell contributed to the study design and data collection.  
14

15 Mike Richards contributed to the study design, data interpretation, and writing of this  
16 manuscript.  
17  
18

19  
20  
21 Copyright/licence for publication statement  
22

23  
24 “The Corresponding Author has the right to grant on behalf of all authors and does grant on  
25 behalf of all authors, a worldwide licence to the Publishers and its licensees in perpetuity, in  
26 all forms, formats and media (whether known now or created in the future), to i) publish,  
27 reproduce, distribute, display and store the Contribution, ii) translate the Contribution into  
28 other languages, create adaptations, reprints, include within collections and create  
29 summaries, extracts and/or, abstracts of the Contribution, iii) create any other derivative  
30 work(s) based on the Contribution, iv) to exploit all subsidiary rights in the Contribution, v)  
31 the inclusion of electronic links from the Contribution to third party material where-ever it  
32 may be located; and, vi) licence any third party to do any or all of the above.”  
33  
34  
35  
36  
37  
38  
39  
40  
41  
42  
43  
44  
45  
46  
47  
48  
49  
50  
51  
52  
53  
54  
55  
56  
57  
58  
59  
60

Table 1a Demographic data of responders and non-responders

| Characteristic                  |                             | Responders<br>(n=3300) |      | Non Responders<br>(n=1692) |      | Total<br>number<br>approached | Overall<br>Percentage<br>Responding |
|---------------------------------|-----------------------------|------------------------|------|----------------------------|------|-------------------------------|-------------------------------------|
|                                 |                             | n                      | %    | n                          | %    |                               |                                     |
| <b>Cancer<br/>Group</b>         | $\chi^2=18.8,$<br>$p<0.001$ |                        |      |                            |      |                               |                                     |
| Breast                          |                             | 854                    | 25.9 | 394                        | 23.3 | 1248                          | 68.4                                |
| Colorectal                      |                             | 802                    | 24.3 | 446                        | 26.4 | 1248                          | 64.3                                |
| NHL                             |                             | 778                    | 23.6 | 470                        | 27.8 | 1248                          | 62.3                                |
| Prostate                        |                             | 866                    | 26.2 | 382                        | 22.5 | 1248                          | 69.4                                |
| <b>Age</b>                      | $\chi^2=108,$<br>$p<0.001$  |                        |      |                            |      |                               |                                     |
| under 55                        |                             | 467                    | 14.2 | 282                        | 16.7 | 749                           | 62.3                                |
| 55 to 64                        |                             | 692                    | 21.0 | 335                        | 19.8 | 1027                          | 67.4                                |
| 65 to 74                        |                             | 1,108                  | 33.6 | 414                        | 24.5 | 1522                          | 72.8                                |
| 75 to 84                        |                             | 835                    | 25.3 | 434                        | 25.6 | 1269                          | 65.8                                |
| 85+                             |                             | 198                    | 6.0  | 227                        | 13.4 | 425                           | 46.6                                |
| <b>IMD<br/>Category</b>         | $\chi^2=55.9,$<br>$p<0.001$ |                        |      |                            |      |                               |                                     |
| 1 least<br>deprived             |                             | 826                    | 25.0 | 331                        | 19.6 | 1157                          | 71.4                                |
| 2                               |                             | 812                    | 24.6 | 357                        | 21.1 | 1169                          | 69.5                                |
| 3                               |                             | 703                    | 21.3 | 349                        | 20.7 | 1052                          | 66.8                                |
| 4                               |                             | 554                    | 16.8 | 352                        | 20.7 | 906                           | 61.1                                |
| 5 most<br>deprived              |                             | 399                    | 12.1 | 300                        | 17.7 | 699                           | 57.1                                |
| Missing                         |                             | 6                      | 0.2  | 3                          | 0.2  | 9                             | 66.7                                |
| <b>Time since<br/>Diagnosis</b> | $\chi^2=4.1,$<br>$p=0.25$   |                        |      |                            |      |                               |                                     |
| 1 year                          |                             | 848                    | 25.7 | 400                        | 23.6 | 1248                          | 67.9                                |
| 2 years                         |                             | 834                    | 25.3 | 414                        | 24.5 | 1248                          | 66.8                                |
| 3 years                         |                             | 806                    | 24.4 | 442                        | 26.1 | 1248                          | 64.6                                |
| 5 years                         |                             | 812                    | 24.6 | 436                        | 25.8 | 1248                          | 65.1                                |

Table 1b. Demographic Data by Cancer Group

| Characteristic                         |                               | Breast<br>(n=854) |      | Colorectal<br>(n=802) |      | Non Hodgkin's<br>Lymphoma<br>(n=778) |      | Prostate<br>(n=866) |      | Total<br>(n=3300) |      |
|----------------------------------------|-------------------------------|-------------------|------|-----------------------|------|--------------------------------------|------|---------------------|------|-------------------|------|
|                                        |                               | n                 | %    | n                     | %    | n                                    | %    | n                   | %    | n                 | %    |
| Sex                                    | $\chi^2=1700$ ,<br>$p<0.001$  |                   |      |                       |      |                                      |      |                     |      |                   |      |
| Male                                   |                               | 10                | 1.2  | 435                   | 54.2 | 419                                  | 53.9 | 848                 | 97.9 | 1712              | 51.9 |
| Female                                 |                               | 829               | 97.0 | 348                   | 43.4 | 352                                  | 45.2 | 0                   | 0    | 1529              | 46.3 |
| Missing                                |                               | 15                | 1.8  | 19                    | 2.4  | 7                                    | 0.9  | 18                  | 2.1  | 59                | 1.8  |
| Age                                    | $\chi^2=401$ ,<br>$p<0.001$   |                   |      |                       |      |                                      |      |                     |      |                   |      |
| under 55                               |                               | 231               | 27.0 | 57                    | 7.1  | 157                                  | 20.2 | 157                 | 18.1 | 467               | 14.2 |
| 55 to 64                               |                               | 237               | 27.8 | 136                   | 17.0 | 173                                  | 22.2 | 173                 | 20.0 | 692               | 21.0 |
| 65 to 74                               |                               | 224               | 26.2 | 280                   | 34.9 | 238                                  | 30.6 | 238                 | 27.5 | 1,108             | 33.6 |
| 75 to 84                               |                               | 122               | 14.3 | 246                   | 30.7 | 175                                  | 22.5 | 175                 | 20.2 | 835               | 25.3 |
| 85+                                    |                               | 40                | 4.7  | 83                    | 10.3 | 35                                   | 4.5  | 35                  | 4.0  | 198               | 6.0  |
| Ethnicity                              | $\chi^2=74.6$ ,<br>$p<0.001$  |                   |      |                       |      |                                      |      |                     |      |                   |      |
| White                                  |                               | 768               | 89.9 | 740                   | 92.3 | 688                                  | 88.4 | 786                 | 90.8 | 2982              | 90.4 |
| Asian                                  |                               | 35                | 4.1  | 19                    | 2.3  | 30                                   | 3.9  | 15                  | 1.7  | 99                | 3.0  |
| Black                                  |                               | 14                | 1.6  | 11                    | 1.4  | 21                                   | 2.7  | 36                  | 4.2  | 82                | 2.5  |
| Mixed                                  |                               | 4                 | 0.5  | 5                     | 0.6  | 6                                    | 0.8  | 1                   | 0.1  | 16                | 0.5  |
| Other                                  |                               | 4                 | 0.5  | 0                     | 0    | 4                                    | 0.5  | 3                   | 0.3  | 11                | 0.3  |
| Missing                                |                               | 29                | 3.4  | 27                    | 3.4  | 29                                   | 3.7  | 25                  | 2.9  | 110               | 3.3  |
| IMD<br>Category                        | $\chi^2=4.3$ ,<br>$p=0.97$    |                   |      |                       |      |                                      |      |                     |      |                   |      |
| 1 least<br>deprived                    |                               | 211               | 24.7 | 198                   | 24.7 | 202                                  | 26.0 | 215                 | 24.8 | 826               | 25.0 |
| 2                                      |                               | 210               | 24.6 | 199                   | 24.8 | 183                                  | 23.5 | 220                 | 25.4 | 812               | 24.6 |
| 3                                      |                               | 184               | 21.5 | 159                   | 19.8 | 177                                  | 22.7 | 183                 | 21.1 | 703               | 21.3 |
| 4                                      |                               | 141               | 16.5 | 147                   | 18.3 | 125                                  | 16.1 | 141                 | 16.3 | 554               | 16.8 |
| 5 most<br>deprived                     |                               | 104               | 12.2 | 98                    | 12.2 | 91                                   | 11.7 | 106                 | 12.2 | 399               | 12.1 |
| Missing                                |                               | 4                 | 0.5  | 1                     | 0.1  | 0                                    | 0    | 1                   | 0.1  | 6                 | 0.2  |
| Time since<br>Diagnosis                | $\chi^2=5.5$ ,<br>$p=0.78$    |                   |      |                       |      |                                      |      |                     |      |                   |      |
| 1 year                                 |                               | 215               | 25.2 | 202                   | 25.2 | 197                                  | 25.3 | 234                 | 27.0 | 848               | 25.7 |
| 2 years                                |                               | 212               | 24.8 | 215                   | 26.8 | 187                                  | 24.0 | 220                 | 25.4 | 834               | 25.3 |
| 3 years                                |                               | 204               | 23.9 | 195                   | 24.3 | 207                                  | 26.6 | 200                 | 23.1 | 806               | 24.4 |
| 5 years                                |                               | 223               | 26.1 | 190                   | 23.7 | 187                                  | 24.0 | 212                 | 24.5 | 812               | 24.6 |
| Other Long<br>Term Health<br>Condition | $\chi^2=12.1$ ,<br>$p=0.06$   |                   |      |                       |      |                                      |      |                     |      |                   |      |
| Yes                                    |                               | 435               | 50.9 | 432                   | 53.9 | 435                                  | 55.9 | 501                 | 57.9 | 1803              | 54.6 |
| No                                     |                               | 353               | 41.3 | 309                   | 38.5 | 287                                  | 36.9 | 299                 | 34.5 | 1248              | 37.8 |
| Don't Know                             |                               | 30                | 6.9  | 23                    | 2.9  | 33                                   | 4.2  | 27                  | 3.1  | 113               | 3.4  |
| Missing                                |                               | 36                | 4.2  | 38                    | 4.7  | 23                                   | 3.0  | 39                  | 4.5  | 136               | 4.1  |
| Disease<br>Status                      | $\chi^2=390.0$ ,<br>$p<0.001$ |                   |      |                       |      |                                      |      |                     |      |                   |      |
| Remission                              |                               | 677               | 79.3 | 625                   | 77.9 | 526                                  | 67.6 | 399                 | 46.1 | 2227              | 67.5 |
| Rx but<br>present                      |                               | 26                | 3.0  | 32                    | 4.0  | 81                                   | 10.4 | 144                 | 16.6 | 283               | 8.6  |
| Not treated                            |                               | 4                 | 0.5  | 6                     | 0.7  | 43                                   | 5.5  | 78                  | 9.0  | 131               | 4.0  |

|                   |  |    |     |    |     |    |     |     |      |     |     |
|-------------------|--|----|-----|----|-----|----|-----|-----|------|-----|-----|
| <b>Recurrence</b> |  | 30 | 3.5 | 20 | 2.5 | 30 | 3.9 | 8   | 0.9  | 88  | 2.6 |
| <b>Not sure</b>   |  | 58 | 6.8 | 69 | 8.6 | 53 | 6.8 | 140 | 16.2 | 320 | 9.7 |
| <b>Missing</b>    |  | 59 | 6.9 | 50 | 6.2 | 45 | 5.8 | 97  | 11.2 | 251 | 7.6 |

For peer review only

Table 2. EQ5D outcome category by cancer sub-group

| EQ5D Categories                  | 'High' QoL<br>(Scores=1) |      | Medium QoL<br>(0.5≤Scores<1) |      | Low QoL<br>(Scores<0.5) |      | Missing |     |
|----------------------------------|--------------------------|------|------------------------------|------|-------------------------|------|---------|-----|
|                                  | n                        | %    | n                            | %    | n                       | %    | n       | %   |
| <b>Breast</b>                    | 208                      | 24.4 | 514                          | 60.2 | 76                      | 8.9  | 56      | 6.6 |
| <b>Colorectal</b>                | 255                      | 31.2 | 434                          | 54.1 | 87                      | 10.8 | 26      | 3.2 |
| <b>Non Hodgkins<br/>Lymphoma</b> | 247                      | 31.7 | 398                          | 51.2 | 102                     | 13.1 | 31      | 4.0 |
| <b>Prostate</b>                  | 347                      | 40.0 | 390                          | 45.0 | 81                      | 9.4  | 48      | 5.5 |
| <b>Total</b>                     | 1057                     | 32.0 | 1736                         | 52.6 | 346                     | 10.5 | 161     | 4.9 |

For peer review only



Table 3a. Ordered Logistic Regression Model EQ5D in Breast Cancer Patients [n=709, pseudoR<sup>2</sup>=0.16  
p<0.001]

| Characteristic                       | Odds Ratio* | 95% CI |       | P value |
|--------------------------------------|-------------|--------|-------|---------|
| <b>Age (years)</b>                   |             |        |       |         |
| <55 years                            | REF         |        |       |         |
| 55-64                                | 0.69        | 0.45   | 1.06  | 0.09    |
| 65-74                                | 0.36        | 0.22   | 0.58  | <0.001  |
| 75-84                                | 0.59        | 0.32   | 1.08  | 0.09    |
| 85+                                  | 1.61        | 0.57   | 4.52  | 0.36    |
| <b>Deprivation</b>                   |             |        |       |         |
| 1 least deprived                     | REF         |        |       |         |
| 2                                    | 1.03        | 0.66   | 1.62  | 0.88    |
| 3                                    | 1.10        | 0.68   | 1.77  | 0.71    |
| 4                                    | 0.93        | 0.55   | 1.56  | 0.78    |
| 5 most deprived                      | 3.00        | 1.64   | 5.50  | <0.001  |
| <b>Physical Activity†</b>            | 0.88        | 0.82   | 0.95  | <0.001  |
| <b>Number of other LTC (excl BP)</b> |             |        |       |         |
| 0                                    | REF         |        |       |         |
| 1                                    | 1.84        | 1.25   | 2.70  | 0.002   |
| 2+                                   | 7.30        | 4.45   | 11.93 | <0.001  |
| <b>Treatment*</b>                    |             |        |       |         |
| Radio+Chemo+Surgery+Hormone          | REF         |        |       |         |
| Radio +Chemo+Surgery                 | 0.67        | 0.38   | 1.20  | 0.18    |
| Radio+Surgery                        | 0.51        | 0.29   | 0.90  | 0.02    |
| Radio+Surgery+Hormone                | 0.56        | 0.33   | 0.96  | 0.04    |
| Surgery only                         | 1.00        | 0.55   | 1.84  | 0.99    |
| Other                                | 0.92        | 0.53   | 1.58  | 0.76    |
| <b>Ethnicity</b>                     |             |        |       |         |
| White                                | REF         |        |       |         |
| Mixed                                | 0.50        | 0.06   | 4.29  | 0.53    |
| Asian                                | 1.96        | 0.77   | 5.01  | 0.16    |
| Black                                | 0.29        | 0.08   | 0.98  | 0.05    |
| Other                                | 2.20        | 0.17   | 29.32 | 0.55    |
| <b>Disease Status</b>                |             |        |       |         |
| Remission                            | REF         |        |       |         |
| Rx but present                       | 1.49        | 0.56   | 3.93  | 0.43    |
| Not treated                          | .           | .      | .     | .       |
| Recurrence                           | 4.70        | 1.92   | 11.52 | 0.001   |
| Not sure                             | 2.51        | 1.27   | 4.96  | 0.008   |
| <b>Time since Diagnosis</b>          |             |        |       |         |
| 1 year                               | REF         |        |       |         |
| 2 years                              | 1.02        | 0.64   | 1.62  | 0.95    |
| 3 years                              | 0.88        | 0.55   | 1.41  | 0.60    |
| 5 years                              | 0.93        | 0.59   | 1.47  | 0.76    |

\*Odds of reporting 'medium' or 'low' QoL EQ5D scores compared to 'high' QoL scores where 'high', 'medium' and 'low' QoL was defined as scores=1,  $0.5 \leq \text{scores} < 1$  and scores<0.5 respectively.

†Amount of physical activity performed each week quantified according to the Chief Medical Officer of England's recommendations<sup>16</sup>

Table 3b. Ordered Logistic Regression Model EQ5D in Colorectal Patients [n=485, pseudoR2=0.18, p&lt;0.001]

| Characteristic                       | Odds Ratio | 95% CI |       | P value |
|--------------------------------------|------------|--------|-------|---------|
| <b>Age (years)</b>                   |            |        |       |         |
| <55 years                            | REF        |        |       |         |
| 55-64                                | 1.28       | 0.59   | 2.75  | 0.53    |
| 65-74                                | 1.16       | 0.57   | 2.35  | 0.69    |
| 75-84                                | 1.23       | 0.57   | 2.64  | 0.59    |
| 85+                                  | 2.45       | 0.93   | 6.41  | 0.07    |
| <b>Sex</b>                           |            |        |       |         |
| Male                                 | REF        |        |       |         |
| Female                               | 1.22       | 0.81   | 1.82  | 0.34    |
| <b>Deprivation</b>                   |            |        |       |         |
| 1 least deprived                     | REF        |        |       |         |
| 2                                    | 0.83       | 0.48   | 1.43  | 0.50    |
| 3                                    | 0.57       | 0.33   | 1.00  | 0.05    |
| 4                                    | 0.62       | 0.34   | 1.13  | 0.12    |
| 5 most deprived                      | 1.17       | 0.58   | 2.34  | 0.66    |
| <b>Physical Activity†</b>            | 0.83       | 0.76   | 0.90  | <0.001  |
| <b>Number of other LTC(excl BP)</b>  |            |        |       |         |
| 0                                    | REF        |        |       |         |
| 1                                    | 2.09       | 1.29   | 3.37  | <0.001  |
| 2+                                   | 4.83       | 2.85   | 8.21  | <0.001  |
| <b>Treatment*</b>                    |            |        |       |         |
| Surgery only                         | REF        |        |       |         |
| Radio+Chemo+Surgery                  | 1.15       | 0.60   | 2.21  | 0.67    |
| Chemo+Surgery                        | 1.35       | 0.85   | 2.17  | 0.21    |
| Other                                | 1.58       | 0.77   | 3.22  | 0.21    |
| <b>Ethnicity</b>                     |            |        |       |         |
| White                                | REF        |        |       |         |
| Mixed                                | 1.72       | 0.24   | 12.42 | 0.59    |
| Asian                                | 1.99       | 0.46   | 8.54  | 0.36    |
| Black                                | 1.14       | 0.26   | 4.92  | 0.86    |
| Other                                | 1.72       | 0.24   | 12.42 | 0.59    |
| <b>Disease Status</b>                |            |        |       |         |
| Remission                            | REF        |        |       |         |
| Rx but present                       | 7.03       | 2.44   | 20.21 | <0.001  |
| Not treated                          | 0.16       | 0.01   | 2.63  | 0.20    |
| Recurrence                           | 4.56       | 1.54   | 13.49 | 0.01    |
| Not sure                             | 2.67       | 1.23   | 5.79  | 0.01    |
| <b>Stoma</b>                         |            |        |       |         |
| No                                   | REF        |        |       |         |
| Yes                                  | 1.32       | 0.80   | 2.19  | 0.27    |
| <b>Difficulty Controlling Bowels</b> |            |        |       |         |
| No                                   | REF        |        |       |         |
| Yes                                  | 2.30       | 1.43   | 3.72  | <0.001  |
| <b>Leak Urine</b>                    |            |        |       |         |
| No                                   | REF        |        |       |         |
| Yes                                  | 1.41       | 0.87   | 2.30  | 0.16    |
| <b>Time since Diagnosis</b>          |            |        |       |         |
| 1 year                               | REF        |        |       |         |
| 2 years                              | 0.72       | 0.42   | 1.22  | 0.22    |
| 3 years                              | 1.03       | 0.59   | 1.81  | 0.92    |
| 5 years                              | 0.85       | 0.49   | 1.48  | 0.56    |

1  
2  
3 \*Odds of reporting 'medium' or 'low' QoL EQ5D scores compared to 'high' QoL scores where 'high', 'medium'  
4 and 'low' QoL was defined as scores=1,  $0.5 \leq \text{scores} < 1$  and  $\text{scores} < 0.5$  respectively.  
5

6 †Amount of physical activity performed each week quantified according to the Chief Medical Officer of  
7 England's recommendations<sup>16</sup>  
8  
9  
10  
11  
12  
13  
14  
15  
16  
17  
18  
19  
20  
21  
22  
23  
24  
25  
26  
27  
28  
29  
30  
31  
32  
33  
34  
35  
36  
37  
38  
39  
40  
41  
42  
43  
44  
45  
46  
47  
48  
49  
50  
51  
52  
53  
54  
55  
56  
57  
58  
59  
60

For peer review only

Table 3c. Ordered Logistic Regression Model EQ5D in NHL Patients [n=614, pseudoR2=0.15 p&lt;0.001]

| Characteristic                            | Odds Ratio | 95% CI |       | P value |
|-------------------------------------------|------------|--------|-------|---------|
| <b>Age (years)</b>                        |            |        |       |         |
| <55 years                                 | REF        |        |       |         |
| 55-64                                     | 0.89       | 0.55   | 1.45  | 0.65    |
| 65-74                                     | 1.23       | 0.75   | 1.99  | 0.41    |
| 75-84                                     | 1.60       | 0.94   | 2.73  | 0.08    |
| 85+                                       | 2.13       | 0.84   | 5.39  | 0.11    |
| <b>Sex</b>                                |            |        |       |         |
| Male                                      | REF        |        |       |         |
| Female                                    | 1.25       | 0.89   | 1.74  | 0.19    |
| <b>Deprivation</b>                        |            |        |       |         |
| 1 least deprived                          | REF        |        |       |         |
| 2                                         | 1.06       | 0.67   | 1.69  | 0.80    |
| 3                                         | 1.21       | 0.75   | 1.95  | 0.43    |
| 4                                         | 1.64       | 0.97   | 2.76  | 0.07    |
| 5 most deprived                           | 1.19       | 0.65   | 2.21  | 0.57    |
| Physical Activity†                        | 0.91       | 0.84   | 0.98  | 0.01    |
| <b>Number of other LTC (excluding BP)</b> |            |        |       |         |
| 0                                         | REF        |        |       |         |
| 1                                         | 2.16       | 1.44   | 3.24  | <0.001  |
| 2+                                        | 7.26       | 4.51   | 11.69 | <0.001  |
| <b>Treatment*</b>                         |            |        |       |         |
| Chemo only                                | REF        |        |       |         |
| Radio+Chemo                               | 0.81       | 0.47   | 1.41  | 0.46    |
| Chemo + Antibody                          | 0.93       | 0.55   | 1.59  | 0.80    |
| Radio+Chemo+Other                         | 1.55       | 0.87   | 2.77  | 0.14    |
| Other                                     | 0.96       | 0.63   | 1.46  | 0.86    |
| <b>Ethnicity</b>                          |            |        |       |         |
| White                                     | REF        |        |       |         |
| Mixed                                     | 2.78       | 0.28   | 27.7  | 0.38    |
| Asian                                     | 0.68       | 0.29   | 1.59  | 0.38    |
| Black                                     | 0.91       | 0.33   | 2.49  | 0.85    |
| Other                                     | 0.61       | 0.09   | 4.39  | 0.62    |
| <b>Disease Status</b>                     |            |        |       |         |
| Remission                                 | REF        |        |       |         |
| Rx but present                            | 2.57       | 1.52   | 4.33  | <0.001  |
| Not treated                               | 0.83       | 0.17   | 3.96  | 0.82    |
| Recurrence                                | 3.73       | 1.68   | 8.29  | 0.001   |
| Not sure                                  | 3.04       | 1.58   | 5.84  | 0.001   |
| <b>Time since Diagnosis</b>               |            |        |       |         |
| 1 year                                    | REF        |        |       |         |
| 2 years                                   | 0.62       | 0.38   | 0.99  | 0.05    |
| 3 years                                   | 0.60       | 0.38   | 0.96  | 0.03    |
| 5 years                                   | 0.57       | 0.36   | 0.90  | 0.02    |

\*Odds of reporting 'medium' or 'low' QoL EQ5D scores compared to 'high' QoL scores where 'high', 'medium' and 'low' QoL was defined as scores=1,  $0.5 \leq \text{scores} < 1$  and  $\text{scores} < 0.5$  respectively.

†Amount of physical activity performed each week quantified according to the Chief Medical Officer of England's recommendations<sup>16</sup>

Table 3d. Ordered Logistic Regression Model EQ5D in Prostate Patients [n=524, pseudoR2=0.22 p&lt;0.001]

| Characteristic                       | Odds Ratio | 95% CI |        | P value |
|--------------------------------------|------------|--------|--------|---------|
| <b>Age (years)</b>                   |            |        |        |         |
| <55 years                            | REF        |        |        |         |
| 55-64                                | 1.32       | 0.41   | 4.30   | 0.64    |
| 65-74                                | 1.72       | 0.55   | 5.38   | 0.36    |
| 75-84                                | 1.32       | 0.41   | 4.30   | 0.64    |
| 85+                                  | 1.92       | 0.42   | 8.78   | 0.40    |
| <b>Deprivation</b>                   |            |        |        |         |
| 1 least deprived                     | REF        |        |        |         |
| 2                                    | 1.09       | 0.64   | 1.85   | 0.74    |
| 3                                    | 1.19       | 0.68   | 2.08   | 0.55    |
| 4                                    | 1.61       | 0.88   | 2.95   | 0.13    |
| 5 most deprived                      | 2.57       | 1.31   | 5.04   | 0.01    |
| Physical Activity†                   | 0.82       | 0.75   | 0.88   | <0.001  |
| <b>Number of other LTC(excl BP)</b>  |            |        |        |         |
| 0                                    | REF        |        |        |         |
| 1                                    | 1.55       | 0.94   | 2.54   | 0.09    |
| 2+                                   | 4.28       | 2.62   | 7.01   | <0.001  |
| <b>Treatment*</b>                    |            |        |        |         |
| Radio+Hormone                        | REF        |        |        |         |
| Surgery only                         | 0.39       | 0.21   | 0.71   | <0.001  |
| Hormone only                         | 1.68       | 0.85   | 3.33   | 0.14    |
| Radio only                           | 0.94       | 0.53   | 1.66   | 0.83    |
| Active surveillance only             | 1.16       | 0.47   | 2.88   | 0.75    |
| Other                                | .          | .      | .      | .       |
| <b>Ethnicity</b>                     |            |        |        |         |
| White                                | REF        |        |        |         |
| Mixed                                | 3.82       | 0.07   | 203.44 | 0.51    |
| Asian                                | 3.21       | 0.56   | 18.49  | 0.19    |
| Black                                | 2.54       | 0.96   | 6.73   | 0.06    |
| Other                                | 0.00       | 0.00   | .      | 0.98    |
| <b>Disease Status</b>                |            |        |        |         |
| Remission                            | REF        |        |        |         |
| Rx but present                       | 1.75       | 0.94   | 3.26   | 0.08    |
| Not treated                          | 1.06       | 0.37   | 3.05   | 0.91    |
| Recurrence                           | 1.71       | 0.17   | 16.91  | 0.65    |
| Not sure                             | 1.48       | 0.85   | 2.58   | 0.17    |
| <b>Urinary Leakage</b>               |            |        |        |         |
| No                                   | REF        |        |        |         |
| Yes                                  | 3.52       | 2.32   | 5.35   | <0.001  |
| <b>Erectile Dysfunction</b>          |            |        |        |         |
| No                                   | REF        |        |        |         |
| Yes                                  | 1.46       | 0.96   | 2.23   | 0.08    |
| <b>Difficulty Controlling Bowels</b> |            |        |        |         |
| No                                   | REF        |        |        |         |
| Yes                                  | 1.62       | 0.90   | 2.92   | 0.10    |
| <b>Time since Diagnosis</b>          |            |        |        |         |
| 1 year                               | REF        |        |        |         |
| 2 years                              | 0.83       | 0.50   | 1.40   | 0.49    |
| 3 years                              | 0.80       | 0.47   | 1.36   | 0.41    |
| 5 years                              | 0.77       | 0.45   | 1.33   | 0.36    |

1  
2  
3  
4  
5  
6  
7  
8  
9  
10  
11  
12  
13  
14  
15  
16  
17  
18  
19  
20  
21  
22  
23  
24  
25  
26  
27  
28  
29  
30  
31  
32  
33  
34  
35  
36  
37  
38  
39  
40  
41  
42  
43  
44  
45  
46  
47  
48  
49  
50  
51  
52  
53  
54  
55  
56  
57  
58  
59  
60

\*Odds of reporting 'medium' or 'low' QoL EQ5D scores compared to 'high' QoL scores where 'high', 'medium' and 'low' QoL was defined as scores=1,  $0.5 \leq \text{scores} < 1$  and  $\text{scores} < 0.5$  respectively.

†Amount of physical activity performed each week quantified according to the Chief Medical Officer of England's recommendations<sup>16</sup>

For peer review only

**Table 4. Comparison of Quality of Life scores with other population data**

|                                 | Health Survey for England (HSE 2008) <sup>34</sup> |                 | GP Population Survey (GPPS) <sup>35</sup> | GP Population Survey (GPPS) <sup>35</sup> | This survey |                          |
|---------------------------------|----------------------------------------------------|-----------------|-------------------------------------------|-------------------------------------------|-------------|--------------------------|
|                                 | All ages                                           | Ages ≥ 45 years | All                                       | No LTC                                    | All         | In remission with no LTC |
| Number of respondents           | 14116                                              | 7672            | 426933                                    | 193285                                    | 3300        | 848                      |
| Median age                      | 48                                                 | 63              | 48                                        | 39                                        | 69.3        | 63.2                     |
| 'High' QOL (Scores=1)           | 56.0%                                              | 45.4%           | 50.6%                                     | 73.8%                                     | 32.0%       | 51.4%                    |
| 'Medium' QOL (0.5 ≤ Scores < 1) | 37.7%                                              | 45.6%           | 41.6%                                     | 25.2%                                     | 52.6%       | 44.3%                    |
| 'Low' QOL (Scores < 0.5)        | 6.3%                                               | 9.0%            | 7.8%                                      | 0.9%                                      | 10.5%       | 2.1%                     |

Supplementary Table 1. Quality of Life Dimension Results (EQ5D) by Cancer Sub group

| EQ5D dimension                                                 |                                | Breast<br>(n=854) |      | Colorectal<br>(n=802) |      | Non<br>Hodgkin's<br>Lymphoma<br>(n=778) |      | Prostate<br>(n=866) |      | Total<br>(n=3300) |      |
|----------------------------------------------------------------|--------------------------------|-------------------|------|-----------------------|------|-----------------------------------------|------|---------------------|------|-------------------|------|
|                                                                |                                | n                 | %    | n                     | %    | n                                       | %    | n                   | %    | n                 | %    |
| <b>Mobility</b><br>$\chi^2=51.3$ ,<br>$p<0.001$                | No Problems                    | 567               | 66.4 | 442                   | 55.1 | 427                                     | 54.9 | 535                 | 61.8 | 1971              | 59.7 |
|                                                                | Slight Problems                | 105               | 12.3 | 159                   | 19.8 | 140                                     | 18.0 | 131                 | 15.1 | 535               | 16.2 |
|                                                                | Moderate Problems              | 107               | 12.5 | 120                   | 15.0 | 120                                     | 15.4 | 97                  | 11.2 | 444               | 13.5 |
|                                                                | Severe Problems                | 46                | 5.4  | 57                    | 7.1  | 71                                      | 9.1  | 69                  | 8.0  | 243               | 7.4  |
|                                                                | Cannot walk                    | 8                 | 0.9  | 13                    | 1.6  | 6                                       | 0.8  | 4                   | 0.4  | 31                | 0.9  |
|                                                                | Missing                        | 21                | 2.5  | 11                    | 1.4  | 14                                      | 1.8  | 30                  | 3.5  | 76                | 2.3  |
| <b>Self Care</b><br>$\chi^2=30.4$ ,<br>$p=0.002$               | No Problems                    | 716               | 83.8 | 651                   | 81.2 | 611                                     | 78.5 | 704                 | 81.3 | 2682              | 81.3 |
|                                                                | Slight Problems                | 47                | 5.5  | 67                    | 8.4  | 66                                      | 8.5  | 78                  | 9.0  | 258               | 7.8  |
|                                                                | Moderate Problems              | 45                | 5.3  | 46                    | 5.7  | 71                                      | 9.1  | 44                  | 5.1  | 206               | 6.2  |
|                                                                | Severe Problems                | 12                | 1.4  | 18                    | 2.2  | 12                                      | 1.5  | 9                   | 1.0  | 51                | 1.5  |
|                                                                | Cannot wash/dress              | 6                 | 0.7  | 9                     | 1.1  | 4                                       | 0.5  | 4                   | 0.5  | 23                | 0.7  |
|                                                                | Missing                        | 28                | 3.3  | 11                    | 1.4  | 14                                      | 1.8  | 27                  | 3.1  | 80                | 2.4  |
| <b>Usual<br/>Activities</b><br>$\chi^2=34.5$ ,<br>$p<0.001$    | No Problems                    | 513               | 60.1 | 429                   | 53.5 | 411                                     | 52.8 | 533                 | 61.5 | 1886              | 57.2 |
|                                                                | Slight Problems                | 162               | 19.0 | 173                   | 21.6 | 156                                     | 20.1 | 145                 | 16.7 | 636               | 19.3 |
|                                                                | Moderate Problems              | 111               | 13.0 | 113                   | 14.1 | 127                                     | 16.3 | 104                 | 12.1 | 455               | 13.7 |
|                                                                | Severe Problems                | 31                | 3.6  | 48                    | 6.0  | 49                                      | 6.3  | 43                  | 5.0  | 171               | 5.2  |
|                                                                | Cannot do usual activities     | 14                | 1.6  | 24                    | 3.0  | 26                                      | 3.3  | 15                  | 1.7  | 79                | 2.4  |
|                                                                | Missing                        | 23                | 2.7  | 15                    | 1.8  | 9                                       | 1.2  | 26                  | 3.0  | 73                | 2.2  |
| <b>Pain</b><br>$\chi^2=134.3$ ,<br>$p<0.001$                   | No Pain                        | 329               | 38.5 | 429                   | 53.5 | 408                                     | 52.4 | 526                 | 60.7 | 1692              | 51.3 |
|                                                                | Slight Pain                    | 341               | 39.9 | 220                   | 27.4 | 180                                     | 23.1 | 169                 | 19.5 | 910               | 27.6 |
|                                                                | Moderate Pain                  | 113               | 13.2 | 92                    | 11.5 | 120                                     | 15.4 | 101                 | 11.7 | 426               | 12.9 |
|                                                                | Severe Pain                    | 39                | 4.6  | 35                    | 4.4  | 51                                      | 6.6  | 38                  | 4.4  | 163               | 4.9  |
|                                                                | Extreme Pain                   | 5                 | 0.6  | 9                     | 1.1  | 10                                      | 1.3  | 3                   | 0.3  | 27                | 0.8  |
|                                                                | Missing                        | 27                | 3.2  | 17                    | 2.1  | 9                                       | 1.2  | 29                  | 3.3  | 82                | 2.5  |
| <b>Anxiety/<br/>depression</b><br>$\chi^2=37.1$ ,<br>$p<0.001$ | No anxiety/depression          | 475               | 55.6 | 504                   | 62.8 | 464                                     | 59.6 | 566                 | 65.4 | 2009              | 60.9 |
|                                                                | Slight anxiety/depression      | 241               | 28.2 | 196                   | 24.4 | 186                                     | 23.9 | 183                 | 21.1 | 806               | 24.4 |
|                                                                | Moderate<br>anxiety/depression | 78                | 9.1  | 78                    | 9.7  | 83                                      | 10.7 | 76                  | 8.8  | 315               | 9.5  |
|                                                                | Severe anxiety/depression      | 21                | 2.5  | 6                     | 0.8  | 21                                      | 2.7  | 8                   | 0.9  | 56                | 1.7  |
|                                                                | Extreme<br>anxiety/depression  | 10                | 1.2  | 4                     | 0.5  | 8                                       | 1.0  | 4                   | 0.5  | 26                | 0.8  |
|                                                                | Missing                        | 29                | 3.4  | 14                    | 1.8  | 16                                      | 2.1  | 29                  | 3.3  | 88                | 2.7  |



Supplementary Table 2 Quality of Life Dimension Results (EQ5D) by time since diagnosis of cancer

|                           |                             | 1 year<br>(n=848)         |      | 2 years<br>(n=834) |      | 3 years<br>(n=806) |      | 5 years<br>(n=812) |      | Total<br>(n=3300) |      |      |
|---------------------------|-----------------------------|---------------------------|------|--------------------|------|--------------------|------|--------------------|------|-------------------|------|------|
|                           |                             | N                         | %    | N                  | %    | N                  | %    | N                  | %    | N                 | %    |      |
| <b>Mobility</b>           | No Problems                 | 521                       | 61.4 | 501                | 60.1 | 486                | 60.3 | 463                | 57.0 | 1971              | 59.7 |      |
|                           | $\chi^2=21.1, p=0.05$       | Slight Problems           | 150  | 17.7               | 123  | 14.7               | 127  | 15.8               | 135  | 16.6              | 535  | 16.2 |
|                           | Moderate Problems           | 93                        | 11.0 | 116                | 13.9 | 104                | 12.9 | 131                | 13.1 | 444               | 13.5 |      |
|                           | Severe Problems             | 62                        | 7.3  | 62                 | 7.4  | 56                 | 6.9  | 63                 | 7.8  | 243               | 7.4  |      |
|                           | Cannot walk                 | 2                         | 0.2  | 8                  | 9.6  | 13                 | 1.6  | 8                  | 1.0  | 31                | 0.9  |      |
|                           | Missing                     | 20                        | 2.4  | 24                 | 2.9  | 20                 | 2.5  | 12                 | 1.5  | 76                | 2.3  |      |
| <b>Self Care</b>          | No Problems                 | 696                       | 82.1 | 674                | 80.8 | 659                | 81.8 | 653                | 80.4 | 2682              | 81.3 |      |
|                           | $\chi^2=10.2, p=0.59$       | Slight Problems           | 59   | 6.9                | 65   | 7.8                | 61   | 7.6                | 73   | 9.0               | 258  | 7.8  |
|                           | Moderate Problems           | 57                        | 6.7  | 56                 | 6.7  | 42                 | 5.2  | 51                 | 6.3  | 206               | 6.2  |      |
|                           | Severe Problems             | 12                        | 1.4  | 12                 | 1.4  | 14                 | 1.7  | 13                 | 1.6  | 51                | 1.5  |      |
|                           | Cannot wash/dress           | 3                         | 0.4  | 4                  | 0.5  | 10                 | 1.2  | 6                  | 0.7  | 23                | 0.7  |      |
|                           | Missing                     | 21                        | 2.5  | 23                 | 2.8  | 20                 | 2.5  | 16                 | 2.0  | 80                | 2.4  |      |
| <b>Usual Activities</b>   | No Problems                 | 465                       | 54.8 | 474                | 56.8 | 465                | 57.7 | 482                | 59.4 | 1886              | 57.2 |      |
|                           | $\chi^2=13.9, p=0.31$       | Slight Problems           | 181  | 21.3               | 157  | 18.8               | 161  | 20.0               | 137  | 16.9              | 636  | 19.3 |
|                           | Moderate Problems           | 131                       | 15.4 | 112                | 13.4 | 95                 | 11.8 | 117                | 14.4 | 455               | 13.7 |      |
|                           | Severe Problems             | 35                        | 4.1  | 45                 | 5.4  | 44                 | 5.5  | 47                 | 5.8  | 171               | 5.2  |      |
|                           | Cannot do usual activities  | 18                        | 2.1  | 19                 | 2.3  | 23                 | 2.8  | 19                 | 2.3  | 79                | 2.4  |      |
|                           | Missing                     | 18                        | 2.1  | 27                 | 3.2  | 18                 | 2.2  | 10                 | 1.2  | 73                | 2.2  |      |
| <b>Pain</b>               | No Pain                     | 421                       | 49.6 | 412                | 49.4 | 435                | 54.0 | 424                | 52.2 | 1692              | 51.3 |      |
|                           | $\chi^2=18.0, p=0.12$       | Slight Pain               | 262  | 30.9               | 237  | 28.4               | 198  | 24.6               | 213  | 26.2              | 910  | 27.6 |
|                           | Moderate Pain               | 101                       | 11.9 | 112                | 13.4 | 105                | 13.0 | 108                | 13.3 | 426               | 12.9 |      |
|                           | Severe Pain                 | 34                        | 4.0  | 44                 | 5.3  | 38                 | 4.7  | 47                 | 5.8  | 163               | 4.9  |      |
|                           | Extreme Pain                | 7                         | 0.8  | 6                  | 0.7  | 11                 | 1.4  | 3                  | 0.4  | 27                | 0.8  |      |
|                           | Missing                     | 23                        | 2.7  | 23                 | 2.8  | 19                 | 2.4  | 17                 | 2.1  | 82                | 2.5  |      |
| <b>Anxiety/depression</b> | No anxiety/depression       | 466                       | 55.0 | 505                | 60.6 | 499                | 61.9 | 539                | 66.4 | 2009              | 60.9 |      |
|                           | $\chi^2=25.8, p=0.01$       | Slight anxiety/depression | 244  | 28.8               | 195  | 23.4               | 196  | 24.3               | 171  | 21.1              | 806  | 24.4 |
|                           | Moderate anxiety/depression | 88                        | 10.4 | 86                 | 10.3 | 68                 | 8.4  | 73                 | 9.0  | 315               | 9.5  |      |
|                           | Severe anxiety/depression   | 20                        | 2.4  | 13                 | 1.5  | 13                 | 1.6  | 10                 | 1.2  | 56                | 1.7  |      |
|                           | Extreme anxiety/depression  | 6                         | 0.7  | 8                  | 1.0  | 6                  | 0.7  | 6                  | 0.7  | 26                | 0.8  |      |
|                           | Missing                     | 24                        | 2.8  | 27                 | 3.2  | 24                 | 3.0  | 13                 | 1.6  | 88                | 2.7  |      |

Supplementary Table 3. EQ5D outcome category by the number of Long Term Conditions (LTC) in patients in remission

| EQ5D Categories | High QoL (Scores=1) |             | Medium QoL (0.5≤Scores<1) |             | Low QoL (Scores<0.5) |            | Missing   |            | Total        |
|-----------------|---------------------|-------------|---------------------------|-------------|----------------------|------------|-----------|------------|--------------|
|                 | n                   | %           | n                         | %           | n                    | %          | n         | %          |              |
| No LTC          | 436                 | 51.4        | 376                       | 44.3        | 18                   | 2.1        | 18        | 2.1        | 848          |
| 1 LTC           | 250                 | 36.2        | 378                       | 54.7        | 40                   | 5.8        | 23        | 3.3        | 691          |
| ≥2 LTC          | 129                 | 18.8        | 419                       | 60.9        | 119                  | 17.3       | 21        | 3.1        | 688          |
| <b>Total</b>    | <b>815</b>          | <b>36.6</b> | <b>1,173</b>              | <b>52.7</b> | <b>177</b>           | <b>7.9</b> | <b>62</b> | <b>2.8</b> | <b>2,227</b> |

Supplementary Table 4. EQ5D outcome category by the number of Long Term Conditions (LTC) in patients not in remission

| EQ5D Categories | High QoL (Scores=1) |             | Medium QoL (0.5≤Scores<1) |             | Low QoL (Scores<0.5) |             | Missing   |            | Total      |
|-----------------|---------------------|-------------|---------------------------|-------------|----------------------|-------------|-----------|------------|------------|
|                 | n                   | %           | n                         | %           | n                    | %           | n         | %          |            |
| No LTC          | 79                  | 33.9        | 130                       | 55.8        | 15                   | 6.4         | 9         | 3.9        | 233        |
| 1 LTC           | 64                  | 23.1        | 175                       | 63.2        | 25                   | 9.0         | 13        | 4.7        | 277        |
| ≥2 LTC          | 37                  | 11.9        | 166                       | 53.2        | 94                   | 30.1        | 15        | 4.8        | 312        |
| <b>Total</b>    | <b>180</b>          | <b>21.9</b> | <b>471</b>                | <b>57.3</b> | <b>134</b>           | <b>16.3</b> | <b>37</b> | <b>4.5</b> | <b>822</b> |

Supplementary Table 5. Fear of Dying and Recurrence of Disease by Time since Diagnosis

| Fear of Dying             | Yes%         |             | No           |             | Missing    |            | Total        |
|---------------------------|--------------|-------------|--------------|-------------|------------|------------|--------------|
|                           | n            | %           | n            | %           | n          | %          |              |
| 1 year ago                | 256          | 30.2        | 542          | 63.9        | 50         | 5.9        | 848          |
| 2 years ago               | 233          | 27.9        | 543          | 65.1        | 58         | 7.0        | 834          |
| 3 years ago               | 214          | 26.6        | 531          | 65.9        | 61         | 7.6        | 806          |
| 5 years ago               | 180          | 22.2        | 583          | 71.8        | 49         | 6.0        | 812          |
| <b>Total</b>              | <b>883</b>   | <b>26.8</b> | <b>2,199</b> | <b>66.6</b> | <b>218</b> | <b>6.6</b> | <b>3,300</b> |
| <b>Fear of Recurrence</b> | <b>n</b>     | <b>%</b>    | <b>n</b>     | <b>%</b>    | <b>n</b>   | <b>%</b>   |              |
| 1 year ago                | 437          | 51.5        | 369          | 43.5        | 42         | 5.0        | 848          |
| 2 years ago               | 403          | 48.3        | 398          | 47.7        | 33         | 4.0        | 834          |
| 3 years ago               | 376          | 46.7        | 384          | 47.6        | 46         | 5.7        | 806          |
| 5 years ago               | 345          | 42.5        | 427          | 52.6        | 40         | 4.9        | 812          |
| <b>Total</b>              | <b>1,561</b> | <b>47.3</b> | <b>1,578</b> | <b>47.8</b> | <b>161</b> | <b>4.9</b> | <b>3,300</b> |

Supplementary Figure 1. Distribution of EQ5D summary scores by cancer sub-type

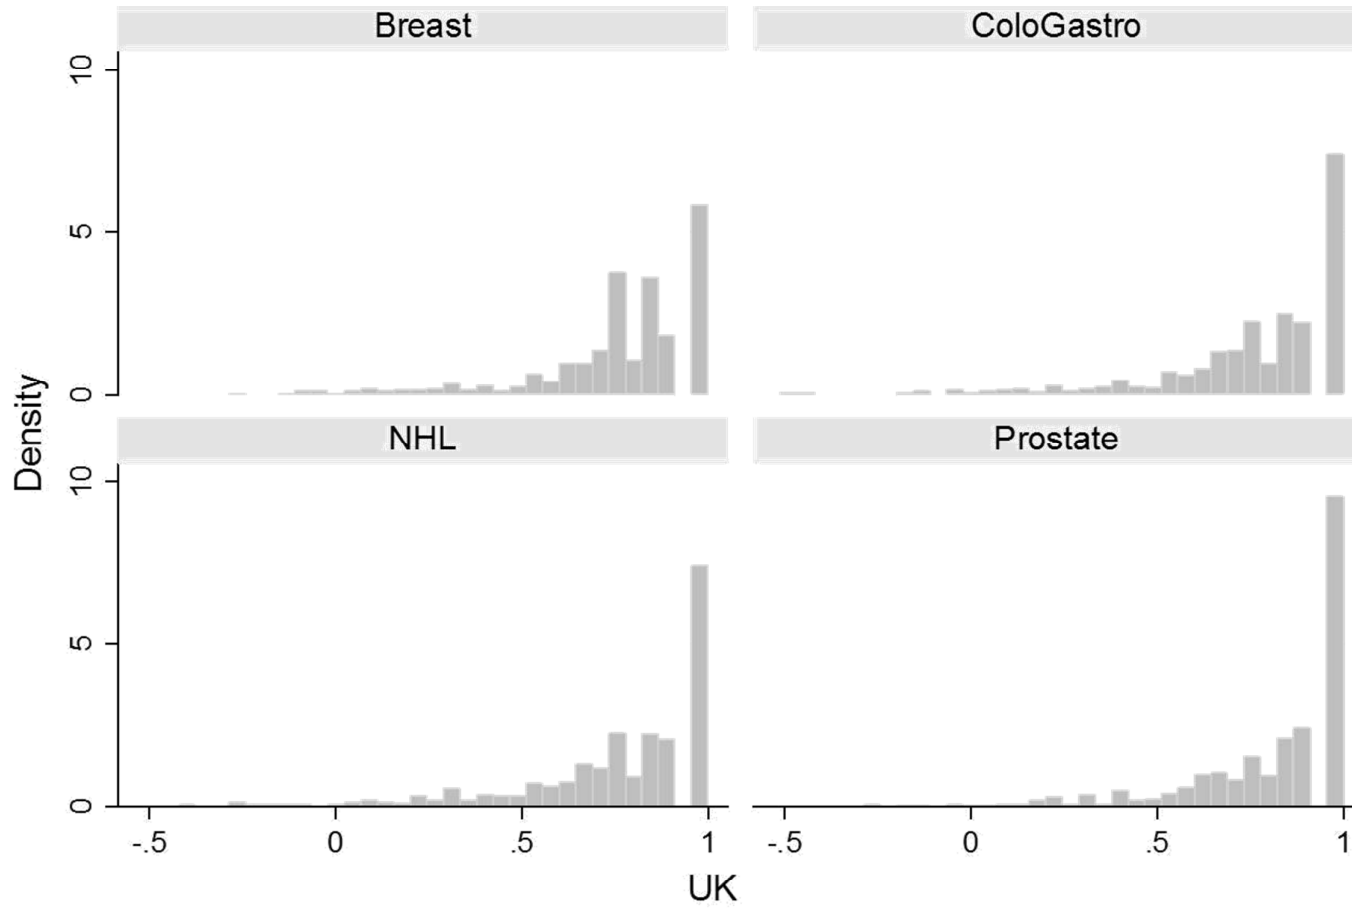

Graphs by tumour group

## References

1. Maddams J, Brewster D, Gavin A, Steward J, Elliott J, Utley M, et al. Cancer prevalence in the United Kingdom: estimates for 2008. *British Journal of Cancer* 2009;101(3):541-47.
2. Elliott J, Fallows A, Staetsky L, Smith PWF, Foster CL, Maher EJ, et al. The health and well-being of cancer survivors in the UK: findings from a population-based survey. *British Journal of Cancer* 2011;105:S11-S20.
3. Lipscomb J, Gotay CC, Snyder CE. Patient-reported outcomes in cancer: A review of recent research and policy initiatives. *CA-a Cancer Journal for Clinicians* 2007;57(5):278-300.
4. Richards M, Corner J, Maher J. The National Cancer Survivorship Initiative: new and emerging evidence on the ongoing needs of cancer survivors. *British Journal of Cancer* 2011;105:S1-S4.
5. Garcia SF, Cella D, Clauser SB, Flynn KE, Lad T, Lai J-S, et al. Standardizing patient-reported outcomes assessment in cancer clinical trials: A patient-reported outcomes measurement information system initiative. *Journal of Clinical Oncology* 2007;25(32):5106-12.
6. Bode RK, Hahn EA, DeVellis R, Cella D, Patient-Reported Outcomes M. Measuring Participation: The Patient-Reported Outcomes Measurement Information System Experience. *Archives of Physical Medicine and Rehabilitation* 2010;91(9):S60-S65.
7. van de Poll-Franse LV, Horevoorts N, van Eenbergen M, Denollet J, Roukema JA, Aaronson NK, et al. The Patient Reported Outcomes Following Initial treatment and Long term Evaluation of Survivorship registry: Scope, rationale and design of an infrastructure for the study of physical and psychosocial outcomes in cancer survivorship cohorts. *European Journal of Cancer* 2011;47(14):2188-94.
8. Den Oudsten BL, Traa MJ, Thong MSY, Martijn H, De Hingh IHJT, Bosscha K, et al. Higher prevalence of sexual dysfunction in colon and rectal cancer survivors compared with the normative population: A population-based study. *European Journal of Cancer* 2012; 48(17):3161-70.
9. Hoffman RM, Hunt WC, Gilliland FD, Stephenson RA, Potosky AL. Patient satisfaction with treatment decisions for clinically localized prostate carcinoma. Results from the prostate cancer outcomes study. *Cancer* 2003;97(7):1653-62.
10. Potosky AL, Davis WW, Hoffman RM, Stanford JL, Stephenson RA, Penson DF, et al. Five-year outcomes after prostatectomy or radiotherapy for prostate cancer: The prostate cancer outcomes study. *Journal of the National Cancer Institute* 2004;96(18):1358-67.
11. Ayanian JZ, Zaslavsky AM, Arora NK, Kahn KL, Malin JL, Ganz PA, et al. Patients' Experiences With Care for Lung Cancer and Colorectal Cancer: Findings From the Cancer Care Outcomes Research and Surveillance Consortium. *Journal of Clinical Oncology* 2010;28(27):4154-61.
12. Department of Health. National Cancer Patient Experience Survey Programme - 2010 National Survey Report, 2010.
13. Davies N, Gibbons E, Mackintosh A, Fitzpatrick R. A Structured Review of Patient Reported Outcomes Measures (PROMS) for Breast Cancer, Report to the Department of Health. In: Patient Reported Outcomes Measurement Group, editor. Oxford, 2009.

14. Morris C, Gibbons E, Fitzpatrick R. A Structured Review of Patient Reported Outcome Measures (PROMS) for Prostate Cancer, Report to the Department of Health. In: Patient-Reported Outcomes Measurement Group, editor. Oxford, 2009.
15. Hadi M, Gibbons E, Fitzpatrick R. A Structured Review of Patient Reported Outcome Measures (PROMS) for Colorectal Cancer, Report to the Department of Health. In: Group PROM, editor. Oxford, 2009.
16. Department of Health. Start Active, Stay Active: A report on physical activity from the four home countries' Chief Medical Officers London, 2011.
17. The EuroQol Group. EuroQol-a new facility for the measurement of health-related quality of life. *Health Policy* 1990;16(3):199-208.
18. Herdman M, Gudex C, Lloyd A, Janssen M, Kind P, Parkin D, et al. Development and preliminary testing of the new five-level version of EQ-5D (EQ-5D-5L). *Quality of Life Research* 2011;20:1727-36.
19. Wright EP, Kiely M, Johnston C, Smith AB, Cull A, Selby PJ. Development and evaluation of an instrument to assess social difficulties in routine oncology practice. *Quality of Life Research* 2005;14(2):373-86.
20. Wright P, Smith A, Brown S, Brown J, Roberts K. Measuring social difficulties: Clinical meaning and utility of the Social Difficulties Inventory (SDI). *Psycho-Oncology* 2006;15(2):S436-S37.
21. Wright P, Smith AB, Keding A, Velikova G. The Social Difficulties Inventory (SDI): development of subscales and scoring guidance for staff. *Psycho-Oncology* 2011;20(1):36-43.
22. Sheldon H, Sizmur S. An evaluation of the National Cancer Survivorship Initiative test community projects: Picker Institute Europe, 2010.
23. Girgis A, Lambert S, Lecathelinais C. The supportive care needs survey for partners and caregivers of cancer survivors: development and psychometric evaluation. *Psycho-Oncology* 2011;20(4):387-93.
24. Ashley L, Jones H, Thomas J, Forman D, Newsham A, Morris E, et al. Integrating cancer survivors' experiences into UK cancer registries: design and development of the ePOCS system (electronic Patient-reported Outcomes from Cancer Survivors). *British Journal of Cancer* 2011;105:S74-S81.
25. Webster K, Cella D, Yost K. The Functional Assessment of Chronic Illness Therapy (FACIT) Measurement System: properties, applications, and interpretation. *Health and Quality of Life Outcomes*. 2003;1:79.
26. Department for Communities and Local Government. English Indices of Multiple Deprivation 2010: Crown copyright, 2011.
27. van Hout B, Janssen MF, Feng Y-S, Kohlmann T, Busschbach J, Golicki D, Lloyd A, Scalone L, Kind P, Pickard AS. Interim Scoring for the EQ-5D-5L: Mapping the EQ-5D-5L to EQ-5D-3L Value Sets. *Value in Health* 2012;15:708-715..
28. Judd CM, McLelland GH, Ryan CS. *Data Analysis: A Model Comparison Approach*. Second ed: Routledge, 2008.
29. National Research Ethics Service. Differentiating audit, service evaluation and research version 1.1, 2006. Available via <http://www.nres.nhs.uk/EasysiteWeb/getresource.axd?AssetID=340&type=full&servicetype=Attachment>; last accessed 22 January 2013.
30. Ganz PA, Land SR, Antonio C, Zheng P, Yothers G, Petersen L, et al. Cancer survivorship research: the challenge of recruiting adult long term cancer survivors from a

- 1  
2  
3 cooperative clinical trials group. *Journal of Cancer Survivorship-Research and Practice*  
4 2009;3(3):137-47.
- 5 31. Moller H, Richards S, Hanchett N, Riaz SP, Luechtenborg M, Holmberg L, et al.  
6 Completeness of case ascertainment and survival time error in English cancer  
7 registries: impact on 1-year survival estimates. *British Journal of Cancer*  
8 2011;105(1):170-76.
- 9 32. King MT, Viney R, Smith DP, Hossain I, Street D, Savage E, et al. Survival gains needed to  
10 offset persistent adverse treatment effects in localised prostate cancer. *British*  
11 *Journal of Cancer* 2012;106(4):638-45.
- 12 33. Markland AD, Goode PS, Redden DT, Borrud LG, Burgio KL. Prevalence of Urinary  
13 Incontinence in Men: Results From the National Health and Nutrition Examination  
14 Survey. *Journal of Urology* 2010;184(3):1022-27.
- 15 34. Craig R, Mindell J, Hirani V, editors. Health Survey for England 2008. London: National  
16 Centre of Social Research; 2009. (Series HS no. 18)..
- 17 35. Department of Health. The GP Patient Survey, 2012. Available via [http://www.gp-](http://www.gp-patient.co.uk/results)  
18 [patient.co.uk/results](http://www.gp-patient.co.uk/results); last accessed 22 January 2013.
- 19 36. Eakin EG, Youlden DR, Baade PD, Lawler SP, Reeves MM, Heyworth JS, et al. Health  
20 status of long-term cancer survivors: Results from an Australian population-based  
21 sample. *Cancer Epidemiology Biomarkers & Prevention* 2006;15(10):1969-76.
- 22 37. Kenfield SA, Stampfer MJ, Giovannucci E, Chan JM. Physical Activity and Survival After  
23 Prostate Cancer Diagnosis in the Health Professionals Follow-Up Study. *Journal of*  
24 *Clinical Oncology* 2011;29(6):726-32.
- 25 38. Barbieri JM, Greenberg DC, Wright KA, Brown CH, Palmer C, Neal DE, et al. The  
26 association of diagnosis in the private or NHS sector on prostate cancer stage and  
27 treatment. *Journal of Public Health* 2012;34(1):108-14.
- 28 39. Department of Health. NHS Outcomes Framework 2012-13, 2011. Available via  
29 [https://www.wp.dh.gov.uk/publications/files/2012/11/121109-NHS-Outcomes-](https://www.wp.dh.gov.uk/publications/files/2012/11/121109-NHS-Outcomes-Framework-2013-14.pdf)  
30 [Framework-2013-14.pdf](https://www.wp.dh.gov.uk/publications/files/2012/11/121109-NHS-Outcomes-Framework-2013-14.pdf); last accessed 22 January 2013.
- 31  
32  
33  
34  
35  
36  
37  
38  
39  
40  
41  
42  
43  
44  
45  
46  
47  
48  
49  
50  
51  
52  
53  
54  
55  
56  
57  
58  
59  
60

| <b>Supplementary File 1</b> | <b>ICD10 Codes included in the Study</b> |
|-----------------------------|------------------------------------------|
| Breast Cancer               | ICD10 Codes C50 & D05                    |
| Colorectal/Lower G.I.       | ICD10 Codes C18, C19, C20, and C21       |
| Non-Hodgkin's Lymphoma      | ICD10 Codes C82, C83, C84 & C85          |
| Prostate                    | ICD10 Code C61                           |

For peer review only



## Living with and beyond Breast Cancer

This questionnaire is about your health and quality of life since being diagnosed with your cancer. Its purpose is to provide information which can help the NHS monitor and improve the quality of health services for future patients.

### Who should complete the questionnaire?

The questions should be answered by the person named in the letter enclosed with this questionnaire. If that person needs help to complete the questionnaire, the answers should be given from their point of view – not the point of view of the person who is helping.

### Completing the questionnaire

For each question please tick clearly inside the box that is closest to your views using a black or blue pen. Don't worry if you make a mistake; simply cross out the mistake and put a tick in the correct box. Please **do not** write your name or address anywhere on the questionnaire.

### IMPORTANT INFORMATION

To make sure the information we collect is useful, we need to collect some personal details from you and to access information held about you in other NHS databases. The purpose of collecting this information is to generate aggregated statistics about the quality of life for people who are living with and beyond cancer. These statistics will be used to compare the differences in quality of life for people treated for different types of cancer by different providers and to understand what may be causing these. The results will be used to measure and improve the quality of healthcare services.

**By completing this questionnaire you are giving your consent for the information provided to be used for the above purposes. Specifically, you are agreeing that:**

- Your personal details and relevant health information can be held and used by an organisation contracted to the Department of Health to analyse the data
- Other information about you held by the Patient Demographics Service, the Secondary Users Service, Cancer Registries and other NHS databases can be held and used by an organisation contracted to the Department of Health to analyse the data
- Your personal details can be used to send you related follow-up questionnaires in the future

Your personal information will be handled securely and anonymised after analysis and before any publication.

Your personal information will not be released by the Department of Health or third party organisations working on its behalf unless required by law or where there is a clear overriding public interest.

You can withdraw the information you give the NHS in this questionnaire upon request, up to the point at which data are analysed and personal details removed.

If you have any queries about the questionnaire,  
please call the FREEPHONE helpline number on **0800 783 1775**

**Taking part in this survey is voluntary**  
**Published reports will not contain any personal details**



## YOUR HEALTH TODAY

*The questions in this section are all about your health and how you feel on the day you complete this questionnaire.*

1. What treatments have you received for your breast cancer? **(Tick all that apply)**

- 1  Radiotherapy
- 2  Chemotherapy (excluding hormone treatment)
- 3  Hormone treatment
- 4  Surgery

2. How long is it since you completed your **initial treatment** for breast cancer? *Treatment includes any chemotherapy, radiotherapy, or surgery for your breast cancer. When answering this question please do not include hormone treatments such as Tamoxifen.*

- 1  I am still having my initial treatment
- 2  It is less than 3 months since my initial treatment
- 3  It is between 3 and 12 months since my initial treatment
- 4  It is between 1 and 5 years since my initial treatment
- 5  It is more than 5 years since my initial treatment
- 6  Don't know / can't remember

3. How has your breast cancer responded to treatment?

- 1  My breast cancer has responded fully to treatment (I am in remission)
- 2  My breast cancer has been treated but is still present
- 3  My breast cancer has not been treated at all
- 4  My breast cancer has come back after it was originally treated
- 5  I am not certain what is happening with my breast cancer

4. If you have had breast surgery, do any of the following apply to you? **(Tick all that apply)**

- 1  I have had a lumpectomy
- 2  I have had a mastectomy
- 3  I have had breast reconstruction
- 4  I am awaiting or considering breast reconstruction
- 5  None of these apply to me

# YOUR HEALTH TODAY

Under each heading, please tick the ONE box that best describes your health TODAY.

## 5. MOBILITY

- I have no problems in walking about <sub>1</sub>
- I have slight problems in walking about <sub>2</sub>
- I have moderate problems in walking about <sub>3</sub>
- I have severe problems in walking about <sub>4</sub>
- I am unable to walk about <sub>5</sub>

## 6. SELF CARE

- I have no problems washing or dressing myself <sub>1</sub>
- I have slight problems washing or dressing myself <sub>2</sub>
- I have moderate problems washing or dressing myself <sub>3</sub>
- I have severe problems washing or dressing myself <sub>4</sub>
- I am unable to wash or dress myself <sub>5</sub>

## 7. USUAL ACTIVITIES (*work, study, housework, family or leisure activities*)

- I have no problems doing my usual activities <sub>1</sub>
- I have slight problems doing my usual activities <sub>2</sub>
- I have moderate problems doing my usual activities <sub>3</sub>
- I have severe problems doing my usual activities <sub>4</sub>
- I am unable to do my usual activities <sub>5</sub>

## 8. PAIN / DISCOMFORT

- I have no pain or discomfort <sub>1</sub>
- I have slight pain or discomfort <sub>2</sub>
- I have moderate pain or discomfort <sub>3</sub>
- I have severe pain or discomfort <sub>4</sub>
- I have extreme pain or discomfort <sub>5</sub>

## 9. ANXIETY / DEPRESSION

- I am not anxious or depressed <sub>1</sub>
- I am slightly anxious or depressed <sub>2</sub>
- I am moderately anxious or depressed <sub>3</sub>
- I am severely anxious or depressed <sub>4</sub>
- I am extremely anxious or depressed <sub>5</sub>

# YOUR HEALTH AND WELLBEING IN THE LAST 7 DAYS

**The questions in this section are about your health and how you have felt in the past 7 days.**

Please mark one box per line to give your response.

| <i>During the past 7 days:</i>                                                                                                                                                                                                                                                                                                                                       | <b>Not at all</b>          | <b>A little bit</b>        | <b>Some-what</b>           | <b>Quite a bit</b>         | <b>Very much</b>           |                            |                            |                            |
|----------------------------------------------------------------------------------------------------------------------------------------------------------------------------------------------------------------------------------------------------------------------------------------------------------------------------------------------------------------------|----------------------------|----------------------------|----------------------------|----------------------------|----------------------------|----------------------------|----------------------------|----------------------------|
| <b>10.</b> I have been short of breath                                                                                                                                                                                                                                                                                                                               | 1 <input type="checkbox"/> | 2 <input type="checkbox"/> | 3 <input type="checkbox"/> | 4 <input type="checkbox"/> | 5 <input type="checkbox"/> |                            |                            |                            |
| <b>11.</b> I am self conscious about the way I dress                                                                                                                                                                                                                                                                                                                 | 1 <input type="checkbox"/> | 2 <input type="checkbox"/> | 3 <input type="checkbox"/> | 4 <input type="checkbox"/> | 5 <input type="checkbox"/> |                            |                            |                            |
| <b>12.</b> One or both of my arms are swollen or tender                                                                                                                                                                                                                                                                                                              | 1 <input type="checkbox"/> | 2 <input type="checkbox"/> | 3 <input type="checkbox"/> | 4 <input type="checkbox"/> | 5 <input type="checkbox"/> |                            |                            |                            |
| <b>13.</b> I feel sexually attractive                                                                                                                                                                                                                                                                                                                                | 1 <input type="checkbox"/> | 2 <input type="checkbox"/> | 3 <input type="checkbox"/> | 4 <input type="checkbox"/> | 5 <input type="checkbox"/> |                            |                            |                            |
| <b>14.</b> I am bothered by hair loss                                                                                                                                                                                                                                                                                                                                | 1 <input type="checkbox"/> | 2 <input type="checkbox"/> | 3 <input type="checkbox"/> | 4 <input type="checkbox"/> | 5 <input type="checkbox"/> |                            |                            |                            |
| <b>15.</b> I worry that other members of my family might someday get the same illness I have                                                                                                                                                                                                                                                                         | 1 <input type="checkbox"/> | 2 <input type="checkbox"/> | 3 <input type="checkbox"/> | 4 <input type="checkbox"/> | 5 <input type="checkbox"/> |                            |                            |                            |
| <b>16.</b> I worry about the effect of stress on my illness                                                                                                                                                                                                                                                                                                          | 1 <input type="checkbox"/> | 2 <input type="checkbox"/> | 3 <input type="checkbox"/> | 4 <input type="checkbox"/> | 5 <input type="checkbox"/> |                            |                            |                            |
| <b>17.</b> I am bothered by a change in weight                                                                                                                                                                                                                                                                                                                       | 1 <input type="checkbox"/> | 2 <input type="checkbox"/> | 3 <input type="checkbox"/> | 4 <input type="checkbox"/> | 5 <input type="checkbox"/> |                            |                            |                            |
| <b>18.</b> I have certain parts of my body where I experience pain                                                                                                                                                                                                                                                                                                   | 1 <input type="checkbox"/> | 2 <input type="checkbox"/> | 3 <input type="checkbox"/> | 4 <input type="checkbox"/> | 5 <input type="checkbox"/> |                            |                            |                            |
| <b>19.</b> In the <b>past week</b> , on how many days have you done a total of 30 minutes or more of physical activity, which was enough to raise your heart rate? <i>This may include sport, exercise and brisk walking or cycling for recreation or to get to and from places, but should not include housework or physical activity that is part of your job.</i> |                            |                            |                            |                            |                            |                            |                            |                            |
|                                                                                                                                                                                                                                                                                                                                                                      | <b>None</b>                | <b>1 day</b>               | <b>2 days</b>              | <b>3 days</b>              | <b>4 days</b>              | <b>5 days</b>              | <b>6 days</b>              | <b>7 days</b>              |
|                                                                                                                                                                                                                                                                                                                                                                      | 1 <input type="checkbox"/> | 2 <input type="checkbox"/> | 3 <input type="checkbox"/> | 4 <input type="checkbox"/> | 5 <input type="checkbox"/> | 6 <input type="checkbox"/> | 7 <input type="checkbox"/> | 8 <input type="checkbox"/> |

## YOUR HEALTH AND WELL BEING IN THE LAST MONTH

**The questions in this section are about your health and how you have felt during the past month.**

Sometimes people who have, or have had cancer find that they have a number of everyday difficulties to cope with following their diagnosis. These might be to do with things like their family life, social activities, finances and work.

**Please tick the response that best describes your answer.**

| <i>During the past month:</i>                                                                                                                 | No difficulty              | A little                   | Quite a bit                | Very much                  | Does not apply             |
|-----------------------------------------------------------------------------------------------------------------------------------------------|----------------------------|----------------------------|----------------------------|----------------------------|----------------------------|
| 20. Have you had any difficulty in maintaining your independence?                                                                             | 1 <input type="checkbox"/> | 2 <input type="checkbox"/> | 3 <input type="checkbox"/> | 4 <input type="checkbox"/> | 5 <input type="checkbox"/> |
| 21. Have you had any difficulty in carrying out your domestic chores? (e.g. cleaning, gardening, cooking, shopping)                           | 1 <input type="checkbox"/> | 2 <input type="checkbox"/> | 3 <input type="checkbox"/> | 4 <input type="checkbox"/> | 5 <input type="checkbox"/> |
| 22. Have you had any difficulty with managing your own personal care? (e.g. bathing, dressing, washing)                                       | 1 <input type="checkbox"/> | 2 <input type="checkbox"/> | 3 <input type="checkbox"/> | 4 <input type="checkbox"/> | 5 <input type="checkbox"/> |
| 23. Have you had any difficulty with looking after those who depend on you? (e.g. children, dependent adults, pets)                           | 1 <input type="checkbox"/> | 2 <input type="checkbox"/> | 3 <input type="checkbox"/> | 4 <input type="checkbox"/> | 5 <input type="checkbox"/> |
| 24. Have any of those close to you (e.g. partner, children, parents) had any difficulty with the support available to them?                   | 1 <input type="checkbox"/> | 2 <input type="checkbox"/> | 3 <input type="checkbox"/> | 4 <input type="checkbox"/> | 5 <input type="checkbox"/> |
| 25. Have you had any difficulty with benefits? (e.g. statutory sick pay, attendance allowance, disability living allowance)                   | 1 <input type="checkbox"/> | 2 <input type="checkbox"/> | 3 <input type="checkbox"/> | 4 <input type="checkbox"/> | 5 <input type="checkbox"/> |
| 26. Have you had any financial difficulties?                                                                                                  | 1 <input type="checkbox"/> | 2 <input type="checkbox"/> | 3 <input type="checkbox"/> | 4 <input type="checkbox"/> | 5 <input type="checkbox"/> |
| 27. Have you had any difficulty with financial services? (e.g. loans, mortgages, pensions, insurance)                                         | 1 <input type="checkbox"/> | 2 <input type="checkbox"/> | 3 <input type="checkbox"/> | 4 <input type="checkbox"/> | 5 <input type="checkbox"/> |
| 28. Have you had any difficulty concerning your work? (or education if you are a student)                                                     | 1 <input type="checkbox"/> | 2 <input type="checkbox"/> | 3 <input type="checkbox"/> | 4 <input type="checkbox"/> | 5 <input type="checkbox"/> |
| 29. Have you had any difficulty with planning for your own or your family's future? (e.g. care of dependents, legal issues, business affairs) | 1 <input type="checkbox"/> | 2 <input type="checkbox"/> | 3 <input type="checkbox"/> | 4 <input type="checkbox"/> | 5 <input type="checkbox"/> |

# YOUR HEALTH AND WELL BEING IN THE LAST MONTH

1  
2  
3  
4  
5  
6  
7  
8  
9  
10  
11  
12  
13  
14  
15  
16  
17  
18  
19  
20  
21  
22  
23  
24  
25  
26  
27  
28  
29  
30  
31  
32  
33  
34  
35  
36  
37  
38  
39  
40  
41  
42  
43  
44  
45  
46  
47  
48  
49  
50  
51  
52  
53  
54  
55  
56  
57  
58  
59  
60

*During the past month:*

No difficulty      A little      Quite a bit      Very much      Does not apply

- 30. Have you had any difficulty with communicating with those closest to you? (e.g. partner, children, parents)      1       2       3       4       5
- 31. Have you had any difficulty with communicating with others? (e.g. friends, neighbours, colleagues, dates)      1       2       3       4       5
- 32. Have you had any difficulty concerning sexual matters?      1       2       3       4       5
- 33. Have you had any difficulty concerning plans to have a family?      1       2       3       4       5
- 34. Have you had any difficulty concerning your appearance or body image?      1       2       3       4       5
- 35. Have you felt isolated?      1       2       3       4       5
- 36. Have you had any difficulty with getting around? (e.g. transport, car parking, your mobility)      1       2       3       4       5
- 37. Have you had any difficulty with where you live? (e.g. space, access, damp, heating, neighbours, security)      1       2       3       4       5
- 38. Have you had any difficulty in carrying out your recreational activities? (e.g. hobbies, pastimes, social pursuits)      1       2       3       4       5
- 39. Have you had any difficulty with your plans to travel or take a holiday?      1       2       3       4       5
- 40. Have you had any difficulty with any other area of your everyday life?      1       2       3       4       5

## YOUR HEALTH AND WELL BEING IN THE LAST MONTH

*The questions in this section are about your health and how you have felt during the past month.*

Please tick the response that best describes your answer.

|                                              | Strongly agree             | Agree                      | Neither agree nor disagree | Disagree                   | Strongly disagree          | Does not apply to me       |
|----------------------------------------------|----------------------------|----------------------------|----------------------------|----------------------------|----------------------------|----------------------------|
| 41. I have fears about my cancer spreading   | 1 <input type="checkbox"/> | 2 <input type="checkbox"/> | 3 <input type="checkbox"/> | 5 <input type="checkbox"/> | 5 <input type="checkbox"/> | 6 <input type="checkbox"/> |
| 42. I have fears about my cancer coming back | 1 <input type="checkbox"/> | 2 <input type="checkbox"/> | 3 <input type="checkbox"/> | 5 <input type="checkbox"/> | 5 <input type="checkbox"/> | 6 <input type="checkbox"/> |
| 43. I have fears about death and dying       | 1 <input type="checkbox"/> | 2 <input type="checkbox"/> | 3 <input type="checkbox"/> | 5 <input type="checkbox"/> | 5 <input type="checkbox"/> |                            |
| 44. I experience memory loss                 | 1 <input type="checkbox"/> | 2 <input type="checkbox"/> | 3 <input type="checkbox"/> | 5 <input type="checkbox"/> | 5 <input type="checkbox"/> |                            |
| 45. I have trouble sleeping                  | 1 <input type="checkbox"/> | 2 <input type="checkbox"/> | 3 <input type="checkbox"/> | 5 <input type="checkbox"/> | 5 <input type="checkbox"/> |                            |
| 46. I have trouble concentrating             | 1 <input type="checkbox"/> | 2 <input type="checkbox"/> | 3 <input type="checkbox"/> | 5 <input type="checkbox"/> | 5 <input type="checkbox"/> |                            |
| 47. I always feel tired                      | 1 <input type="checkbox"/> | 2 <input type="checkbox"/> | 3 <input type="checkbox"/> | 5 <input type="checkbox"/> | 5 <input type="checkbox"/> |                            |
| 48. I experience mood swings                 | 1 <input type="checkbox"/> | 2 <input type="checkbox"/> | 3 <input type="checkbox"/> | 5 <input type="checkbox"/> | 5 <input type="checkbox"/> |                            |
| 49. I am often irritable                     | 1 <input type="checkbox"/> | 2 <input type="checkbox"/> | 3 <input type="checkbox"/> | 5 <input type="checkbox"/> | 5 <input type="checkbox"/> |                            |

## OVERALL SUPPORT AND CARE

1  
2  
3 **50.** Do you have an up-to-date written care  
4 plan? *A care plan is a document that sets*  
5 *out your needs and goals for caring for*  
6 *your cancer.*  
7

- 8  Yes, definitely  
9  
10  Yes, I think so  
11  
12  No  
13  
14  I do not need a care plan  
15  
16  Don't know  
17

18  
19 **51.** Do you have a named nurse who you can  
20 contact if you have a worry about your  
21 cancer care? *A named nurse is sometimes*  
22 *known as a Clinical Nurse Specialist or*  
23 *Specialist Cancer Nurse.*  
24  
25

- 26  Yes  
27  
28  No  
29  
30  Don't know  
31  
32

33 **52.** Do you know who to contact if you have a  
34 concern about any aspect of living with or  
35 after cancer?  
36

- 37  Yes, definitely  
38  
39  Yes, I think so  
40  
41  No  
42  
43

44  
45 **53.** Do you think that hospital staff did  
46 everything they could to support you  
47 following your cancer treatment?  
48

- 49  Yes, all of the time  
50  
51  Only some of the time  
52  
53  Never  
54  
55  I did not need any support  
56  
57  
58  
59  
60

**54.** Do you think that GPs and nurses at your  
general practice do everything they can to  
support you following your cancer  
treatment?

- Yes, all of the time  
 Only some of the time  
 Never  
 My general practice is not involved  
 I do not need any support

**55.** Following your initial cancer treatment  
have you been given enough care and help  
from health and social services (for  
example, district nurses, home helps or  
occupational therapists)?

- Yes, definitely  
 Yes, to some extent  
 No  
 I did not need help from health or social  
services  
 Don't know / can't remember

**56.** Would it have been helpful to have had  
more advice or information on any of the  
following issues: **(Tick all that apply)**

- Diet and lifestyle  
 Physical activity and exercise  
 Financial help or benefits  
 Free prescriptions  
 Returning to or staying in work  
 Information / advice for family / friends /  
carer  
 The physical aspects of living with and  
after cancer (e.g. side effects or signs  
of recurrence)  
 The psychological or emotional aspects  
of living with and after cancer  
 I have all the information and advice I  
need



## ABOUT YOU

**If you are helping someone to complete this questionnaire, please make sure this information is the patient's and not your own.**

**57.** What year were you born?

(Please write in) e.g. 

|   |   |   |   |
|---|---|---|---|
| 1 | 9 | 4 | 4 |
|---|---|---|---|

|   |   |   |   |
|---|---|---|---|
| Y | Y | Y | Y |
|---|---|---|---|

**58.** Are you male or female?

- 1  Male  
2  Female

**59.** Which of the following best describes your sexual orientation?

- 1  Heterosexual / straight (opposite sex)  
2  Bisexual (both sexes)  
3  Lesbian (same sex)  
4  Other  
5  Prefer not to answer

**60.** Which statement best describes your living arrangements?

- 1  I live with partner/spouse/family/friends  
2  I live alone  
3  I live in a nursing home, hospital or other long term care home  
4  Other

**61.** Do you have a long standing health condition? *Please include anything other than your cancer that has troubled you over a period of time or that could affect you over a period of time.*

- 1  Yes  
2  No  
3  Don't know / can't say

**62.** Which, if any, of the following conditions do you have? **(Tick all that apply)**

- 1  Alzheimer's disease or dementia  
2  Angina  
3  Arthritis  
4  Asthma or other chronic chest problem  
5  Blindness or visual impairment  
6  Deafness or hearing impairment  
7  Diabetes  
8  Epilepsy  
9  Heart condition  
10  High blood pressure  
11  Kidney disease  
12  Learning difficulty  
13  Liver disease  
14  Long term back problems  
15  Long-standing mental health problem  
16  Long-standing neurological problem  
17  Another long-standing condition  
18  I do not have any of these conditions



1  
2  
3  
4  
5  
6  
7  
8  
9  
10  
11  
12  
13  
14  
15  
16  
17  
18  
19  
20  
21  
22  
23  
24  
25  
26  
27  
28  
29  
30  
31  
32  
33  
34  
35  
36  
37  
38  
39  
40  
41  
42  
43  
44  
45  
46  
47  
48  
49  
50  
51  
52  
53  
54  
55  
56  
57  
58  
59  
60

**63.** What was your employment status *before you were diagnosed with cancer?*

- 1  Full time employment
- 2  Part time employment
- 3  Homemaker
- 4  Student (in education)
- 5  Retired
- 6  Unemployed – and seeking work
- 7  Unemployed – unable to work for health reasons
- 8  Other

**64.** What is your employment status currently? *If on maternity or sick leave answer in relation to your usual employment status*

- 1  Full time employment
- 2  Part time employment
- 3  Homemaker
- 4  Student (in education)
- 5  Retired
- 6  Unemployed – and seeking work
- 7  Unemployed – unable to work for health reasons
- 8  Other

**65.** If you are currently employed at the moment, are you:

- 1  Not working at all
- 2  Working less hours than usual
- 3  Working your usual hours
- 4  Working more hours than usual
- 5  This question does not apply to me

**66.** To which of these ethnic groups would you say you belong? (Tick ONE only)

**a. WHITE**

- 1  British
- 2  Irish
- 3  Any other White background (Please write in box)

**b. MIXED**

- 4  White and Black Caribbean
- 5  White and Black African
- 6  White and Asian
- 7  Any other Mixed background (Please write in box)

**c. ASIAN OR ASIAN BRITISH**

- 8  Indian
- 9  Pakistani
- 10  Bangladeshi
- 11  Any other Asian background (Please write in box)

**d. BLACK OR BLACK BRITISH**

- 12  Caribbean
- 13  African
- 14  Any other Black background (Please write in box)

**e. CHINESE OR OTHER ETHNIC GROUP**

- 15  Chinese
- 16  Any other ethnic group (Please write in box)

## COMMENTS

If you have anything else you would like to tell us about living with and beyond cancer, please do so here:

1  
2  
3  
4  
5  
6  
7  
8  
9  
10  
11  
12  
13  
14  
15  
16  
17  
18  
19  
20  
21  
22  
23  
24  
25  
26  
27  
28  
29  
30  
31  
32  
33  
34  
35  
36  
37  
38  
39  
40  
41  
42  
43  
44  
45  
46  
47  
48  
49  
50  
51  
52  
53  
54



Questions 5-9 are EQ- 5D-5L. UK (English) v.2 © 2009 EuroQol Group. EQ-5D™ is a trade mark of the EuroQol Group.

Questions 10 – 18 are from FACIT copyright 1987, 1997 by David Cella, PhD

Questions 20 – 40 are from the Social Difficulties Inventory. Originators of the Social Difficulties Inventory: Wright, E.P., Cull, A. and Selby, P.



## Living with and beyond Colorectal / Gastro Intestinal Cancer

This questionnaire is about your health and quality of life since being diagnosed with your cancer. Its purpose is to provide information which can help the NHS monitor and improve the quality of health services for future patients.

### Who should complete the questionnaire?

The questions should be answered by the person named in the letter enclosed with this questionnaire. If that person needs help to complete the questionnaire, the answers should be given from their point of view – not the point of view of the person who is helping.

### Completing the questionnaire

For each question please tick clearly inside the box that is closest to your views using a black or blue pen. Don't worry if you make a mistake; simply cross out the mistake and put a tick in the correct box. Please **do not** write your name or address anywhere on the questionnaire.

### IMPORTANT INFORMATION

To make sure the information we collect is useful, we need to collect some personal details from you and to access information held about you in other NHS databases. The purpose of collecting this information is to generate aggregated statistics about the quality of life for people who are living with and beyond cancer. These statistics will be used to compare the differences in quality of life for people treated for different types of cancer by different providers and to understand what may be causing these. The results will be used to measure and improve the quality of healthcare services.

**By completing this questionnaire you are giving your consent for the information provided to be used for the above purposes. Specifically, you are agreeing that:**

- Your personal details and relevant health information can be held and used by an organisation contracted to the Department of Health to analyse the data
- Other information about you held by the Patient Demographics Service, the Secondary Users Service, Cancer Registries and other NHS databases can be held and used by an organisation contracted to the Department of Health to analyse the data
- Your personal details can be used to send you related follow-up questionnaires in the future

Your personal information will be handled securely and anonymised after analysis and before any publication.

Your personal information will not be released by the Department of Health or third party organisations working on its behalf unless required by law or where there is a clear overriding public interest.

You can withdraw the information you give the NHS in this questionnaire upon request, up to the point at which data are analysed and personal details removed.

If you have any queries about the questionnaire,  
please call the FREEPHONE helpline number on **0800 783 1775**

**Taking part in this survey is voluntary**  
**Published reports will not contain any personal details**

## YOUR HEALTH TODAY

*The questions in this section are all about your health and how you feel on the day you complete this questionnaire.*

1. What treatments have you received for your colorectal / GI cancer? **(Tick all that apply)**

1 Radiotherapy

2 Chemotherapy

3 Surgery

2. How long is it since you completed your **initial treatment** for colorectal / GI cancer? *Treatment includes any chemotherapy, radiotherapy, or surgery for your colorectal / GI cancer.*

1 I am still having my initial treatment

2 It is less than 3 months since my initial treatment

3 It is between 3 and 12 months since my initial treatment

4 It is between 1 and 5 years since my initial treatment

5 It is more than 5 years since my initial treatment

6 Don't know / can't remember

3. How has your colorectal / GI cancer responded to treatment?

1 My colorectal / GI cancer has responded fully to treatment (I am in remission)

2 My colorectal / GI cancer has been treated but is still present

3 My colorectal / GI cancer has not been treated at all

4 My colorectal / GI cancer has come back after it was originally treated

5 I am not certain what is happening with my colorectal / GI cancer

4. If you have a stoma (e.g. colostomy) is it:

1 Still present

2 Reversed

3 This does not apply to me

# YOUR HEALTH TODAY

Under each heading, please tick the **ONE** box that best describes your health **TODAY**.

## ) . MOBILITY

- I have no problems in walking about <sub>1</sub>
- I have slight problems in walking about <sub>2</sub>
- I have moderate problems in walking about <sub>3</sub>
- I have severe problems in walking about <sub>4</sub>
- I am unable to walk about <sub>5</sub>

## \*. SELF CARE

- I have no problems washing or dressing myself <sub>1</sub>
- I have slight problems washing or dressing myself <sub>2</sub>
- I have moderate problems washing or dressing myself <sub>3</sub>
- I have severe problems washing or dressing myself <sub>4</sub>
- I am unable to wash or dress myself <sub>5</sub>

## + . USUAL ACTIVITIES (*work, study, housework, family or leisure activities*)

- I have no problems doing my usual activities <sub>1</sub>
- I have slight problems doing my usual activities <sub>2</sub>
- I have moderate problems doing my usual activities <sub>3</sub>
- I have severe problems doing my usual activities <sub>4</sub>
- I am unable to do my usual activities <sub>5</sub>

## , . PAIN / DISCOMFORT

- I have no pain or discomfort <sub>1</sub>
- I have slight pain or discomfort <sub>2</sub>
- I have moderate pain or discomfort <sub>3</sub>
- I have severe pain or discomfort <sub>4</sub>
- I have extreme pain or discomfort <sub>5</sub>

## - . ANXIETY / DEPRESSION

- I am not anxious or depressed <sub>1</sub>
- I am slightly anxious or depressed <sub>2</sub>
- I am moderately anxious or depressed <sub>3</sub>
- I am severely anxious or depressed <sub>4</sub>
- I am extremely anxious or depressed <sub>5</sub>

For peer review only - <http://bmjopen.bmj.com/site/about/guidelines.xhtml>

# YOUR HEALTH AND WELL BEING IN THE LAST 7 DAYS

*The questions in this section are about your health and how you have felt in the past 7 days.*

Please mark one box per line to give your response.

**During the past 7 days:**

|                                                          | Not at all                    | A little bit               | Some-what                      | Quite a bit                | Very much                  |
|----------------------------------------------------------|-------------------------------|----------------------------|--------------------------------|----------------------------|----------------------------|
| <b>1\$.</b> I have swelling or cramps in my stomach area | 1 <input type="checkbox"/>    | 2 <input type="checkbox"/> | 3 <input type="checkbox"/>     | 4 <input type="checkbox"/> | 5 <input type="checkbox"/> |
| <b>1%</b> I am losing weight                             | 1 <input type="checkbox"/>    | 2 <input type="checkbox"/> | 3 <input type="checkbox"/>     | 4 <input type="checkbox"/> | 5 <input type="checkbox"/> |
| <b>1&amp;</b> I have control of my bowels                | 1 <input type="checkbox"/>    | 2 <input type="checkbox"/> | 3 <input type="checkbox"/>     | 4 <input type="checkbox"/> | 5 <input type="checkbox"/> |
| <b>1' .</b> I can digest my food well                    | 1 <input type="checkbox"/>    | 2 <input type="checkbox"/> | 3 <input type="checkbox"/>     | 4 <input type="checkbox"/> | 5 <input type="checkbox"/> |
| <b>1( .</b> I have diarrhoea                             | 1 <input type="checkbox"/>    | 2 <input type="checkbox"/> | 3 <input type="checkbox"/>     | 4 <input type="checkbox"/> | 5 <input type="checkbox"/> |
| <b>1) .</b> I have a good appetite                       | 1 <input type="checkbox"/>    | 2 <input type="checkbox"/> | 3 <input type="checkbox"/>     | 4 <input type="checkbox"/> | 5 <input type="checkbox"/> |
| <b>1* .</b> I like the appearance of my body             | 1 <input type="checkbox"/>    | 2 <input type="checkbox"/> | 3 <input type="checkbox"/>     | 4 <input type="checkbox"/> | 5 <input type="checkbox"/> |
| <b>1+.</b> I have difficulty urinating                   | 1 <input type="checkbox"/>    | 2 <input type="checkbox"/> | 3 <input type="checkbox"/>     | 4 <input type="checkbox"/> | 5 <input type="checkbox"/> |
| <b>% .</b> I urinate more frequently than usual          | 1 <input type="checkbox"/>    | 2 <input type="checkbox"/> | 3 <input type="checkbox"/>     | 4 <input type="checkbox"/> | 5 <input type="checkbox"/> |
| <b>% .</b> I leak urine                                  | 1 <input type="checkbox"/>    | 2 <input type="checkbox"/> | 3 <input type="checkbox"/>     | 4 <input type="checkbox"/> | 5 <input type="checkbox"/> |
| <b>2\$.</b> Do you have an ostomy appliance / stoma?     | 1 <input type="checkbox"/> No |                            | 2 <input type="checkbox"/> Yes |                            |                            |

If yes, please answer the next two items:

|                                                                                         | Not at all                    | A little bit               | Some-what                      | Quite a bit                | Very much                  |
|-----------------------------------------------------------------------------------------|-------------------------------|----------------------------|--------------------------------|----------------------------|----------------------------|
| <b>2%</b> I am embarrassed by my ostomy appliance / stoma                               | 1 <input type="checkbox"/>    | 2 <input type="checkbox"/> | 3 <input type="checkbox"/>     | 4 <input type="checkbox"/> | 5 <input type="checkbox"/> |
| <b>2&amp;</b> Caring for my ostomy appliance / stoma is difficult                       | 1 <input type="checkbox"/>    | 2 <input type="checkbox"/> | 3 <input type="checkbox"/>     | 4 <input type="checkbox"/> | 5 <input type="checkbox"/> |
| <b>2' .</b> Do you have any difficulty in controlling your bowels (e.g. any accidents)? | 1 <input type="checkbox"/> No |                            | 2 <input type="checkbox"/> Yes |                            |                            |

|                                                         | Monthly                    | Weekly                     | Daily                      | Constantly                 | It varies                  |
|---------------------------------------------------------|----------------------------|----------------------------|----------------------------|----------------------------|----------------------------|
| <b>2( .</b> If yes, how often do you have difficulties? | 1 <input type="checkbox"/> | 2 <input type="checkbox"/> | 3 <input type="checkbox"/> | 4 <input type="checkbox"/> | 5 <input type="checkbox"/> |

**2) .** In the **past week**, on how many days have you done a total of 30 minutes or more of physical activity, which was enough to raise your heart rate? *This may include sport, exercise and brisk walking or cycling for recreation or to get to and from places, but should not include housework or physical activity that is part of your job.*

| None                       | 1 day                      | 2 days                     | 3 days                     | 4 days                     | 5 days                     | 6 days                     | 7 days                     |
|----------------------------|----------------------------|----------------------------|----------------------------|----------------------------|----------------------------|----------------------------|----------------------------|
| 1 <input type="checkbox"/> | 2 <input type="checkbox"/> | 3 <input type="checkbox"/> | 4 <input type="checkbox"/> | 5 <input type="checkbox"/> | 6 <input type="checkbox"/> | 7 <input type="checkbox"/> | 8 <input type="checkbox"/> |

# YOUR HEALTH AND WELL BEING IN THE LAST MONTH

**The questions in this section are about your health and how you have felt during the past month.**

Sometimes people who have, or have had cancer find that they have a number of everyday difficulties to cope with following their diagnosis. These might be to do with things like their family life, social activities, finances and work.

**Please tick the response that best describes your answer.**

| <i>During the past month:</i>                                                                                                                         | No difficulty              | A little                   | Quite a bit                | Very much                  | Does not apply             |
|-------------------------------------------------------------------------------------------------------------------------------------------------------|----------------------------|----------------------------|----------------------------|----------------------------|----------------------------|
| <b>2*</b> . Have you had any difficulty in maintaining your independence?                                                                             | 1 <input type="checkbox"/> | 2 <input type="checkbox"/> | 3 <input type="checkbox"/> | 4 <input type="checkbox"/> | 5 <input type="checkbox"/> |
| <b>2+</b> . Have you had any difficulty in carrying out your domestic chores? (e.g. cleaning, gardening, cooking, shopping)                           | 1 <input type="checkbox"/> | 2 <input type="checkbox"/> | 3 <input type="checkbox"/> | 4 <input type="checkbox"/> | 5 <input type="checkbox"/> |
| <b>&amp; .</b> Have you had any difficulty with managing your own personal care? (e.g. bathing, dressing, washing)                                    | 1 <input type="checkbox"/> | 2 <input type="checkbox"/> | 3 <input type="checkbox"/> | 4 <input type="checkbox"/> | 5 <input type="checkbox"/> |
| <b>&amp;-</b> . Have you had any difficulty with looking after those who depend on you? (e.g. children, dependent adults, pets)                       | 1 <input type="checkbox"/> | 2 <input type="checkbox"/> | 3 <input type="checkbox"/> | 4 <input type="checkbox"/> | 5 <input type="checkbox"/> |
| <b>3\$</b> . Have any of those close to you (e.g. partner, children, parents) had any difficulty with the support available to them?                  | 1 <input type="checkbox"/> | 2 <input type="checkbox"/> | 3 <input type="checkbox"/> | 4 <input type="checkbox"/> | 5 <input type="checkbox"/> |
| <b>3%</b> Have you had any difficulty with benefits? (e.g. statutory sick pay, attendance allowance, disability living allowance)                     | 1 <input type="checkbox"/> | 2 <input type="checkbox"/> | 3 <input type="checkbox"/> | 4 <input type="checkbox"/> | 5 <input type="checkbox"/> |
| <b>3&amp;</b> Have you had any financial difficulties?                                                                                                | 1 <input type="checkbox"/> | 2 <input type="checkbox"/> | 3 <input type="checkbox"/> | 4 <input type="checkbox"/> | 5 <input type="checkbox"/> |
| <b>3'</b> . Have you had any difficulty with financial services? (e.g. loans, mortgages, pensions, insurance)                                         | 1 <input type="checkbox"/> | 2 <input type="checkbox"/> | 3 <input type="checkbox"/> | 4 <input type="checkbox"/> | 5 <input type="checkbox"/> |
| <b>3(.</b> Have you had any difficulty concerning your work? (or education if you are a student)                                                      | 1 <input type="checkbox"/> | 2 <input type="checkbox"/> | 3 <input type="checkbox"/> | 4 <input type="checkbox"/> | 5 <input type="checkbox"/> |
| <b>3)</b> . Have you had any difficulty with planning for your own or your family's future? (e.g. care of dependents, legal issues, business affairs) | 1 <input type="checkbox"/> | 2 <input type="checkbox"/> | 3 <input type="checkbox"/> | 4 <input type="checkbox"/> | 5 <input type="checkbox"/> |



# YOUR HEALTH AND WELL BEING IN THE LAST MONTH

| <i>During the past month:</i> |                                                                                                                     | No difficulty              | A little                   | Quite a bit                | Very much                  | Does not apply             |
|-------------------------------|---------------------------------------------------------------------------------------------------------------------|----------------------------|----------------------------|----------------------------|----------------------------|----------------------------|
| 3*                            | Have you had any difficulty with communicating with those closest to you? (e.g. partner, children, parents)         | 1 <input type="checkbox"/> | 2 <input type="checkbox"/> | 3 <input type="checkbox"/> | 4 <input type="checkbox"/> | 5 <input type="checkbox"/> |
| 3+                            | Have you had any difficulty with communicating with others? (e.g. friends, neighbours, colleagues, dates)           | 1 <input type="checkbox"/> | 2 <input type="checkbox"/> | 3 <input type="checkbox"/> | 4 <input type="checkbox"/> | 5 <input type="checkbox"/> |
| ' , .                         | Have you had any difficulty concerning sexual matters?                                                              | 1 <input type="checkbox"/> | 2 <input type="checkbox"/> | 3 <input type="checkbox"/> | 4 <input type="checkbox"/> | 5 <input type="checkbox"/> |
| ' - .                         | Have you had any difficulty concerning plans to have a family?                                                      | 1 <input type="checkbox"/> | 2 <input type="checkbox"/> | 3 <input type="checkbox"/> | 4 <input type="checkbox"/> | 5 <input type="checkbox"/> |
| 4\$                           | Have you had any difficulty concerning your appearance or body image?                                               | 1 <input type="checkbox"/> | 2 <input type="checkbox"/> | 3 <input type="checkbox"/> | 4 <input type="checkbox"/> | 5 <input type="checkbox"/> |
| 4%                            | Have you felt isolated?                                                                                             | 1 <input type="checkbox"/> | 2 <input type="checkbox"/> | 3 <input type="checkbox"/> | 4 <input type="checkbox"/> | 5 <input type="checkbox"/> |
| 4&                            | Have you had any difficulty with getting around? (e.g. transport, car parking, your mobility)                       | 1 <input type="checkbox"/> | 2 <input type="checkbox"/> | 3 <input type="checkbox"/> | 4 <input type="checkbox"/> | 5 <input type="checkbox"/> |
| 4'                            | Have you had any difficulty with where you live? (e.g. space, access, damp, heating, neighbours, security)          | 1 <input type="checkbox"/> | 2 <input type="checkbox"/> | 3 <input type="checkbox"/> | 4 <input type="checkbox"/> | 5 <input type="checkbox"/> |
| 4( .                          | Have you had any difficulty in carrying out your recreational activities? (e.g. hobbies, pastimes, social pursuits) | 1 <input type="checkbox"/> | 2 <input type="checkbox"/> | 3 <input type="checkbox"/> | 4 <input type="checkbox"/> | 5 <input type="checkbox"/> |
| 4)                            | Have you had any difficulty with your plans to travel or take a holiday?                                            | 1 <input type="checkbox"/> | 2 <input type="checkbox"/> | 3 <input type="checkbox"/> | 4 <input type="checkbox"/> | 5 <input type="checkbox"/> |
| 4*                            | Have you had any difficulty with any other area of your everyday life?                                              | 1 <input type="checkbox"/> | 2 <input type="checkbox"/> | 3 <input type="checkbox"/> | 4 <input type="checkbox"/> | 5 <input type="checkbox"/> |



# YOUR HEALTH AND WELL BEING IN THE LAST MONTH

*The questions in this section are about your health and how you have felt during the past month.*

Please tick the response that best describes your answer.

|                                                      | Strongly agree             | Agree                      | Neither agree nor disagree | Disagree                   | Strongly disagree          | Does not apply to me       |
|------------------------------------------------------|----------------------------|----------------------------|----------------------------|----------------------------|----------------------------|----------------------------|
| <b>4+.</b> I have fears about my cancer spreading    | 1 <input type="checkbox"/> | 2 <input type="checkbox"/> | 3 <input type="checkbox"/> | 4 <input type="checkbox"/> | 5 <input type="checkbox"/> | 6 <input type="checkbox"/> |
| <b>(, .</b> I have fears about my cancer coming back | 1 <input type="checkbox"/> | 2 <input type="checkbox"/> | 3 <input type="checkbox"/> | 4 <input type="checkbox"/> | 5 <input type="checkbox"/> | 6 <input type="checkbox"/> |
| <b>( - .</b> I have fears about death and dying      | 1 <input type="checkbox"/> | 2 <input type="checkbox"/> | 3 <input type="checkbox"/> | 4 <input type="checkbox"/> | 5 <input type="checkbox"/> |                            |
| <b>5\$.</b> I experience memory loss                 | 1 <input type="checkbox"/> | 2 <input type="checkbox"/> | 3 <input type="checkbox"/> | 4 <input type="checkbox"/> | 5 <input type="checkbox"/> |                            |
| <b>5%</b> I have trouble sleeping                    | 1 <input type="checkbox"/> | 2 <input type="checkbox"/> | 3 <input type="checkbox"/> | 4 <input type="checkbox"/> | 5 <input type="checkbox"/> |                            |
| <b>5&amp;.</b> I have trouble concentrating          | 1 <input type="checkbox"/> | 2 <input type="checkbox"/> | 3 <input type="checkbox"/> | 4 <input type="checkbox"/> | 5 <input type="checkbox"/> |                            |
| <b>5' .</b> I always feel tired                      | 1 <input type="checkbox"/> | 2 <input type="checkbox"/> | 3 <input type="checkbox"/> | 4 <input type="checkbox"/> | 5 <input type="checkbox"/> |                            |
| <b>5( .</b> I experience mood swings                 | 1 <input type="checkbox"/> | 2 <input type="checkbox"/> | 3 <input type="checkbox"/> | 4 <input type="checkbox"/> | 5 <input type="checkbox"/> |                            |
| <b>5).</b> I am often irritable                      | 1 <input type="checkbox"/> | 2 <input type="checkbox"/> | 3 <input type="checkbox"/> | 4 <input type="checkbox"/> | 5 <input type="checkbox"/> |                            |

## OVERALL SUPPORT AND CARE

1  
2  
3 **5\***. Do you have an up-to-date written care  
4 plan? *A care plan is a document that sets*  
5 *out your needs and goals for caring for*  
6 *your cancer.*  
7

- 8 1  Yes, definitely  
9  
10 2  Yes, I think so  
11  
12 3  No  
13  
14 4  I do not need a care plan  
15  
16 5  Don't know  
17

18  
19 **5+**. Do you have a named nurse who you can  
20 contact if you have a worry about your  
21 cancer care? *A named nurse is sometimes*  
22 *known as a Clinical Nurse Specialist or*  
23 *Specialist Cancer Nurse.*  
24  
25

- 26 1  Yes  
27  
28 2  No  
29  
30 3  Don't know  
31  
32

33 **), .** Do you know who to contact if you have a  
34 concern about any aspect of living with or  
35 after cancer?  
36

- 37 1  Yes, definitely  
38  
39 2  Yes, I think so  
40  
41 3  No  
42  
43

44  
45 **) - .** Do you think that hospital staff did  
46 everything they could to support you  
47 following your cancer treatment?  
48

- 49 1  Yes, all of the time  
50  
51 2  Only some of the time  
52  
53 3  Never  
54  
55 4  I did not need any support  
56  
57  
58  
59  
60

**6\$.** Do you think that GPs and nurses at your  
general practice do everything they can to  
support you following your cancer  
treatment?

- 1  Yes, all of the time  
2  Only some of the time  
3  Never  
4  My general practice is not involved  
5  I do not need any support

**6%** Following your initial cancer treatment  
have you been given enough care and help  
from health and social services (for  
example, district nurses, home helps or  
occupational therapists)?

- 1  Yes, definitely  
2  Yes, to some extent  
3  No  
4  I did not need help from health or social  
services  
5  Don't know / can't remember

**6&.** Would it have been helpful to have had  
more advice or information on any of the  
following issues: **(Tick all that apply)**

- 1  Diet and lifestyle  
2  Physical activity and exercise  
3  Financial help or benefits  
4  Free prescriptions  
5  Returning to or staying in work  
6  Information / advice for family / friends /  
carer  
7  The physical aspects of living with and  
after cancer (e.g. side effects or signs  
of recurrence)  
8  The psychological or emotional aspects  
of living with and after cancer  
9  I have all the information and advice I  
need

## ABOUT YOU

**If you are helping someone to complete this questionnaire, please make sure this information is the patient's and not your own.**

**6' .** What year were you born?

(Please write in) e.g. 

|   |   |   |   |
|---|---|---|---|
| 1 | 9 | 4 | 4 |
|---|---|---|---|

|   |   |   |   |
|---|---|---|---|
| Y | Y | Y | Y |
|---|---|---|---|

**64.** Are you male or female?

- 1  Male  
2  Female

**65.** Which of the following best describes your sexual orientation?

- 1  Heterosexual / straight (opposite sex)  
2  Bisexual (both sexes)  
3  Gay or lesbian (same sex)  
4  Other  
5  Prefer not to answer

**66.** Which statement best describes your living arrangements?

- 1  I live with partner/spouse/family/friends  
2  I live alone  
3  I live in a nursing home, hospital or other long term care home  
4  Other

**67.** Do you have a long standing health condition? *Please include anything other than your cancer that has troubled you over a period of time or that could affect you over a period of time.*

- 1  Yes  
2  No  
3  Don't know / can't say

**68.** Which, if any, of the following conditions do you have? **(Tick all that apply)**

- 1  Alzheimer's disease or dementia  
2  Angina  
3  Arthritis  
4  Asthma or other chronic chest problem  
5  Blindness or visual impairment  
6  Deafness or hearing impairment  
7  Diabetes  
8  Epilepsy  
9  Heart condition  
10  High blood pressure  
11  Kidney disease  
12  Learning difficulty  
13  Liver disease  
14  Long term back problems  
15  Long-standing mental health problem  
16  Long-standing neurological problem  
17  Another long-standing condition  
18  I do not have any of these conditions

69. What was your employment status *before you were diagnosed with cancer*?

- 1  
2  
3  
4  Full time employment  
5  
6  Part time employment  
7  
8  Homemaker  
9  
10  Student (in education)  
11  
12  Retired  
13  
14  Unemployed – and seeking work  
15  
16  Unemployed – unable to work for health  
17 reasons  
18  
19  Other  
20  
21

70. What is your employment status currently? *If on maternity or sick leave answer in relation to your usual employment status.*

- 22  
23  
24  
25  
26  
27  
28  Full time employment  
29  
30  Part time employment  
31  
32  Homemaker  
33  
34  Student (in education)  
35  
36  Retired  
37  
38  Unemployed – and seeking work  
39  
40  Unemployed – unable to work for health  
41 reasons  
42  
43  Other  
44  
45

71. If you are currently employed at the moment, are you:

- 46  
47  
48  
49  Not working at all  
50  
51  Working less hours than usual  
52  
53  Working your usual hours  
54  
55  Working more hours than usual  
56  
57  This question does not apply to me  
58  
59  
60

72. To which of these ethnic groups would you say you belong? (Tick **ONE** only)

a. **WHITE**

- 1  British  
2  Irish  
3  Any other White background  
(Please write in box)

b. **MIXED**

- 4  White and Black Caribbean  
5  White and Black African  
6  White and Asian  
7  Any other Mixed background  
(Please write in box)

c. **ASIAN OR ASIAN BRITISH**

- 8  Indian  
9  Pakistani  
10  Bangladeshi  
11  Any other Asian background  
(Please write in box)

d. **BLACK OR BLACK BRITISH**

- 12  Caribbean  
13  African  
14  Any other Black background  
(Please write in box)

e. **CHINESE OR OTHER ETHNIC GROUP**

- 15  Chinese  
16  Any other ethnic group  
(Please write in box)

## COMMENTS

If you have anything else you would like to tell us about living with and beyond cancer, please do so here:

1  
2  
3  
4  
5  
6  
7  
8  
9  
10  
11  
12  
13  
14  
15  
16  
17  
18  
19  
20  
21  
22  
23  
24  
25  
26  
27  
28  
29  
30  
31  
32  
33  
34  
35  
36  
37  
38  
39  
40  
41  
42  
43  
44  
45  
46  
47  
48  
49  
50  
51  
52  
53  
54  
55



56 Questions 5-9 are EQ -5D-5L. UK (English) v.2 © 2009 EuroQol Group. EQ-5D™ is a trade mark of the  
57 EuroQol Group.

58 Questions 10 – 18 and 20 - 22 are taken from FACIT copyright 1987, 1997 by David Cella, PhD  
59

60 Questions 26 – 46 are taken from the Social Difficulties Inventory. Originators of the Social Difficulties  
Inventory: Wright, E.P., Cull, A. and Selby, P.



## Living with and beyond Non Hodgkin's Lymphoma

This questionnaire is about your health and quality of life since being diagnosed with your cancer. Its purpose is to provide information which can help the NHS monitor and improve the quality of health services for future patients.

### Who should complete the questionnaire?

The questions should be answered by the person named in the letter enclosed with this questionnaire. If that person needs help to complete the questionnaire, the answers should be given from their point of view – not the point of view of the person who is helping.

### Completing the questionnaire

For each question please tick clearly inside the box that is closest to your views using a black or blue pen. Don't worry if you make a mistake; simply cross out the mistake and put a tick in the correct box. Please **do not** write your name or address anywhere on the questionnaire.

### IMPORTANT INFORMATION

To make sure the information we collect is useful, we need to collect some personal details from you and to access information held about you in other NHS databases. The purpose of collecting this information is to generate aggregated statistics about the quality of life for people who are living with and beyond cancer. These statistics will be used to compare the differences in quality of life for people treated for different types of cancer by different providers and to understand what may be causing these. The results will be used to measure and improve the quality of healthcare services.

**By completing this questionnaire you are giving your consent for the information provided to be used for the above purposes. Specifically, you are agreeing that:**

- Your personal details and relevant health information can be held and used by an organisation contracted to the Department of Health to analyse the data
- Other information about you held by the Patient Demographics Service, the Secondary Users Service, Cancer Registries and other NHS databases can be held and used by an organisation contracted to the Department of Health to analyse the data
- Your personal details can be used to send you related follow-up questionnaires in the future

Your personal information will be handled securely and anonymised after analysis and before any publication.

Your personal information will not be released by the Department of Health or third party organisations working on its behalf unless required by law or where there is a clear overriding public interest.

You can withdraw the information you give the NHS in this questionnaire upon request, up to the point at which data are analysed and personal details removed.

If you have any queries about the questionnaire,  
please call the FREEPHONE helpline number on **0800 783 1775**

**Taking part in this survey is voluntary**  
**Published reports will not contain any personal details**

## YOUR HEALTH TODAY

*The questions in this section are all about your health and how you feel on the day you complete this questionnaire.*

1. What treatments have you received for your Non Hodgkin's Lymphoma (NHL)? (Tick all that apply)

- 1  Radiotherapy
- 2  Chemotherapy
- 3  Surgery
- 4  Antibody therapy (including Rituximab)
- 5  Stem cell transplant

2. How long is it since you completed your **initial treatment** for NHL? *Treatment includes any chemotherapy, radiotherapy, or surgery for your NHL. When answering this question please do not include antibody (Rituximab) treatment which you may have been given as a maintenance treatment following chemotherapy.*

- 1  I am still having my initial treatment
- 2  It is less than 3 months since my initial treatment
- 3  It is between 3 and 12 months since my initial treatment
- 4  It is between 1 and 5 years since my initial treatment
- 5  It is more than 5 years since my initial treatment
- 6  Don't know / can't remember

3. How has your NHL responded to treatment?

- 1  My NHL has responded fully to treatment (I am in remission)
- 2  My NHL has been treated but is still present
- 3  My NHL has not been treated at all
- 4  My NHL has come back after it was originally treated
- 5  I am not certain what is happening with my NHL



# YOUR HEALTH TODAY

Under each heading, please tick the **ONE** box that best describes your health TODAY.

## 4. MOBILITY

- I have no problems in walking about <sub>1</sub>
- I have slight problems in walking about <sub>2</sub>
- I have moderate problems in walking about <sub>3</sub>
- I have severe problems in walking about <sub>4</sub>
- I am unable to walk about <sub>5</sub>

## 5. SELF CARE

- I have no problems washing or dressing myself <sub>1</sub>
- I have slight problems washing or dressing myself <sub>2</sub>
- I have moderate problems washing or dressing myself <sub>3</sub>
- I have severe problems washing or dressing myself <sub>4</sub>
- I am unable to wash or dress myself <sub>5</sub>

## 6. USUAL ACTIVITIES (*work, study, housework, family or leisure activities*)

- I have no problems doing my usual activities <sub>1</sub>
- I have slight problems doing my usual activities <sub>2</sub>
- I have moderate problems doing my usual activities <sub>3</sub>
- I have severe problems doing my usual activities <sub>4</sub>
- I am unable to do my usual activities <sub>5</sub>

## 7. PAIN / DISCOMFORT

- I have no pain or discomfort <sub>1</sub>
- I have slight pain or discomfort <sub>2</sub>
- I have moderate pain or discomfort <sub>3</sub>
- I have severe pain or discomfort <sub>4</sub>
- I have extreme pain or discomfort <sub>5</sub>

## 8. ANXIETY / DEPRESSION

- I am not anxious or depressed <sub>1</sub>
- I am slightly anxious or depressed <sub>2</sub>
- I am moderately anxious or depressed <sub>3</sub>
- I am severely anxious or depressed <sub>4</sub>
- I am extremely anxious or depressed <sub>5</sub>



# YOUR HEALTH AND WELL BEING IN THE LAST 7 DAYS

*The questions in this section are about your health and how you have felt in the past 7 days.*

Please mark one box per line to give your response.

| <i>During the past 7 days:</i> |                                                                                                                                                                                                                                                                                                                                                           | Not at all                 | A little bit               | Some-what                  | Quite a bit                | Very much                  |                            |                            |
|--------------------------------|-----------------------------------------------------------------------------------------------------------------------------------------------------------------------------------------------------------------------------------------------------------------------------------------------------------------------------------------------------------|----------------------------|----------------------------|----------------------------|----------------------------|----------------------------|----------------------------|----------------------------|
| 9.                             | I have certain parts of my body where I experience pain                                                                                                                                                                                                                                                                                                   | 1 <input type="checkbox"/> | 2 <input type="checkbox"/> | 3 <input type="checkbox"/> | 4 <input type="checkbox"/> | 5 <input type="checkbox"/> |                            |                            |
| 10.                            | I am bothered by lumps or swelling in certain parts of my body (e.g. neck, armpits, or groin)                                                                                                                                                                                                                                                             | 1 <input type="checkbox"/> | 2 <input type="checkbox"/> | 3 <input type="checkbox"/> | 4 <input type="checkbox"/> | 5 <input type="checkbox"/> |                            |                            |
| 11.                            | I am bothered by fevers (episodes of high body temperature)                                                                                                                                                                                                                                                                                               | 1 <input type="checkbox"/> | 2 <input type="checkbox"/> | 3 <input type="checkbox"/> | 4 <input type="checkbox"/> | 5 <input type="checkbox"/> |                            |                            |
| 12.                            | I have night sweats                                                                                                                                                                                                                                                                                                                                       | 1 <input type="checkbox"/> | 2 <input type="checkbox"/> | 3 <input type="checkbox"/> | 4 <input type="checkbox"/> | 5 <input type="checkbox"/> |                            |                            |
| 13.                            | I am bothered by itching                                                                                                                                                                                                                                                                                                                                  | 1 <input type="checkbox"/> | 2 <input type="checkbox"/> | 3 <input type="checkbox"/> | 4 <input type="checkbox"/> | 5 <input type="checkbox"/> |                            |                            |
| 14.                            | I have trouble sleeping at night                                                                                                                                                                                                                                                                                                                          | 1 <input type="checkbox"/> | 2 <input type="checkbox"/> | 3 <input type="checkbox"/> | 4 <input type="checkbox"/> | 5 <input type="checkbox"/> |                            |                            |
| 15.                            | I get tired easily                                                                                                                                                                                                                                                                                                                                        | 1 <input type="checkbox"/> | 2 <input type="checkbox"/> | 3 <input type="checkbox"/> | 4 <input type="checkbox"/> | 5 <input type="checkbox"/> |                            |                            |
| 16.                            | I am losing weight                                                                                                                                                                                                                                                                                                                                        | 1 <input type="checkbox"/> | 2 <input type="checkbox"/> | 3 <input type="checkbox"/> | 4 <input type="checkbox"/> | 5 <input type="checkbox"/> |                            |                            |
| 17.                            | I have a loss of appetite                                                                                                                                                                                                                                                                                                                                 | 1 <input type="checkbox"/> | 2 <input type="checkbox"/> | 3 <input type="checkbox"/> | 4 <input type="checkbox"/> | 5 <input type="checkbox"/> |                            |                            |
| 18.                            | I have trouble concentrating                                                                                                                                                                                                                                                                                                                              | 1 <input type="checkbox"/> | 2 <input type="checkbox"/> | 3 <input type="checkbox"/> | 4 <input type="checkbox"/> | 5 <input type="checkbox"/> |                            |                            |
| 19.                            | I worry about getting infections                                                                                                                                                                                                                                                                                                                          | 1 <input type="checkbox"/> | 2 <input type="checkbox"/> | 3 <input type="checkbox"/> | 4 <input type="checkbox"/> | 5 <input type="checkbox"/> |                            |                            |
| 20.                            | I worry that I might get new symptoms of my illness                                                                                                                                                                                                                                                                                                       | 1 <input type="checkbox"/> | 2 <input type="checkbox"/> | 3 <input type="checkbox"/> | 4 <input type="checkbox"/> | 5 <input type="checkbox"/> |                            |                            |
| 21.                            | I feel isolated from others because of my illness or treatment                                                                                                                                                                                                                                                                                            | 1 <input type="checkbox"/> | 2 <input type="checkbox"/> | 3 <input type="checkbox"/> | 4 <input type="checkbox"/> | 5 <input type="checkbox"/> |                            |                            |
| 22.                            | I have emotional ups and downs                                                                                                                                                                                                                                                                                                                            | 1 <input type="checkbox"/> | 2 <input type="checkbox"/> | 3 <input type="checkbox"/> | 4 <input type="checkbox"/> | 5 <input type="checkbox"/> |                            |                            |
| 23.                            | Because of my illness, I have difficulty planning for the future                                                                                                                                                                                                                                                                                          | 1 <input type="checkbox"/> | 2 <input type="checkbox"/> | 3 <input type="checkbox"/> | 4 <input type="checkbox"/> | 5 <input type="checkbox"/> |                            |                            |
| 24.                            | In the <b>past week</b> , on how many days have you done a total of 30 minutes or more of physical activity, which was enough to raise your heart rate? <i>This may include sport, exercise and brisk walking or cycling for recreation or to get to and from places, but should not include housework or physical activity that is part of your job.</i> |                            |                            |                            |                            |                            |                            |                            |
|                                | <b>None</b>                                                                                                                                                                                                                                                                                                                                               | <b>1 day</b>               | <b>2 days</b>              | <b>3 days</b>              | <b>4 days</b>              | <b>5 days</b>              | <b>6 days</b>              | <b>7 days</b>              |
|                                | 1 <input type="checkbox"/>                                                                                                                                                                                                                                                                                                                                | 2 <input type="checkbox"/> | 3 <input type="checkbox"/> | 4 <input type="checkbox"/> | 5 <input type="checkbox"/> | 6 <input type="checkbox"/> | 7 <input type="checkbox"/> | 8 <input type="checkbox"/> |

## YOUR HEALTH AND WELL BEING IN THE LAST MONTH

**The questions in this section are about your health and how you have felt during the past month.**

Sometimes people who have, or have had cancer find that they have a number of everyday difficulties to cope with following their diagnosis. These might be to do with things like their family life, social activities, finances and work.

**Please tick the response that best describes your answer.**

| <i>During the past month:</i>                                                                                                                 | No<br>difficulty           | A little                   | Quite<br>a bit             | Very<br>much               | Does<br>not<br>apply       |
|-----------------------------------------------------------------------------------------------------------------------------------------------|----------------------------|----------------------------|----------------------------|----------------------------|----------------------------|
| 25. Have you had any difficulty in maintaining your independence?                                                                             | 1 <input type="checkbox"/> | 2 <input type="checkbox"/> | 3 <input type="checkbox"/> | 4 <input type="checkbox"/> | 5 <input type="checkbox"/> |
| 26. Have you had any difficulty in carrying out your domestic chores? (e.g. cleaning, gardening, cooking, shopping)                           | 1 <input type="checkbox"/> | 2 <input type="checkbox"/> | 3 <input type="checkbox"/> | 4 <input type="checkbox"/> | 5 <input type="checkbox"/> |
| 27. Have you had any difficulty with managing your own personal care? (e.g. bathing, dressing, washing)                                       | 1 <input type="checkbox"/> | 2 <input type="checkbox"/> | 3 <input type="checkbox"/> | 4 <input type="checkbox"/> | 5 <input type="checkbox"/> |
| 28. Have you had any difficulty with looking after those who depend on you? (e.g. children, dependent adults, pets)                           | 1 <input type="checkbox"/> | 2 <input type="checkbox"/> | 3 <input type="checkbox"/> | 4 <input type="checkbox"/> | 5 <input type="checkbox"/> |
| 29. Have any of those close to you (e.g. partner, children, parents) had any difficulty with the support available to them?                   | 1 <input type="checkbox"/> | 2 <input type="checkbox"/> | 3 <input type="checkbox"/> | 4 <input type="checkbox"/> | 5 <input type="checkbox"/> |
| 30. Have you had any difficulty with benefits? (e.g. statutory sick pay, attendance allowance, disability living allowance)                   | 1 <input type="checkbox"/> | 2 <input type="checkbox"/> | 3 <input type="checkbox"/> | 4 <input type="checkbox"/> | 5 <input type="checkbox"/> |
| 31. Have you had any financial difficulties?                                                                                                  | 1 <input type="checkbox"/> | 2 <input type="checkbox"/> | 3 <input type="checkbox"/> | 4 <input type="checkbox"/> | 5 <input type="checkbox"/> |
| 32. Have you had any difficulty with financial services? (e.g. loans, mortgages, pensions, insurance)                                         | 1 <input type="checkbox"/> | 2 <input type="checkbox"/> | 3 <input type="checkbox"/> | 4 <input type="checkbox"/> | 5 <input type="checkbox"/> |
| 33. Have you had any difficulty concerning your work? (or education if you are a student)                                                     | 1 <input type="checkbox"/> | 2 <input type="checkbox"/> | 3 <input type="checkbox"/> | 4 <input type="checkbox"/> | 5 <input type="checkbox"/> |
| 34. Have you had any difficulty with planning for your own or your family's future? (e.g. care of dependents, legal issues, business affairs) | 1 <input type="checkbox"/> | 2 <input type="checkbox"/> | 3 <input type="checkbox"/> | 4 <input type="checkbox"/> | 5 <input type="checkbox"/> |

# YOUR HEALTH AND WELL BEING IN THE LAST MONTH

1  
2  
3  
4  
5  
6  
7  
8  
9  
10  
11  
12  
13  
14  
15  
16  
17  
18  
19  
20  
21  
22  
23  
24  
25  
26  
27  
28  
29  
30  
31  
32  
33  
34  
35  
36  
37  
38  
39  
40  
41  
42  
43  
44  
45  
46  
47  
48  
49  
50  
51  
52  
53  
54  
55  
56  
57  
58  
59  
60

*During the past month:*

No difficulty      A little      Quite a bit      Very much      Does not apply

- 35. Have you had any difficulty with communicating with those closest to you? (e.g. partner, children, parents)      1       2       3       4       5
- 36. Have you had any difficulty with communicating with others? (e.g. friends, neighbours, colleagues, dates)      1       2       3       4       5
- 37. Have you had any difficulty concerning sexual matters?      1       2       3       4       5
- 38. Have you had any difficulty concerning plans to have a family?      1       2       3       4       5
- 39. Have you had any difficulty concerning your appearance or body image?      1       2       3       4       5
- 40. Have you felt isolated?      1       2       3       4       5
- 41. Have you had any difficulty with getting around? (e.g. transport, car parking, your mobility)      1       2       3       4       5
- 42. Have you had any difficulty with where you live? (e.g. space, access, damp, heating, neighbours, security)      1       2       3       4       5
- 43. Have you had any difficulty in carrying out your recreational activities? (e.g. hobbies, pastimes, social pursuits)      1       2       3       4       5
- 44. Have you had any difficulty with your plans to travel or take a holiday?      1       2       3       4       5
- 45. Have you had any difficulty with any other area of your everyday life?      1       2       3       4       5

## YOUR HEALTH AND WELL BEING IN THE LAST MONTH

*The questions in this section are about your health and how you have felt during the past month.*

Please tick the response that best describes your answer.

|                                              | Strongly agree             | Agree                      | Neither agree nor disagree | Disagree                   | Strongly disagree          | Does not apply to me       |
|----------------------------------------------|----------------------------|----------------------------|----------------------------|----------------------------|----------------------------|----------------------------|
| 46. I have fears about my cancer spreading   | 1 <input type="checkbox"/> | 2 <input type="checkbox"/> | 3 <input type="checkbox"/> | 4 <input type="checkbox"/> | 5 <input type="checkbox"/> | 6 <input type="checkbox"/> |
| 47. I have fears about my cancer coming back | 1 <input type="checkbox"/> | 2 <input type="checkbox"/> | 3 <input type="checkbox"/> | 4 <input type="checkbox"/> | 5 <input type="checkbox"/> | 6 <input type="checkbox"/> |
| 48. I have fears about death and dying       | 1 <input type="checkbox"/> | 2 <input type="checkbox"/> | 3 <input type="checkbox"/> | 4 <input type="checkbox"/> | 5 <input type="checkbox"/> |                            |
| 49. I experience memory loss                 | 1 <input type="checkbox"/> | 2 <input type="checkbox"/> | 3 <input type="checkbox"/> | 4 <input type="checkbox"/> | 5 <input type="checkbox"/> |                            |
| 50. I have trouble sleeping                  | 1 <input type="checkbox"/> | 2 <input type="checkbox"/> | 3 <input type="checkbox"/> | 4 <input type="checkbox"/> | 5 <input type="checkbox"/> |                            |
| 51. I have trouble concentrating             | 1 <input type="checkbox"/> | 2 <input type="checkbox"/> | 3 <input type="checkbox"/> | 4 <input type="checkbox"/> | 5 <input type="checkbox"/> |                            |
| 52. I always feel tired                      | 1 <input type="checkbox"/> | 2 <input type="checkbox"/> | 3 <input type="checkbox"/> | 4 <input type="checkbox"/> | 5 <input type="checkbox"/> |                            |
| 53. I experience mood swings                 | 1 <input type="checkbox"/> | 2 <input type="checkbox"/> | 3 <input type="checkbox"/> | 4 <input type="checkbox"/> | 5 <input type="checkbox"/> |                            |
| 54. I am often irritable                     | 1 <input type="checkbox"/> | 2 <input type="checkbox"/> | 3 <input type="checkbox"/> | 4 <input type="checkbox"/> | 5 <input type="checkbox"/> |                            |

## OVERALL SUPPORT AND CARE

1  
2  
3 **55.** Do you have an up-to-date written care  
4 plan? *A care plan is a document that sets*  
5 *out your needs and goals for caring for*  
6 *your cancer.*  
7

- 8 1  Yes, definitely  
9  
10 2  Yes, I think so  
11  
12 3  No  
13  
14 4  I do not need a care plan  
15  
16 5  Don't know  
17

18  
19 **56.** Do you have a named nurse who you can  
20 contact if you have a worry about your  
21 cancer care? *A named nurse is sometimes*  
22 *known as a Clinical Nurse Specialist or*  
23 *Specialist Cancer Nurse.*  
24

- 25  
26 1  Yes  
27  
28 2  No  
29  
30 3  Don't know  
31

32  
33 **57.** Do you know who to contact if you have a  
34 concern about any aspect of living with or  
35 after cancer?  
36

- 37 1  Yes, definitely  
38  
39 2  Yes, I think so  
40  
41 3  No  
42

43  
44 **58.** Do you think that hospital staff did  
45 everything they could to support you  
46 following your cancer treatment?  
47

- 48  
49 1  Yes, all of the time  
50  
51 2  Only some of the time  
52  
53 3  Never  
54  
55 4  I did not need any support  
56  
57  
58  
59  
60

**59.** Do you think that GPs and nurses at your  
general practice do everything they can to  
support you following your cancer  
treatment?

- 1  Yes, all of the time  
2  Only some of the time  
3  Never  
4  My general practice is not involved  
5  I do not need any support

**60.** Following your initial cancer treatment  
have you been given enough care and help  
from health and social services (for  
example, district nurses, home helps or  
occupational therapists)?

- 1  Yes, definitely  
2  Yes, to some extent  
3  No  
4  I did not need help from health or social  
services  
5  Don't know / can't remember

**61.** Would it have been helpful to have had  
more advice or information on any of the  
following issues: **(Tick all that apply)**

- 1  Diet and lifestyle  
2  Physical activity and exercise  
3  Financial help or benefits  
4  Free prescriptions  
5  Returning to or staying in work  
6  Information / advice for family / friends /  
carer  
7  The physical aspects of living with and  
after cancer (e.g. side effects or signs  
of recurrence)  
8  The psychological or emotional aspects  
of living with and after cancer  
9  I have all the information and advice I  
need

## ABOUT YOU

**If you are helping someone to complete this questionnaire, please make sure this information is the patient's and not your own.**

**62.** What year were you born?

(Please write in) e.g. 

|   |   |   |   |
|---|---|---|---|
| 1 | 9 | 4 | 4 |
|---|---|---|---|

|   |   |   |   |
|---|---|---|---|
| Y | Y | Y | Y |
|---|---|---|---|

**63.** Are you male or female?

- 1  Male  
2  Female

**64.** Which of the following best describes your sexual orientation?

- 1  Heterosexual / straight (opposite sex)  
2  Bisexual (both sexes)  
3  Gay or lesbian (same sex)  
4  Other  
5  Prefer not to answer

**65.** Which statement best describes your living arrangements?

- 1  I live with partner / spouse / family / friends  
2  I live alone  
3  I live in a nursing home, hospital or other long term care home  
4  Other

**66.** Do you have a long standing health condition? Please include anything **other than your cancer** that has troubled you over a period of time or that could affect you over a period of time.

- 1  Yes  
2  No  
3  Don't know / can't say

**67.** Which, if any, of the following conditions do you have? (Tick all that apply)

- 1  Alzheimer's disease or dementia  
2  Angina  
3  Arthritis  
4  Asthma or other chronic chest problem  
5  Blindness or visual impairment  
6  Deafness or hearing impairment  
7  Diabetes  
8  Epilepsy  
9  Heart condition  
10  High blood pressure  
11  Kidney disease  
12  Learning difficulty  
13  Liver disease  
14  Long term back problems  
15  Long-standing mental health problem  
16  Long-standing neurological problem  
17  Another long-standing condition  
18  I do not have any of these conditions

1  
2  
3  
4  
5  
6  
7  
8  
9  
10  
11  
12  
13  
14  
15  
16  
17  
18  
19  
20  
21  
22  
23  
24  
25  
26  
27  
28  
29  
30  
31  
32  
33  
34  
35  
36  
37  
38  
39  
40  
41  
42  
43  
44  
45  
46  
47  
48  
49  
50  
51  
52  
53  
54  
55  
56  
57  
58  
59  
60

**68.** What was your employment status *before you were diagnosed with cancer?*

- 1  Full time employment
- 2  Part time employment
- 3  Homemaker
- 4  Student (in education)
- 5  Retired
- 6  Unemployed – and seeking work
- 7  Unemployed – unable to work for health reasons
- 8  Other

**69.** What is your employment status currently? *If on maternity or sick leave answer in relation to your usual employment status.*

- 1  Full time employment
- 2  Part time employment
- 3  Homemaker
- 4  Student (in education)
- 5  Retired
- 6  Unemployed – and seeking work
- 7  Unemployed – unable to work for health reasons
- 8  Other

**70.** If you are currently employed at the moment, are you:

- 1  Not working at all
- 2  Working less hours than usual
- 3  Working your usual hours
- 4  Working more hours than usual
- 5  This question does not apply to me

**71.** To which of these ethnic groups would you say you belong? (Tick **ONE** only)

**a. WHITE**

- 1  British
- 2  Irish
- 3  Any other White background (Please write in box)

**b. MIXED**

- 4  White and Black Caribbean
- 5  White and Black African
- 6  White and Asian
- 7  Any other Mixed background (Please write in box)

**c. ASIAN OR ASIAN BRITISH**

- 8  Indian
- 9  Pakistani
- 10  Bangladeshi
- 11  Any other Asian background (Please write in box)

**d. BLACK OR BLACK BRITISH**

- 12  Caribbean
- 13  African
- 14  Any other Black background (Please write in box)

**e. CHINESE OR OTHER ETHNIC GROUP**

- 15  Chinese
- 16  Any other ethnic group (Please write in box)

## COMMENTS

**If you have anything else you would like to tell us about living with and beyond cancer, please do so here:**

For peer review only

Questions 4 - 8 are EQ-5D-5L. UK (English) v.2 © 2009 EuroQol Group. EQ-5D™ is a trade mark of the EuroQol Group.

Questions 9 – 23 are from FACIT. Copyright 1987, 1997 by David Cella, PhD

Questions 25 – 45 are from the Social Difficulties Inventory. Originators of the Social Difficulties Inventory: Wright, E.P., Cull, A. and Selby, P.



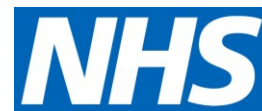

## Living with and beyond Prostate Cancer

This questionnaire is about your health and quality of life since being diagnosed with your cancer. Its purpose is to provide information which can help the NHS monitor and improve the quality of health services for future patients.

### Who should complete the questionnaire?

The questions should be answered by the person named in the letter enclosed with this questionnaire. If that person needs help to complete the questionnaire, the answers should be given from their point of view – not the point of view of the person who is helping.

### Completing the questionnaire

For each question please tick clearly inside the box that is closest to your views using a black or blue pen. Don't worry if you make a mistake; simply cross out the mistake and put a tick in the correct box. Please **do not** write your name or address anywhere on the questionnaire.

### IMPORTANT INFORMATION

To make sure the information we collect is useful, we need to collect some personal details from you and to access information held about you in other NHS databases. The purpose of collecting this information is to generate aggregated statistics about the quality of life for people who are living with and beyond cancer. These statistics will be used to compare the differences in quality of life for people treated for different types of cancer by different providers and to understand what may be causing these. The results will be used to measure and improve the quality of healthcare services.

**By completing this questionnaire you are giving your consent for the information provided to be used for the above purposes. Specifically, you are agreeing that:**

- Your personal details and relevant health information can be held and used by an organisation contracted to the Department of Health to analyse the data
- Other information about you held by the Patient Demographics Service, the Secondary Users Service, Cancer Registries and other NHS databases can be held and used by an organisation contracted to the Department of Health to analyse the data
- Your personal details can be used to send you related follow-up questionnaires in the future

Your personal information will be handled securely and anonymised after analysis and before any publication.

Your personal information will not be released by the Department of Health or third party organisations working on its behalf unless required by law or where there is a clear overriding public interest.

You can withdraw the information you give the NHS in this questionnaire upon request, up to the point at which data are analysed and personal details removed.

If you have any queries about the questionnaire,  
please call the FREEPHONE helpline number on **0800 783 1775**

**Taking part in this survey is voluntary**  
**Published reports will not contain any personal details**

## YOUR HEALTH TODAY

*The questions in this section are all about your health and how you feel on the day you complete this questionnaire.*

1. What treatments have you received for your prostate cancer? **(Tick all that apply)**

- 1  Radiotherapy (including brachytherapy) (with or without planned hormonal treatment)
- 2  Surgery
- 3  Hormone treatment
- 4  Chemotherapy (not including hormones)
- 5  HIFU
- 6  Cryotherapy
- 7  Active Surveillance (close monitoring but no current intervention)

2. How long is it since you completed your **initial treatment** for prostate cancer? *Treatment includes any chemotherapy, radiotherapy, or surgery for your prostate cancer. When answering this question please do not include hormone treatments.*

- 1  I am still having my initial treatment
- 2  It is less than 3 months since my initial treatment
- 3  It is between 3 and 12 months since my initial treatment
- 4  It is between 1 and 5 years since my initial treatment
- 5  It is more than 5 years since my initial treatment
- 6  Don't know / can't remember

3. How has your prostate cancer responded to treatment?

- 1  My prostate cancer has responded fully to treatment (I am in remission)
- 2  My prostate cancer has been treated but is still present
- 3  My prostate cancer has not been treated at all
- 4  My prostate cancer has come back after it was originally treated
- 5  I am not certain what is happening with my prostate cancer

# YOUR HEALTH TODAY

Under each heading, please tick the ONE box that best describes your health TODAY.

## 4. MOBILITY

- I have no problems in walking about <sub>1</sub>
- I have slight problems in walking about <sub>2</sub>
- I have moderate problems in walking about <sub>3</sub>
- I have severe problems in walking about <sub>4</sub>
- I am unable to walk about <sub>5</sub>

## 5. SELF CARE

- I have no problems washing or dressing myself <sub>1</sub>
- I have slight problems washing or dressing myself <sub>2</sub>
- I have moderate problems washing or dressing myself <sub>3</sub>
- I have severe problems washing or dressing myself <sub>4</sub>
- I am unable to wash or dress myself <sub>5</sub>

## 6. USUAL ACTIVITIES (*work, study, housework, family or leisure activities*)

- I have no problems doing my usual activities <sub>1</sub>
- I have slight problems doing my usual activities <sub>2</sub>
- I have moderate problems doing my usual activities <sub>3</sub>
- I have severe problems doing my usual activities <sub>4</sub>
- I am unable to do my usual activities <sub>5</sub>

## 7. PAIN / DISCOMFORT

- I have no pain or discomfort <sub>1</sub>
- I have slight pain or discomfort <sub>2</sub>
- I have moderate pain or discomfort <sub>3</sub>
- I have severe pain or discomfort <sub>4</sub>
- I have extreme pain or discomfort <sub>5</sub>

## 8. ANXIETY / DEPRESSION

- I am not anxious or depressed <sub>1</sub>
- I am slightly anxious or depressed <sub>2</sub>
- I am moderately anxious or depressed <sub>3</sub>
- I am severely anxious or depressed <sub>4</sub>
- I am extremely anxious or depressed <sub>5</sub>

For peer review only - <http://bmjopen.bmj.com/site/about/guidelines.xhtml>

## YOUR HEALTH AND WELLBEING IN THE LAST 7 DAYS

*The questions in this section are about your health and how you have felt in the past 7 days.*

Please mark one box per line to give your response.

| <i>During the past 7 days:</i>                                                                                                                                                                                                                                                                                                                                | Not at<br>all              | A little<br>bit            | Some-<br>what              | Quite<br>a bit             | Very<br>much               |                            |                            |                            |
|---------------------------------------------------------------------------------------------------------------------------------------------------------------------------------------------------------------------------------------------------------------------------------------------------------------------------------------------------------------|----------------------------|----------------------------|----------------------------|----------------------------|----------------------------|----------------------------|----------------------------|----------------------------|
| 9. I am losing weight                                                                                                                                                                                                                                                                                                                                         | 1 <input type="checkbox"/> | 2 <input type="checkbox"/> | 3 <input type="checkbox"/> | 4 <input type="checkbox"/> | 5 <input type="checkbox"/> |                            |                            |                            |
| 10. I have a good appetite                                                                                                                                                                                                                                                                                                                                    | 1 <input type="checkbox"/> | 2 <input type="checkbox"/> | 3 <input type="checkbox"/> | 4 <input type="checkbox"/> | 5 <input type="checkbox"/> |                            |                            |                            |
| 11. I have aches and pains that bother me                                                                                                                                                                                                                                                                                                                     | 1 <input type="checkbox"/> | 2 <input type="checkbox"/> | 3 <input type="checkbox"/> | 4 <input type="checkbox"/> | 5 <input type="checkbox"/> |                            |                            |                            |
| 12. I have certain parts of my body where I experience pain                                                                                                                                                                                                                                                                                                   | 1 <input type="checkbox"/> | 2 <input type="checkbox"/> | 3 <input type="checkbox"/> | 4 <input type="checkbox"/> | 5 <input type="checkbox"/> |                            |                            |                            |
| 13. My pain keeps me from doing things I want to do                                                                                                                                                                                                                                                                                                           | 1 <input type="checkbox"/> | 2 <input type="checkbox"/> | 3 <input type="checkbox"/> | 4 <input type="checkbox"/> | 5 <input type="checkbox"/> |                            |                            |                            |
| 14. I am satisfied with my present comfort level                                                                                                                                                                                                                                                                                                              | 1 <input type="checkbox"/> | 2 <input type="checkbox"/> | 3 <input type="checkbox"/> | 4 <input type="checkbox"/> | 5 <input type="checkbox"/> |                            |                            |                            |
| 15. I have trouble moving my bowels                                                                                                                                                                                                                                                                                                                           | 1 <input type="checkbox"/> | 2 <input type="checkbox"/> | 3 <input type="checkbox"/> | 4 <input type="checkbox"/> | 5 <input type="checkbox"/> |                            |                            |                            |
| 16. I have difficulty urinating                                                                                                                                                                                                                                                                                                                               | 1 <input type="checkbox"/> | 2 <input type="checkbox"/> | 3 <input type="checkbox"/> | 4 <input type="checkbox"/> | 5 <input type="checkbox"/> |                            |                            |                            |
| 17. I urinate more frequently than usual                                                                                                                                                                                                                                                                                                                      | 1 <input type="checkbox"/> | 2 <input type="checkbox"/> | 3 <input type="checkbox"/> | 4 <input type="checkbox"/> | 5 <input type="checkbox"/> |                            |                            |                            |
| 18. My problems with urinating limit my activities                                                                                                                                                                                                                                                                                                            | 1 <input type="checkbox"/> | 2 <input type="checkbox"/> | 3 <input type="checkbox"/> | 4 <input type="checkbox"/> | 5 <input type="checkbox"/> |                            |                            |                            |
| 19. I am able to have and maintain an erection                                                                                                                                                                                                                                                                                                                | 1 <input type="checkbox"/> | 2 <input type="checkbox"/> | 3 <input type="checkbox"/> | 4 <input type="checkbox"/> | 5 <input type="checkbox"/> |                            |                            |                            |
| 20. I leak urine                                                                                                                                                                                                                                                                                                                                              | 1 <input type="checkbox"/> | 2 <input type="checkbox"/> | 3 <input type="checkbox"/> | 4 <input type="checkbox"/> | 5 <input type="checkbox"/> |                            |                            |                            |
| 21. Do you have any difficulty in controlling your bowels (e.g. any accidents)?                                                                                                                                                                                                                                                                               | 1 <input type="checkbox"/> | No                         | 2 <input type="checkbox"/> | Yes                        |                            |                            |                            |                            |
|                                                                                                                                                                                                                                                                                                                                                               | <b>Monthly</b>             | <b>Weekly</b>              | <b>Daily</b>               | <b>Constantly</b>          | <b>It varies</b>           |                            |                            |                            |
| 22. If yes, how often do you have difficulties?                                                                                                                                                                                                                                                                                                               | 1 <input type="checkbox"/> | 2 <input type="checkbox"/> | 3 <input type="checkbox"/> | 4 <input type="checkbox"/> | 5 <input type="checkbox"/> |                            |                            |                            |
| 23. In the <b>past week</b> , on how many days have you done a total of 30 minutes or more of physical activity, which was enough to raise your heart rate? <i>This may include sport, exercise and brisk walking or cycling for recreation or to get to and from places, but should not include housework or physical activity that is part of your job.</i> |                            |                            |                            |                            |                            |                            |                            |                            |
|                                                                                                                                                                                                                                                                                                                                                               | <b>None</b>                | <b>1 day</b>               | <b>2 days</b>              | <b>3 days</b>              | <b>4 days</b>              | <b>5 days</b>              | <b>6 days</b>              | <b>7 days</b>              |
|                                                                                                                                                                                                                                                                                                                                                               | 1 <input type="checkbox"/> | 2 <input type="checkbox"/> | 3 <input type="checkbox"/> | 4 <input type="checkbox"/> | 5 <input type="checkbox"/> | 6 <input type="checkbox"/> | 7 <input type="checkbox"/> | 8 <input type="checkbox"/> |

# YOUR HEALTH AND WELL BEING IN THE LAST MONTH

**The questions in this section are about your health and how you have felt during the past month.**

Sometimes people who have, or have had cancer find that they have a number of everyday difficulties to cope with following their diagnosis. These might be to do with things like their family life, social activities, finances and work.

**Please tick the response that best describes your answer.**

| <i>During the past month:</i>                                                                                                                 | No difficulty              | A little                   | Quite a bit                | Very much                  | Does not apply             |
|-----------------------------------------------------------------------------------------------------------------------------------------------|----------------------------|----------------------------|----------------------------|----------------------------|----------------------------|
| 24. Have you had any difficulty in maintaining your independence?                                                                             | 1 <input type="checkbox"/> | 2 <input type="checkbox"/> | 3 <input type="checkbox"/> | 4 <input type="checkbox"/> | 5 <input type="checkbox"/> |
| 25. Have you had any difficulty in carrying out your domestic chores? (e.g. cleaning, gardening, cooking, shopping)                           | 1 <input type="checkbox"/> | 2 <input type="checkbox"/> | 3 <input type="checkbox"/> | 4 <input type="checkbox"/> | 5 <input type="checkbox"/> |
| 26. Have you had any difficulty with managing your own personal care? (e.g. bathing, dressing, washing)                                       | 1 <input type="checkbox"/> | 2 <input type="checkbox"/> | 3 <input type="checkbox"/> | 4 <input type="checkbox"/> | 5 <input type="checkbox"/> |
| 27. Have you had any difficulty with looking after those who depend on you? (e.g. children, dependent adults, pets)                           | 1 <input type="checkbox"/> | 2 <input type="checkbox"/> | 3 <input type="checkbox"/> | 4 <input type="checkbox"/> | 5 <input type="checkbox"/> |
| 28. Have any of those close to you (e.g. partner, children, parents) had any difficulty with the support available to them?                   | 1 <input type="checkbox"/> | 2 <input type="checkbox"/> | 3 <input type="checkbox"/> | 4 <input type="checkbox"/> | 5 <input type="checkbox"/> |
| 29. Have you had any difficulty with benefits? (e.g. statutory sick pay, attendance allowance, disability living allowance)                   | 1 <input type="checkbox"/> | 2 <input type="checkbox"/> | 3 <input type="checkbox"/> | 4 <input type="checkbox"/> | 5 <input type="checkbox"/> |
| 30. Have you had any financial difficulties?                                                                                                  | 1 <input type="checkbox"/> | 2 <input type="checkbox"/> | 3 <input type="checkbox"/> | 4 <input type="checkbox"/> | 5 <input type="checkbox"/> |
| 31. Have you had any difficulty with financial services? (e.g. loans, mortgages, pensions, insurance)                                         | 1 <input type="checkbox"/> | 2 <input type="checkbox"/> | 3 <input type="checkbox"/> | 4 <input type="checkbox"/> | 5 <input type="checkbox"/> |
| 32. Have you had any difficulty concerning your work? (or education if you are a student)                                                     | 1 <input type="checkbox"/> | 2 <input type="checkbox"/> | 3 <input type="checkbox"/> | 4 <input type="checkbox"/> | 5 <input type="checkbox"/> |
| 33. Have you had any difficulty with planning for your own or your family's future? (e.g. care of dependents, legal issues, business affairs) | 1 <input type="checkbox"/> | 2 <input type="checkbox"/> | 3 <input type="checkbox"/> | 4 <input type="checkbox"/> | 5 <input type="checkbox"/> |

# YOUR HEALTH AND WELL BEING IN THE LAST MONTH

| <i>During the past month:</i> |                                                                                                                     | No difficulty              | A little                   | Quite a bit                | Very much                  | Does not apply             |
|-------------------------------|---------------------------------------------------------------------------------------------------------------------|----------------------------|----------------------------|----------------------------|----------------------------|----------------------------|
| 34.                           | Have you had any difficulty with communicating with those closest to you? (e.g. partner, children, parents)         | 1 <input type="checkbox"/> | 2 <input type="checkbox"/> | 3 <input type="checkbox"/> | 4 <input type="checkbox"/> | 5 <input type="checkbox"/> |
| 35.                           | Have you had any difficulty with communicating with others? (e.g. friends, neighbours, colleagues, dates)           | 1 <input type="checkbox"/> | 2 <input type="checkbox"/> | 3 <input type="checkbox"/> | 4 <input type="checkbox"/> | 5 <input type="checkbox"/> |
| 36.                           | Have you had any difficulty concerning sexual matters?                                                              | 1 <input type="checkbox"/> | 2 <input type="checkbox"/> | 3 <input type="checkbox"/> | 4 <input type="checkbox"/> | 5 <input type="checkbox"/> |
| 37.                           | Have you had any difficulty concerning plans to have a family?                                                      | 1 <input type="checkbox"/> | 2 <input type="checkbox"/> | 3 <input type="checkbox"/> | 4 <input type="checkbox"/> | 5 <input type="checkbox"/> |
| 38.                           | Have you had any difficulty concerning your appearance or body image?                                               | 1 <input type="checkbox"/> | 2 <input type="checkbox"/> | 3 <input type="checkbox"/> | 4 <input type="checkbox"/> | 5 <input type="checkbox"/> |
| 39.                           | Have you felt isolated?                                                                                             | 1 <input type="checkbox"/> | 2 <input type="checkbox"/> | 3 <input type="checkbox"/> | 4 <input type="checkbox"/> | 5 <input type="checkbox"/> |
| 40.                           | Have you had any difficulty with getting around? (e.g. transport, car parking, your mobility)                       | 1 <input type="checkbox"/> | 2 <input type="checkbox"/> | 3 <input type="checkbox"/> | 4 <input type="checkbox"/> | 5 <input type="checkbox"/> |
| 41.                           | Have you had any difficulty with where you live? (e.g. space, access, damp, heating, neighbours, security)          | 1 <input type="checkbox"/> | 2 <input type="checkbox"/> | 3 <input type="checkbox"/> | 4 <input type="checkbox"/> | 5 <input type="checkbox"/> |
| 42.                           | Have you had any difficulty in carrying out your recreational activities? (e.g. hobbies, pastimes, social pursuits) | 1 <input type="checkbox"/> | 2 <input type="checkbox"/> | 3 <input type="checkbox"/> | 4 <input type="checkbox"/> | 5 <input type="checkbox"/> |
| 43.                           | Have you had any difficulty with your plans to travel or take a holiday?                                            | 1 <input type="checkbox"/> | 2 <input type="checkbox"/> | 3 <input type="checkbox"/> | 4 <input type="checkbox"/> | 5 <input type="checkbox"/> |
| 44.                           | Have you had any difficulty with any other area of your everyday life?                                              | 1 <input type="checkbox"/> | 2 <input type="checkbox"/> | 3 <input type="checkbox"/> | 4 <input type="checkbox"/> | 5 <input type="checkbox"/> |

# YOUR HEALTH AND WELL BEING IN THE LAST MONTH

*The questions in this section are about your health and how you have felt during the past month.*

Please tick the response that best describes your answer.

|                                              | Strongly agree             | Agree                      | Neither agree nor disagree | Disagree                   | Strongly disagree          | Does not apply to me       |
|----------------------------------------------|----------------------------|----------------------------|----------------------------|----------------------------|----------------------------|----------------------------|
| 45. I have fears about my cancer spreading   | 1 <input type="checkbox"/> | 2 <input type="checkbox"/> | 3 <input type="checkbox"/> | 5 <input type="checkbox"/> | 5 <input type="checkbox"/> | 6 <input type="checkbox"/> |
| 46. I have fears about my cancer coming back | 1 <input type="checkbox"/> | 2 <input type="checkbox"/> | 3 <input type="checkbox"/> | 5 <input type="checkbox"/> | 5 <input type="checkbox"/> | 6 <input type="checkbox"/> |
| 47. I have fears about death and dying       | 1 <input type="checkbox"/> | 2 <input type="checkbox"/> | 3 <input type="checkbox"/> | 5 <input type="checkbox"/> | 5 <input type="checkbox"/> |                            |
| 48. I experience memory loss                 | 1 <input type="checkbox"/> | 2 <input type="checkbox"/> | 3 <input type="checkbox"/> | 5 <input type="checkbox"/> | 5 <input type="checkbox"/> |                            |
| 49. I have trouble sleeping                  | 1 <input type="checkbox"/> | 2 <input type="checkbox"/> | 3 <input type="checkbox"/> | 5 <input type="checkbox"/> | 5 <input type="checkbox"/> |                            |
| 50. I have trouble concentrating             | 1 <input type="checkbox"/> | 2 <input type="checkbox"/> | 3 <input type="checkbox"/> | 5 <input type="checkbox"/> | 5 <input type="checkbox"/> |                            |
| 51. I always feel tired                      | 1 <input type="checkbox"/> | 2 <input type="checkbox"/> | 3 <input type="checkbox"/> | 5 <input type="checkbox"/> | 5 <input type="checkbox"/> |                            |
| 52. I experience mood swings                 | 1 <input type="checkbox"/> | 2 <input type="checkbox"/> | 3 <input type="checkbox"/> | 5 <input type="checkbox"/> | 5 <input type="checkbox"/> |                            |
| 53. I am often irritable                     | 1 <input type="checkbox"/> | 2 <input type="checkbox"/> | 3 <input type="checkbox"/> | 5 <input type="checkbox"/> | 5 <input type="checkbox"/> |                            |



## OVERALL SUPPORT AND CARE

1  
2  
3 **54.** Do you have an up-to-date written care  
4 plan? *A care plan is a document that sets*  
5 *out your needs and goals for caring for*  
6 *your cancer.*  
7

- 8  Yes, definitely  
9  
10  Yes, I think so  
11  
12  No  
13  
14  I do not need a care plan  
15  
16  Don't know  
17

18  
19 **55.** Do you have a named nurse who you can  
20 contact if you have a worry about your  
21 cancer care? *A named nurse is sometimes*  
22 *known as a Clinical Nurse Specialist or*  
23 *Specialist Cancer Nurse.*  
24  
25

- 26  Yes  
27  
28  No  
29  
30  Don't know  
31  
32

33 **56.** Do you know who to contact if you have a  
34 concern about any aspect of living with or  
35 after cancer?  
36

- 37  Yes, definitely  
38  
39  Yes, I think so  
40  
41  No  
42  
43  
44

45 **57.** Do you think that hospital staff did  
46 everything they could to support you  
47 following your cancer treatment?  
48

- 49  Yes, all of the time  
50  
51  Only some of the time  
52  
53  Never  
54  
55  I did not need any support  
56  
57  
58  
59  
60

**58.** Do you think that GPs and nurses at your  
general practice do everything they can to  
support you following your cancer  
treatment?

- Yes, all of the time  
 Only some of the time  
 Never  
 My general practice is not involved  
 I do not need any support

**59.** Following your initial cancer treatment  
have you been given enough care and help  
from health and social services (for  
example, district nurses, home helps or  
occupational therapists)?

- Yes, definitely  
 Yes, to some extent  
 No  
 I did not need help from health or social  
services  
 Don't know / can't remember

**60.** Would it have been helpful to have had  
more advice or information on any of the  
following issues: **(Tick all that apply)**

- Diet and lifestyle  
 Physical activity and exercise  
 Financial help or benefits  
 Free prescriptions  
 Returning to or staying in work  
 Information / advice for family / friends /  
carer  
 The physical aspects of living with and  
after cancer (e.g. side effects or signs  
of recurrence)  
 The psychological or emotional aspects  
of living with and after cancer  
 I have all the information and advice I  
need



## ABOUT YOU

**If you are helping someone to complete this questionnaire, please make sure this information is the patient's and not your own.**

61. What year were you born?

(Please write in) e.g. 

|   |   |   |   |
|---|---|---|---|
| 1 | 9 | 4 | 4 |
|---|---|---|---|

|   |   |   |   |
|---|---|---|---|
| Y | Y | Y | Y |
|---|---|---|---|

62. Are you male or female?

- 1  Male
- 2  Female

63. Which of the following best describes your sexual orientation?

- 1  Heterosexual / straight (opposite sex)
- 2  Bisexual (both sexes)
- 3  Gay (same sex)
- 4  Other
- 5  Prefer not to answer

64. Which statement best describes your living arrangements?

- 1  I live with partner/spouse/family/friends
- 2  I live alone
- 3  I live in a nursing home, hospital or other long term care home
- 4  Other

65. Do you have a long standing health condition? *Please include anything other than your cancer that has troubled you over a period of time or that could affect you over a period of time.*

- 1  Yes
- 2  No
- 3  Don't know / can't say

66. Which, if any, of the following conditions do you have? (Tick all that apply)

- 1  Alzheimer's disease or dementia
- 2  Angina
- 3  Arthritis
- 4  Asthma or other chronic chest problem
- 5  Blindness or visual impairment
- 6  Deafness or hearing impairment
- 7  Diabetes
- 8  Epilepsy
- 9  Heart condition
- 10  High blood pressure
- 11  Kidney disease
- 12  Learning difficulty
- 13  Liver disease
- 14  Long term back problems
- 15  Long-standing mental health problem
- 16  Long-standing neurological problem
- 17  Another long-standing condition
- 18  I do not have any of these conditions

1  
2  
3  
4  
5  
6  
7  
8  
9  
10  
11  
12  
13  
14  
15  
16  
17  
18  
19  
20  
21  
22  
23  
24  
25  
26  
27  
28  
29  
30  
31  
32  
33  
34  
35  
36  
37  
38  
39  
40  
41  
42  
43  
44  
45  
46  
47  
48  
49  
50  
51  
52  
53  
54  
55  
56  
57  
58  
59  
60

67. What was your employment status **before you were diagnosed with cancer**?

- 1  Full time employment
- 2  Part time employment
- 3  Homemaker
- 4  Student (in education)
- 5  Retired
- 6  Unemployed – and seeking work
- 7  Unemployed – unable to work for health reasons
- 8  Other

68. What is your employment status currently? *If on maternity or sick leave answer in relation to your usual employment status.*

- 1  Full time employment
- 2  Part time employment
- 3  Homemaker
- 4  Student (in education)
- 5  Retired
- 6  Unemployed – and seeking work
- 7  Unemployed – unable to work for health reasons
- 8  Other

69. If you are currently employed at the moment, are you:

- 1  Not working at all
- 2  Working less hours than usual
- 3  Working your usual hours
- 4  Working more hours than usual
- 5  This question does not apply to me

70. To which of these ethnic groups would you say you belong? (Tick **ONE** only)

a. **WHITE**

- 1  British
- 2  Irish
- 3  Any other White background  
(Please write in box)

b. **MIXED**

- 4  White and Black Caribbean
- 5  White and Black African
- 6  White and Asian
- 7  Any other Mixed background  
(Please write in box)

c. **ASIAN OR ASIAN BRITISH**

- 8  Indian
- 9  Pakistani
- 10  Bangladeshi
- 11  Any other Asian background  
(Please write in box)

d. **BLACK OR BLACK BRITISH**

- 12  Caribbean
- 13  African
- 14  Any other Black background  
(Please write in box)

e. **CHINESE OR OTHER ETHNIC GROUP**

- 15  Chinese
- 16  Any other ethnic group  
(Please write in box)

## COMMENTS

If you have anything else you would like to tell us about living with and beyond cancer, please do so here:

1  
2  
3  
4  
5  
6  
7  
8  
9  
10  
11  
12  
13  
14  
15  
16  
17  
18  
19  
20  
21  
22  
23  
24  
25  
26  
27  
28  
29  
30  
31  
32  
33  
34  
35  
36  
37  
38  
39  
40  
41  
42  
43  
44  
45  
46  
47  
48  
49  
50  
51  
52  
53  
54  
55  
56  
57  
58  
59  
60



Questions 4-8 are EQ -5D-5L. UK (English) v.2 © 2009 EuroQol Group. EQ-5D™ is a trade mark of the EuroQol Group.

Questions 9 – 20 are taken from FACIT copyright 1987, 1997 by David Cella, PhD

Questions 24 – 44 are taken from the Social Difficulties Inventory. Originators of the Social Difficulties Inventory: Wright, E.P., Cull, A. and Selby, P.

For peer review only - <http://bmjopen.bmj.com/site/about/guidelines.xhtml>

NIGB Office,  
Floor 7,  
New Kings Beam House,  
22 Upper Ground,  
London,  
SE1 9BW.

Tel: (020) 7633 7052

Email: [eccapplications@nhs.net](mailto:eccapplications@nhs.net)

Simon Phillips  
Department of Health  
Room 403, Wellington House  
133 -155 Waterloo Road  
London  
SE1 8UG

18 May 2011

Dear Simon

### **8-05 (b)/2010 National Cancer Survivorship Initiative – patient reported outcome survey of cancer survivors**

Thank you for your application for support under section 251 of the NHS Act 2006 to process patient identifiable information without consent. This application was considered by the Ethics and Confidentiality Committee at its meeting on 01 December 2010.

#### **Context**

This application from the Department of Health (acting as sponsor) and Quality Health (the implementation provider) sought support to cover the pilot phase of a proposed national survey of cancer survivors, which is intended to last up until 30 June 2011.

**Update: due to slippages in timetables, it has been noted that following notification on 17 May 2011, that the survey will be completed by September 2011.**

The purpose of this activity was to aim to improve understanding of quality of life outcomes for cancer survivors and was intended to support the DH National Cancer Survivorship Initiative (NCSI). The activity would build upon the current national Cancer Patient Experience Survey Programme (CPESP) 2010 which focuses on the experience of care of cancer patients.

Section 251 support was sought to enable the legitimate transfer of patient data from the Cancer Registries to Quality Health, and for Quality Health to liaise with cancer centres so that patient questionnaires would be sent to patients under cover of appropriate cancer centre letter headed paper. Support was also required to enable a sample to be identified from the cancer registries. To carry out the activity, Quality Health would require access to name, address, sex, ethnic group, year of birth, NHS number, ICD10 code, speciality code, date of diagnosis, and Trust NACS code for most recent treatment spell.

#### **Outcome**

# NIGB

## Ethics and Confidentiality Committee

The letter dated 07 December 2010 set out the Committee's rationale and decision for its recommendation of provisional support, subject to a number of clarifications and conditions of approval. A response was subsequently provided providing copies of requested documentation and further explanation around the clarification areas.

In particular, Members debated the response to the information being sent on GP headed paper, and on balance and in this specific instance, agreed that this would not be feasible.

As all aspects have been satisfactorily addressed, this letter provides confirmation of your final approval, and our Register of approved applications will shortly be updated to include this application.

If you have any queries regarding the outcome of this letter please do not hesitate to contact the NIGB Office on 020 7633 7052. Email queries should be sent to [eccapplications@nhs.net](mailto:eccapplications@nhs.net).

Yours sincerely

Natasha Dunkley  
**NIGB Approvals Manager**

1  
2  
3  
4  
5  
6  
7  
8  
9  
10  
11  
12  
13  
14  
15  
16  
17  
18  
19  
20  
21  
22  
23  
24  
25  
26  
27  
28  
29  
30  
31  
32  
33  
34  
35  
36  
37  
38  
39  
40  
41  
42  
43  
44  
45  
46  
47  
48  
49  
50  
51  
52  
53  
54  
55  
56  
57  
58  
59  
60

### Ethics and Confidentiality Committee Standard conditions of approval

The support provided under section 251 is subject to the following standard conditions.

The applicant will ensure that:

1. The requested patient identifiable information is only used for the purpose(s) set out in the application.
2. Confidentiality is preserved and that there is no disclosure of information in aggregate or patient level form that may inferentially identify a person, nor will any attempt be made to identify individuals, households or organisations in the data.
3. Requirements of the Statistics and Registration Services Act 2007 are adhered to regarding publication when relevant.
4. All staff with access to patient identifiable information have contractual obligations of confidentiality, enforceable through disciplinary procedures.
5. All staff with access to patient identifiable information have received appropriate ongoing training to ensure they are aware of their responsibilities.
6. Activities are consistent with the Data Protection Act 1998.
7. Audit of data processing by a designated agent of the Secretary of State is facilitated and supported.
8. The wishes of people who have withheld or withdrawn their consent are respected.
9. The NIGB Office is notified of any significant changes which impact on the approval of the application.
10. An annual review to be provided no later than 12 months from date of your final approval letter

STROBE 2007 (v4) Statement—Checklist of items that should be included in reports of *cross-sectional studies*

| Section/Topic                | Item # | Recommendation                                                                                                                                                                       | Reported on page # |
|------------------------------|--------|--------------------------------------------------------------------------------------------------------------------------------------------------------------------------------------|--------------------|
| Title and abstract           | 1      | (a) Indicate the study's design with a commonly used term in the title or the abstract                                                                                               | 1                  |
|                              |        | (b) Provide in the abstract an informative and balanced summary of what was done and what was found                                                                                  | 2                  |
| <b>Introduction</b>          |        |                                                                                                                                                                                      |                    |
| Background/rationale         | 2      | Explain the scientific background and rationale for the investigation being reported                                                                                                 | 6                  |
| Objectives                   | 3      | State specific objectives, including any prespecified hypotheses                                                                                                                     | 6                  |
| <b>Methods</b>               |        |                                                                                                                                                                                      |                    |
| Study design                 | 4      | Present key elements of study design early in the paper                                                                                                                              | 7                  |
| Setting                      | 5      | Describe the setting, locations, and relevant dates, including periods of recruitment, exposure, follow-up, and data collection                                                      | 7                  |
| Participants                 | 6      | (a) Give the eligibility criteria, and the sources and methods of selection of participants                                                                                          | 7                  |
| Variables                    | 7      | Clearly define all outcomes, exposures, predictors, potential confounders, and effect modifiers. Give diagnostic criteria, if applicable                                             | 8-10               |
| Data sources/<br>measurement | 8*     | For each variable of interest, give sources of data and details of methods of assessment (measurement). Describe comparability of assessment methods if there is more than one group | 8-10               |
| Bias                         | 9      | Describe any efforts to address potential sources of bias                                                                                                                            | 7-10               |
| Study size                   | 10     | Explain how the study size was arrived at                                                                                                                                            | 7                  |
| Quantitative variables       | 11     | Explain how quantitative variables were handled in the analyses. If applicable, describe which groupings were chosen and why                                                         | 10                 |
| Statistical methods          | 12     | (a) Describe all statistical methods, including those used to control for confounding                                                                                                | 10                 |
|                              |        | (b) Describe any methods used to examine subgroups and interactions                                                                                                                  | 10                 |
|                              |        | (c) Explain how missing data were addressed                                                                                                                                          | 12                 |
|                              |        | (d) If applicable, describe analytical methods taking account of sampling strategy                                                                                                   | 10                 |
|                              |        | (e) Describe any sensitivity analyses                                                                                                                                                | 10                 |
| <b>Results</b>               |        |                                                                                                                                                                                      |                    |

|                          |     |                                                                                                                                                                                                              |       |
|--------------------------|-----|--------------------------------------------------------------------------------------------------------------------------------------------------------------------------------------------------------------|-------|
| Participants             | 13* | (a) Report numbers of individuals at each stage of study—eg numbers potentially eligible, examined for eligibility, confirmed eligible, included in the study, completing follow-up, and analysed            | 11    |
|                          |     | (b) Give reasons for non-participation at each stage                                                                                                                                                         | 11    |
|                          |     | (c) Consider use of a flow diagram                                                                                                                                                                           | n/a   |
| Descriptive data         | 14* | (a) Give characteristics of study participants (eg demographic, clinical, social) and information on exposures and potential confounders                                                                     | 11    |
|                          |     | (b) Indicate number of participants with missing data for each variable of interest                                                                                                                          | 12    |
| Outcome data             | 15* | Report numbers of outcome events or summary measures                                                                                                                                                         | 12-16 |
| Main results             | 16  | (a) Give unadjusted estimates and, if applicable, confounder-adjusted estimates and their precision (eg, 95% confidence interval). Make clear which confounders were adjusted for and why they were included | 13-15 |
|                          |     | (b) Report category boundaries when continuous variables were categorized                                                                                                                                    | 12-16 |
|                          |     | (c) If relevant, consider translating estimates of relative risk into absolute risk for a meaningful time period                                                                                             | n/a   |
| Other analyses           | 17  | Report other analyses done—eg analyses of subgroups and interactions, and sensitivity analyses                                                                                                               | 12-16 |
| <b>Discussion</b>        |     |                                                                                                                                                                                                              |       |
| Key results              | 18  | Summarise key results with reference to study objectives                                                                                                                                                     | 17-18 |
| Limitations              | 19  | Discuss limitations of the study, taking into account sources of potential bias or imprecision. Discuss both direction and magnitude of any potential bias                                                   | 19    |
| Interpretation           | 20  | Give a cautious overall interpretation of results considering objectives, limitations, multiplicity of analyses, results from similar studies, and other relevant evidence                                   | 17-19 |
| Generalisability         | 21  | Discuss the generalisability (external validity) of the study results                                                                                                                                        | 18    |
| <b>Other information</b> |     |                                                                                                                                                                                                              |       |
| Funding                  | 22  | Give the source of funding and the role of the funders for the present study and, if applicable, for the original study on which the present article is based                                                | 21    |

\*Give information separately for cases and controls in case-control studies and, if applicable, for exposed and unexposed groups in cohort and cross-sectional studies.

**Note:** An Explanation and Elaboration article discusses each checklist item and gives methodological background and published examples of transparent reporting. The STROBE checklist is best used in conjunction with this article (freely available on the Web sites of PLoS Medicine at <http://www.plosmedicine.org/>, Annals of Internal Medicine at <http://www.annals.org/>, and Epidemiology at <http://www.epidem.com/>). Information on the STROBE Initiative is available at [www.strobe-statement.org](http://www.strobe-statement.org).



Supplementary Figure 1. Distribution of EQ5D summary scores by cancer sub-type

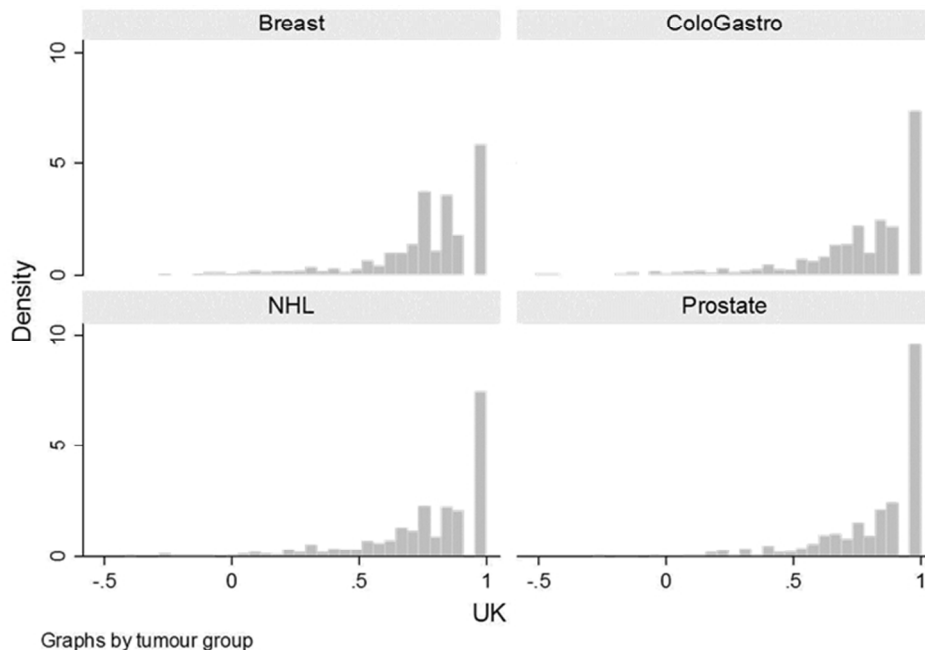

Supplementary Table 1. Quality of Life Dimension Results (EQ5D) by Cancer Sub group

| EQ5D dimension                                                 |                                | Breast<br>(n=854) |      | Colorectal<br>(n=802) |      | Non<br>Hodgkin's<br>Lymphoma<br>(n=778) |      | Prostate<br>(n=866) |      | Total<br>(n=3300) |      |
|----------------------------------------------------------------|--------------------------------|-------------------|------|-----------------------|------|-----------------------------------------|------|---------------------|------|-------------------|------|
|                                                                |                                | n                 | %    | n                     | %    | n                                       | %    | n                   | %    | n                 | %    |
| <b>Mobility</b><br>$\chi^2=51.3$ ,<br>$p<0.001$                | No Problems                    | 567               | 66.4 | 442                   | 55.1 | 427                                     | 54.9 | 535                 | 61.8 | 1971              | 59.7 |
|                                                                | Slight Problems                | 105               | 12.3 | 159                   | 19.8 | 140                                     | 18.0 | 131                 | 15.1 | 535               | 16.2 |
|                                                                | Moderate Problems              | 107               | 12.5 | 120                   | 15.0 | 120                                     | 15.4 | 97                  | 11.2 | 444               | 13.5 |
|                                                                | Severe Problems                | 46                | 5.4  | 57                    | 7.1  | 71                                      | 9.1  | 69                  | 8.0  | 243               | 7.4  |
|                                                                | Cannot walk                    | 8                 | 0.9  | 13                    | 1.6  | 6                                       | 0.8  | 4                   | 0.4  | 31                | 0.9  |
|                                                                | Missing                        | 21                | 2.5  | 11                    | 1.4  | 14                                      | 1.8  | 30                  | 3.5  | 76                | 2.3  |
| <b>Self Care</b><br>$\chi^2=30.4$ ,<br>$p=0.002$               | No Problems                    | 716               | 83.8 | 651                   | 81.2 | 611                                     | 78.5 | 704                 | 81.3 | 2682              | 81.3 |
|                                                                | Slight Problems                | 47                | 5.5  | 67                    | 8.4  | 66                                      | 8.5  | 78                  | 9.0  | 258               | 7.8  |
|                                                                | Moderate Problems              | 45                | 5.3  | 46                    | 5.7  | 71                                      | 9.1  | 44                  | 5.1  | 206               | 6.2  |
|                                                                | Severe Problems                | 12                | 1.4  | 18                    | 2.2  | 12                                      | 1.5  | 9                   | 1.0  | 51                | 1.5  |
|                                                                | Cannot wash/dress              | 6                 | 0.7  | 9                     | 1.1  | 4                                       | 0.5  | 4                   | 0.5  | 23                | 0.7  |
|                                                                | Missing                        | 28                | 3.3  | 11                    | 1.4  | 14                                      | 1.8  | 27                  | 3.1  | 80                | 2.4  |
| <b>Usual<br/>Activities</b><br>$\chi^2=34.5$ ,<br>$p<0.001$    | No Problems                    | 513               | 60.1 | 429                   | 53.5 | 411                                     | 52.8 | 533                 | 61.5 | 1886              | 57.2 |
|                                                                | Slight Problems                | 162               | 19.0 | 173                   | 21.6 | 156                                     | 20.1 | 145                 | 16.7 | 636               | 19.3 |
|                                                                | Moderate Problems              | 111               | 13.0 | 113                   | 14.1 | 127                                     | 16.3 | 104                 | 12.1 | 455               | 13.7 |
|                                                                | Severe Problems                | 31                | 3.6  | 48                    | 6.0  | 49                                      | 6.3  | 43                  | 5.0  | 171               | 5.2  |
|                                                                | Cannot do usual activities     | 14                | 1.6  | 24                    | 3.0  | 26                                      | 3.3  | 15                  | 1.7  | 79                | 2.4  |
|                                                                | Missing                        | 23                | 2.7  | 15                    | 1.8  | 9                                       | 1.2  | 26                  | 3.0  | 73                | 2.2  |
| <b>Pain</b><br>$\chi^2=134.3$ ,<br>$p<0.001$                   | No Pain                        | 329               | 38.5 | 429                   | 53.5 | 408                                     | 52.4 | 526                 | 60.7 | 1692              | 51.3 |
|                                                                | Slight Pain                    | 341               | 39.9 | 220                   | 27.4 | 180                                     | 23.1 | 169                 | 19.5 | 910               | 27.6 |
|                                                                | Moderate Pain                  | 113               | 13.2 | 92                    | 11.5 | 120                                     | 15.4 | 101                 | 11.7 | 426               | 12.9 |
|                                                                | Severe Pain                    | 39                | 4.6  | 35                    | 4.4  | 51                                      | 6.6  | 38                  | 4.4  | 163               | 4.9  |
|                                                                | Extreme Pain                   | 5                 | 0.6  | 9                     | 1.1  | 10                                      | 1.3  | 3                   | 0.3  | 27                | 0.8  |
|                                                                | Missing                        | 27                | 3.2  | 17                    | 2.1  | 9                                       | 1.2  | 29                  | 3.3  | 82                | 2.5  |
| <b>Anxiety/<br/>depression</b><br>$\chi^2=37.1$ ,<br>$p<0.001$ | No anxiety/depression          | 475               | 55.6 | 504                   | 62.8 | 464                                     | 59.6 | 566                 | 65.4 | 2009              | 60.9 |
|                                                                | Slight anxiety/depression      | 241               | 28.2 | 196                   | 24.4 | 186                                     | 23.9 | 183                 | 21.1 | 806               | 24.4 |
|                                                                | Moderate<br>anxiety/depression | 78                | 9.1  | 78                    | 9.7  | 83                                      | 10.7 | 76                  | 8.8  | 315               | 9.5  |
|                                                                | Severe anxiety/depression      | 21                | 2.5  | 6                     | 0.8  | 21                                      | 2.7  | 8                   | 0.9  | 56                | 1.7  |
|                                                                | Extreme<br>anxiety/depression  | 10                | 1.2  | 4                     | 0.5  | 8                                       | 1.0  | 4                   | 0.5  | 26                | 0.8  |
|                                                                | Missing                        | 29                | 3.4  | 14                    | 1.8  | 16                                      | 2.1  | 29                  | 3.3  | 88                | 2.7  |

Supplementary Table 2 Quality of Life Dimension Results (EQ5D) by time since diagnosis of cancer

|                           |                             | 1 year<br>(n=848)         |      | 2 years<br>(n=834) |      | 3 years<br>(n=806) |      | 5 years<br>(n=812) |      | Total<br>(n=3300) |      |      |
|---------------------------|-----------------------------|---------------------------|------|--------------------|------|--------------------|------|--------------------|------|-------------------|------|------|
|                           |                             | N                         | %    | N                  | %    | N                  | %    | N                  | %    | N                 | %    |      |
| <b>Mobility</b>           | No Problems                 | 521                       | 61.4 | 501                | 60.1 | 486                | 60.3 | 463                | 57.0 | 1971              | 59.7 |      |
|                           | $\chi^2=21.1, p=0.05$       | Slight Problems           | 150  | 17.7               | 123  | 14.7               | 127  | 15.8               | 135  | 16.6              | 535  | 16.2 |
|                           | Moderate Problems           | 93                        | 11.0 | 116                | 13.9 | 104                | 12.9 | 131                | 13.1 | 444               | 13.5 |      |
|                           | Severe Problems             | 62                        | 7.3  | 62                 | 7.4  | 56                 | 6.9  | 63                 | 7.8  | 243               | 7.4  |      |
|                           | Cannot walk                 | 2                         | 0.2  | 8                  | 9.6  | 13                 | 1.6  | 8                  | 1.0  | 31                | 0.9  |      |
|                           | Missing                     | 20                        | 2.4  | 24                 | 2.9  | 20                 | 2.5  | 12                 | 1.5  | 76                | 2.3  |      |
| <b>Self Care</b>          | No Problems                 | 696                       | 82.1 | 674                | 80.8 | 659                | 81.8 | 653                | 80.4 | 2682              | 81.3 |      |
|                           | $\chi^2=10.2, p=0.59$       | Slight Problems           | 59   | 6.9                | 65   | 7.8                | 61   | 7.6                | 73   | 9.0               | 258  | 7.8  |
|                           | Moderate Problems           | 57                        | 6.7  | 56                 | 6.7  | 42                 | 5.2  | 51                 | 6.3  | 206               | 6.2  |      |
|                           | Severe Problems             | 12                        | 1.4  | 12                 | 1.4  | 14                 | 1.7  | 13                 | 1.6  | 51                | 1.5  |      |
|                           | Cannot wash/dress           | 3                         | 0.4  | 4                  | 0.5  | 10                 | 1.2  | 6                  | 0.7  | 23                | 0.7  |      |
|                           | Missing                     | 21                        | 2.5  | 23                 | 2.8  | 20                 | 2.5  | 16                 | 2.0  | 80                | 2.4  |      |
| <b>Usual Activities</b>   | No Problems                 | 465                       | 54.8 | 474                | 56.8 | 465                | 57.7 | 482                | 59.4 | 1886              | 57.2 |      |
|                           | $\chi^2=13.9, p=0.31$       | Slight Problems           | 181  | 21.3               | 157  | 18.8               | 161  | 20.0               | 137  | 16.9              | 636  | 19.3 |
|                           | Moderate Problems           | 131                       | 15.4 | 112                | 13.4 | 95                 | 11.8 | 117                | 14.4 | 455               | 13.7 |      |
|                           | Severe Problems             | 35                        | 4.1  | 45                 | 5.4  | 44                 | 5.5  | 47                 | 5.8  | 171               | 5.2  |      |
|                           | Cannot do usual activities  | 18                        | 2.1  | 19                 | 2.3  | 23                 | 2.8  | 19                 | 2.3  | 79                | 2.4  |      |
|                           | Missing                     | 18                        | 2.1  | 27                 | 3.2  | 18                 | 2.2  | 10                 | 1.2  | 73                | 2.2  |      |
| <b>Pain</b>               | No Pain                     | 421                       | 49.6 | 412                | 49.4 | 435                | 54.0 | 424                | 52.2 | 1692              | 51.3 |      |
|                           | $\chi^2=18.0, p=0.12$       | Slight Pain               | 262  | 30.9               | 237  | 28.4               | 198  | 24.6               | 213  | 26.2              | 910  | 27.6 |
|                           | Moderate Pain               | 101                       | 11.9 | 112                | 13.4 | 105                | 13.0 | 108                | 13.3 | 426               | 12.9 |      |
|                           | Severe Pain                 | 34                        | 4.0  | 44                 | 5.3  | 38                 | 4.7  | 47                 | 5.8  | 163               | 4.9  |      |
|                           | Extreme Pain                | 7                         | 0.8  | 6                  | 0.7  | 11                 | 1.4  | 3                  | 0.4  | 27                | 0.8  |      |
|                           | Missing                     | 23                        | 2.7  | 23                 | 2.8  | 19                 | 2.4  | 17                 | 2.1  | 82                | 2.5  |      |
| <b>Anxiety/depression</b> | No anxiety/depression       | 466                       | 55.0 | 505                | 60.6 | 499                | 61.9 | 539                | 66.4 | 2009              | 60.9 |      |
|                           | $\chi^2=25.8, p=0.01$       | Slight anxiety/depression | 244  | 28.8               | 195  | 23.4               | 196  | 24.3               | 171  | 21.1              | 806  | 24.4 |
|                           | Moderate anxiety/depression | 88                        | 10.4 | 86                 | 10.3 | 68                 | 8.4  | 73                 | 9.0  | 315               | 9.5  |      |
|                           | Severe anxiety/depression   | 20                        | 2.4  | 13                 | 1.5  | 13                 | 1.6  | 10                 | 1.2  | 56                | 1.7  |      |
|                           | Extreme anxiety/depression  | 6                         | 0.7  | 8                  | 1.0  | 6                  | 0.7  | 6                  | 0.7  | 26                | 0.8  |      |
|                           | Missing                     | 24                        | 2.8  | 27                 | 3.2  | 24                 | 3.0  | 13                 | 1.6  | 88                | 2.7  |      |

**Supplementary Table 3. EQ5D outcome category by the number of Long Term Conditions (LTC) in patients in remission**

| EQ5D Categories | High QoL (Scores=1) |             | Medium QoL (0.5≤Scores<1) |             | Low QoL (Scores<0.5) |            | Missing   |            | Total        |
|-----------------|---------------------|-------------|---------------------------|-------------|----------------------|------------|-----------|------------|--------------|
|                 | n                   | %           | n                         | %           | n                    | %          | n         | %          |              |
| No LTC          | 436                 | 51.4        | 376                       | 44.3        | 18                   | 2.1        | 18        | 2.1        | 848          |
| 1 LTC           | 250                 | 36.2        | 378                       | 54.7        | 40                   | 5.8        | 23        | 3.3        | 691          |
| ≥2 LTC          | 129                 | 18.8        | 419                       | 60.9        | 119                  | 17.3       | 21        | 3.1        | 688          |
| <b>Total</b>    | <b>815</b>          | <b>36.6</b> | <b>1,173</b>              | <b>52.7</b> | <b>177</b>           | <b>7.9</b> | <b>62</b> | <b>2.8</b> | <b>2,227</b> |

**Supplementary Table 4. EQ5D outcome category by the number of Long Term Conditions (LTC) in patients not in remission**

| EQ5D Categories | High QoL (Scores=1) |             | Medium QoL (0.5≤Scores<1) |             | Low QoL (Scores<0.5) |             | Missing   |            | Total      |
|-----------------|---------------------|-------------|---------------------------|-------------|----------------------|-------------|-----------|------------|------------|
|                 | n                   | %           | n                         | %           | n                    | %           | n         | %          |            |
| No LTC          | 79                  | 33.9        | 130                       | 55.8        | 15                   | 6.4         | 9         | 3.9        | 233        |
| 1 LTC           | 64                  | 23.1        | 175                       | 63.2        | 25                   | 9.0         | 13        | 4.7        | 277        |
| ≥2 LTC          | 37                  | 11.9        | 166                       | 53.2        | 94                   | 30.1        | 15        | 4.8        | 312        |
| <b>Total</b>    | <b>180</b>          | <b>21.9</b> | <b>471</b>                | <b>57.3</b> | <b>134</b>           | <b>16.3</b> | <b>37</b> | <b>4.5</b> | <b>822</b> |

**Supplementary Table 5. Fear of Dying and Recurrence of Disease by Time since Diagnosis**

| Fear of Dying             | Yes%         |             | No           |             | Missing    |            | Total        |
|---------------------------|--------------|-------------|--------------|-------------|------------|------------|--------------|
|                           | n            | %           | n            | %           | n          | %          |              |
| 1 year ago                | 256          | 30.2        | 542          | 63.9        | 50         | 5.9        | 848          |
| 2 years ago               | 233          | 27.9        | 543          | 65.1        | 58         | 7.0        | 834          |
| 3 years ago               | 214          | 26.6        | 531          | 65.9        | 61         | 7.6        | 806          |
| 5 years ago               | 180          | 22.2        | 583          | 71.8        | 49         | 6.0        | 812          |
| <b>Total</b>              | <b>883</b>   | <b>26.8</b> | <b>2,199</b> | <b>66.6</b> | <b>218</b> | <b>6.6</b> | <b>3,300</b> |
| <b>Fear of Recurrence</b> | <b>n</b>     | <b>%</b>    | <b>n</b>     | <b>%</b>    | <b>n</b>   | <b>%</b>   |              |
| 1 year ago                | 437          | 51.5        | 369          | 43.5        | 42         | 5.0        | 848          |
| 2 years ago               | 403          | 48.3        | 398          | 47.7        | 33         | 4.0        | 834          |
| 3 years ago               | 376          | 46.7        | 384          | 47.6        | 46         | 5.7        | 806          |
| 5 years ago               | 345          | 42.5        | 427          | 52.6        | 40         | 4.9        | 812          |
| <b>Total</b>              | <b>1,561</b> | <b>47.3</b> | <b>1,578</b> | <b>47.8</b> | <b>161</b> | <b>4.9</b> | <b>3,300</b> |
