# Supplementary figures and images for: Patient-reported outcomes of cancer survivors in England 1–5 years after diagnosis: a cross-sectional survey
Source: HighWire-hosted journal article supplement (doi:10.1136/bmjopen-2012-002317), 2013-01-01

Supplementary Figure 1. Distribution of EQ5D summary scores by cancer sub-type

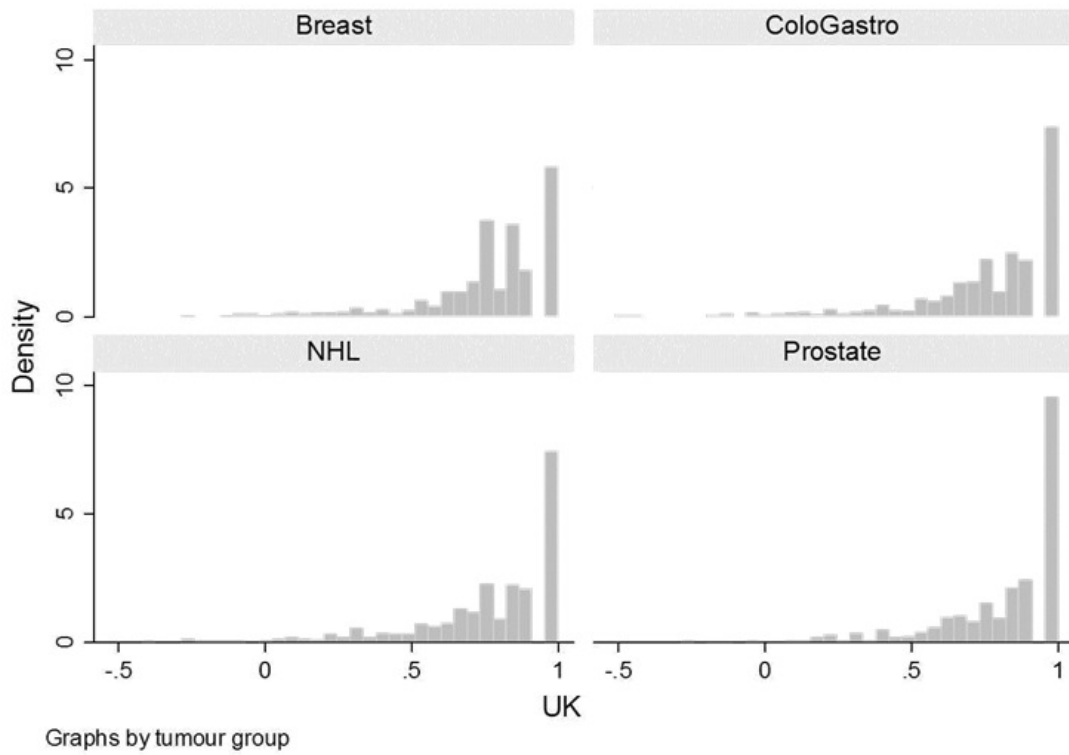

Supplement: bmjopen-2012-002317supp_figure1.pdf [file bmjopen-2012-002317supp_figure1.pdf]
